# Supplementary material for: Bifunctional iron-mediated multicomponent Markovnikov-selective radical hydrothiolation of alkenes
Source: Royal Society of Chemistry journal article supplement (doi:10.1039/d5qo00308c), 2025-01-01

## Supporting Information

# Bifunctional Iron-Mediated Multicomponent Markovnikov-Selective Radical Hydrothiolation of Alkenes

Yi-Nuo Wang,<sup>b</sup> Hongyu Jia,<sup>a</sup> Lan Yao,<sup>b</sup> Yu Chen,<sup>b</sup> Han-Le Liu,<sup>b</sup> Fengbing Liang,<sup>a</sup>

Dexin Feng<sup>\*a</sup> and Da-Zhen Xu<sup>\*b</sup>

<sup>a</sup>Qingdao Institute of Bioenergy and Bioprocess Technology, Chinese Academy of Sciences, Qingdao 266101, China. E-mail: [fengdx@qibebt.ac.cn](mailto:fengdx@qibebt.ac.cn).

<sup>b</sup>National Engineering Research Center of Pesticide, College of Chemistry, Nankai University, Tianjin 300071, China. E-mail: [xudazhen@nankai.edu.cn](mailto:xudazhen@nankai.edu.cn)

### Table of contents

|                                                            |      |
|------------------------------------------------------------|------|
| 1. General information .....                               | S2   |
| 2. Optimization details .....                              | S2   |
| 3. General procedure for the synthesis of compound 4 ..... | S3   |
| 4. General procedure for the synthesis of compound 6 ..... | S5   |
| 5. Synthetic applications.....                             | S5   |
| 6. Mechanistic studies .....                               | S7   |
| 7. Characterization data for compound 4 .....              | S11  |
| 8. Characterization data for compound 6 .....              | S31  |
| 9. Characterization data for compound 7-11 .....           | S32  |
| 10. References .....                                       | S35  |
| 11. Spectroscopic data for compound 4 .....                | S36  |
| 12. Spectroscopic data for compounds compound 6 .....      | S125 |
| 13. Spectroscopic data for compounds compound 7-11 .....   | S133 |

## 1. General information

All reagents including the starting materials (alkenes, carbon disulfide and amines) and solvents were purchased from commercial vendors and used without further purification. Melting points were determined with an X-4 apparatus and are uncorrected.  $^1\text{H}$  NMR and  $^{13}\text{C}$  NMR spectra were recorded on a Bruker AV-400 spectrometer with DMSO- $d_6$  or  $\text{CDCl}_3$  as the solvent. Chemical shifts are reported relative to TMS as internal standard. The  $^1\text{H}$  NMR data are reported as the chemical shift in parts per million, multiplicity (s, singlet; d, doublet; t, triplet; m, multiplet), coupling constant in hertz, and number of protons. HRMS were obtained on an IonSpec FT-ICR mass spectrometer with ESI resource.

## 2. Optimization details

**Table S1.** Optimization of the reaction conditions.<sup>[a]</sup>

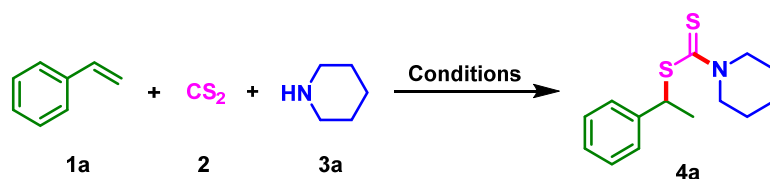

| Entry            | Cat (20 mol%)     | Fe(acac) <sub>3</sub><br>(x mol%) | Silane<br>(2 equiv) | Solvent (0.5M) | T<br>(°C) | Time<br>(h) | Yield<br>(%) |
|------------------|-------------------|-----------------------------------|---------------------|----------------|-----------|-------------|--------------|
| 1                | FeCl <sub>3</sub> | Fe(acac) <sub>3</sub> (10)        | PhSiH <sub>3</sub>  | EtOH-DMF (1:1) | r.t.      | 12          | 8            |
| 2                | FeCl <sub>3</sub> | Fe(acac) <sub>3</sub> (50)        | PhSiH <sub>3</sub>  | EtOH-DMF (1:1) | r.t.      | 12          | 10           |
| 3                | FeCl <sub>3</sub> | Fe(acac) <sub>3</sub> (100)       | PhSiH <sub>3</sub>  | EtOH-DMF (1:1) | r.t.      | 12          | 65           |
| 4                | ---               | Fe(acac) <sub>3</sub> (100)       | PhSiH <sub>3</sub>  | EtOH-DMF (1:1) | r.t.      | 12          | ---          |
| 5                | FeCl <sub>3</sub> | ---                               | PhSiH <sub>3</sub>  | EtOH-DMF (1:1) | r.t.      | 12          | ---          |
| 6 <sup>[b]</sup> | FeCl <sub>3</sub> | Fe(acac) <sub>3</sub> (100)       | ---                 | EtOH-DMF (1:1) | r.t.      | 12          | ---          |
| 7 <sup>[c]</sup> | FeCl <sub>3</sub> | Fe(acac) <sub>3</sub> (100)       | PhSiH <sub>3</sub>  | EtOH-DMF (1:1) | r.t.      | 12          | 37           |
| 8 <sup>[d]</sup> | FeCl <sub>3</sub> | Fe(acac) <sub>3</sub> (100)       | PhSiH <sub>3</sub>  | EtOH-DMF (1:1) | r.t.      | 12          | 64           |
| 9 <sup>[e]</sup> | FeCl <sub>3</sub> | Fe(acac) <sub>3</sub> (100)       | PhSiH <sub>3</sub>  | EtOH-DMF (1:1) | r.t.      | 12          | 60           |
| 10               | FeCl <sub>3</sub> | Fe(acac) <sub>3</sub> (100)       | PhSiH <sub>3</sub>  | EtOH-DMF (1:1) | 60        | 1           | 63           |
| 11               | FeCl <sub>3</sub> | Fe(acac) <sub>3</sub> (50)        | PhSiH <sub>3</sub>  | EtOH-DMF (1:1) | 60        | 1           | 63           |
| 12               | FeCl <sub>3</sub> | Fe(acac) <sub>3</sub> (10)        | PhSiH <sub>3</sub>  | EtOH-DMF (1:1) | 60        | 1           | 65           |
| 13               | FeCl <sub>3</sub> | Fe(acac) <sub>3</sub> (10)        | PhSiH <sub>3</sub>  | EtOH           | 60        | 1           | 68           |
| 14               | FeCl <sub>3</sub> | Fe(acac) <sub>3</sub> (10)        | PhSiH <sub>3</sub>  | i-PrOH         | 60        | 1           | trace        |
| 15               | FeCl <sub>3</sub> | Fe(acac) <sub>3</sub> (10)        | PhSiH <sub>3</sub>  | t-BuOH         | 60        | 1           | trace        |
| 16               | FeCl <sub>3</sub> | Fe(acac) <sub>3</sub> (10)        | PhSiH <sub>3</sub>  | DMF            | 60        | 1           | 9            |

|                   |                                                                    |                            |                                  |                             |    |   |       |
|-------------------|--------------------------------------------------------------------|----------------------------|----------------------------------|-----------------------------|----|---|-------|
| 17                | FeCl <sub>3</sub>                                                  | Fe(acac) <sub>3</sub> (10) | PhSiH <sub>3</sub>               | DMSO                        | 60 | 1 | 15    |
| 18                | FeCl <sub>3</sub>                                                  | Fe(acac) <sub>3</sub> (10) | PhSiH <sub>3</sub>               | dioxane                     | 60 | 1 | ---   |
| 19                | FeCl <sub>3</sub>                                                  | Fe(acac) <sub>3</sub> (10) | PhSiH <sub>3</sub>               | THF                         | 50 | 1 | trace |
| 20                | FeCl <sub>3</sub>                                                  | Fe(acac) <sub>3</sub> (10) | PhSiH <sub>3</sub>               | EtOH-H <sub>2</sub> O (1:1) | 60 | 1 | trace |
| 21                | FeCl <sub>3</sub>                                                  | Fe(acac) <sub>3</sub> (10) | PhSiH <sub>3</sub>               | EtOH                        | 50 | 4 | 59    |
| 22                | FeCl <sub>3</sub>                                                  | Fe(acac) <sub>3</sub> (10) | PhSiH <sub>3</sub>               | EtOH                        | 40 | 4 | 34    |
| 23                | FeBr <sub>3</sub>                                                  | Fe(acac) <sub>3</sub> (10) | PhSiH <sub>3</sub>               | EtOH                        | 60 | 1 | 60    |
| 24                | Fe <sub>2</sub> (SO <sub>4</sub> ) <sub>3</sub> ·xH <sub>2</sub> O | Fe(acac) <sub>3</sub> (10) | PhSiH <sub>3</sub>               | EtOH                        | 60 | 1 | 53    |
| 25                | Fe(NO <sub>3</sub> ) <sub>3</sub> ·9H <sub>2</sub> O               | Fe(acac) <sub>3</sub> (10) | PhSiH <sub>3</sub>               | EtOH                        | 60 | 1 | 45    |
| 26                | Fe(CF <sub>3</sub> SO <sub>3</sub> ) <sub>3</sub>                  | Fe(acac) <sub>3</sub> (10) | PhSiH <sub>3</sub>               | EtOH                        | 60 | 1 | 48    |
| 27                | FeCl <sub>2</sub> ·4H <sub>2</sub> O                               | Fe(acac) <sub>3</sub> (10) | PhSiH <sub>3</sub>               | EtOH                        | 60 | 1 | 6     |
| 28                | Fe(OAc) <sub>2</sub>                                               | Fe(acac) <sub>3</sub> (10) | PhSiH <sub>3</sub>               | EtOH                        | 60 | 1 | 7     |
| 29                | Cu(OAc) <sub>2</sub> ·H <sub>2</sub> O                             | Fe(acac) <sub>3</sub> (10) | PhSiH <sub>3</sub>               | EtOH                        | 60 | 1 | 15    |
| 30                | FeCl <sub>3</sub>                                                  | Fe(acac) <sub>3</sub> (10) | PhSiH <sub>3</sub>               | EtOH                        | 60 | 1 | 68    |
| 31 <sup>[f]</sup> | FeCl <sub>3</sub>                                                  | Fe(acac) <sub>3</sub> (10) | PhSiH <sub>3</sub>               | EtOH                        | 60 | 1 | 67    |
| 32 <sup>[g]</sup> | FeCl <sub>3</sub>                                                  | Fe(acac) <sub>3</sub> (10) | PhSiH <sub>3</sub>               | EtOH                        | 60 | 1 | 56    |
| 33                | FeCl <sub>3</sub>                                                  | Fe(acac) <sub>3</sub> (10) | Ph <sub>2</sub> SiH <sub>2</sub> | EtOH                        | 60 | 1 | trace |
| 34                | FeCl <sub>3</sub>                                                  | Fe(acac) <sub>3</sub> (10) | Ph <sub>3</sub> SiH              | EtOH                        | 60 | 1 | trace |
| 35                | FeCl <sub>3</sub>                                                  | Fe(acac) <sub>3</sub> (10) | PhMeSiH                          | EtOH                        | 60 | 1 | 41    |
| 36                | FeCl <sub>3</sub>                                                  | Fe(acac) <sub>3</sub> (10) | Et <sub>3</sub> SiH              | EtOH                        | 60 | 1 | trace |
| 37                | FeCl <sub>3</sub>                                                  | Fe(acac) <sub>3</sub> (10) | HSi(OEt) <sub>3</sub>            | EtOH                        | 60 | 1 | trace |

<sup>[a]</sup> Reaction conditions: **1a** (1.0 mmol, 1.0 equiv), **2** (2.5 mmol, 2.5 equiv), **3a** (1.2 mmol, 1.2 equiv), Cat. (20 mol%), silane (2.0 mmol, 2.0 equiv), solvent (2.0 mL), under open air.

<sup>[b]</sup> Without silane.

<sup>[c]</sup> PhSiH<sub>3</sub> 1 equiv.

<sup>[d]</sup> PhSiH<sub>3</sub> 3 equiv.

<sup>[e]</sup> PhSiH<sub>3</sub> 5 equiv.

<sup>[f]</sup> CS<sub>2</sub> 3 equiv.

<sup>[g]</sup> CS<sub>2</sub> 2 equiv.

### 3. General procedure for the synthesis of compound 4

Condition A:

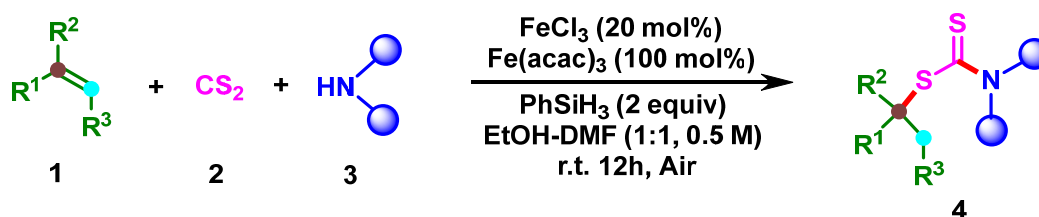

In a 10-mL reaction vial, equipped with a magnetic stirring bar, CS<sub>2</sub> (2.5 mmol, 2.5 equiv) and respective amines (1.2 mmol, 1.2 equiv) were added to EtOH-DMF (1:1,

2.0 mL) at room temperature. After 10 min of stirring the resulting solution, alkenes (1.0 mmol, 1.0 equiv), phenylsilane (2.0 mmol, 2.0 equiv), FeCl<sub>3</sub> (20 mol%, 0.2 equiv) and Fe(acac)<sub>3</sub> (1.0 mmol, 1.0 equiv) were added. Then the mixture was allowed to stir overnight at room temperature. The formation of the products was monitored by TLC. After completion of the reaction, the mixture was quenched with brine (15 mL) and extracted with ethyl acetate (3×10 mL). After drying with anhydrous Na<sub>2</sub>SO<sub>4</sub>, the organic layer was concentrated under reduced pressure and the residue was purified by column chromatography on silica gel (200–300 mesh) using petroleum/ethyl acetate (170/1–40/1) as eluent to afford the pure product.

Condition B:

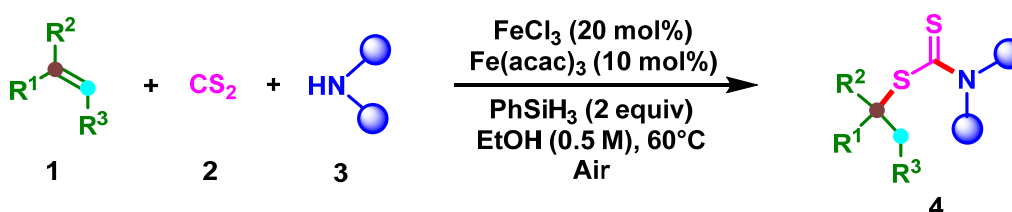

In a 10-mL reaction vial, equipped with a magnetic stirring bar, CS<sub>2</sub> (2.5 mmol, 2.5 equiv) and respective amines (1.2 mmol, 1.2 equiv) were added to ethanol (2.0 mL) at room temperature. After 10 min of stirring the resulting solution, alkenes (1.0 mmol, 1.0 equiv), phenylsilane (2.0 mmol, 2.0 equiv), FeCl<sub>3</sub> (20 mol%, 0.2 equiv) and Fe(acac)<sub>3</sub> (0.1 mmol, 0.1 equiv) were added. Then the vial was placed in a pre-heated metal block at 60 °C in the presence of ambient air. The formation of the products was monitored by TLC. After completion of the reaction, the mixture was quenched with brine (15 mL) and cooled to room temperature. Then the mixture was extracted with ethyl acetate (3×10 mL). After drying with anhydrous Na<sub>2</sub>SO<sub>4</sub>, the organic layer was concentrated under reduced pressure and the residue was purified by column chromatography on silica gel (200–300 mesh) using petroleum/ethyl acetate (170/1–40/1) as eluent to afford the pure product.

#### 4. General procedure for the synthesis of compound 6

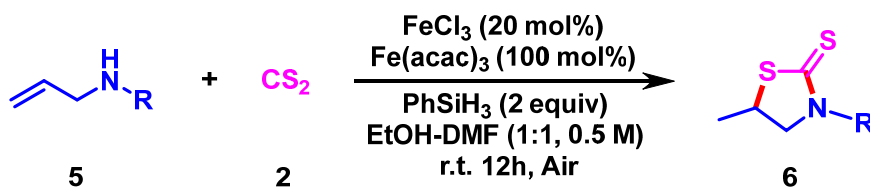

In a 10-mL reaction vial, equipped with a magnetic stirring bar,  $\text{CS}_2$  (2.5 mmol, 2.5 equiv) and allylamine (1.0 mmol, 1.0 equiv) were added to EtOH-DMF (1:1, 2.0 mL) at room temperature. After 10 min of stirring the resulting solution, phenylsilane (2.0 mmol, 2.0 equiv),  $\text{FeCl}_3$  (20 mol%, 0.2 equiv) and  $\text{Fe}(\text{acac})_3$  (1.0 mmol, 1.0 equiv) were added. Then the mixture was allowed to stir overnight at room temperature. The formation of the products was monitored by TLC. After completion of the reaction, the mixture was quenched with brine (15 mL) and extracted with ethyl acetate ( $3 \times 10$  mL). After drying with anhydrous  $\text{Na}_2\text{SO}_4$ , the organic layer was concentrated under reduced pressure and the residue was purified by column chromatography on silica gel (200–300 mesh) using petroleum/ethyl acetate (50/1–40/1) as eluent to afford the pure product.

#### 5. Synthetic applications

The substrates in Scheme 2 were prepared according the reported literature.<sup>[1,2]</sup>

##### 5.1 General procedure for the late-stage modification of natural product and drugs

In a 10-mL reaction vial, equipped with a magnetic stirring bar,  $\text{CS}_2$  (2.5 mmol, 2.5 equiv) and respective amines (1.2 mmol, 1.2 equiv) were added to EtOH-DMF (1:1, 2.0 mL) at room temperature. After 10 min of stirring the resulting solution, alkene derivatives of complex molecules (1.0 mmol, 1.0 equiv), phenylsilane (2.0 mmol, 2.0 equiv),  $\text{FeCl}_3$  (20 mol%, 0.2 equiv) and  $\text{Fe}(\text{acac})_3$  (1.0 mmol, 1.0 equiv) were added. Then the mixture was allowed to stir overnight at room temperature. The formation of the products was monitored by TLC. After completion of the reaction, the mixture was quenched with brine (15 mL) and extracted with ethyl acetate ( $3 \times 10$  mL). After drying with anhydrous  $\text{Na}_2\text{SO}_4$ , the organic layer was concentrated under reduced pressure and the residue was purified by column chromatography on silica gel (200–300 mesh) using

petroleum/ethyl acetate (20/1) as eluent to afford the pure product.

## 5.2 Gram-scale synthesis of **4a** and **4w**

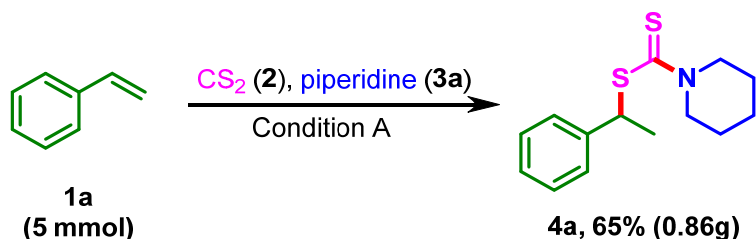

In a 50-mL reaction vial, equipped with a magnetic stirring bar,  $\text{CS}_2$  (12.5 mmol, 2.5 equiv) and piperidine **3a** (6.0 mmol, 1.2 equiv) were added to EtOH-DMF (1:1, 10.0 mL) at room temperature. After 30 min of stirring the resulting solution, styrene **1a** (5.0 mmol, 1.0 equiv), phenylsilane (10.0 mmol, 2.0 equiv),  $\text{FeCl}_3$  (20 mol%, 0.2 equiv) and  $\text{Fe}(\text{acac})_3$  (5.0 mmol, 1.0 equiv) were added. Then the mixture was allowed to stir overnight at room temperature. The formation of the products was monitored by TLC. After completion of the reaction, the mixture was quenched with brine (30 mL) and extracted with ethyl acetate (3×25 mL). After drying with anhydrous  $\text{Na}_2\text{SO}_4$ , the organic layer was concentrated under reduced pressure and the residue was purified by column chromatography on silica gel (200–300 mesh) using petroleum/ethyl acetate (160/1) as eluent to afford the pure product **4a** in 65% yield (0.86g).

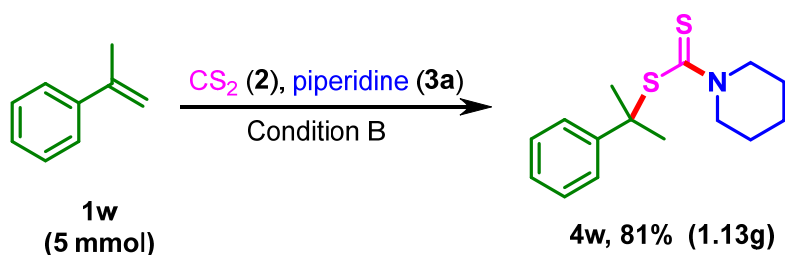

In a 50-mL reaction vial, equipped with a magnetic stirring bar,  $\text{CS}_2$  (12.5 mmol, 2.5 equiv) and piperidine **3a** (6.0 mmol, 1.2 equiv) were added to ethanol (10.0 mL) at room temperature. After 30 min of stirring the resulting solution,  $\alpha$ -methylstyrene **1w** (5.0 mmol, 1.0 equiv), phenylsilane (10.0 mmol, 2.0 equiv),  $\text{FeCl}_3$  (20 mol%, 0.2 equiv) and  $\text{Fe}(\text{acac})_3$  (0.5 mmol, 0.1 equiv) were added. Then the vial was placed in a pre-heated metal block at 60 °C in the presence of ambient air. The formation of the products was monitored by TLC. After completion of the reaction, the mixture was quenched

with brine (30 mL) and cooled to room temperature. Then the mixture was extracted with ethyl acetate (3×25 mL). After drying with anhydrous Na<sub>2</sub>SO<sub>4</sub>, the organic layer was concentrated under reduced pressure and the residue was purified by column chromatography on silica gel (200–300 mesh) using petroleum/ethyl acetate (100/1) as eluent to afford the pure product **4w** in 81% yield (1.13g).

## 6. Mechanistic studies

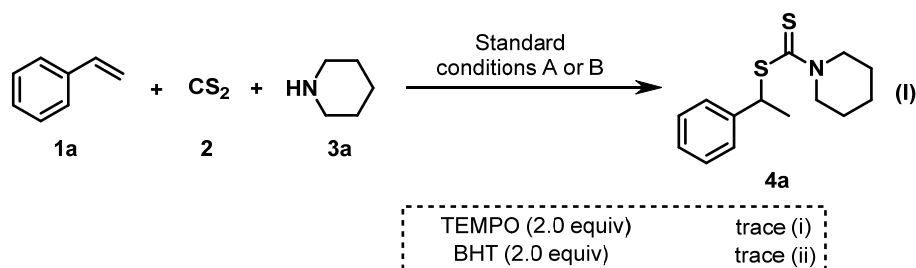

Conditions A:

In a 10-mL reaction vial, equipped with a magnetic stirring bar, CS<sub>2</sub> (2.5 mmol, 2.5 equiv) and piperidine **3a** (1.2 mmol, 1.2 equiv) were added to EtOH-DMF (1:1, 2.0 mL) at room temperature. After 10 min of stirring the resulting solution, styrene **1a** (1.0 mmol, 1.0 equiv), phenylsilane (2.0 mmol, 2.0 equiv), FeCl<sub>3</sub> (20 mol%, 0.2 equiv), Fe(acac)<sub>3</sub> (1.0 mmol, 1.0 equiv) and TEMPO (2.0 equiv) or BHT (2.0 equiv) were added. Then the mixture was allowed to stir overnight at room temperature. The reactions were monitored by TLC.

Conditions B:

In a 10-mL reaction vial, equipped with a magnetic stirring bar, CS<sub>2</sub> (2.5 mmol, 2.5 equiv) and piperidine **3a** (1.2 mmol, 1.2 equiv) were added to ethanol (2.0 mL) at room temperature. After 10 min of stirring the resulting solution, styrene **1a** (1.0 mmol, 1.0 equiv), phenylsilane (2.0 mmol, 2.0 equiv), FeCl<sub>3</sub> (20 mol%, 0.2 equiv) and Fe(acac)<sub>3</sub> (0.1 mmol, 0.1 equiv) and TEMPO (2.0 equiv) or BHT (2.0 equiv) were added. Then the vial was placed in a pre-heated metal block at 60 °C in the presence of ambient air. The formation of the products was monitored by TLC.

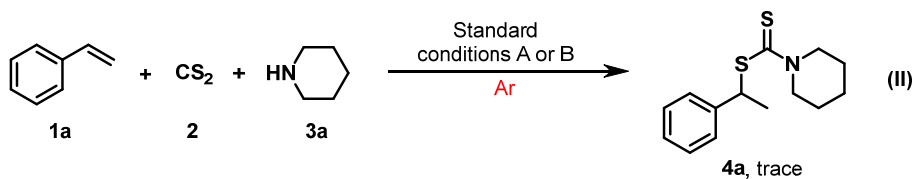

#### Conditions A:

In a 10-mL reaction vial, equipped with a magnetic stirring bar,  $\text{CS}_2$  (2.5 mmol, 2.5 equiv) and piperidine **3a** (1.2 mmol, 1.2 equiv) were added to EtOH-DMF (1:1, 2.0 mL) at room temperature. After 10 min of stirring the resulting solution, styrene **1a** (1.0 mmol, 1.0 equiv), phenylsilane (2.0 mmol, 2.0 equiv),  $\text{FeCl}_3$  (20 mol%, 0.2 equiv) and  $\text{Fe}(\text{acac})_3$  (1.0 mmol, 1.0 equiv) were added under an argon atmosphere. Then the mixture was allowed to stir overnight at room temperature. The reactions were monitored by TLC.

#### Conditions B:

In a 10-mL reaction vial, equipped with a magnetic stirring bar,  $\text{CS}_2$  (2.5 mmol, 2.5 equiv) and piperidine **3a** (1.2 mmol, 1.2 equiv) were added to ethanol (2.0 mL) at room temperature. After 10 min of stirring the resulting solution, styrene **1a** (1.0 mmol, 1.0 equiv), phenylsilane (2.0 mmol, 2.0 equiv),  $\text{FeCl}_3$  (20 mol%, 0.2 equiv) and  $\text{Fe}(\text{acac})_3$  (0.1 mmol, 0.1 equiv) were added under an argon atmosphere. Then the vial was placed in a pre-heated metal block at 60 °C. The formation of the products was monitored by TLC.

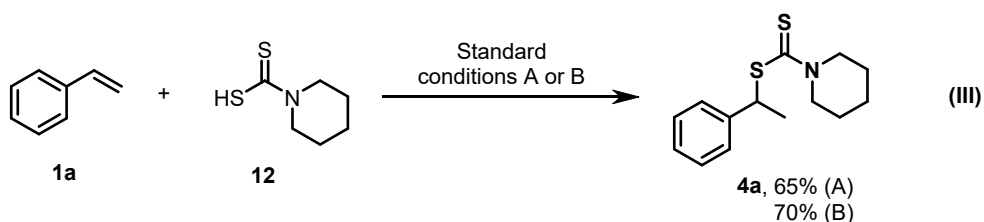

#### Conditions A:

In a 10-mL reaction vial, equipped with a magnetic stirring bar, styrene **1a** (1.0 mmol, 1.0 equiv), piperidine-1-carbodithioic acid **12** (1.2 mmol, 1.2 equiv), phenylsilane (2.0 mmol, 2.0 equiv),  $\text{FeCl}_3$  (20 mol%, 0.2 equiv) and  $\text{Fe}(\text{acac})_3$  (1.0 mmol, 1.0 equiv) were added to EtOH-DMF (1:1, 2.0 mL) at room temperature. Then the mixture was allowed



pressure and the residue was purified by column chromatography on silica gel (200–300 mesh) using petroleum/ethyl acetate (150/1) as eluent to afford the pure product **13** (13.4 mg, 11%) and **14** (51.5 mg, 43%).

#### Conditions B:

In a 10-mL reaction vial, equipped with a magnetic stirring bar, styrene **1a** (1.0 mmol, 1.0 equiv), phenylsilane (2.0 mmol, 2.0 equiv), FeCl<sub>3</sub> (20 mol%, 0.2 equiv) and Fe(acac)<sub>3</sub> (0.1 mmol, 0.1 equiv) were added to ethanol (2.0 mL) at room temperature. Then the mixture was placed in a pre-heated metal block at 60 °C. The formation of the products was monitored by TLC. After completion of the reaction, the mixture was quenched with brine (15 mL) and extracted with ethyl acetate (3×10 mL). After drying with anhydrous Na<sub>2</sub>SO<sub>4</sub>, the organic layer was concentrated under reduced pressure and the residue was purified by column chromatography on silica gel (200–300 mesh) using petroleum/ethyl acetate (150/1) as eluent to afford the pure product **13** (10.9 mg, 9%) and **14** (59.9 mg, 55%).

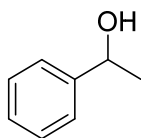

#### 1-Phenylethanol (**13**)<sup>[3]</sup>

colorless liquid; <sup>1</sup>H NMR (400MHz, CDCl<sub>3</sub>): δ = 7.27 (d, 4H, ArH, *J* = 4.4 Hz), 7.21 (m, 1H, ArH), 4.74 (m, 1H, CH), 3.03 (br s, 1H, OH), 1.38 (d, 3H, CH<sub>3</sub>, *J* = 6.4 Hz). <sup>13</sup>C NMR (101MHz, CDCl<sub>3</sub>): δ = 146.0, 128.5, 127.4, 125.5, 70.2, 25.2.

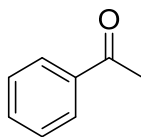

#### Acetophenone (**14**)<sup>[4]</sup>

colorless liquid; <sup>1</sup>H NMR (400MHz, CDCl<sub>3</sub>): δ = 7.93 (d, 2H, ArH, *J* = 7.2 Hz), 7.53 (t, 1H, ArH, *J* = 7.2 Hz), 7.43 (t, 2H, ArH, *J* = 8.0 Hz), 2.56 (s, 3H, CH<sub>3</sub>). <sup>13</sup>C NMR (101MHz, CDCl<sub>3</sub>): δ = 198.0, 137.1, 133.1, 128.5, 128.2, 26.5.

## 7. Characterization data for compound 4

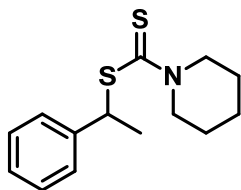

### 1-Phenylethylpiperidine-1-carbodithioate (4a)<sup>[5]</sup>

The title compound was isolated by silica-gel column chromatography (eluent: petroleum ether /EtOAc = 160:1, v/v) as a light yellow oil liquid in 68% yield (180.5 mg). <sup>1</sup>H NMR (400 MHz, CDCl<sub>3</sub>) δ 7.35 (d, 2H, ArH, *J* = 7.2 Hz), 7.24 (t, 2H, ArH, *J* = 7.6 Hz), 7.18-7.16 (m, 1H, ArH), 5.24-5.19 (m, 1H, CH), 4.19 (br s, 2H, CH<sub>2</sub>), 3.75 (br s, 2H, CH<sub>2</sub>), 1.70 (d, 3H, CH<sub>3</sub>, *J* = 7.2 Hz), 1.59-1.48 (m, 6H, CH<sub>2</sub>). <sup>13</sup>C NMR (100 MHz, CDCl<sub>3</sub>) δ 194.6, 142.2, 128.5, 127.9, 127.4, 52.7, 51.3 50.9, 26.0, 25.5, 24.3, 22.2.

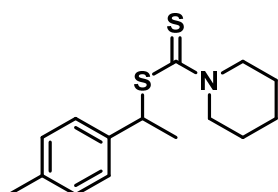

### 1-(p-Tolyl)ethylpiperidine-1-carbodithioate (4b)

The title compound was isolated by silica-gel column chromatography (eluent: petroleum ether /EtOAc = 160:1, v/v) as a light yellow oil liquid in 52% yield (145.3 mg). <sup>1</sup>H NMR (400 MHz, CDCl<sub>3</sub>) δ 7.25 (d, 2H, ArH, *J* = 8.0 Hz), 7.05 (d, 2H, ArH, *J* = 7.6 Hz), 5.22-5.16 (m, 1H, CH), 4.17 (br s, 2H, CH<sub>2</sub>), 3.74 (br s, 2H, CH<sub>2</sub>), 2.25 (s, 3H, CH<sub>3</sub>), 1.71 (d, 3H, CH<sub>3</sub>, *J* = 7.2 Hz), 1.58-1.53 (m, 6H, CH<sub>2</sub>). <sup>13</sup>C NMR (100 MHz, CDCl<sub>3</sub>) δ 194.7, 139.2, 137.1, 129.3, 127.8, 52.6, 51.3, 50.8, 26.1, 25.6, 24.4, 22.3, 21.2. HRMS (ESI) *m/z*: calcd for C<sub>15</sub>H<sub>22</sub>NS<sub>2</sub><sup>+</sup> ([M+H]<sup>+</sup>), 280.1188; found, 280.1179.

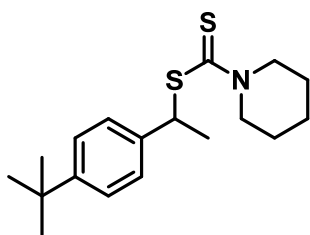

### 1-(4-(Tert-butyl)phenyl)ethylpiperidine-1-carbodithioate (4c)

The title compound was isolated by silica-gel column chromatography (eluent: petroleum ether /EtOAc = 160:1, v/v) as a light yellow oil liquid in 65% yield (209.0 mg). <sup>1</sup>H NMR (400 MHz, DMSO-*d*<sub>6</sub>) δ 7.36-7.31 (m, 4H, ArH), 5.14-5.09 (m, 1H, CH), 4.20 (br s, 2H, CH<sub>2</sub>), 3.82 (br s, 2H, CH<sub>2</sub>), 1.68 (d, 3H, CH<sub>3</sub>, *J* = 6.8 Hz), 1.64-1.45 (m, 6H, CH<sub>2</sub>), 1.26 (s, 9H, CH<sub>3</sub>). <sup>13</sup>C NMR (100 MHz, DMSO-*d*<sub>6</sub>) δ 193.2, 150.2, 139.2, 127.8, 125.7, 52.5, 51.3, 50.4, 31.6, 26.3, 25.7, 24.0, 22.5. HRMS (ESI) *m/z*: calcd for C<sub>18</sub>H<sub>28</sub>NS<sub>2</sub><sup>+</sup> ([M+H]<sup>+</sup>), 322.1658; found, 322.1655.

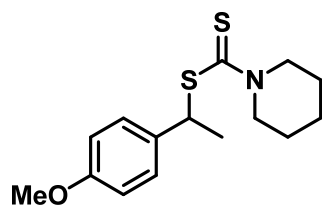

### 1-(4-Methoxyphenyl)ethylpiperidine-1-carbodithioate (4d)

The title compound was isolated by silica-gel column chromatography (eluent: petroleum ether /EtOAc = 160:1, v/v) as a light yellow oil liquid in 70% yield (206.8 mg). <sup>1</sup>H NMR (400 MHz, CDCl<sub>3</sub>) δ 7.35 (d, 2H, ArH, *J* = 8.4 Hz), 6.85 (d, 2H, ArH, *J* = 8.4 Hz), 5.26-5.21 (m, 1H, CH), 4.25 (br s, 2H, CH<sub>2</sub>), 3.83-3.79 (m, 5H, CH<sub>2</sub> and CH<sub>3</sub>), 1.77 (d, 3H, CH<sub>3</sub>, *J* = 7.2 Hz), 1.67 (br s, 6H, CH<sub>2</sub>). <sup>13</sup>C NMR (100 MHz, CDCl<sub>3</sub>) δ 194.8, 158.8, 134.1, 129.0, 113.9, 55.3, 52.5, 51.3, 50.5, 26.0, 25.5, 24.3, 22.2. HRMS (ESI) *m/z*: calcd for C<sub>15</sub>H<sub>22</sub>NOS<sub>2</sub><sup>+</sup> ([M+H]<sup>+</sup>), 296.1137; found, 296.1130.

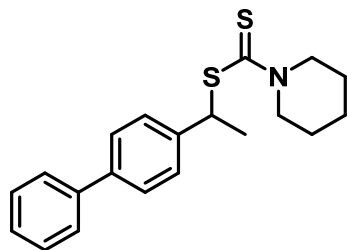

### 1-([1,1'-Biphenyl]-4-yl)ethylpiperidine-1-carbodithioate (4e)

The title compound was isolated by silica-gel column chromatography (eluent: petroleum ether /EtOAc = 160:1, v/v) as a light yellow oil liquid in 41% yield (140.0

mg).  $^1\text{H}$  NMR (400 MHz,  $\text{CDCl}_3$ )  $\delta$  7.56-7.48 (m, 6H, ArH), 7.39 (t, 2H, ArH,  $J = 7.6$  Hz), 7.30 (t, 1H, ArH,  $J = 7.2$  Hz), 5.37-5.32 (m, 1H, CH), 4.26 (br s, 2H,  $\text{CH}_2$ ), 3.81 (br s, 2H,  $\text{CH}_2$ ), 1.80 (d, 3H,  $\text{CH}_3$ ,  $J = 6.8$  Hz), 1.64-1.55 (m, 6H,  $\text{CH}_2$ ).  $^{13}\text{C}$  NMR (100 MHz,  $\text{CDCl}_3$ )  $\delta$  194.5, 141.4, 140.8, 140.3, 128.8, 128.4, 127.4, 127.3, 127.1, 52.7, 52.4, 50.7, 26.1, 25.6, 24.4, 22.2. HRMS (ESI)  $m/z$ : calcd for  $\text{C}_{20}\text{H}_{24}\text{NS}_2^+$  ( $[\text{M}+\text{H}]^+$ ), 342.1345; found, 342.1340.

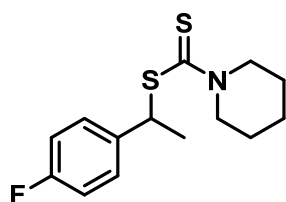

#### 1-(4-Fluorophenyl)ethylpiperidine-1-carbodithioate (4f)

The title compound was isolated by silica-gel column chromatography (eluent: petroleum ether /EtOAc = 160:1, v/v) as a light yellow oil liquid in 75% yield (212.6 mg).  $^1\text{H}$  NMR (400 MHz,  $\text{CDCl}_3$ )  $\delta$  7.34-7.31 (m, 2H, ArH), 6.92 (t, 2H, ArH,  $J = 8.8$  Hz), 5.23-5.18 (m, 1H, CH), 4.19 (br s, 2H,  $\text{CH}_2$ ), 3.76 (br s, 2H,  $\text{CH}_2$ ), 1.68 (d, 3H,  $\text{CH}_3$ ,  $J = 7.2$  Hz), 1.60-1.53 (m, 6H,  $\text{CH}_2$ ).  $^{13}\text{C}$  NMR (100 MHz,  $\text{CDCl}_3$ )  $\delta$  194.3, 163.1, 160.7, 138.2, 129.5, 115.4, 52.6, 51.3, 50.1, 26.0, 25.5, 24.3, 22.3.  $^{19}\text{F}$  NMR (376 MHz,  $\text{DMSO}-d_6$ )  $\delta$  115.1. HRMS (ESI)  $m/z$ : calcd for  $\text{C}_{14}\text{H}_{19}\text{FNS}_2^+$  ( $[\text{M}+\text{H}]^+$ ), 284.0937; found, 284.0932.

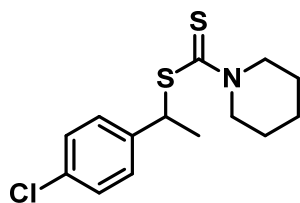

#### 1-(4-Chlorophenyl)ethylpiperidine-1-carbodithioate (4g)

The title compound was isolated by silica-gel column chromatography (eluent: petroleum ether /EtOAc = 160:1, v/v) as a light yellow oil liquid in 62% yield (185.9 mg).  $^1\text{H}$  NMR (400 MHz,  $\text{CDCl}_3$ )  $\delta$  7.37 (d, 2H, ArH,  $J = 8.4$  Hz), 7.27 (d, 2H, ArH,  $J = 8.4$  Hz), 5.29-5.24 (m, 1H, CH), 4.25 (br s, 2H,  $\text{CH}_2$ ), 3.82 (br s, 2H,  $\text{CH}_2$ ), 1.74 (d, 3H,  $\text{CH}_3$ ,  $J = 7.2$  Hz), 1.67-1.64 (m, 6H,  $\text{CH}_2$ ).  $^{13}\text{C}$  NMR (100 MHz,  $\text{CDCl}_3$ )  $\delta$  194.0,

141.1, 133.0, 129.3, 128.6, 52.7, 51.3, 50.1, 26.1, 25.5, 24.3, 22.1. HRMS (ESI)  $m/z$ : calcd for  $C_{14}H_{19}ClNS_2^+$  ( $[M+H]^+$ ), 300.0642; found, 300.0639.

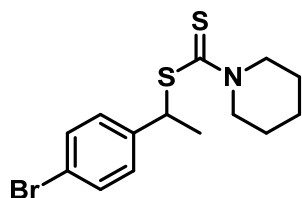

#### 1-(4-Bromophenyl)ethyl piperidine-1-carbodithioate (4h)

The title compound was isolated by silica-gel column chromatography (eluent: petroleum ether /EtOAc = 160:1, v/v) as a light yellow oil liquid in 69% yield (237.6 mg).  $^1H$  NMR (400 MHz,  $CDCl_3$ )  $\delta$  7.43 (d, 2H, ArH,  $J$  = 8.4 Hz), 7.31 (d, 2H, ArH,  $J$  = 8.8 Hz), 5.28-5.23 (m, 1H, CH), 4.25 (br s, 2H,  $CH_2$ ), 3.82 (br s, 2H,  $CH_2$ ), 1.73 (d, 3H,  $CH_3$ ,  $J$  = 7.2 Hz), 1.70-1.64 (m, 6H,  $CH_2$ ).  $^{13}C$  NMR (100 MHz,  $CDCl_3$ )  $\delta$  194.0, 141.7, 131.5, 129.6, 121.1, 52.7, 51.3, 50.1, 26.0, 25.5, 24.3, 22.0. HRMS (ESI)  $m/z$ : calcd for  $C_{14}H_{19}BrNS_2^+$  ( $[M+H]^+$ ), 344.0137; found, 344.0134.

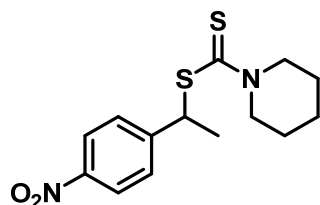

#### 1-(4-Nitrophenyl)ethyl piperidine-1-carbodithioate (4i)

The title compound was isolated by silica-gel column chromatography (eluent: petroleum ether /EtOAc = 100/1, v/v) as a light yellow oily liquid in 82% yield (254.6 mg).  $^1H$  NMR (400 MHz,  $CDCl_3$ )  $\delta$  8.17 (d, 2H, ArH,  $J$  = 8.4 Hz), 7.62 (d, 2H, ArH,  $J$  = 8.4 Hz), 5.42-5.37 (m, 1H, CH), 4.25 (d, 2H,  $CH_2$ ,  $J$  = 36.0 Hz), 3.85 (d, 2H,  $CH_2$ ,  $J$  = 18.4 Hz), 1.76 (d, 3H,  $CH_3$ ,  $J$  = 7.2 Hz), 1.69 (s, 6H,  $CH_2$ ).  $^{13}C$  NMR (100 Hz,  $CDCl_3$ )  $\delta$  193.1, 150.8, 146.9, 128.8, 123.7, 52.9, 51.5, 49.9, 26.1, 25.4, 24.2, 21.8. HRMS (ESI)  $m/z$ : calcd for  $C_{14}H_{19}N_2O_2S_2^+$  ( $[M+H]^+$ ), 311.0882; found, 311.0875.

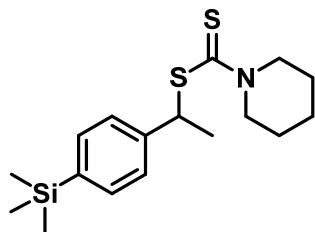

#### 1-(4-(Trimethylsilyl)phenyl)ethyl piperidine-1-carbodithioate (4j)

The title compound was isolated by silica-gel column chromatography (eluent: petroleum ether /EtOAc = 100/1, v/v) as a yellow oil liquid in 72% yield (243.1 mg).

$^1\text{H}$  NMR (400 MHz,  $\text{CDCl}_3$ )  $\delta$  7.340 (d, 2H, ArH,  $J$  = 8.0 Hz), 7.33 (d, 2H, ArH,  $J$  = 8.0 Hz), 5.20 (m, 1H, CH), 4.18 (br s, 2H,  $\text{CH}_2$ ), 3.74 (br s, 2H,  $\text{CH}_2$ ), 1.70 (d, 3H,  $\text{CH}_3$ ,  $J$  = 6.8 Hz), 1.59-1.55 (m, 6H,  $\text{CH}_2$ ), 0.17 (s, 9H,  $\text{CH}_3$ ).  $^{13}\text{C}$  NMR (100 MHz,  $\text{CDCl}_3$ )  $\delta$  195.7, 143.7, 140.5, 134.7, 128.3, 53.7, 52.3, 52.0, 27.1, 26.5, 25.4, 23.1, 0.0. HRMS (ESI)  $m/z$ : calcd for  $\text{C}_{17}\text{H}_{28}\text{NS}_2\text{Si}^+$  ( $[\text{M}+\text{H}]^+$ ), 338.1427; found, 338.1431.

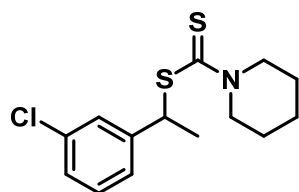

#### 1-(3-Chlorophenyl)ethylpiperidine-1-carbodithioate (4k)

The title compound was isolated by silica-gel column chromatography (eluent: petroleum ether /EtOAc = 160:1, v/v) as a light yellow oil liquid in 40% yield (120.0 mg).

$^1\text{H}$  NMR (400 MHz,  $\text{CDCl}_3$ )  $\delta$  7.42 (t, 1H, ArH,  $J$  = 1.6 Hz), 7.32 (td, 1H, ArH,  $J_1$  = 1.6 Hz,  $J_2$  = 7.2 Hz), 7.26-7.19 (m, 2H, ArH), 5.30-5.25 (m, 1H, CH), 4.26 (br s, 2H,  $\text{CH}_2$ ), 3.83 (br s, 2H,  $\text{CH}_2$ ), 1.74 (d, 3H,  $\text{CH}_3$ ,  $J$  = 7.2 Hz), 1.68-1.59 (m, 6H,  $\text{CH}_2$ ).  $^{13}\text{C}$  NMR (100 MHz,  $\text{CDCl}_3$ )  $\delta$  192.9, 143.6, 133.1, 128.6, 126.9, 126.4, 125.1, 51.7, 50.3, 49.2, 25.0, 24.4, 23.2, 21.0. HRMS (ESI)  $m/z$ : calcd for  $\text{C}_{14}\text{H}_{19}\text{ClNS}_2^+$  ( $[\text{M}+\text{H}]^+$ ), 300.0642; found, 300.0637.

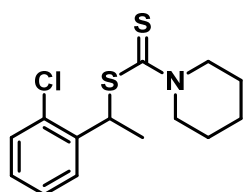

#### 1-(2-Chlorophenyl)ethylpiperidine-1-carbodithioate (4l)

The title compound was isolated by silica-gel column chromatography (eluent: petroleum ether /EtOAc = 160:1, v/v) as a light yellow oil liquid in 44% yield (131.9 mg). <sup>1</sup>H NMR (400 MHz, CDCl<sub>3</sub>) δ 7.48 (d, 1H, ArH, *J* = 6.4 Hz), 7.37 (d, 1H, ArH, *J* = 7.6 Hz), 7.25-7.16 (m, 2H, ArH), 5.64-5.59 (m, 1H, CH), 4.24 (br s, 2H, CH<sub>2</sub>), 3.84 (br s, 2H, CH<sub>2</sub>), 1.77 (d, 3H, CH<sub>3</sub>, *J* = 7.2 Hz), 1.72-1.62 (m, 6H, CH<sub>2</sub>). <sup>13</sup>C NMR (100 MHz, CDCl<sub>3</sub>) δ 194.2, 139.5, 133.9, 129.9, 128.9, 128.5, 126.9, 52.7, 51.4, 48.0, 26.1, 25.5, 24.3, 21.3. HRMS (ESI) *m/z*: calcd for C<sub>14</sub>H<sub>19</sub>ClNS<sub>2</sub><sup>+</sup> ([M+H]<sup>+</sup>), 300.0642; found, 300.0634.

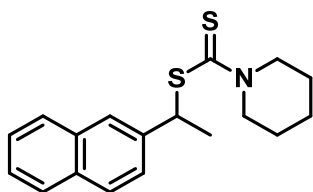

#### 1-(Naphthalen-2-yl)ethylpiperidine-1-carbodithioate (4m)

The title compound was isolated by silica-gel column chromatography (eluent: petroleum ether /EtOAc = 160:1, v/v) as a light yellow oil liquid in 53% yield (167.2 mg). <sup>1</sup>H NMR (400 MHz, CDCl<sub>3</sub>) δ 7.88 (s, 1H, ArH), 7.82-7.79 (m, 3H, ArH), 7.55 (dd, 1H, ArH, *J*<sub>1</sub> = 1.6 Hz, *J*<sub>2</sub> = 8.8 Hz), 7.48-7.42 (m, 2H, ArH), 5.50-5.45 (m, 1H, CH), 4.28 (br s, 2H, CH<sub>2</sub>), 3.83 (br s, 2H, CH<sub>2</sub>), 1.88 (d, 3H, CH<sub>3</sub>, *J* = 7.2 Hz), 1.67-1.62 (m, 6H, CH<sub>2</sub>). <sup>13</sup>C NMR (100 MHz, CDCl<sub>3</sub>) δ 194.5, 139.6, 133.3, 132.7, 128.3, 128.0, 127.6, 126.4, 126.3, 126.2, 125.9, 52.7, 51.3, 51.1, 26.0, 25.5, 24.3, 22.0. HRMS (ESI) *m/z*: calcd for C<sub>18</sub>H<sub>22</sub>NS<sub>2</sub><sup>+</sup> ([M+H]<sup>+</sup>), 316.1188; found, 316.1186.

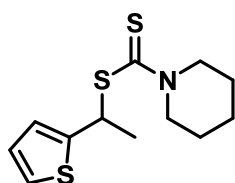

#### 1-(Thiophen-2-yl)ethyl piperidine-1-carbodithioate (4n)

The title compound was isolated by silica-gel column chromatography (eluent: petroleum ether /EtOAc = 100/1, v/v) as a yellow oil liquid in 81% yield (219.9 mg).

$^1\text{H}$  NMR (400 MHz,  $\text{CDCl}_3$ )  $\delta$  7.18 (d, 1H, ArH,  $J = 5.2$  Hz), 7.06 (d, 1H, ArH,  $J_1 = 3.6$  Hz), 6.92 (dd, 1H, ArH,  $J_1 = 5.2$  Hz,  $J_2 = 3.6$  Hz), 5.61-5.55 (m, 1H,  $\text{CH}_2$ ), 4.26 (br s, 2H,  $\text{CH}_2$ ), 3.81 (br s, 2H,  $\text{CH}_2$ ), 1.85 (d, 3H,  $\text{CH}_3$ ,  $J = 6.8$  Hz), 1.70-1.63 (m, 6H,  $\text{CH}_2$ ).  $^{13}\text{C}$  NMR (100 MHz,  $\text{CDCl}_3$ )  $\delta$  194.0, 145.9, 126.7, 125.2, 124.7, 52.7, 51.3, 46.5, 26.0, 25.5, 24.3, 23.2. HRMS (ESI)  $m/z$ : calcd for  $\text{C}_{12}\text{H}_{18}\text{NS}_3^+$  ( $[\text{M}+\text{H}]^+$ ), 272.0596; found, 272.0596.

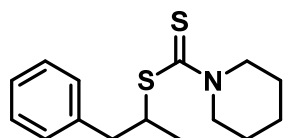

#### 1-Phenylpropan-2-ylpiperidine-1-carbodithioate (4o)

The title compound was isolated by silica-gel column chromatography (eluent: petroleum ether /EtOAc = 160:1, v/v) as a light yellow oil liquid in 79% yield (220.8 mg).  $^1\text{H}$  NMR (400 MHz,  $\text{CDCl}_3$ )  $\delta$  7.24-7.19 (m, 4H, ArH), 7.17-7.15 (m, 1H, ArH), 4.24-4.15 (m, 3H, CH and  $\text{CH}_2$ ), 3.81 (br s, 2H,  $\text{CH}_2$ ), 3.30-3.25 (dd, 1H, CH,  $J_1 = 4.8$  Hz,  $J_2 = 13.6$  Hz), 2.64-2.58 (m, 1H, CH), 1.71-1.63 (m, 6H,  $\text{CH}_2$ ), 1.25 (d, 3H,  $\text{CH}_3$ ,  $J = 7.2$  Hz).  $^{13}\text{C}$  NMR (100 MHz,  $\text{CDCl}_3$ )  $\delta$  195.1, 139.3, 129.4, 128.2, 126.4, 52.5, 51.4, 48.0, 43.0, 26.0, 25.5, 24.4, 19.1. HRMS (ESI)  $m/z$ : calcd for  $\text{C}_{15}\text{H}_{22}\text{NS}_2^+$  ( $[\text{M}+\text{H}]^+$ ), 280.1188; found, 280.1181.

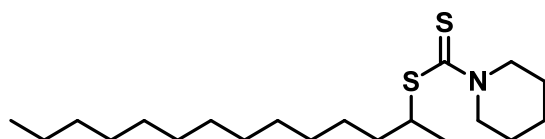

#### Tetradecan-2-yl piperidine-1-carbodithioate (4p)

The title compound was isolated by silica-gel column chromatography (eluent: petroleum ether /EtOAc = 160:1, v/v) as a light yellow oil liquid in 67% yield (239.6 mg).  $^1\text{H}$  NMR (400 MHz,  $\text{CDCl}_3$ )  $\delta$  4.21 (br s, 2H,  $\text{CH}_2$ ), 4.00-3.91 (m, 1H, CH), 3.81 (br s, 2H,  $\text{CH}_2$ ), 1.62 (s, 6H,  $\text{CH}_2$ ), 1.33 (d, 5H,  $\text{CH}_2$  and  $\text{CH}_3$ ,  $J = 6.8$  Hz), 1.19 (s, 20H,  $\text{CH}_2$ ), .081 (t, 3H,  $\text{CH}_3$ ,  $J = 7.2$  Hz).  $^{13}\text{C}$  NMR (100 MHz,  $\text{CDCl}_3$ )  $\delta$  195.7, 52.4, 51.3, 47.6, 36.3, 31.9, 29.7 (2), 29.6, 29.4, 27.1, 25.9, 25.5, 24.4, 22.7, 21.0, 14.1. HRMS

(ESI)  $m/z$ : calcd for  $C_{20}H_{40}NS_2^+$  ( $[M+H]^+$ ), 358.2597; found, 358.2589.

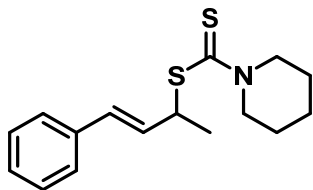

**(E)-4-Phenylbut-3-en-2-yl piperidine-1-carbodithioate (4q)**

The title compound was isolated by silica-gel column chromatography (eluent: petroleum ether /EtOAc = 100/1, v/v) as a yellow oil liquid in 71% yield (206.9 mg).  $^1H$  NMR (400 MHz,  $CDCl_3$ )  $\delta$  7.38 (d, 2H, ArH,  $J = 7.6$  Hz), 7.30 (t, 2H, ArH,  $J = 7.2$  Hz), 7.21 (t, 1H, ArH,  $J = 7.2$  Hz), 6.65 (d, 1H, CH,  $J = 16.0$  Hz), 6.39 (dd, 1H, CH,  $J_1 = 15.6$  Hz,  $J_2 = 6.8$  Hz), 4.97-4.90 (m, 1H, CH), 4.29 (br s, 2H,  $CH_2$ ), 3.87 (br s, 2H,  $CH_2$ ), 1.69-1.67 (s, 6H,  $CH_2$ ), 1.63 (d, 3H,  $CH_3$ ,  $J = 7.2$  Hz).  $^{13}C$  NMR (100 MHz,  $CDCl_3$ )  $\delta$  194.5, 136.9, 130.5, 130.1, 128.5, 127.5, 126.4, 52.7, 51.3, 48.7, 26.0, 25.5, 24.3, 19.8. HRMS (ESI)  $m/z$ : calcd for  $C_{16}H_{22}NS_2^+$  ( $[M+H]^+$ ), 292.1188; found, 292.1188.

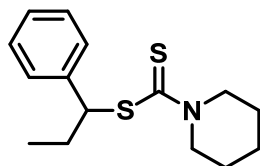

**1-phenylpropyl piperidine-1-carbodithioate (4r)**

The title compound was isolated by silica-gel column chromatography (eluent: petroleum ether /EtOAc = 100/1, v/v) as a yellow oil liquid in 54% yield (150.9 mg).  $^1H$  NMR (400 MHz,  $CDCl_3$ )  $\delta$  7.38 (d, 2H, ArH,  $J = 7.2$  Hz), 7.31 (t, 2H, ArH,  $J = 7.6$  Hz), 7.24 (d, 1H, ArH,  $J = 7.6$  Hz), 5.08 (dd, 1H, CH,  $J_1 = 9.6$  Hz,  $J_2 = 5.6$  Hz), 4.26 (br s, 2H,  $CH_2$ ), 3.86 (br s, 2H,  $CH_2$ ), 2.30-2.19 (m, 1H,  $CH_2$ ), 2.05-1.94 (m, 1H,  $CH_2$ ), 1.67-1.64 (m, 6H,  $CH_2$ ), 0.92 (t, 3H,  $CH_3$ ,  $J = 7.6$  Hz).  $^{13}C$  NMR (100 MHz,  $CDCl_3$ )  $\delta$  194.8, 141.0, 128.4, 127.3, 57.5, 52.7, 51.2, 29.6, 26.0, 25.4, 24.3, 12.3. HRMS (ESI)  $m/z$ : calcd for  $C_{15}H_{22}NS_2^+$  ( $[M+H]^+$ ), 280.1188; found, 280.1193.

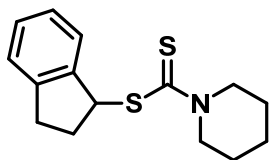

#### 2,3-Dihydro-1H-inden-1-yl piperidine-1-carbodithioate (4s)

The title compound was isolated by silica-gel column chromatography (eluent: petroleum ether /EtOAc = 170/1, v/v) as a light yellow oily liquid in 56% yield (155.4 mg).  $^1\text{H}$  NMR (400 MHz,  $\text{CDCl}_3$ )  $\delta$  7.43 (d, 1H, ArH,  $J$  = 6.8 Hz), 7.23-7.16 (m, 3H, ArH), 7.59-7.56 (m, 1H, CH), 4.32 (d, 2H,  $\text{CH}_2$ ,  $J$  = 36.0 Hz), 3.86 (s, 2H,  $\text{CH}_2$ ), 3.09-3.01 (m, 1H,  $\text{CH}_2$ ), 2.96-2.89 (m, 1H,  $\text{CH}_2$ ), 2.82-2.72 (m, 1H,  $\text{CH}_2$ ), 2.35-2.27 (m, 1H,  $\text{CH}_2$ ), 1.71 (s, 6H,  $\text{CH}_2$ ).  $^{13}\text{C}$  NMR (100 MHz,  $\text{CDCl}_3$ )  $\delta$  195.6, 144.5, 141.3, 128.0, 126.7, 125.3, 124.8, 55.8, 52.7, 51.5, 34.4, 30.8, 26.1, 25.5, 24.3. HRMS (ESI)  $m/z$ : calcd for  $\text{C}_{15}\text{H}_{20}\text{NS}_2^+$  ( $[\text{M}+\text{H}]^+$ ), 278.1032; found, 278.1028.

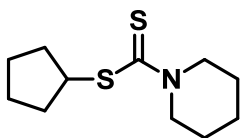

#### Cyclopentyl piperidine-1-carbodithioate (4t)

The title compound was isolated by silica-gel column chromatography (eluent: petroleum ether /EtOAc = 160:1, v/v) as a light yellow oil liquid in 32% yield (73.4 mg).  $^1\text{H}$  NMR (400 MHz,  $\text{CDCl}_3$ )  $\delta$  4.28 (br s, 2H,  $\text{CH}_2$ ), 4.19-4.12 (m, 1H, CH), 3.86 (t, 2H,  $\text{CH}_2$ ,  $J$  = 6.8 Hz), 2.29-2.20 (m, 2H,  $\text{CH}_2$ ), 1.72-1.63 (m, 12H,  $\text{CH}_2$ ).  $^{13}\text{C}$  NMR (100 MHz,  $\text{CDCl}_3$ )  $\delta$  195.3, 51.3, 50.3, 49.0, 32.0, 24.9, 24.4, 24.0, 23.3. HRMS (ESI)  $m/z$ : calcd for  $\text{C}_{11}\text{H}_{19}\text{NNaS}_2^+$  ( $[\text{M}+\text{Na}]^+$ ), 252.0851; found, 252.0855.

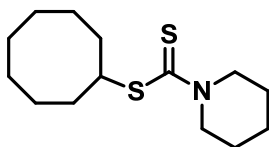

#### Cyclooctyl piperidine-1-carbodithioate (4u)

The title compound was isolated by silica-gel column chromatography (eluent: petroleum ether /EtOAc = 170/1, v/v) as a light yellow oily liquid in 52% yield (141.2

mg).  $^1\text{H}$  NMR (400 MHz,  $\text{CDCl}_3$ )  $\delta$  4.21 (s, 2H,  $\text{CH}_2$ ), 4.15-4.09 (m, 1H, CH), 3.81 (s, 2H,  $\text{CH}_2$ ), 2.08-2.00 (m, 2H,  $\text{CH}_2$ ), 1.78-1.69 (m, 2H,  $\text{CH}_2$ ), 1.62-1.47 (m, 16H,  $\text{CH}_2$ ).  $^{13}\text{C}$  NMR (100 MHz,  $\text{CDCl}_3$ )  $\delta$  195.8, 52.4, 51.7, 51.3, 32.4, 27.1, 26.0, 25.6, 24.4. HRMS (ESI)  $m/z$ : calcd for  $\text{C}_{14}\text{H}_{26}\text{NS}_2^+$  ( $[\text{M}+\text{H}]^+$ ), 272.1501; found, 272.1493.

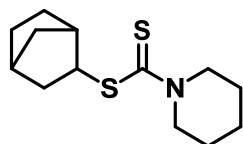

#### Bicyclo[2.2.1]heptan-2-yl piperidine-1-carbodithioate (4v)

The title compound was isolated by silica-gel column chromatography (eluent: petroleum ether /EtOAc = 160:1, v/v) as a light yellow oil liquid in 28% yield (71.5 mg).  $^1\text{H}$  NMR (400 MHz,  $\text{CDCl}_3$ )  $\delta$  4.27 (d, 2H,  $\text{CH}_2$ ,  $J = 47.6$  Hz), 3.88-3.77 (m, 3H, CH and  $\text{CH}_2$ ), 2.46 (t, 1H,  $\text{CH}_2$ ,  $J = 4.4$  Hz), 2.31 (t, 1H,  $\text{CH}_2$ ,  $J = 3.6$  Hz), 1.92-1.86 (m, 1H, CH), 1.73-1.59 (m, 7H, CH and  $\text{CH}_2$ ), 1.57-1.44 (m, 4H,  $\text{CH}_2$ ), 1.26-1.19 (m, 2H,  $\text{CH}_2$ ).  $^{13}\text{C}$  NMR (100 MHz,  $\text{CDCl}_3$ )  $\delta$  196.2, 52.6, 52.2, 51.3, 43.6, 37.4, 36.6, 36.3, 28.9, 28.4, 26.0, 25.4, 24.3. HRMS (ESI)  $m/z$ : calcd for  $\text{C}_{13}\text{H}_{22}\text{NS}_2^+$  ( $[\text{M}+\text{H}]^+$ ), 256.1188; found, 256.1177.

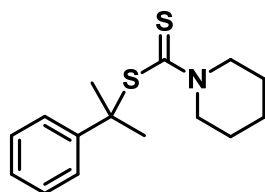

#### 2-Phenylpropan-2-yl piperidine-1-carbodithioate (4w)<sup>[6]</sup>

The title compound was isolated by silica-gel column chromatography (eluent: petroleum ether /EtOAc = 100/1, v/v) as a yellow oil liquid in 85% yield (237.5 mg).  $^1\text{H}$  NMR (400 MHz,  $\text{CDCl}_3$ )  $\delta$  7.54 (d, 2H, ArH,  $J = 7.6$  Hz), 7.30 (t, 2H, ArH,  $J = 7.6$  Hz), 7.19 (t, 1H, ArH,  $J = 6.8$  Hz), 3.99 (br s, 4H,  $\text{CH}_2$ ), 2.01 (s, 6H,  $\text{CH}_3$ ), 1.66-1.56 (m, 6H,  $\text{CH}_2$ ).  $^{13}\text{C}$  NMR (100 MHz,  $\text{CDCl}_3$ )  $\delta$  193.6, 145.8, 127.9, 127.0, 126.5, 55.9, 50.9, 29.5, 25.8, 24.3.

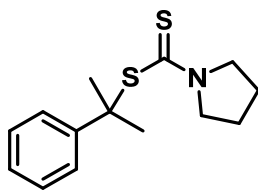

#### 2-Phenylpropan-2-yl pyrrolidine-1-carbodithioate (4x)

The title compound was isolated by silica-gel column chromatography (eluent: petroleum ether /EtOAc = 100/1, v/v) as a yellow oil liquid in 62% yield (164.6 mg).  $^1\text{H}$  NMR (400 MHz,  $\text{CDCl}_3$ )  $\delta$  7.56 (d, 2H, ArH,  $J$  = 8.0 Hz), 7.32 (t, 2H, ArH,  $J$  = 7.6 Hz), 7.21 (t, 1H, ArH,  $J$  = 7.6 Hz), 3.79 (t, 2H,  $\text{CH}_2$ ,  $J$  = 6.8 Hz), 3.59 (t, 2H,  $\text{CH}_2$ ,  $J$  = 6.8 Hz), 2.04 (s, 6H,  $\text{CH}_3$ ), 2.03-1.97 (m, 2H,  $\text{CH}_2$ ), 1.92-1.85 (m, 2H,  $\text{CH}_2$ ).  $^{13}\text{C}$  NMR (100 MHz,  $\text{CDCl}_3$ )  $\delta$  191.0, 145.5, 127.9, 127.0, 126.6, 55.7, 53.6, 50.8, 29.1, 26.3, 24.1. HRMS (ESI)  $m/z$ : calcd for  $\text{C}_{14}\text{H}_{19}\text{NNaS}_2^+$  ( $[\text{M}+\text{Na}]^+$ ), 288.0851; found, 288.0853.

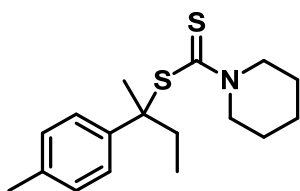

#### 2-(p-tolyl)butan-2-yl piperidine-1-carbodithioate (4y)

The title compound was isolated by silica-gel column chromatography (eluent: petroleum ether /EtOAc = 100/1, v/v) as a yellow oil liquid in 71% yield (218.3 mg).  $^1\text{H}$  NMR (400 MHz,  $\text{DMSO}-d_6$ )  $\delta$  7.34 (d, 2H, ArH,  $J$  = 8.0 Hz), 7.10 (d, 2H, ArH,  $J$  = 8.0 Hz), 3.97 (br s, 4H,  $\text{CH}_2$ ), 2.48-2.41 (m, 1H,  $\text{CH}_2$ ), 2.26 (s, 3H,  $\text{CH}_3$ ), 2.10-2.04 (m, 1H,  $\text{CH}_2$ ), 2.02 (s, 3H,  $\text{CH}_3$ ), 1.64-1.58 (m, 2H,  $\text{CH}_2$ ), 1.52-1.48 (m, 4H,  $\text{CH}_2$ ), 0.72 (t, 3H,  $\text{CH}_3$ ,  $J$  = 7.2 Hz).  $^{13}\text{C}$  NMR (100 MHz,  $\text{DMSO}-d_6$ )  $\delta$  192.2, 141.1, 135.7, 128.8, 127.7, 60.2, 50.8, 34.5, 26.1, 24.4, 24.0, 21.0, 9.2. HRMS (ESI)  $m/z$ : calcd for  $\text{C}_{17}\text{H}_{25}\text{NNaS}_2^+$  ( $[\text{M}+\text{Na}]^+$ ), 330.1321; found, 330.1329.

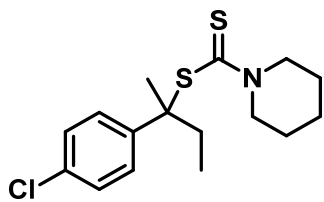

#### 2-(4-Chlorophenyl)butan-2-yl piperidine-1-carbodithioate (4z)

The title compound was isolated by silica-gel column chromatography (eluent: petroleum ether /EtOAc = 100/1, v/v) as a white wax in 82% yield (268.9 mg).  $^1\text{H}$  NMR (400 MHz,  $\text{CDCl}_3$ )  $\delta$  7.44 (d, 2H, ArH,  $J=8.8$  Hz), 7.25 (d, 2H, ArH,  $J=8.4$  Hz), 4.00 (br s, 4H,  $\text{CH}_2$ ), 2.39-2.30 (m, 1H,  $\text{CH}_2$ ), 2.08 (s, 3H,  $\text{CH}_3$ ), 2.06-1.97 (m, 1H,  $\text{CH}_2$ ), 1.67-1.61 (m, 6H,  $\text{CH}_2$ ), 0.81 (t, 3H,  $\text{CH}_3$ ,  $J=7.2$  Hz).  $^{13}\text{C}$  NMR (100 MHz,  $\text{CDCl}_3$ )  $\delta$  192.9, 142.9, 131.9, 129.1, 127.8, 59.6, 51.0, 35.5, 25.8, 24.3, 8.7. HRMS (ESI)  $m/z$ : calcd for  $\text{C}_{16}\text{H}_{22}\text{NNaS}_2^+$  ( $[\text{M}+\text{Na}]^+$ ), 350.0774; found, 350.0777.

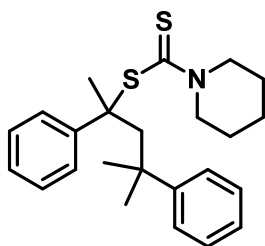

#### 4-Methyl-2,4-diphenylpentan-2-yl piperidine-1-carbodithioate (4aa)

The title compound was isolated by silica-gel column chromatography (eluent: petroleum ether /EtOAc = 100/1, v/v) as a yellow oil liquid in 74% yield (294.3 mg).  $^1\text{H}$  NMR (400 MHz,  $\text{CDCl}_3$ )  $\delta$  7.46 (d, 2H, ArH,  $J=7.2$  Hz), 7.34-7.19 (m, 7H, ArH), 7.14 (t, 1H, ArH,  $J=7.2$  Hz), 3.97 (br s, 4H,  $\text{CH}_2$ ), 3.68 (d, 1H,  $\text{CH}_2$ ,  $J=14.4$  Hz), 2.58 (d, 1H,  $\text{CH}_2$ ,  $J=14.4$  Hz), 1.82 (s, 3H,  $\text{CH}_3$ ), 1.63-1.56 (m, 6H,  $\text{CH}_2$ ), 1.22 (s, 3H,  $\text{CH}_3$ ), 0.90 (s, 3H,  $\text{CH}_3$ ).  $^{13}\text{C}$  NMR (100 MHz,  $\text{CDCl}_3$ )  $\delta$  193.6, 149.1, 144.6, 127.9, 127.8, 127.8, 126.9, 126.3, 125.5, 62.6, 53.1, 50.8, 39.1, 34.0, 28.4, 25.8, 24.4, 23.6. HRMS (ESI)  $m/z$ : calcd for  $\text{C}_{24}\text{H}_{31}\text{NNaS}_2^+$  ( $[\text{M}+\text{Na}]^+$ ), 420.1790; found, 420.1791.

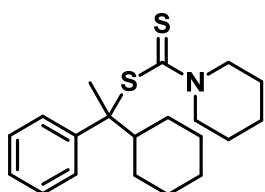

#### 1-Cyclohexyl-1-phenylethyl piperidine-1-carbodithioate (4ab)

The title compound was isolated by silica-gel column chromatography (eluent: petroleum ether /EtOAc = 100/1, v/v) as a yellow oil liquid in 83% yield (288.5 mg).

$^1\text{H}$  NMR (400 MHz,  $\text{CDCl}_3$ )  $\delta$  7.47 (d 2H, ArH,  $J = 7.2$  Hz), 7.27 (t, 2H, ArH,  $J = 8.0$  Hz), 7.16 (t, 1H, ArH,  $J = 7.2$  Hz), 4.02-3.96 (m, 4H,  $\text{CH}_2$ ), 2.18 (s, 3H,  $\text{CH}_3$ ), 2.05 (d, 1H,  $\text{CH}_2$ ,  $J = 12.8$  Hz), 1.95 (t, 1H,  $\text{CH}_2$ ,  $J = 11.6$  Hz), 1.81-1.75 (m, 1H,  $\text{CH}_2$ ), 1.65-1.59 (m, 7H,  $\text{CH}_2$ ), 1.33-1.21 (m, 3H,  $\text{CH}_2$ ), 1.16-1.04 (m, 3H,  $\text{CH}_2$ ), 0.99-0.90 (m, 1H,  $\text{CH}_2$ ).  $^{13}\text{C}$  NMR (100 MHz,  $\text{CDCl}_3$ )  $\delta$  193.5, 144.1, 128.0, 127.4, 125.9, 64.3, 51.1, 50.4, 28.9, 28.0, 26.9, 26.5, 25.8, 24.4, 20.6. HRMS (ESI)  $m/z$ : calcd for  $\text{C}_{20}\text{H}_{29}\text{NNaS}_2^+$  ( $[\text{M}+\text{Na}]^+$ ), 370.1634; found, 370.1637.

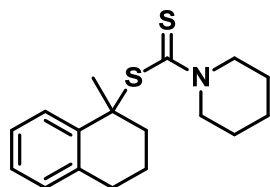

#### 1-Methyl-1,2,3,4-tetrahydronaphthalen-1-yl piperidine-1-carbodithioate (4ac)

The title compound was isolated by silica-gel column chromatography (eluent: petroleum ether /EtOAc = 100/1, v/v) as a yellow oil liquid in 70% yield (213.9 mg).

$^1\text{H}$  NMR (400 MHz,  $\text{CDCl}_3$ )  $\delta$  7.42 (d 1H, ArH,  $J = 7.6$  Hz), 7.10-7.04 (m, 2H, ArH), 6.98 (d, 1H, ArH,  $J = 7.2$  Hz), 3.96 (br s, 4H,  $\text{CH}_2$ ), 3.58-3.51 (m, 1H,  $\text{CH}_2$ ), 2.93-2.82 (m, 1H,  $\text{CH}_2$ ), 2.72-2.66 (m, 1H,  $\text{CH}_2$ ), 1.99-1.93 (m, 1H,  $\text{CH}_2$ ), 1.91 (s, 3H,  $\text{CH}_3$ ), 1.80-1.72 (m, 2H,  $\text{CH}_2$ ), 1.59-1.54 (m, 6H,  $\text{CH}_2$ ).  $^{13}\text{C}$  NMR (100 MHz,  $\text{CDCl}_3$ ):  $\delta$  194.0, 140.7, 138.5, 129.0, 128.1, 126.8, 126.0, 57.5, 50.9, 34.7, 30.1, 29.9, 25.9, 24.4, 20.4. HRMS (ESI)  $m/z$ : calcd for  $\text{C}_{17}\text{H}_{22}\text{NS}_2^+$  ( $\text{M}^+$ ), 304.1188; found, 304.1191.

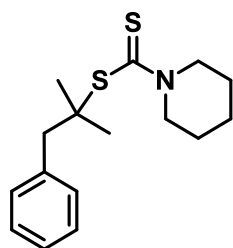

### 2-Methyl-1-phenylpropan-2-yl piperidine-1-carbodithioate (4ad)

The title compound was isolated by silica-gel column chromatography (eluent: petroleum ether /EtOAc = 100/1, v/v) as a yellow oil liquid in 52% yield (152.6 mg). <sup>1</sup>H NMR (400 MHz, CDCl<sub>3</sub>) δ 7.27-7.20 (m, 5H, ArH), 4.07 (br s, 4H, CH<sub>2</sub>), 3.54 (s, 2H, CH<sub>2</sub>), 1.72-1.65 (m, 6H, CH<sub>2</sub>), 1.57 (s, 6H, CH<sub>3</sub>). <sup>13</sup>C NMR (100 MHz, CDCl<sub>3</sub>) δ 194.7, 138.1, 131.1, 127.6, 126.3, 55.3, 51.0, 44.6, 27.8, 25.9, 24.4. HRMS (ESI) m/z: calcd for C<sub>16</sub>H<sub>24</sub>NS<sub>2</sub><sup>+</sup> ([M+H]<sup>+</sup>), 294.1345; found, 294.1346.

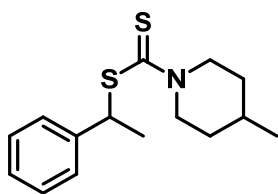

### 1-Phenylethyl-4-methylpiperidine-1-carbodithioate (4ae)

The title compound was isolated by silica-gel column chromatography (eluent: petroleum ether /EtOAc = 160:1, v/v) as a light yellow oil liquid in 60% yield (167.7 mg). <sup>1</sup>H NMR (400 MHz, CDCl<sub>3</sub>) δ 7.43 (d, 2H, ArH, *J* = 7.2 Hz), 7.32 (t, 2H, ArH, *J* = 7.2 Hz), 7.25-7.23 (m, 1H, ArH), 5.52 (br s, 1H, CH<sub>2</sub>), 5.31-5.26 (m, 1H, CH), 4.55 (br s, 1H, CH<sub>2</sub>), 3.07 (t, 2H, CH<sub>2</sub>, *J* = 10.8 Hz), 1.79-1.65 (m, 6H, CH<sub>3</sub> and CH<sub>2</sub> and CH), 1.33-1.16 (m, 2H, CH<sub>2</sub>), 0.96 (s, 3H, CH<sub>3</sub>). <sup>13</sup>C NMR (100 MHz, CDCl<sub>3</sub>) δ 194.7, 128.5, 127.9, 127.4, 51.9, 51.0, 50.4, 34.0, 33.6, 31.0, 22.2, 21.3. HRMS (ESI) m/z: calcd for C<sub>15</sub>H<sub>22</sub>NS<sub>2</sub><sup>+</sup> ([M+H]<sup>+</sup>), 280.1188; found, 280.1184.

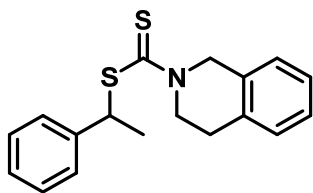

### 1-Phenylethyl-3,4-dihydroisoquinoline-2(1H)-carbodithioate (4af)

The title compound was isolated by silica-gel column chromatography (eluent: petroleum ether /EtOAc = 160:1, v/v) as a light yellow oil liquid in 81% yield (253.9 mg). <sup>1</sup>H NMR (400 MHz, DMSO-*d*<sub>6</sub>) δ 7.47 (d, 2H, ArH, *J* = 7.6 Hz), 7.38 (t, 2H, ArH, *J* = 7.2 Hz), 7.33-7.26 (m, 5H, ArH), 5.31-5.24 (m, 2H, CH<sub>2</sub>), 5.07-4.96 (m, 1H, CH),

4.35 (br s, 1H, CH<sub>2</sub>), 4.02 (br s, 1H, CH<sub>2</sub>), 2.97 (t, 2H, CH<sub>2</sub>,  $J = 5.6$  Hz), 1.77 (d, 3H, CH<sub>3</sub>,  $J = 6.8$  Hz). <sup>13</sup>C NMR (100 MHz, DMSO-*d*<sub>6</sub>)  $\delta$  194.1, 142.2, 135.4, 135.1, 129.0, 128.3, 128.2, 127.9, 127.6, 127.5, 126.9, 53.5, 51.4, 50.5, 50.1, 48.2, 28.7, 28.2, 22.3. HRMS (ESI)  $m/z$ : calcd for C<sub>18</sub>H<sub>20</sub>NS<sub>2</sub><sup>+</sup> ([M+H]<sup>+</sup>), 314.1032; found, 314.1036.

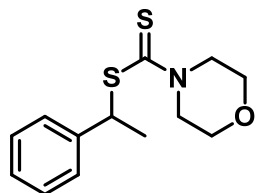

#### 1-Phenylethylmorpholine-4-carbodithioate (4ag)<sup>[5]</sup>

The title compound was isolated by silica-gel column chromatography (eluent: petroleum ether /EtOAc = 40:1, v/v) as a light yellow oil liquid in 72% yield (192.5 mg). <sup>1</sup>H NMR (400 MHz, DMSO-*d*<sub>6</sub>)  $\delta$  7.42 (d, 2H, ArH,  $J = 7.6$  Hz), 7.35 (t, 2H, ArH,  $J = 7.2$  Hz), 7.28 (t, 1H, ArH,  $J = 7.2$  Hz), 5.21-5.16 (m, 1H, CH), 4.22 (br s, 2H, CH<sub>2</sub>), 3.88 (br s, 2H, CH<sub>2</sub>), 3.64 (br s, 4H, CH<sub>2</sub>), 1.72 (d, 3H, CH<sub>3</sub>,  $J = 7.2$  Hz). <sup>13</sup>C NMR (100 MHz, DMSO-*d*<sub>6</sub>)  $\delta$  194.8, 142.2, 129.0, 128.2, 127.9, 66.0, 51.3, 50.8, 50.6, 22.4.

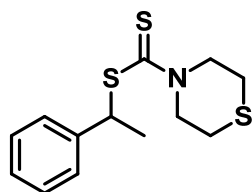

#### 1-Phenylethyl thiomorpholine-4-carbodithioate (4ah)

The title compound was isolated by silica-gel column chromatography (eluent: petroleum ether /EtOAc = 170/1, v/v) as a light yellow oily liquid in 71% yield (201.3 mg). <sup>1</sup>H NMR (400 MHz, CDCl<sub>3</sub>)  $\delta$  7.42 (d, 2H, ArH,  $J = 6.8$  Hz), 7.33 (t, 2H, ArH,  $J = 7.6$  Hz), 7.28-7.24 (m, 1H, ArH), 5.30-5.25 (m, 1H, CH), 4.55 (br s, 2H, CH<sub>2</sub>), 4.24 (br s, 2H, CH<sub>2</sub>), 2.72 (s, 4H, CH<sub>2</sub>), 1.79 (d, 3H, CH<sub>3</sub>,  $J = 7.2$  Hz). <sup>13</sup>C NMR (100 MHz, CDCl<sub>3</sub>)  $\delta$  195.9, 141.9, 128.6, 127.9, 127.5, 51.1, 27.3, 22.0. HRMS (ESI)  $m/z$ : calcd for C<sub>13</sub>H<sub>18</sub>NS<sub>3</sub><sup>+</sup> ([M+H]<sup>+</sup>), 284.0596; found, 284.0604.

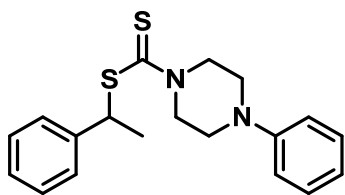

#### 1-Phenylethyl-4-phenylpiperazine-1-carbodithioate (4ai)

The title compound was isolated by silica-gel column chromatography (eluent: petroleum ether /EtOAc = 160:1, v/v) as a light yellow oil liquid in 62% yield (212.4 mg).  $^1\text{H}$  NMR (400 MHz,  $\text{CDCl}_3$ )  $\delta$  7.44 (d, 2H, ArH,  $J = 7.2$  Hz), 7.35-7.26 (m, 5H, ArH), 6.93-6.90 (m, 3H, ArH), 5.34-5.28 (m, 1H, CH), 4.48 (br s, 2H,  $\text{CH}_2$ ), 4.07-4.01 (m, 2H,  $\text{CH}_2$ ), 3.27 (br s, 4H,  $\text{CH}_2$ ), 1.80 (d, 3H,  $\text{CH}_3$ ,  $J = 6.8$  Hz).  $^{13}\text{C}$  NMR (100 MHz,  $\text{CDCl}_3$ )  $\delta$  196.2, 141.9, 134.3, 129.4, 128.6, 127.9, 127.5, 120.7, 116.4, 51.0, 48.8, 22.1. HRMS (ESI)  $m/z$ : calcd for  $\text{C}_{19}\text{H}_{22}\text{N}_2\text{NaS}_2^+$  ( $[\text{M}+\text{Na}]^+$ ), 365.1117; found, 365.1118.

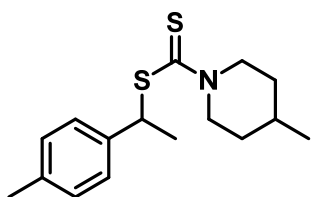

#### 1-(*p*-Tolyl)ethyl 4-methylpiperidine-1-carbodithioate (4aj)

The title compound was isolated by silica-gel column chromatography (eluent: petroleum ether /EtOAc = 160:1, v/v) as a light yellow oil liquid in 51% yield (149.7 mg).  $^1\text{H}$  NMR (400 MHz,  $\text{CDCl}_3$ )  $\delta$  7.24 (d, 2H, ArH,  $J = 8.0$  Hz), 7.05 (d, 2H, ArH,  $J = 7.6$  Hz), 5.44 (br s, 1H,  $\text{CH}_2$ ), 5.19-5.14 (m, 1H, CH), 4.47 (br s, 1H,  $\text{CH}_2$ ), 2.97 (t, 2H,  $\text{CH}_2$ ,  $J = 10.4$  Hz), 2.24 (s, 3H,  $\text{CH}_3$ ), 1.69 (d, 3H,  $\text{CH}_3$ ,  $J = 7.2$  Hz), 1.64 (d, 3H, CH and  $\text{CH}_2$ ,  $J = 11.2$  Hz), 1.18 (s, 2H,  $\text{CH}_2$ ), 0.87 (s, 3H,  $\text{CH}_3$ ).  $^{13}\text{C}$  NMR (100 MHz,  $\text{CDCl}_3$ )  $\delta$  194.9, 137.1, 129.2, 127.8, 51.9, 50.8, 34.1, 33.5, 31.0, 22.2, 21.3, 21.2. HRMS (ESI)  $m/z$ : calcd for  $\text{C}_{16}\text{H}_{24}\text{NS}_2^+$  ( $[\text{M}+\text{H}]^+$ ), 294.1345; found, 294.1347.

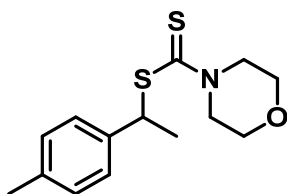

### 1-(*p*-Tolyl)ethyl morpholine-4-carbodithioate (4ak)

The title compound was isolated by silica-gel column chromatography (eluent: petroleum ether /EtOAc = 170/1, v/v) as a light yellow oily liquid in 58% yield (163.2 mg). <sup>1</sup>H NMR (400 MHz, CDCl<sub>3</sub>) δ 7.31 (d, 2H, ArH, *J* = 8.0 Hz), 7.13 (d, 2H, ArH, *J* = 8.0 Hz), 5.29-5.23 (m, 1H, CH), 4.30 (br s, 2H, CH<sub>2</sub>), 3.90 (br s, 2H, CH<sub>2</sub>), 3.72 (s, 4H, CH<sub>2</sub>), 2.32 (s, 3H, CH<sub>3</sub>), 1.77 (d, 3H, CH<sub>3</sub>, *J* = 7.2 Hz). <sup>13</sup>C NMR (100 MHz, CDCl<sub>3</sub>) δ 196.7, 138.8, 137.3, 129.3, 127.8, 66.3, 50.7, 22.1, 21.2. HRMS (ESI) *m/z*: calcd for C<sub>14</sub>H<sub>20</sub>NOS<sub>2</sub><sup>+</sup> ([M+H]<sup>+</sup>), 282.0981; found, 282.0975.

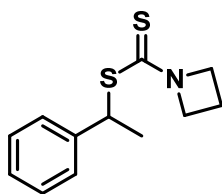

### 1-Phenylethylazetidine-1-carbodithioate (4al)

The title compound was isolated by silica-gel column chromatography (eluent: petroleum ether /EtOAc = 160:1, v/v) as a light yellow oil liquid in 54% yield (128.2 mg). <sup>1</sup>H NMR (400 MHz, CDCl<sub>3</sub>) δ 7.41 (d, 2H, ArH, *J* = 7.2 Hz), 7.32 (t, 2H, ArH, *J* = 7.2 Hz), 7.26-7.23 (m, 1H, ArH), 5.20-5.15 (m, 1H, CH), 4.27 (t, 2H, CH<sub>2</sub>, *J* = 8.0 Hz), 4.15-4.08 (m, 2H, CH<sub>2</sub>), 2.38-2.30 (m, 2H, CH<sub>2</sub>), 1.77 (d, 3H, CH<sub>3</sub>, *J* = 7.2 Hz). <sup>13</sup>C NMR (100 MHz, CDCl<sub>3</sub>) δ 193.2, 142.2, 128.6, 126.9, 127.7, 127.5, 54.5, 53.0, 49.8, 22.4, 15.5. HRMS (ESI) *m/z*: calcd for C<sub>12</sub>H<sub>16</sub>NS<sub>2</sub><sup>+</sup> ([M+H]<sup>+</sup>), 238.0719; found, 238.0719.

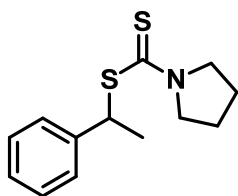

### 1-Phenylethyl pyrrolidine-1-carbodithioate (4am)<sup>[5]</sup>

The title compound was isolated by silica-gel column chromatography (eluent: petroleum ether /EtOAc = 170/1, v/v) as a light yellow oily liquid in 55% yield (138.3 mg). <sup>1</sup>H NMR (400 MHz, DMSO-*d*<sub>6</sub>) δ 7.41 (d, 2H, ArH, *J* = 7.2 Hz), 7.34 (t, 2H, ArH,

$J = 7.6$  Hz), 7.26 (t, 1H, ArH,  $J = 7.2$  Hz), 5.19-5.13 (m, 1H, CH), 3.81-3.71 (m, 2H, CH<sub>2</sub>), 3.60-3.48 (m, 2H, CH<sub>2</sub>), 2.01-1.87 (m, 4H, CH<sub>2</sub>), 1.70 (d, 3H, CH<sub>3</sub>,  $J = 7.2$  Hz). <sup>13</sup>C NMR (100 MHz, DMSO-*d*<sub>6</sub>)  $\delta$  189.7, 142.0, 128.5, 127.6, 127.3, 54.8, 50.4, 49.4, 25.5, 23.6, 21.9.

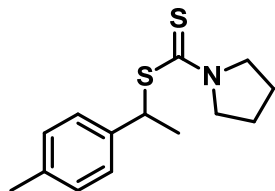

#### 1-(p-Tolyl)ethyl pyrrolidine-1-carbodithioate (4an)

The title compound was isolated by silica-gel column chromatography (eluent: petroleum ether /EtOAc = 160:1, v/v) as a light yellow oil liquid in 54% yield (143.3 mg). <sup>1</sup>H NMR (400 MHz, CDCl<sub>3</sub>)  $\delta$  7.32 (d, 2H, ArH,  $J = 8.0$  Hz), 7.13 (d, 2H, ArH,  $J = 8.0$  Hz), 5.29-5.24 (m, 1H, CH), 3.92 (t, 2H, CH<sub>2</sub>,  $J = 6.8$  Hz), 3.63-3.51 (m, 2H, CH<sub>2</sub>), 2.32 (s, 3H, CH<sub>3</sub>), 2.04-1.93 (m, 4H, CH<sub>2</sub>), 1.77 (d, 3H, CH<sub>3</sub>,  $J = 6.8$  Hz). <sup>13</sup>C NMR (100 MHz, CDCl<sub>3</sub>)  $\delta$  192.0, 139.2, 137.1, 129.2, 127.7, 54.8, 50.5, 49.9, 26.1, 24.3, 22.2, 21.2. HRMS (ESI) *m/z*: calcd for C<sub>14</sub>H<sub>20</sub>NS<sub>2</sub><sup>+</sup> ([M+H]<sup>+</sup>), 266.1032; found, 266.1025.

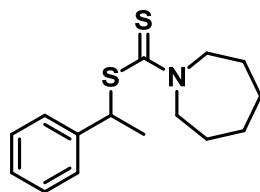

#### 1-Phenylethyl azepane-1-carbodithioate (4ao)

The title compound was isolated by silica-gel column chromatography (eluent: petroleum ether /EtOAc = 170/1, v/v) as a light yellow oily liquid in 52% yield (145.3 mg). <sup>1</sup>H NMR (400 MHz, CDCl<sub>3</sub>)  $\delta$  7.42 (d, 2H, ArH,  $J = 7.2$  Hz), 7.31 (t, 2H, ArH,  $J = 8.0$  Hz), 7.25-7.21 (m, 1H, ArH), 5.31-5.25 (m, 1H, CH), 4.16 (t, 2H, CH<sub>2</sub>,  $J = 6.0$  Hz), 3.81 (t, 2H, CH<sub>2</sub>,  $J = 6.0$  Hz), 1.89-1.83 (m, 2H, CH<sub>2</sub>), 1.77 (d, 5H, CH<sub>2</sub> and CH<sub>3</sub>,  $J = 7.2$  Hz), 1.60-1.58 (m, 4H, CH<sub>2</sub>). <sup>13</sup>C NMR (100 MHz, CDCl<sub>3</sub>)  $\delta$  195.4, 142.3, 128.5, 127.9, 127.4, 55.5, 52.8, 50.8, 27.4, 26.7, 26.6, 26.3, 22.2. HRMS (ESI) *m/z*: calcd for

C<sub>15</sub>H<sub>22</sub>NS<sub>2</sub><sup>+</sup> ([M+H]<sup>+</sup>), 280.1188; found, 280.1182.

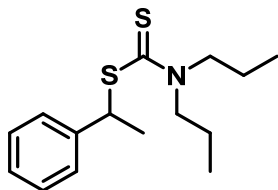

#### 1-Phenylethyl dipropylcarbamodithioate (4ap)

The title compound was isolated by silica-gel column chromatography (eluent: petroleum ether /EtOAc = 170/1, v/v) as a light yellow oily liquid in 56% yield (157.6 mg). <sup>1</sup>H NMR (400 MHz, DMSO-*d*<sub>6</sub>) δ 7.42 (d, 2H, ArH, *J* = 7.6 Hz), 7.35 (t, 2H, ArH, *J* = 7.6 Hz), 7.27 (t, 1H, ArH, *J* = 7.2 Hz), 5.16-5.11 (m, 1H, CH), 3.88-3.84 (m, 2H, CH<sub>2</sub>), 3.60 (t, 2H, CH<sub>2</sub>, *J* = 8.4 Hz), 1.70 (d, 3H, CH<sub>3</sub>, *J* = 6.8 Hz), 1.66-1.60 (m, 4H, CH<sub>2</sub>), 0.86 (t, 6H, CH<sub>3</sub>, *J* = 7.6 Hz). <sup>13</sup>C NMR (100 MHz, DMSO-*d*<sub>6</sub>) δ 193.4, 141.9, 128.5, 127.7, 127.3, 55.9, 53.7, 50.3, 21.9, 20.3, 19.1, 11.0, 10.9. HRMS (ESI) *m/z*: calcd for C<sub>15</sub>H<sub>24</sub>NS<sub>2</sub><sup>+</sup> ([M+H]<sup>+</sup>), 282.1345; found, 282.1336.

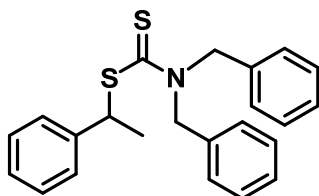

#### 1-Phenylethyl dibenzylcarbamodithioate (4aq)<sup>[5]</sup>

The title compound was isolated by silica-gel column chromatography (eluent: petroleum ether /EtOAc = 160:1, v/v) as a light yellow oil liquid in 85% yield (320.9 mg). <sup>1</sup>H NMR (400 MHz, DMSO-*d*<sub>6</sub>) δ 7.41-7.24 (m, 13H, ArH), 7.17 (d, 2H, ArH, *J* = 7.2 Hz), 5.32-5.22 (m, 2H, CH<sub>2</sub>), 5.19-5.14 (m, 1H, CH), 4.94 (t, 2H, CH<sub>2</sub>, *J* = 18.0 Hz), 1.71 (d, 3H, CH<sub>3</sub>, *J* = 7.2 Hz). <sup>13</sup>C NMR (100 MHz, DMSO-*d*<sub>6</sub>) δ 197.0, 141.5, 135.5, 134.9, 128.7, 128.5, 127.7, 127.6, 127.4, 126.7, 56.2, 54.3, 51.3, 21.8.

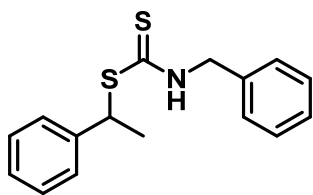

#### 1-Phenylethyl benzylcarbamdithioate (4ar)

The title compound was isolated by silica-gel column chromatography (eluent: petroleum ether /EtOAc = 40/1, v/v) as a yellow oil liquid in 72% yield (207.0 mg).  $^1\text{H}$  NMR (400 MHz,  $\text{CDCl}_3$ )  $\delta$  7.32-7.30 (m, 2H, ArH), 7.25-7.22 (m, 4H, ArH), 7.21-7.16 (m, 2H, ArH), 7.14-7.12 (m, 2H, ArH), 6.91 (br s, 1H, NH), 5.04-4.99 (m, 1H, CH), 4.79-4.68 (m, 2H,  $\text{CH}_2$ ), 1.64 (d, 3H,  $\text{CH}_3$ ,  $J = 7.2$  Hz).  $^{13}\text{C}$  NMR (100 MHz,  $\text{CDCl}_3$ )  $\delta$  196.9, 142.0, 136.0, 128.9, 128.8, 128.3, 128.1, 127.7, 127.5, 51.0, 49.4, 22.3. HRMS (ESI)  $m/z$ : calcd for  $\text{C}_{16}\text{H}_{18}\text{NS}_2^+$  ( $[\text{M}+\text{H}]^+$ ), 288.0875; found, 288.0867.

## 8. Characterization data for compound 6

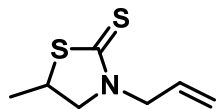

### 3-Allyl-5-methylthiazolidine-2-thione (6a)

The title compound was isolated by silica-gel column chromatography (eluent: petroleum ether /EtOAc = 50/1, v/v) as a light yellow oily liquid in 60% yield (104.0 mg).  $^1\text{H}$  NMR (400 MHz,  $\text{CDCl}_3$ )  $\delta$  5.88-5.78 (m, 1H, CH), 5.31 (s, 1H,  $\text{CH}_2$ ), 5.28 (d, 1H,  $\text{CH}_2$ ,  $J = 6.8$  Hz), 4.46 (dd, 1H,  $\text{CH}_2$ ,  $J_1 = 6.0$  Hz,  $J_2 = 15.2$  Hz), 4.35 (dd, 1H,  $\text{CH}_2$ ,  $J_1 = 6.4$  Hz,  $J_2 = 14.8$  Hz), 4.12-4.07 (m, 1H,  $\text{CH}_2$ ), 3.81-3.73 (m, 1H, CH), 3.66-3.62 (m, 1H,  $\text{CH}_2$ ), 1.46 (d, 3H,  $\text{CH}_3$ ,  $J = 6.4$  Hz).  $^{13}\text{C}$  NMR (100 MHz,  $\text{CDCl}_3$ )  $\delta$  196.6, 130.7, 119.5, 62.9, 51.6, 38.2, 20.6. HRMS (ESI)  $m/z$ : calcd for  $\text{C}_7\text{H}_{12}\text{NS}_2^+$  ( $[\text{M}+\text{H}]^+$ ), 174.0406; found, 174.0404.

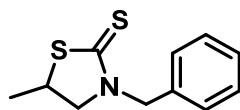

### 3-Benzyl-5-methylthiazolidine-2-thione (6b)

The title compound was isolated by silica-gel column chromatography (eluent: petroleum ether /EtOAc = 50/1, v/v) as a light yellow oily liquid in 56% yield (125.1 mg).  $^1\text{H}$  NMR (400 MHz,  $\text{CDCl}_3$ )  $\delta$  7.39-7.32 (m, 5H, ArH), 5.07 (d, 1H,  $\text{CH}_2$ ,  $J = 14.8$  Hz), 4.92 (d, 1H,  $\text{CH}_2$ ,  $J = 14.4$  Hz), 4.02-3.98 (m, 1H,  $\text{CH}_2$ ), 3.75-3.67 (m, 1H, CH), 3.55-3.50 (m, 1H,  $\text{CH}_2$ ), 1.37 (d, 3H,  $\text{CH}_3$ ,  $J = 6.8$  Hz).  $^{13}\text{C}$  NMR (100 MHz,  $\text{CDCl}_3$ )  $\delta$  197.0, 135.1, 129.0, 128.2 (2), 62.6, 52.6, 38.2, 20.6. HRMS (ESI)  $m/z$ : calcd for  $\text{C}_{11}\text{H}_{14}\text{NS}_2^+$  ( $[\text{M}+\text{H}]^+$ ), 224.0562; found, 224.0553.

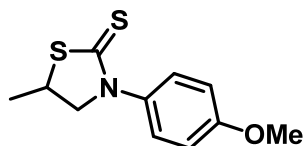

### 3-(4-Methoxyphenyl)-5-methylthiazolidine-2-thione (6c)

The title compound was isolated by silica-gel column chromatography (eluent:

petroleum ether /EtOAc = 40/1, v/v) as a light yellow oily liquid in 71% yield (169.9 mg). <sup>1</sup>H NMR (400 MHz, CDCl<sub>3</sub>) δ 7.31 (d, 2H, ArH, *J* = 8.8 Hz), 6.95 (d, 2H, ArH, *J* = 8.8 Hz), 4.453-4.48 (m, 1H, CH<sub>2</sub>), 4.04-3.99 (m, 1H, CH<sub>2</sub>), 3.95-3.86 (m, 1H, CH), 3.782 (s, 3H, CH<sub>3</sub>), 1.455 (d, 3H, CH<sub>3</sub>, *J* = 6.8 Hz). <sup>13</sup>C NMR (100 MHz, CDCl<sub>3</sub>) δ 197.7, 158.9, 133.3, 114.6, 67.5, 55.5, 39.2, 20.4. HRMS (ESI) *m/z*: calcd for C<sub>11</sub>H<sub>14</sub>NOS<sub>2</sub><sup>+</sup> ([M+H]<sup>+</sup>), 240.0511; found, 240.0511.

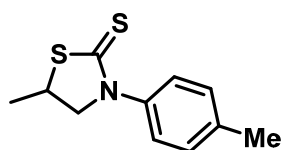

#### 5-Methyl-3-(p-tolyl)thiazolidine-2-thione (6d)<sup>[7]</sup>

The title compound was isolated by silica-gel column chromatography (eluent: petroleum ether /EtOAc = 40/1, v/v) as a light yellow oily liquid in 45% yield (100.5 mg). <sup>1</sup>H NMR (400 MHz, CDCl<sub>3</sub>) δ 7.30-7.24 (m, 4H, ArH), 4.55-4.50 (m, 1H, CH<sub>2</sub>), 4.06-4.02 (m, 1H, CH<sub>2</sub>), 3.95-3.87 (m, 1H, CH), 2.37 (s, 3H, CH<sub>3</sub>), 1.56 (d, 3H, CH<sub>3</sub>, *J* = 6.8 Hz). <sup>13</sup>C NMR (100 MHz, CDCl<sub>3</sub>) δ 197.7, 138.1, 138.0, 130.0, 125.6, 67.4, 39.4, 21.2, 20.4.

### 9. Characterization data for compound 7-11

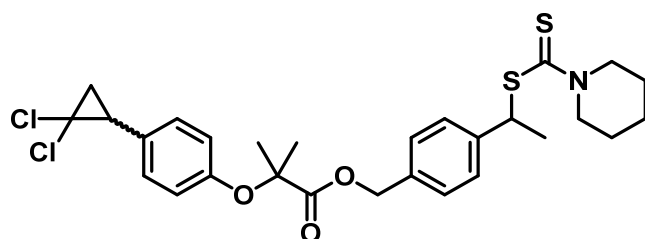

#### 4-(1-((Piperidine-1-carbonothioyl)thio)ethyl)benzyl 2-(4-(2,2-dichlorocyclopropyl)phenoxy)-2-methylpropanoate (7):

The title compound was isolated by silica-gel column chromatography (eluent: petroleum ether /EtOAc = 20/1, v/v) as a yellow oily liquid in 75% yield (425.0 mg). <sup>1</sup>H NMR (400 MHz, CDCl<sub>3</sub>) δ 7.37 (d, 2H, ArH, *J* = 8.0 Hz), 7.18 (d, 2H, ArH, *J* = 8.0 Hz), 7.04 (d, 2H, ArH, *J* = 8.0 Hz), 6.74 (d, 2H, ArH, *J* = 8.4 Hz), 5.31-5.26 (m, 1H, CH), 5.15 (s, 2H, CH<sub>2</sub>), 4.26 (br s, 2H, CH<sub>2</sub>), 3.83 (br s, 2H, CH<sub>2</sub>), 2.82 (dd, 1H, CH,

$J_1 = 10.8$  Hz,  $J_2 = 8.4$  Hz), 1.95-1.90 (m, 1H, CH), 1.78 (d, 1H, CH<sub>2</sub>,  $J = 8.4$  Hz), 1.76 (d, 3H, CH<sub>3</sub>,  $J = 6.8$  Hz), 1.67-1.63 (m, 6H, CH<sub>2</sub>), 1.60 (s, 6H, CH<sub>3</sub>). <sup>13</sup>C NMR (100 MHz, CDCl<sub>3</sub>)  $\delta$  194.3, 174.0, 154.9, 142.6, 134.3, 129.6, 128.5, 128.5, 128.1, 128.1, 128.0, 118.6, 79.2, 66.9, 60.9, 52.7, 51.3, 50.5, 34.8, 25.8, 25.8, 25.5, 25.5, 25.4, 25.4, 24.3, 22.2. HRMS (ESI)  $m/z$ : calcd for C<sub>28</sub>H<sub>34</sub>Cl<sub>2</sub>NO<sub>3</sub>S<sub>2</sub><sup>+</sup> ([M+H]<sup>+</sup>), 566.1352; found, 566.1345.

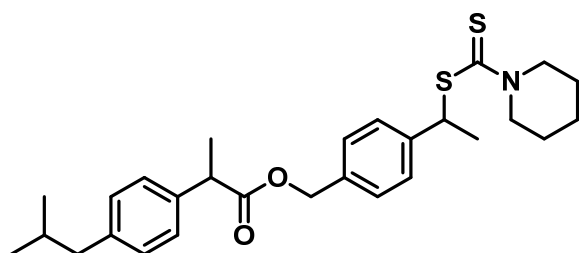

**4-(1-((Piperidine-1-carbonothioyl)thio)ethyl)benzyl**

**2-(4-**

**isobutylphenyl)propanoate (8):**

The title compound was isolated by silica-gel column chromatography (eluent: petroleum ether /EtOAc = 20/1, v/v) as a yellow oily liquid in 46% yield (222.5 mg). <sup>1</sup>H NMR (400 MHz, CDCl<sub>3</sub>)  $\delta$  7.36 (d, 2H, ArH,  $J = 8.0$  Hz), 7.21-7.14 (m, 4H, ArH), 7.08 (d, 2H, ArH,  $J = 8.0$  Hz), 5.30-5.25 (m, 1H, CH), 5.10-5.02 (m, 2H, CH<sub>2</sub>), 4.25 (br s, 2H, CH<sub>2</sub>), 3.78 (br s, 2H, CH<sub>2</sub>), 3.76-3.71 (m, 1H, CH), 2.45 (d, 2H, CH<sub>2</sub>,  $J = 7.2$  Hz), 1.88-1.81 (m, 1H, CH), 1.74 (d, 3H, CH<sub>3</sub>,  $J = 7.2$  Hz), 1.65-1.62 (m, 6H, CH<sub>2</sub>), 1.49 (d, CH<sub>3</sub>, 3H,  $J = 7.2$  Hz), 0.90 (d, 6H, CH<sub>3</sub>,  $J = 6.4$  Hz). <sup>13</sup>C NMR (100 MHz, CDCl<sub>3</sub>)  $\delta$  194.4, 174.5, 142.2, 140.6, 137.6, 135.2, 129.4, 128.0, 127.9, 127.2, 66.0, 52.8, 51.3, 50.6, 45.2, 45.1, 30.2, 26.0, 25.5, 24.3, 22.5, 22.1, 18.5. HRMS (ESI)  $m/z$ : calcd for C<sub>28</sub>H<sub>38</sub>NO<sub>2</sub>S<sub>2</sub><sup>+</sup> ([M+H]<sup>+</sup>), 484.2338; found, 484.2341.

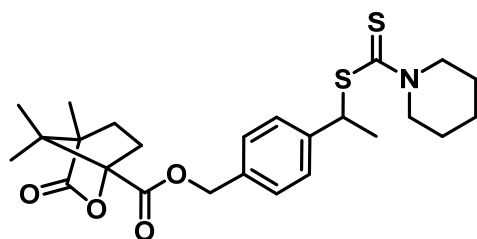

**4-(1-((Piperidine-1-carbonothioyl)thio)ethyl)benzyl (1S,4S)-4,7,7-trimethyl-3-**

**oxo-2-oxabicyclo[2.2.1]heptane-1-carboxylate (9):**

The title compound was isolated by silica-gel column chromatography (eluent: petroleum ether /EtOAc = 20/1, v/v) as a yellow oily liquid in 51% yield (242.6 mg). <sup>1</sup>H NMR (400 MHz, CDCl<sub>3</sub>) δ 7.44 (d, 2H, ArH, *J* = 8.0 Hz), 7.32 (d, 2H, ArH, *J* = 8.0 Hz), 5.32-5.27 (m, 1H, CH), 5.23 (s, 2H, CH<sub>2</sub>), 4.26 (br s, 2H, CH<sub>2</sub>), 3.84 (br s, 2H, CH<sub>2</sub>), 2.47-2.40 (m, 1H, CH<sub>2</sub>), 2.07-2.00 (m, 1H, CH<sub>2</sub>), 1.96-1.89 (m, 1H, CH<sub>2</sub>), 1.76 (d, 3H, CH<sub>3</sub>, *J* = 7.2 Hz), 1.68-1.66 (m, 7H, CH<sub>2</sub>), 1.10 (s, 3H, CH<sub>3</sub>), 1.03 (s, 3H, CH<sub>3</sub>), 0.92 (s, 3H, CH<sub>3</sub>). <sup>13</sup>C NMR (100 MHz, CDCl<sub>3</sub>) δ 194.2, 178.1, 167.4, 142.9, 134.1, 128.5, 128.2, 91.1, 66.9, 54.8, 54.3, 52.7, 51.3, 50.5, 30.7, 28.9, 26.0, 25.5, 24.3, 22.1, 16.8, 16.7, 9.7. HRMS (ESI) *m/z*: calcd for C<sub>25</sub>H<sub>34</sub>NO<sub>4</sub>S<sub>2</sub><sup>+</sup> ([M+H]<sup>+</sup>), 476.1924; found, 476.1924.

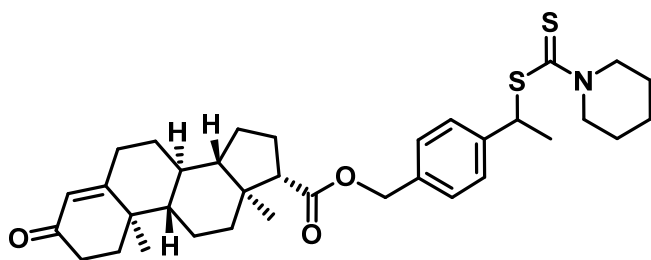

**4-(1-((Piperidine-1-carbonothioyl)thio)ethyl)benzyl (8S,9S,10R,13S,14S,17S)-10,13-dimethyl-3-oxo-2,3,6,7,8,9,10,11,12,13,14,15,16,17-tetradecahydro-1H-cyclopenta[a]phenanthrene-17-carboxylate (10):**

The title compound was isolated by silica-gel column chromatography (eluent: petroleum ether /EtOAc = 20/1, v/v) as a yellow oily liquid in 41% yield (243.3 mg). <sup>1</sup>H NMR (400 MHz, CDCl<sub>3</sub>) δ 7.43 (d, 2H, ArH, *J* = 8.0 Hz), 7.31 (d, 2H, ArH, *J* = 8.0 Hz), 5.73 (s, 1H, CH), 5.33-5.28 (m, 1H, CH), 5.09 (s, 2H, CH<sub>2</sub>), 4.27 (br s, 2H, CH<sub>2</sub>), 3.84 (br s, 2H, CH<sub>2</sub>), 2.47-2.36 (m, 4H, CH<sub>2</sub>), 2.31-2.25 (m, 1H, CH), 2.22-2.13 (m, 1H, CH), 2.04-2.02 (m, 2H, CH<sub>2</sub>), 1.87-1.82 (m, 2H, CH<sub>2</sub>), 1.77 (d, 3H, CH<sub>3</sub>, *J* = 7.2 Hz), 1.73-1.51 (m, 10H, CH<sub>2</sub>), 1.42-1.39 (m, 1H, CH), 1.33-1.26 (m, 2H, CH<sub>2</sub>), 1.18 (s, 3H, CH<sub>3</sub>), 1.15-1.02 (m, 2H, CH<sub>2</sub>), 0.99-0.93 (m, 1H, CH), 0.69 (s, 3H, CH<sub>3</sub>). <sup>13</sup>C NMR (100 MHz, CDCl<sub>3</sub>) δ 199.5, 194.3, 173.7, 171.1, 142.3, 135.3, 128.3, 128.3, 128.0, 123.9, 65.7, 55.4, 55.1, 53.7, 52.7, 51.3, 50.5, 44.1, 38.6, 38.1, 35.7, 35.7, 34.0, 32.8,

31.9, 26.0, 25.4, 24.4, 24.3, 23.6, 22.1, 22.1, 20.9, 17.4, 13.5. HRMS (ESI)  $m/z$ : calcd for  $C_{35}H_{48}NO_3S_2^+$  ( $[M+H]^+$ ), 594.3070; found, 594.3068.

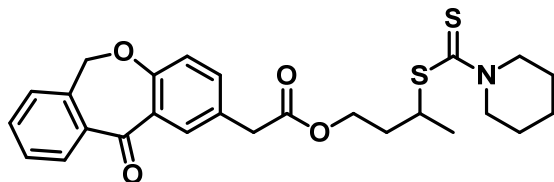

**3-((Piperidine-1-carbonothioyl)thio)butyl 2-(11-oxo-6,11-dihydrodibenzo[b,e]oxepin-2-yl)acetate (11):**

The title compound was isolated by silica-gel column chromatography (eluent: petroleum ether /EtOAc = 20/1, v/v) as a yellow oily liquid in 67% yield (324.1 mg).  $^1H$  NMR (400 MHz,  $CDCl_3$ )  $\delta$  8.11 (d, 1H, ArH,  $J = 2.4$  Hz), 7.89 (d, 1H, ArH,  $J = 7.6$  Hz), 7.55 (td, ArH,  $J_1 = 7.2$  Hz,  $J_2 = 1.2$  Hz), 7.50-7.43 (m, 2H, ArH), 7.36 (d, 1H, ArH,  $J = 7.6$  Hz), 7.03 (d, 1H, ArH,  $J = 8.4$  Hz), 5.18 (s, 2H,  $CH_2$ ), 4.31-4.13 (m, 5H,  $CH_2$  and CH), 3.86 (br s, 2H,  $CH_2$ ), 3.66 (s, 2H,  $CH_2$ ), 2.16-2.08 (m, 1H,  $CH_2$ ), 2.02-1.94 (m, 1H,  $CH_2$ ), 1.68-1.66 (m, 6H,  $CH_2$ ), 1.42 (d, 3H,  $CH_3$ ,  $J = 6.8$  Hz).  $^{13}C$  NMR (100 MHz,  $CDCl_3$ )  $\delta$  194.6, 190.8, 171.4, 160.4, 140.5, 136.5, 135.6, 132.7, 132.5, 129.5, 129.2, 127.8, 127.8, 125.1, 121.1, 73.6, 62.7, 52.6, 51.3, 44.3, 40.3, 35.1, 25.9, 25.5, 24.3, 21.0. HRMS (ESI)  $m/z$ : calcd for  $C_{26}H_{30}NO_4S_2^+$  ( $[M+H]^+$ ), 484.1611; found, 484.1614.

## 10. References

- [1] S. KC, R. K. Dhungana, B. Shrestha, S. Thapa, N. Khanal, P. Basnet, R. W. Lebrun, R. Giri, *J. Am. Chem. Soc.* 2018, 140, 31, 9801.
- [2] Z. Wang, Z. Jin, B. Zhou, *Org. Chem. Front.* 2024, 11, 1382
- [3] J. Y. Kim, W. K. Shin, A. K. Jaladi, D. K. An, *Tetrahedron* **2018**, 74, 4236.
- [4] Y. Jing, C. G. Daniliuc, A. Studer, *Org. Lett.*, **2014**, 16, 4932.
- [5] Q. Sha, Y.-Y. Wei, *Org. Biomol. Chem.*, **2013**, 11, 5615.
- [6] Nihon Bayer Agrochem K.K. *European Patent Organization*, EP578090A2.
- [7] Hercules Inc. United States, US3474045A.

## 11. Spectroscopic data for compound 4

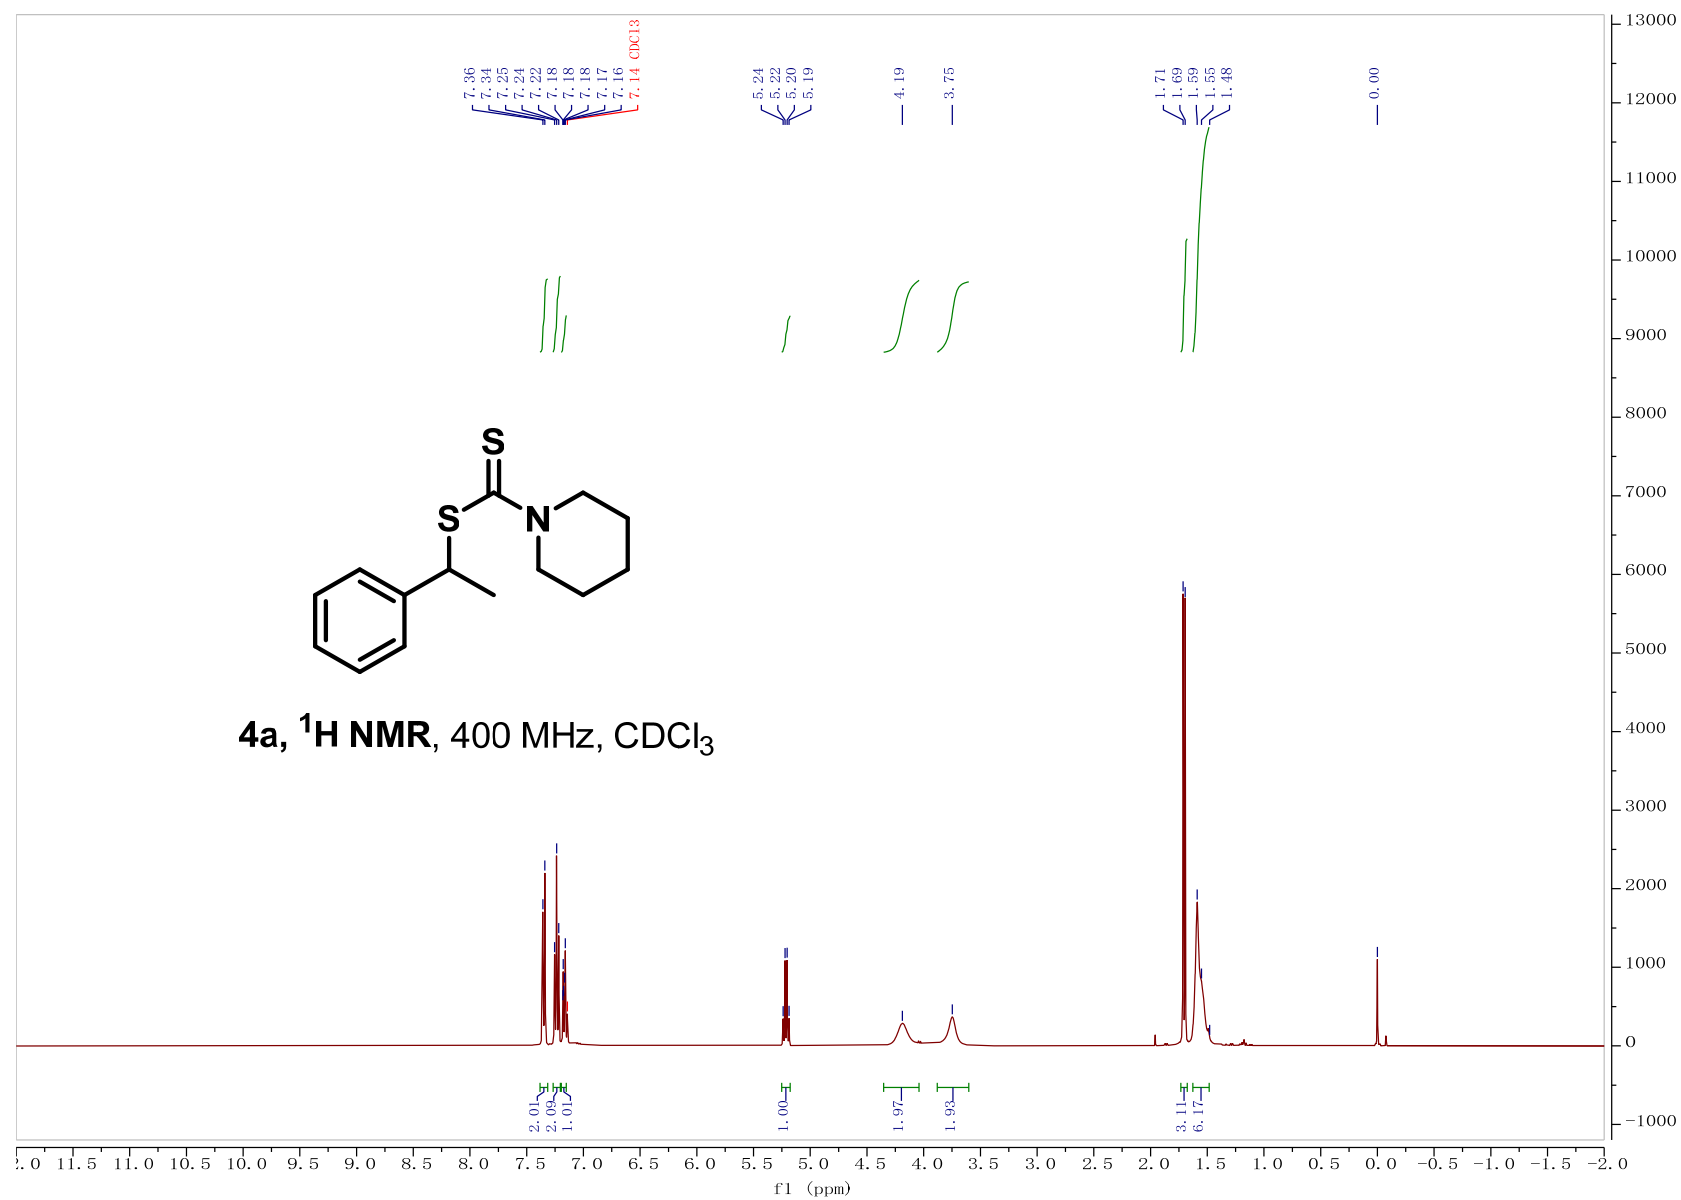

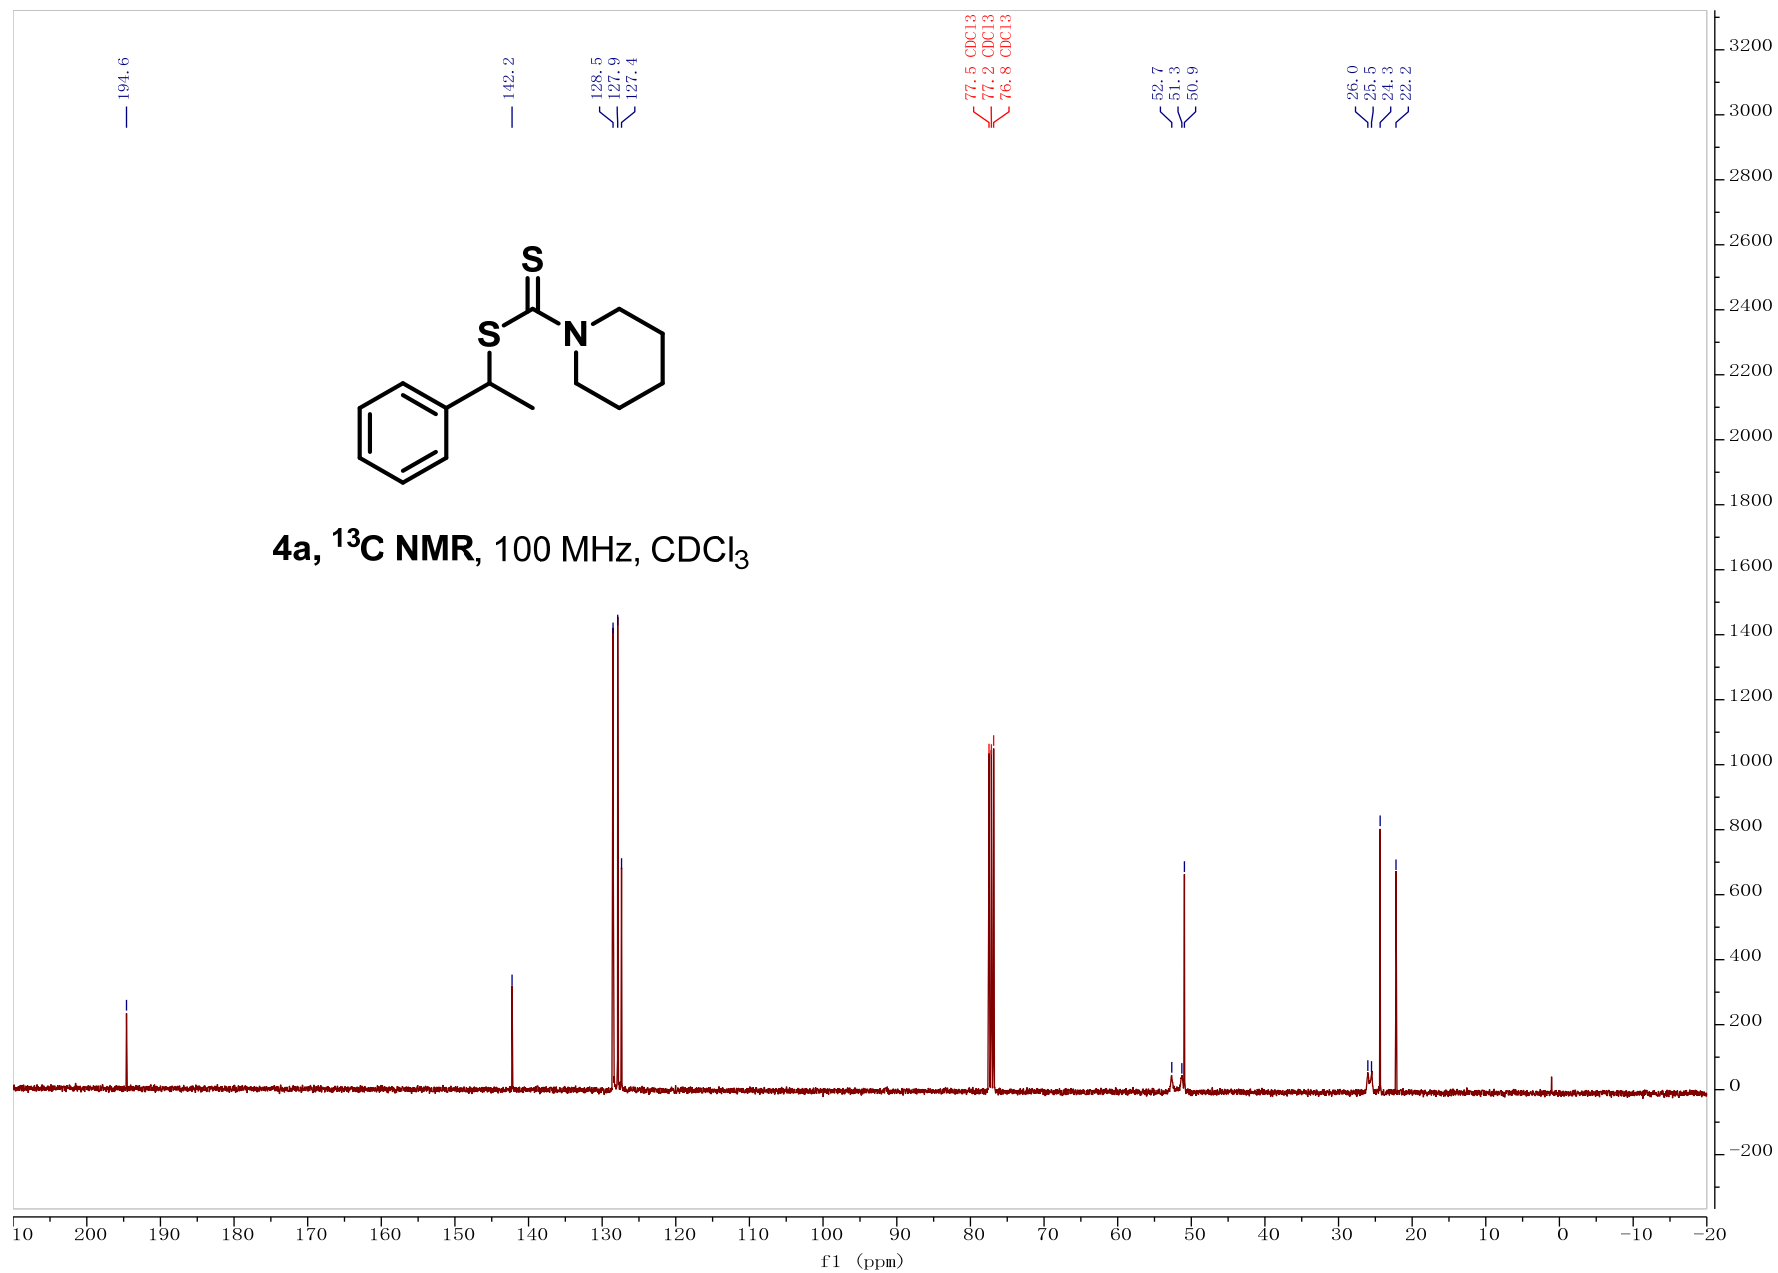

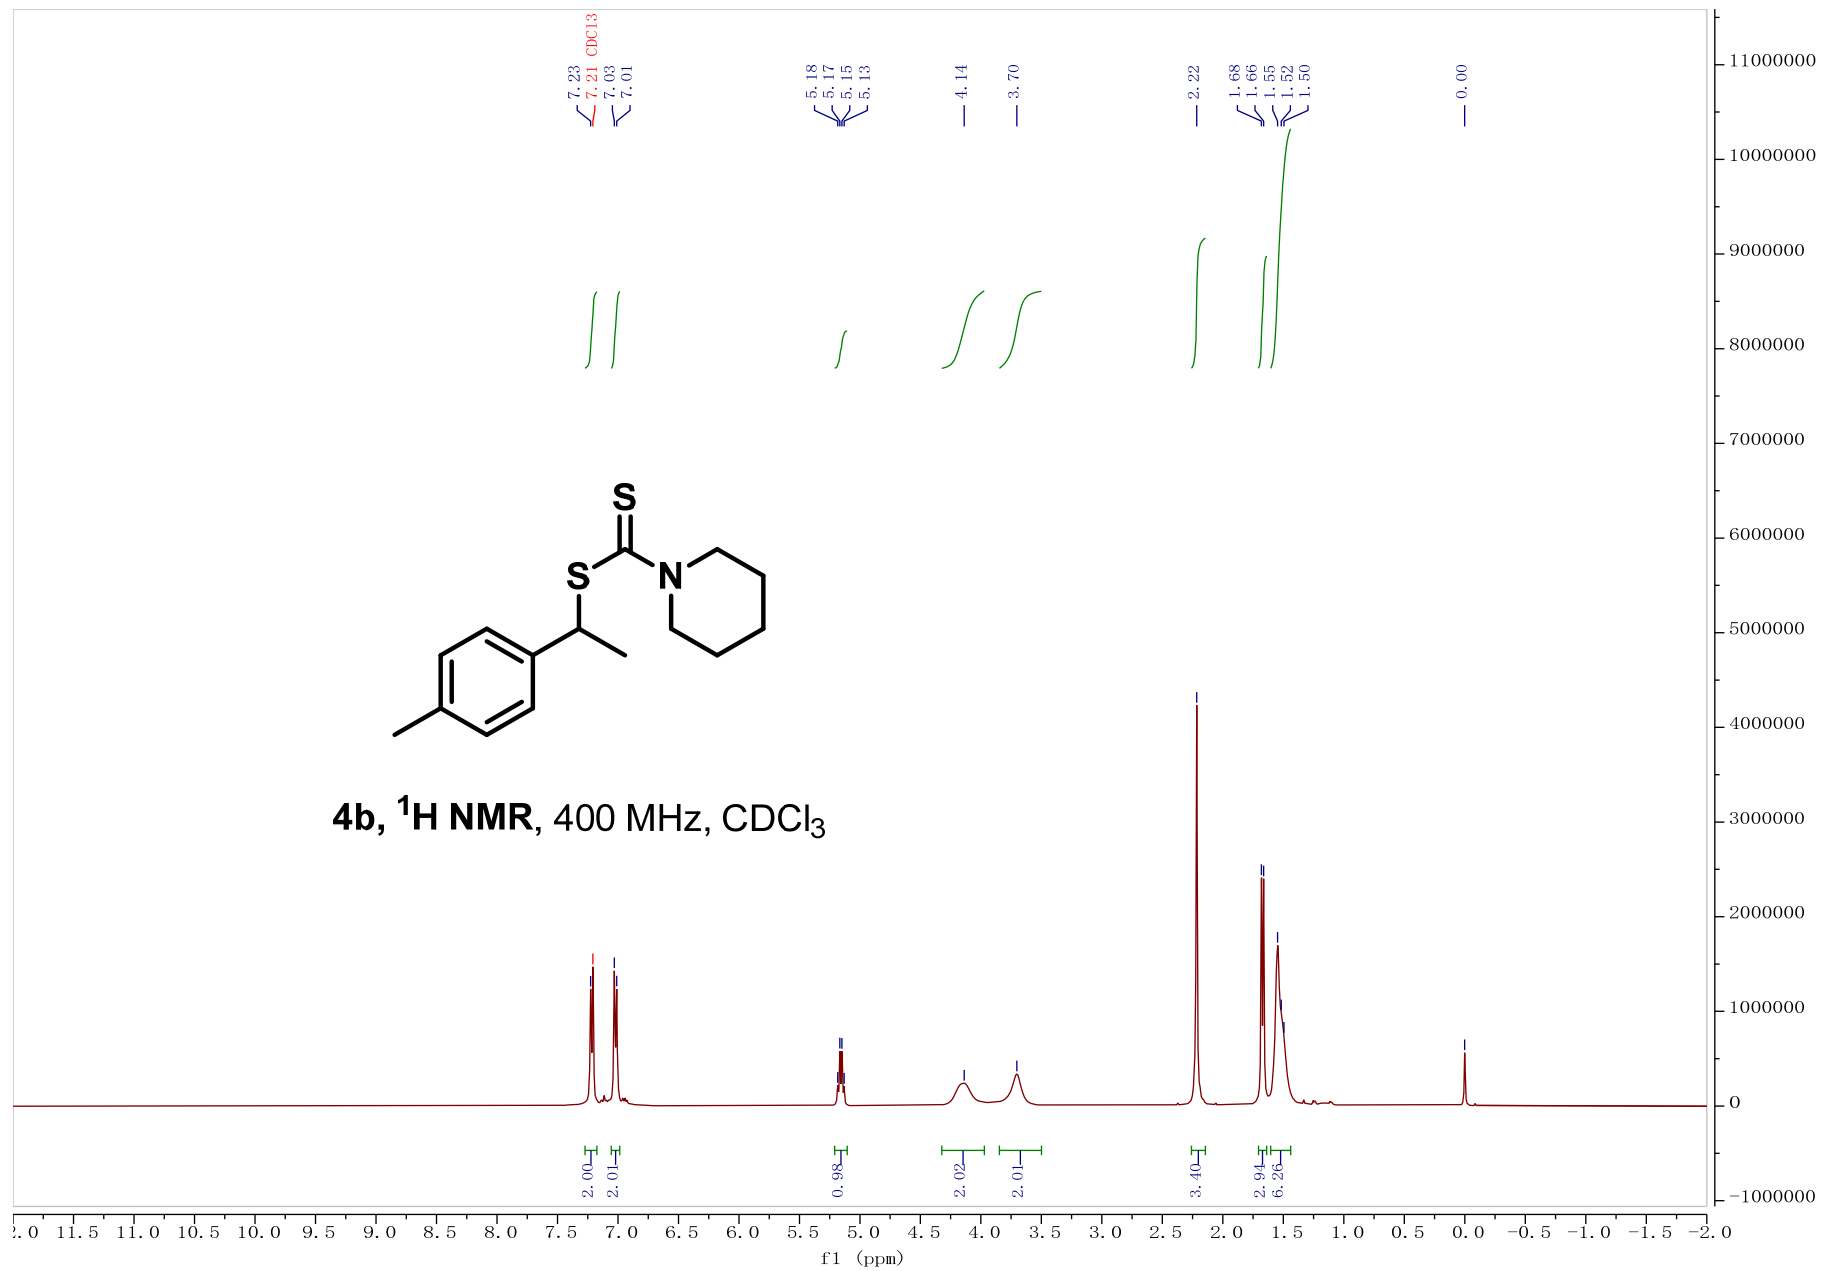

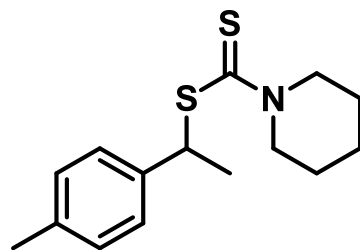

**4b,  $^{13}\text{C}$  NMR, 100 MHz,  $\text{CDCl}_3$**

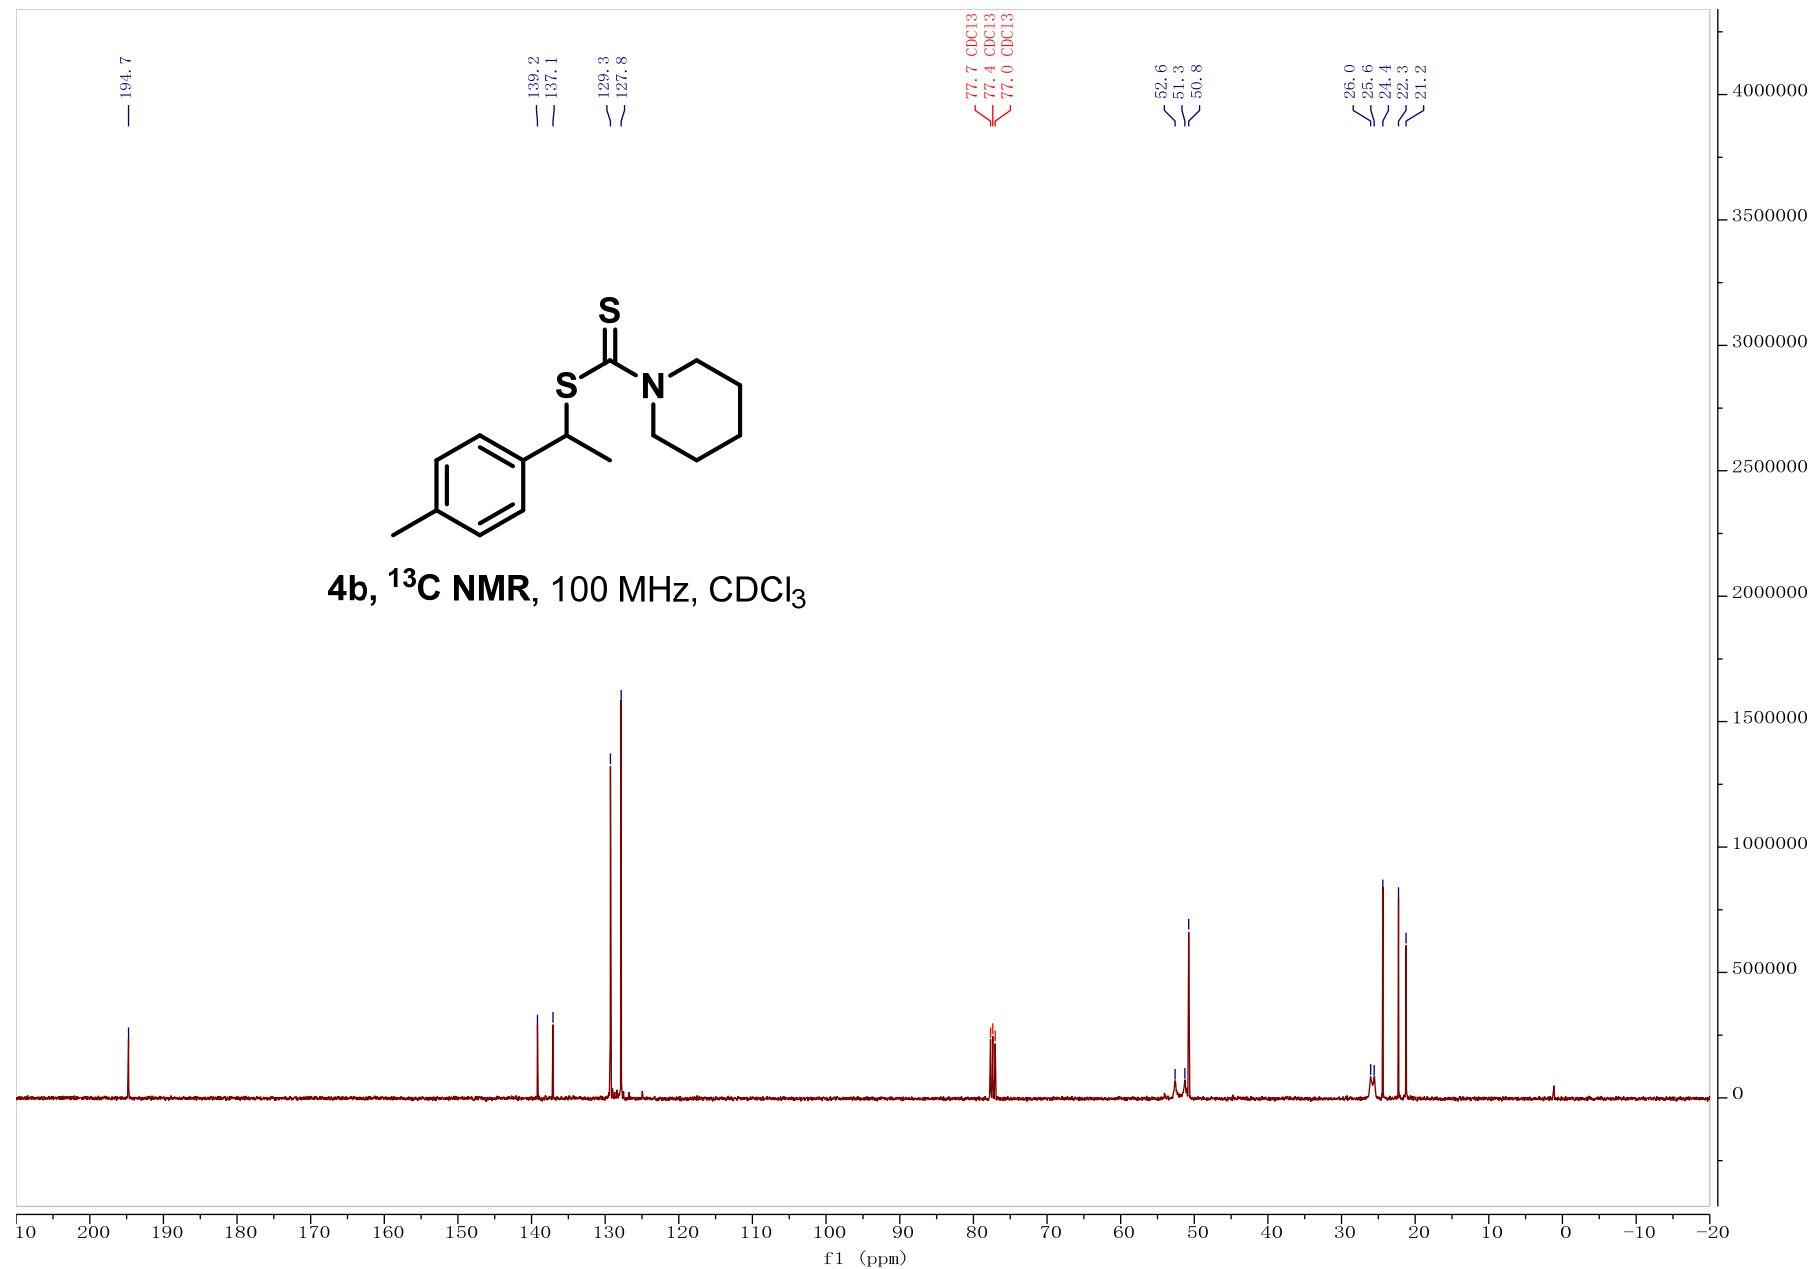

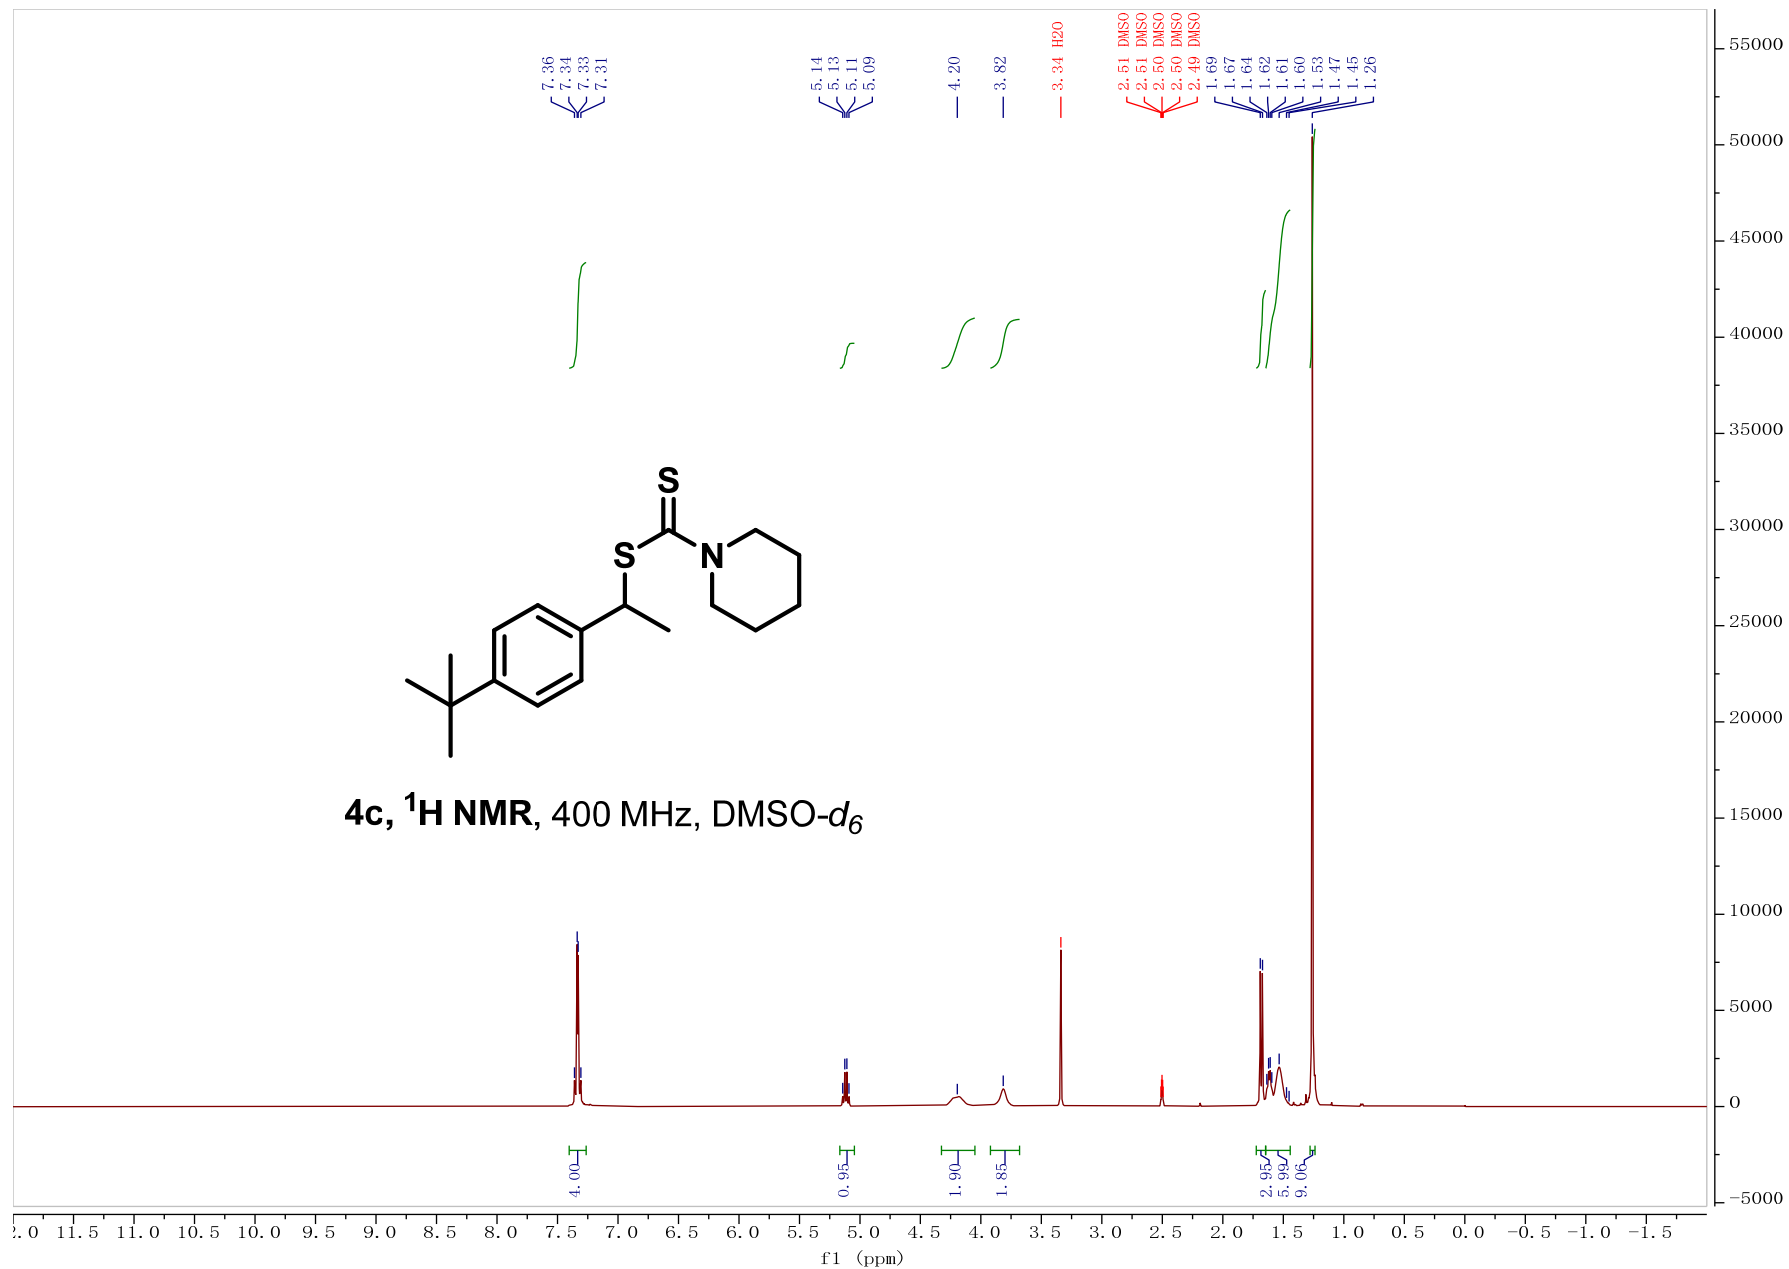

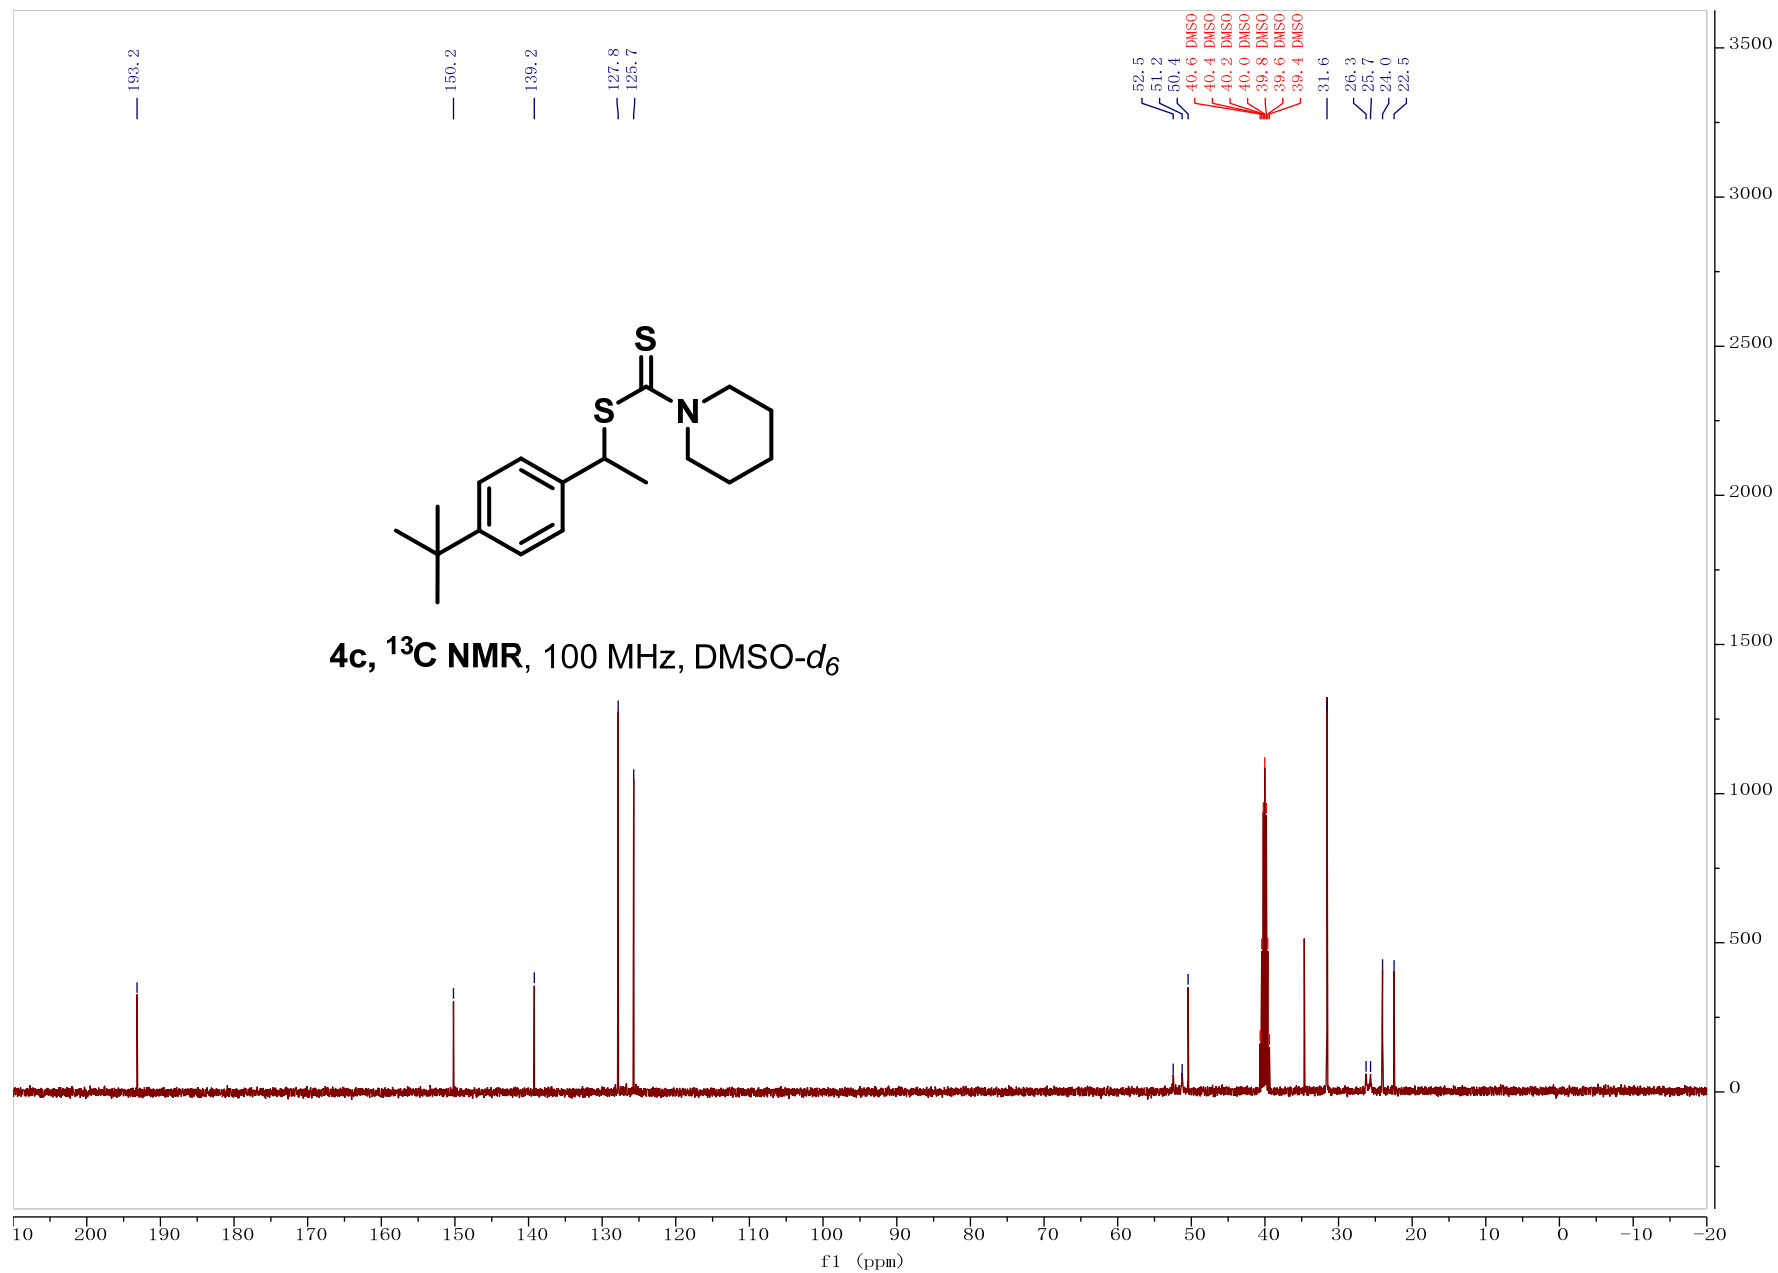

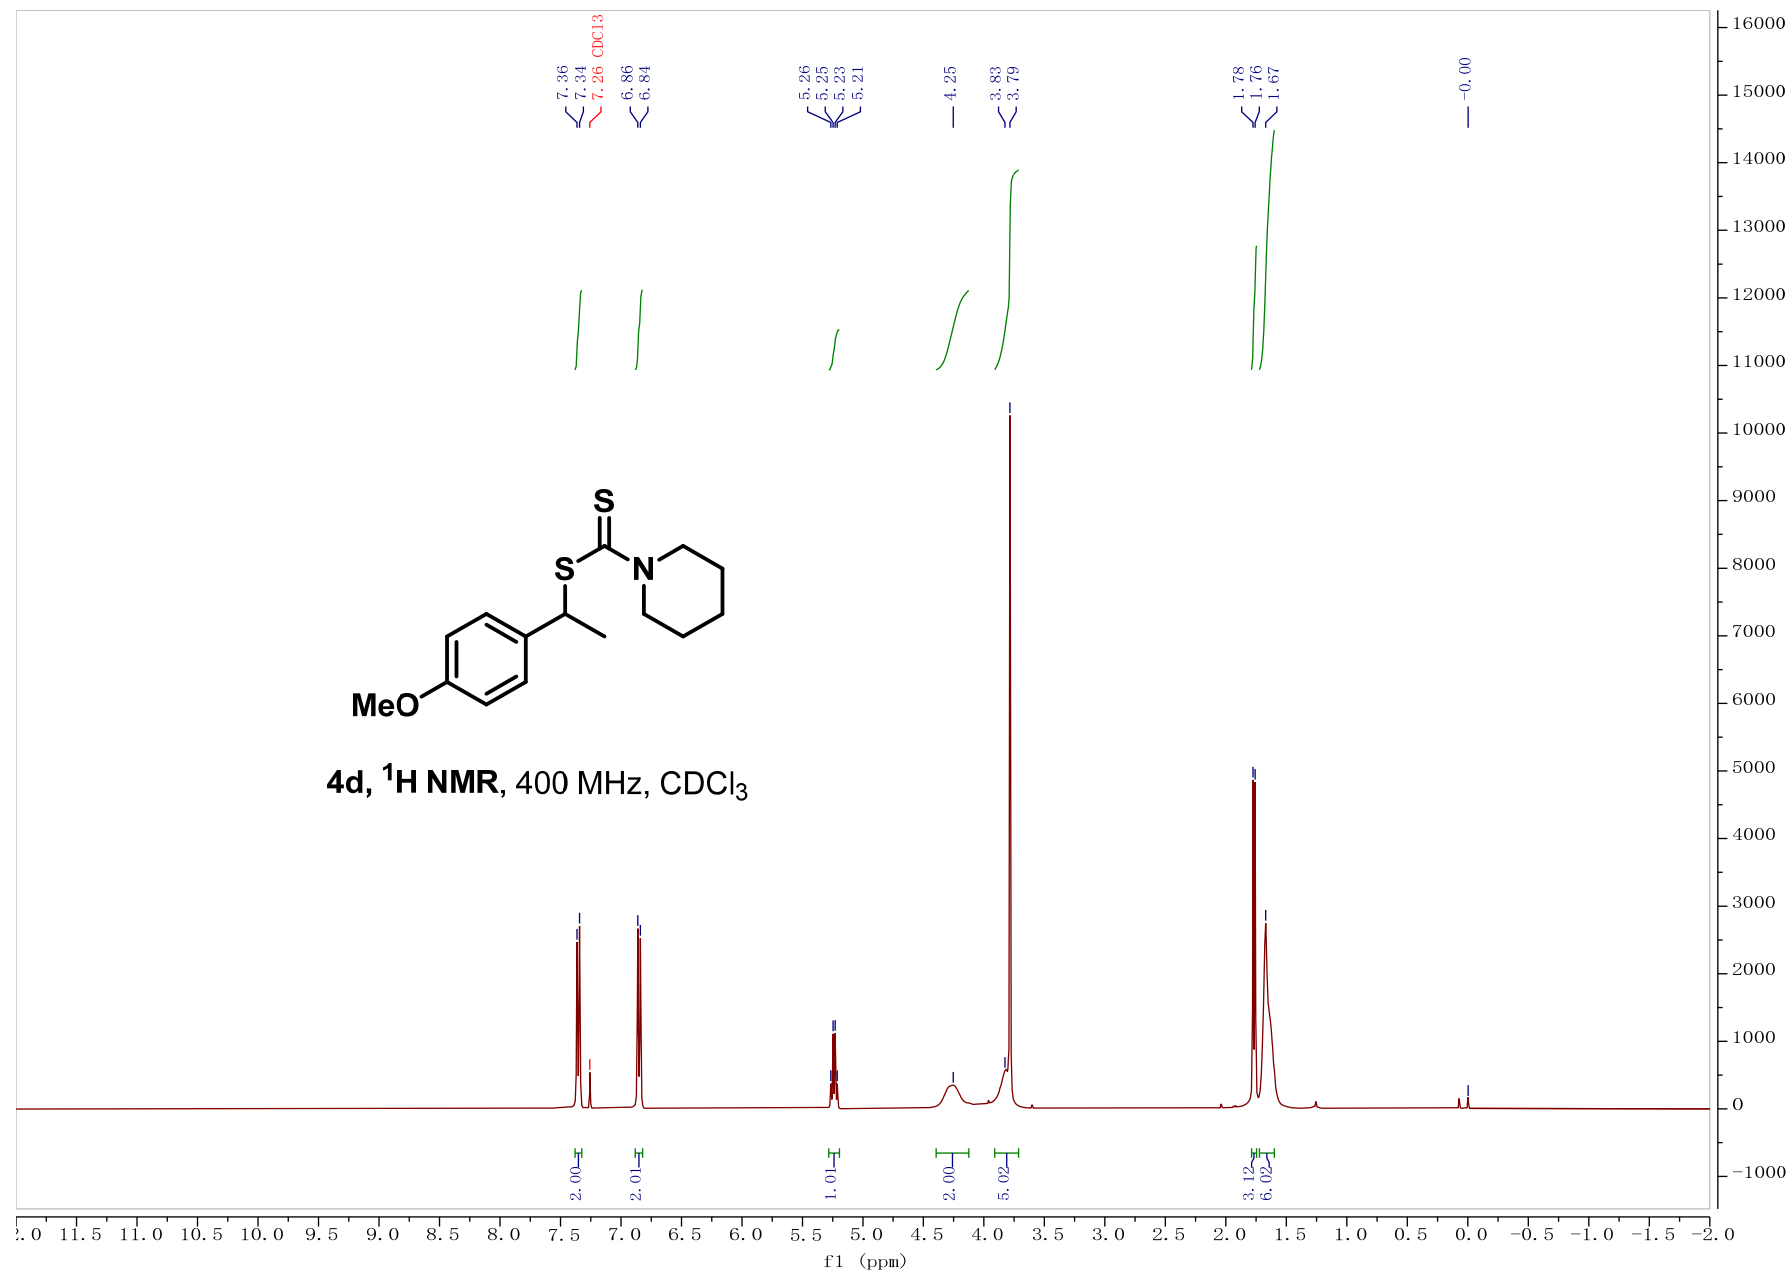

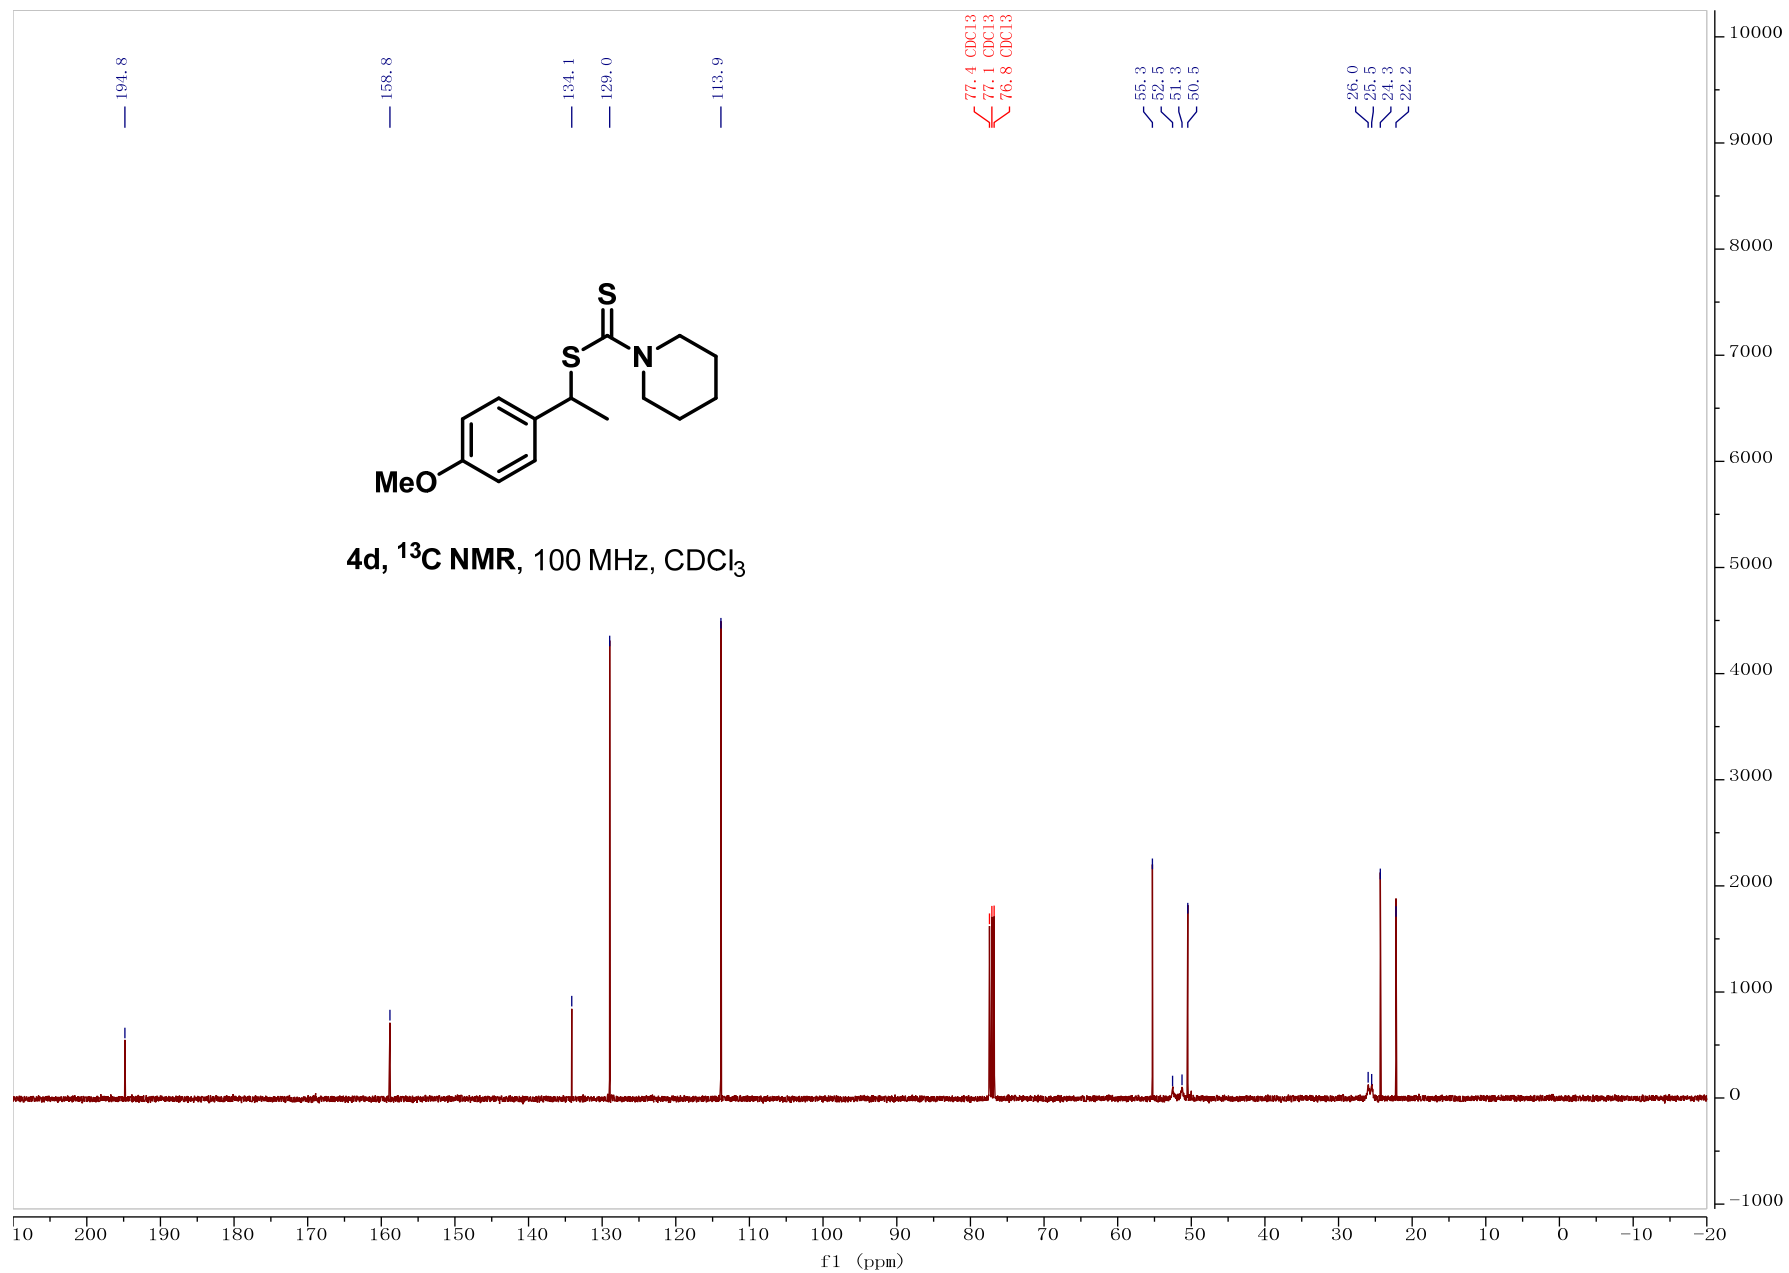

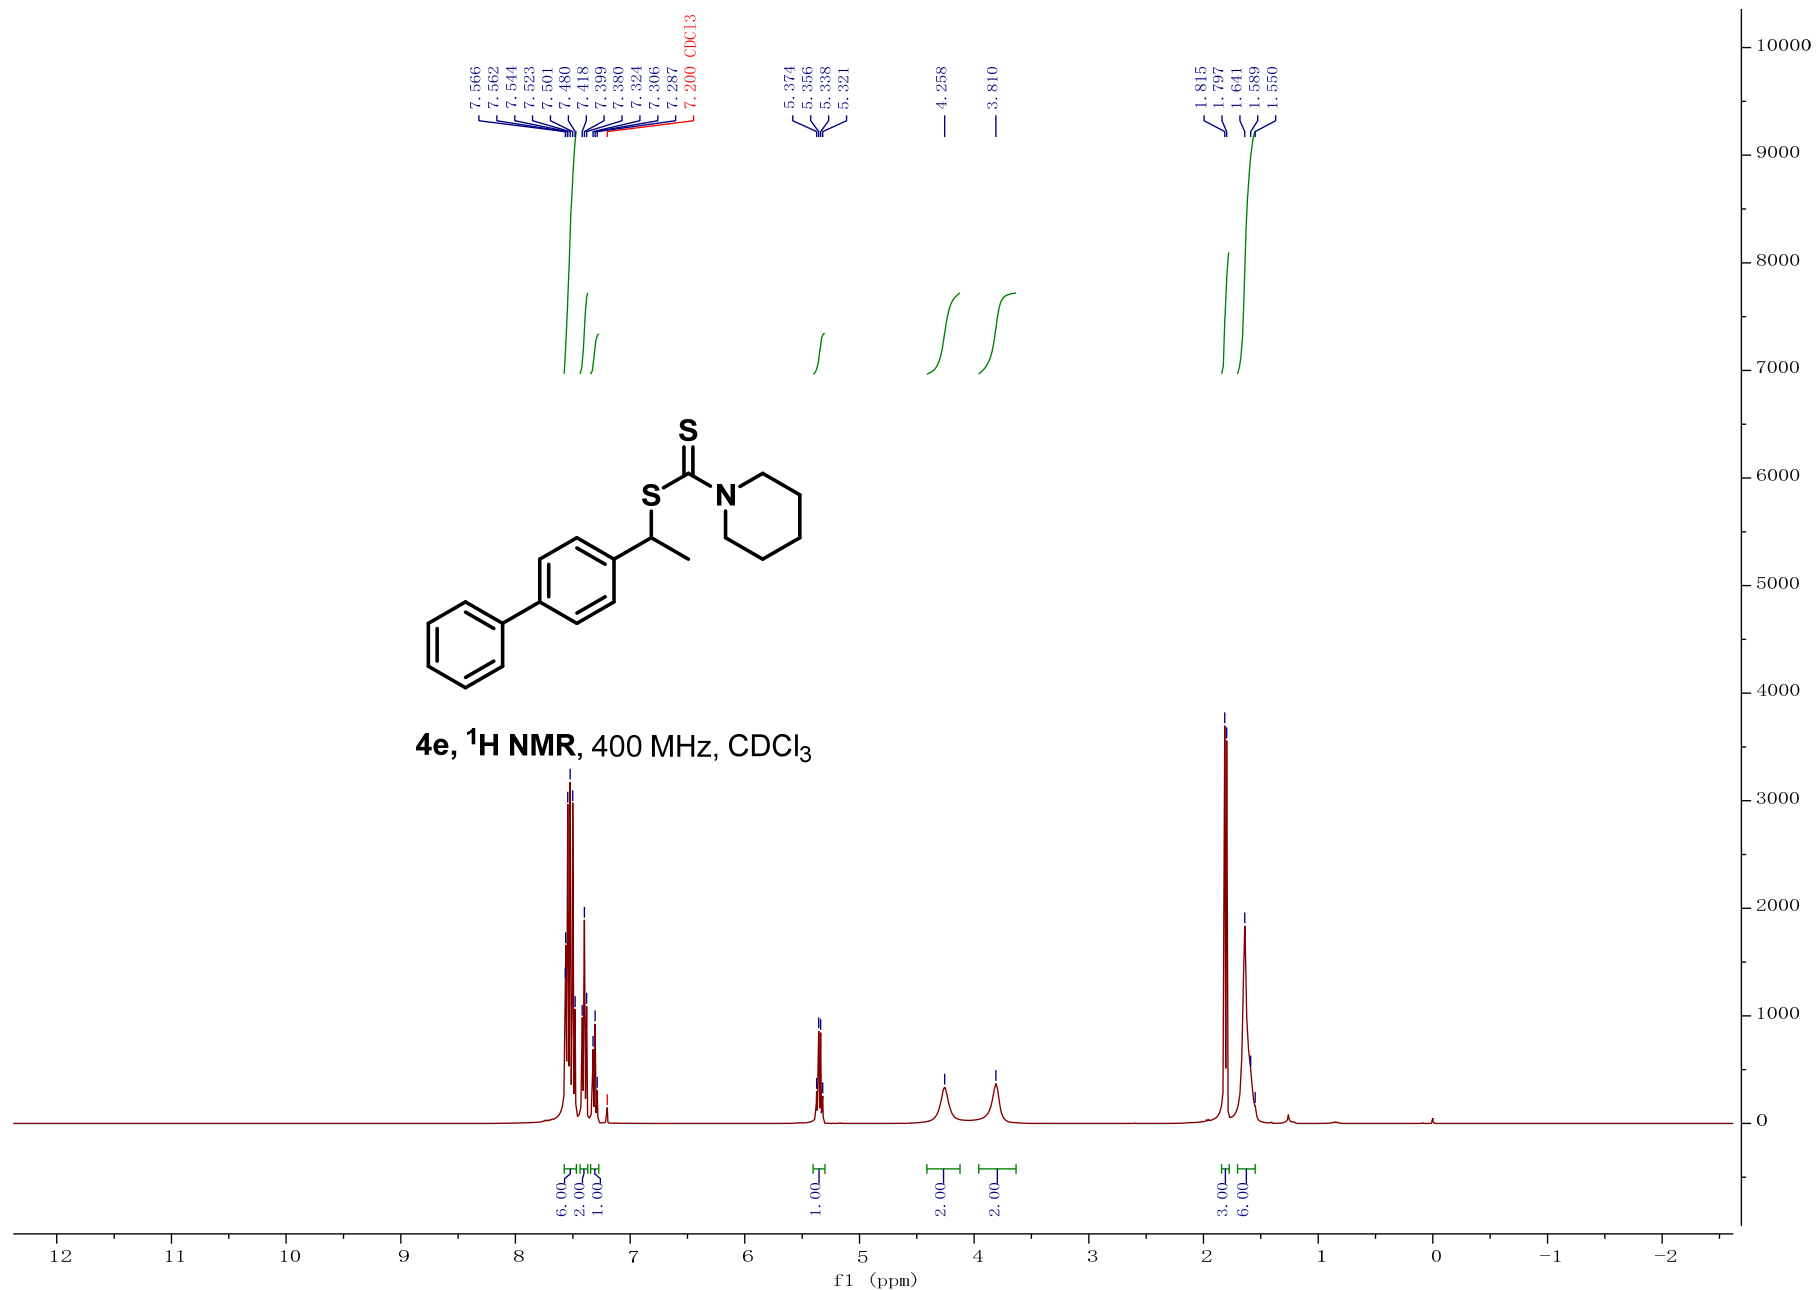

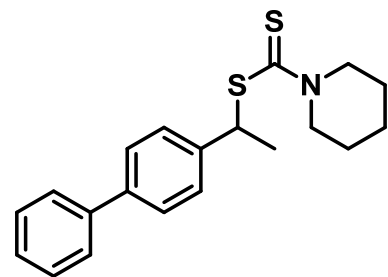

4e,  $^{13}\text{C}$  NMR, 100 MHz,  $\text{CDCl}_3$

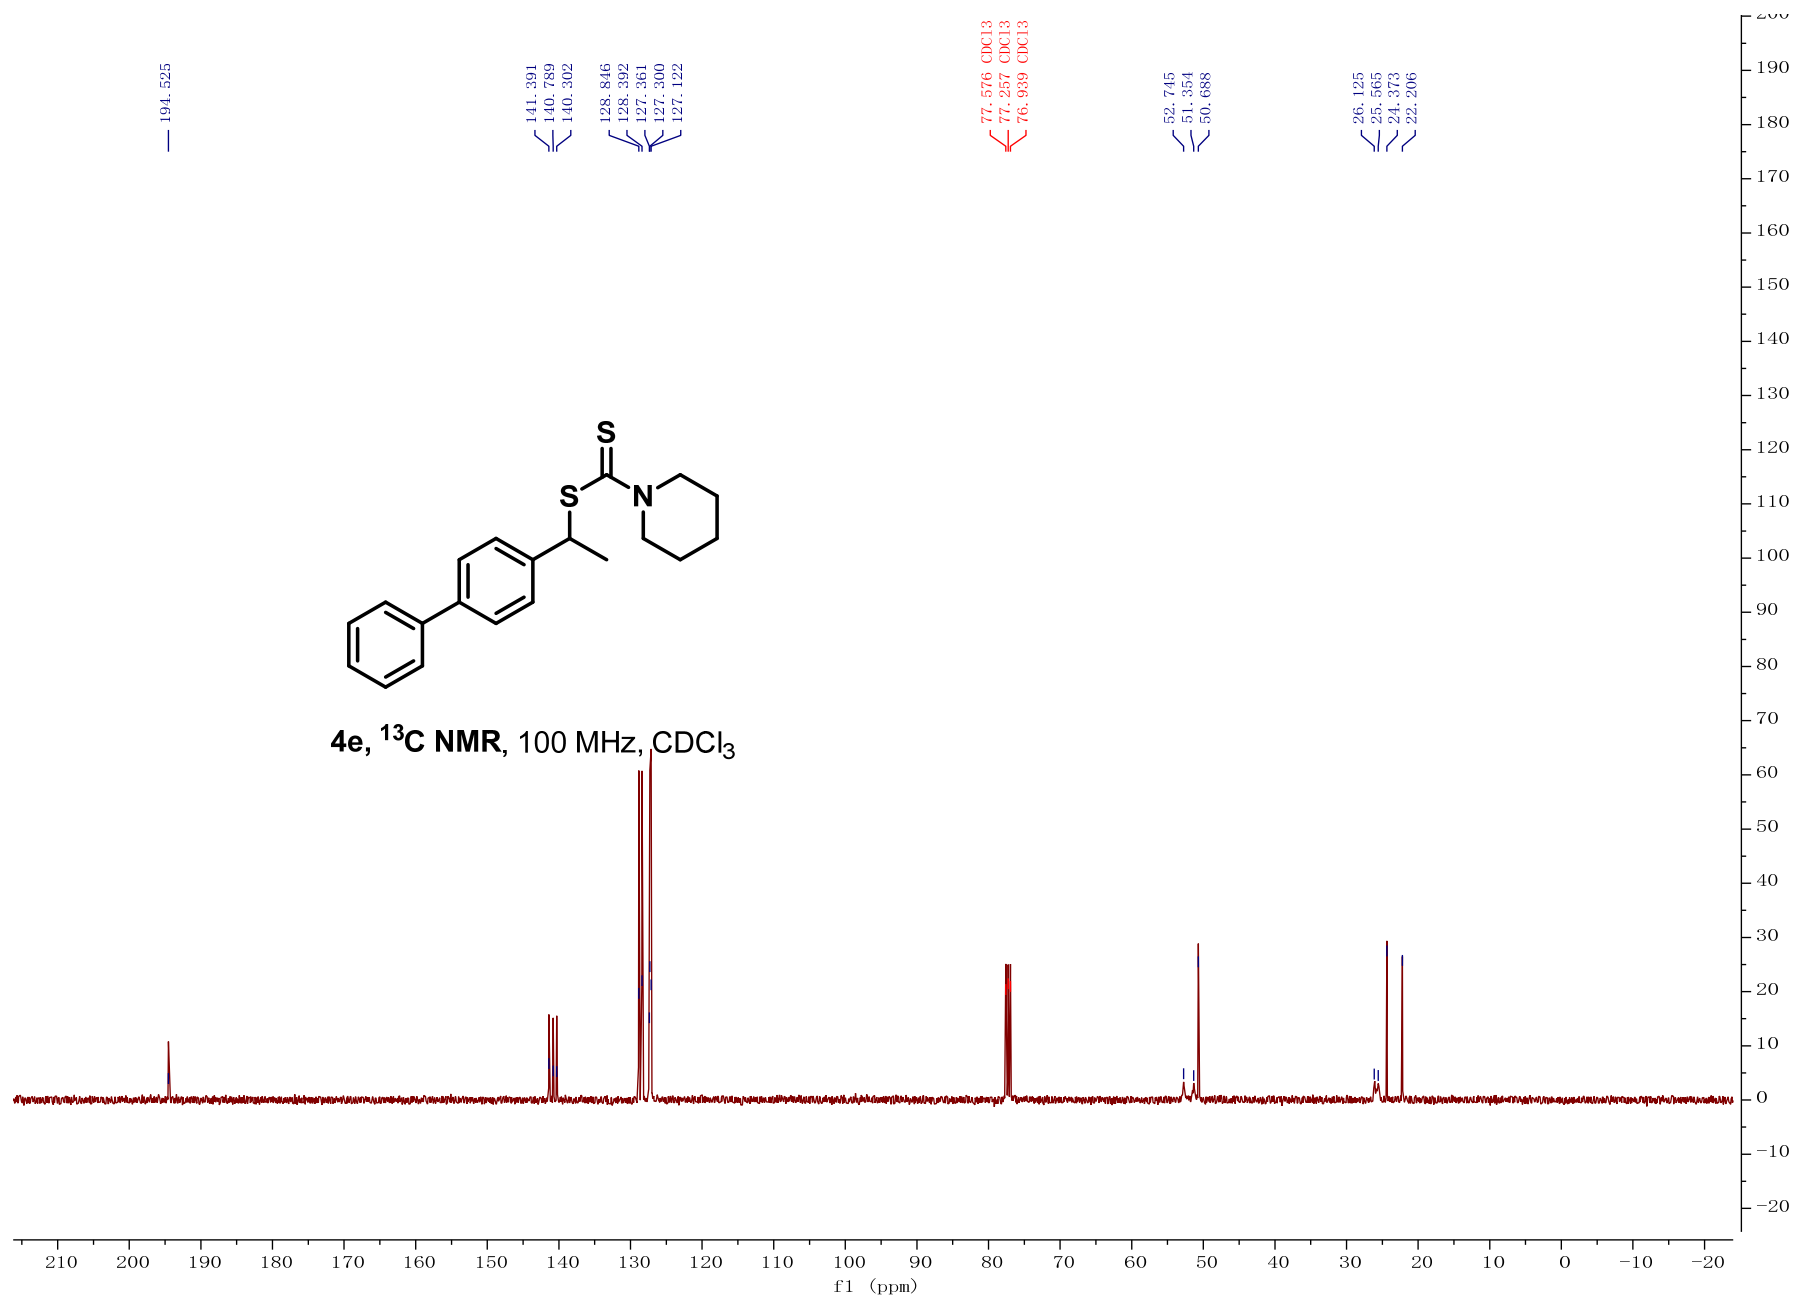

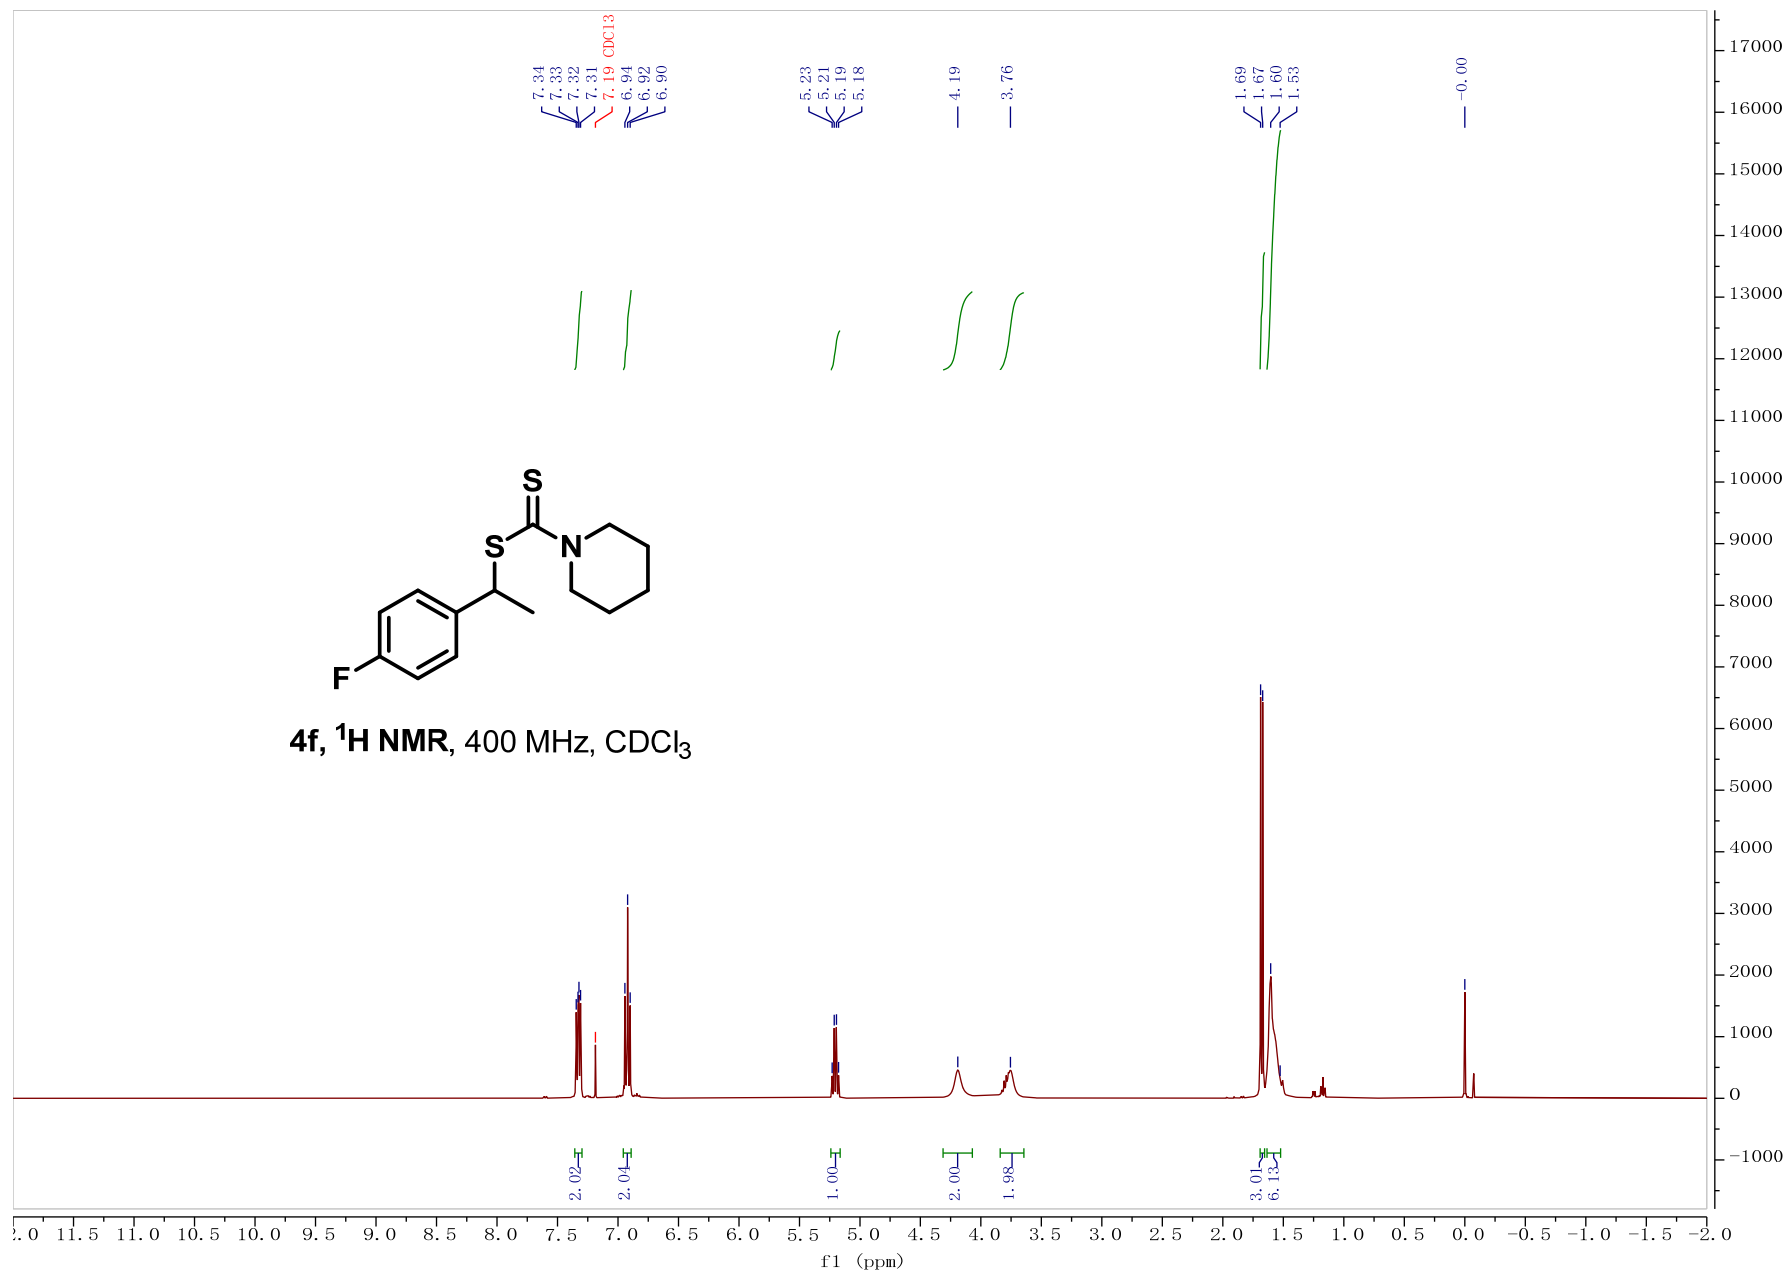

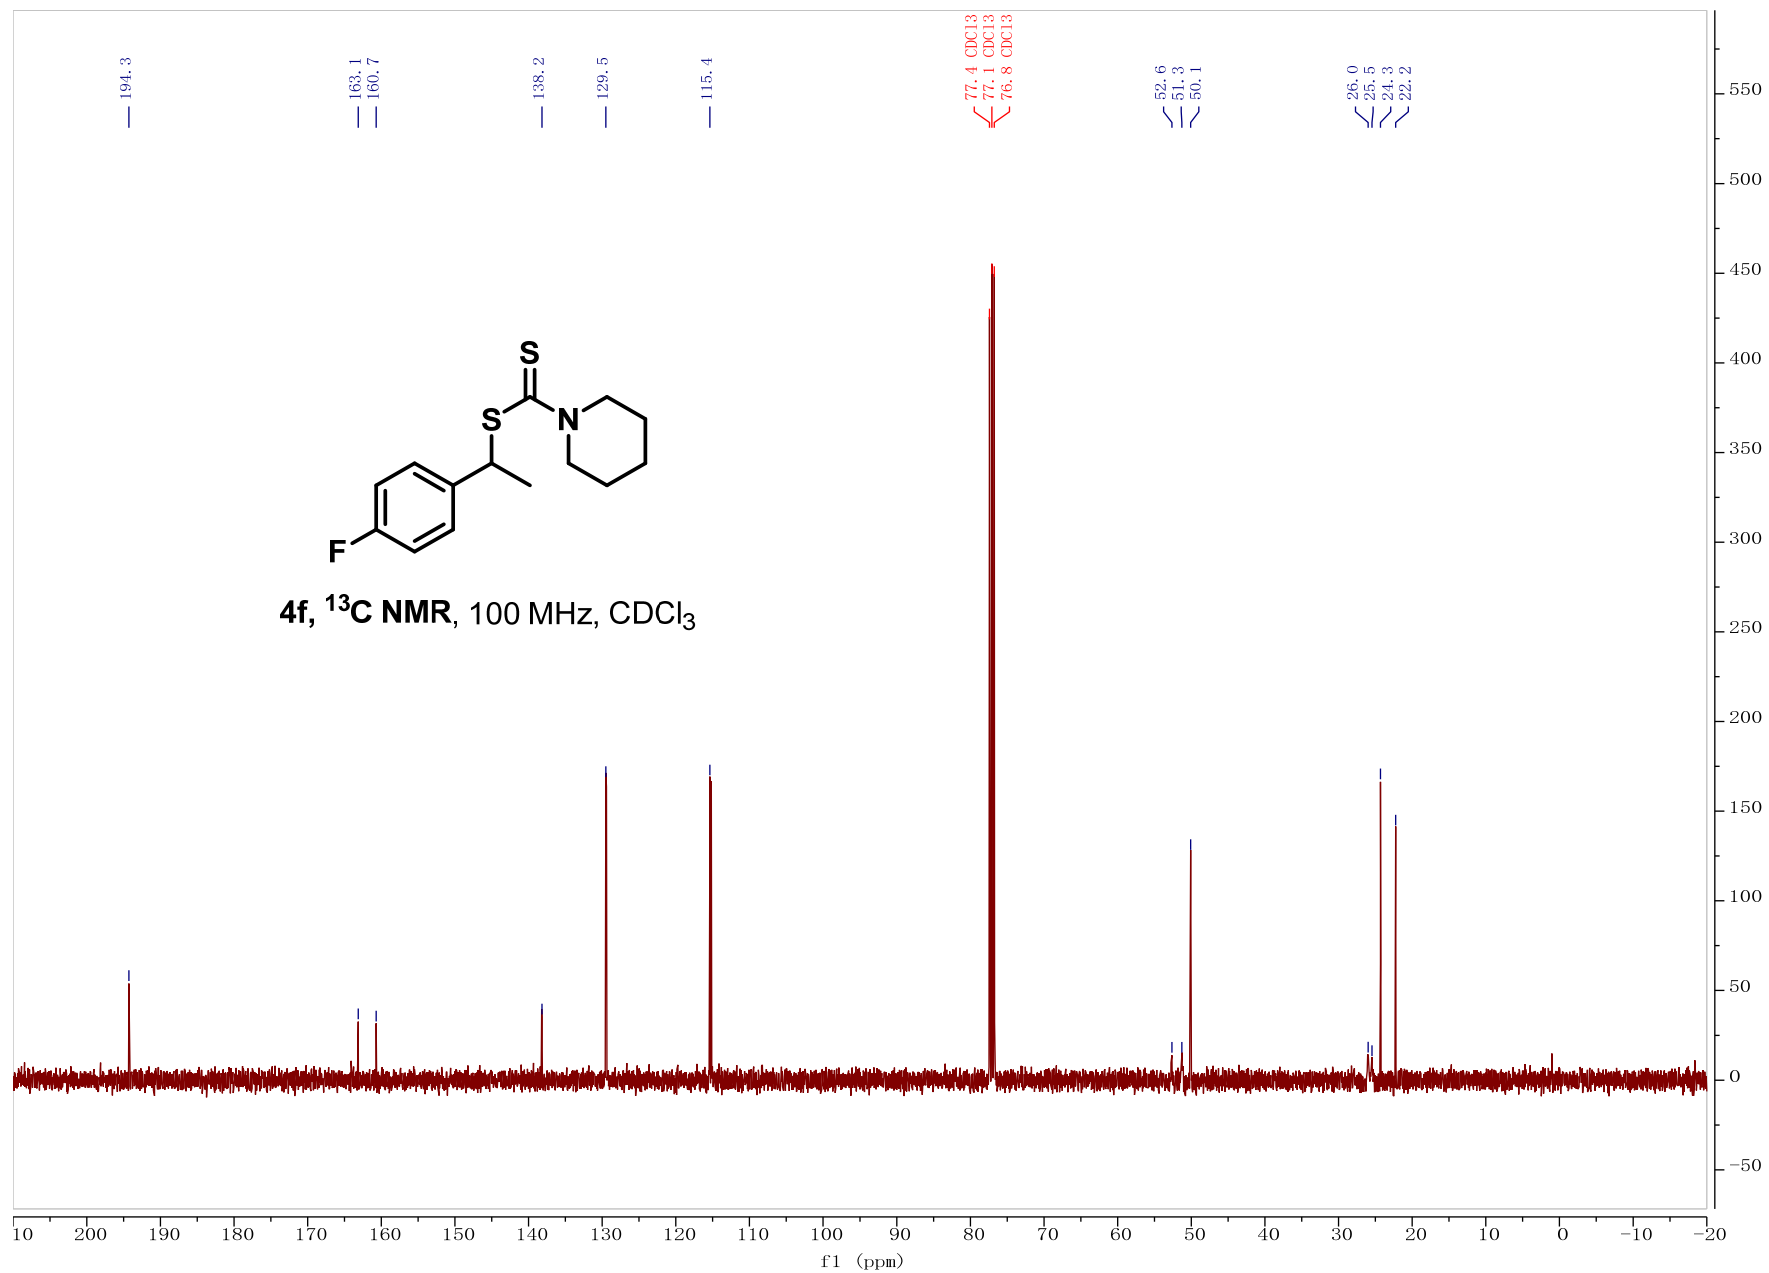

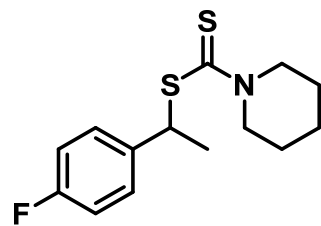

**4f**,  $^{19}\text{F}$  NMR, 376 MHz,  $\text{DMSO-}d_6$

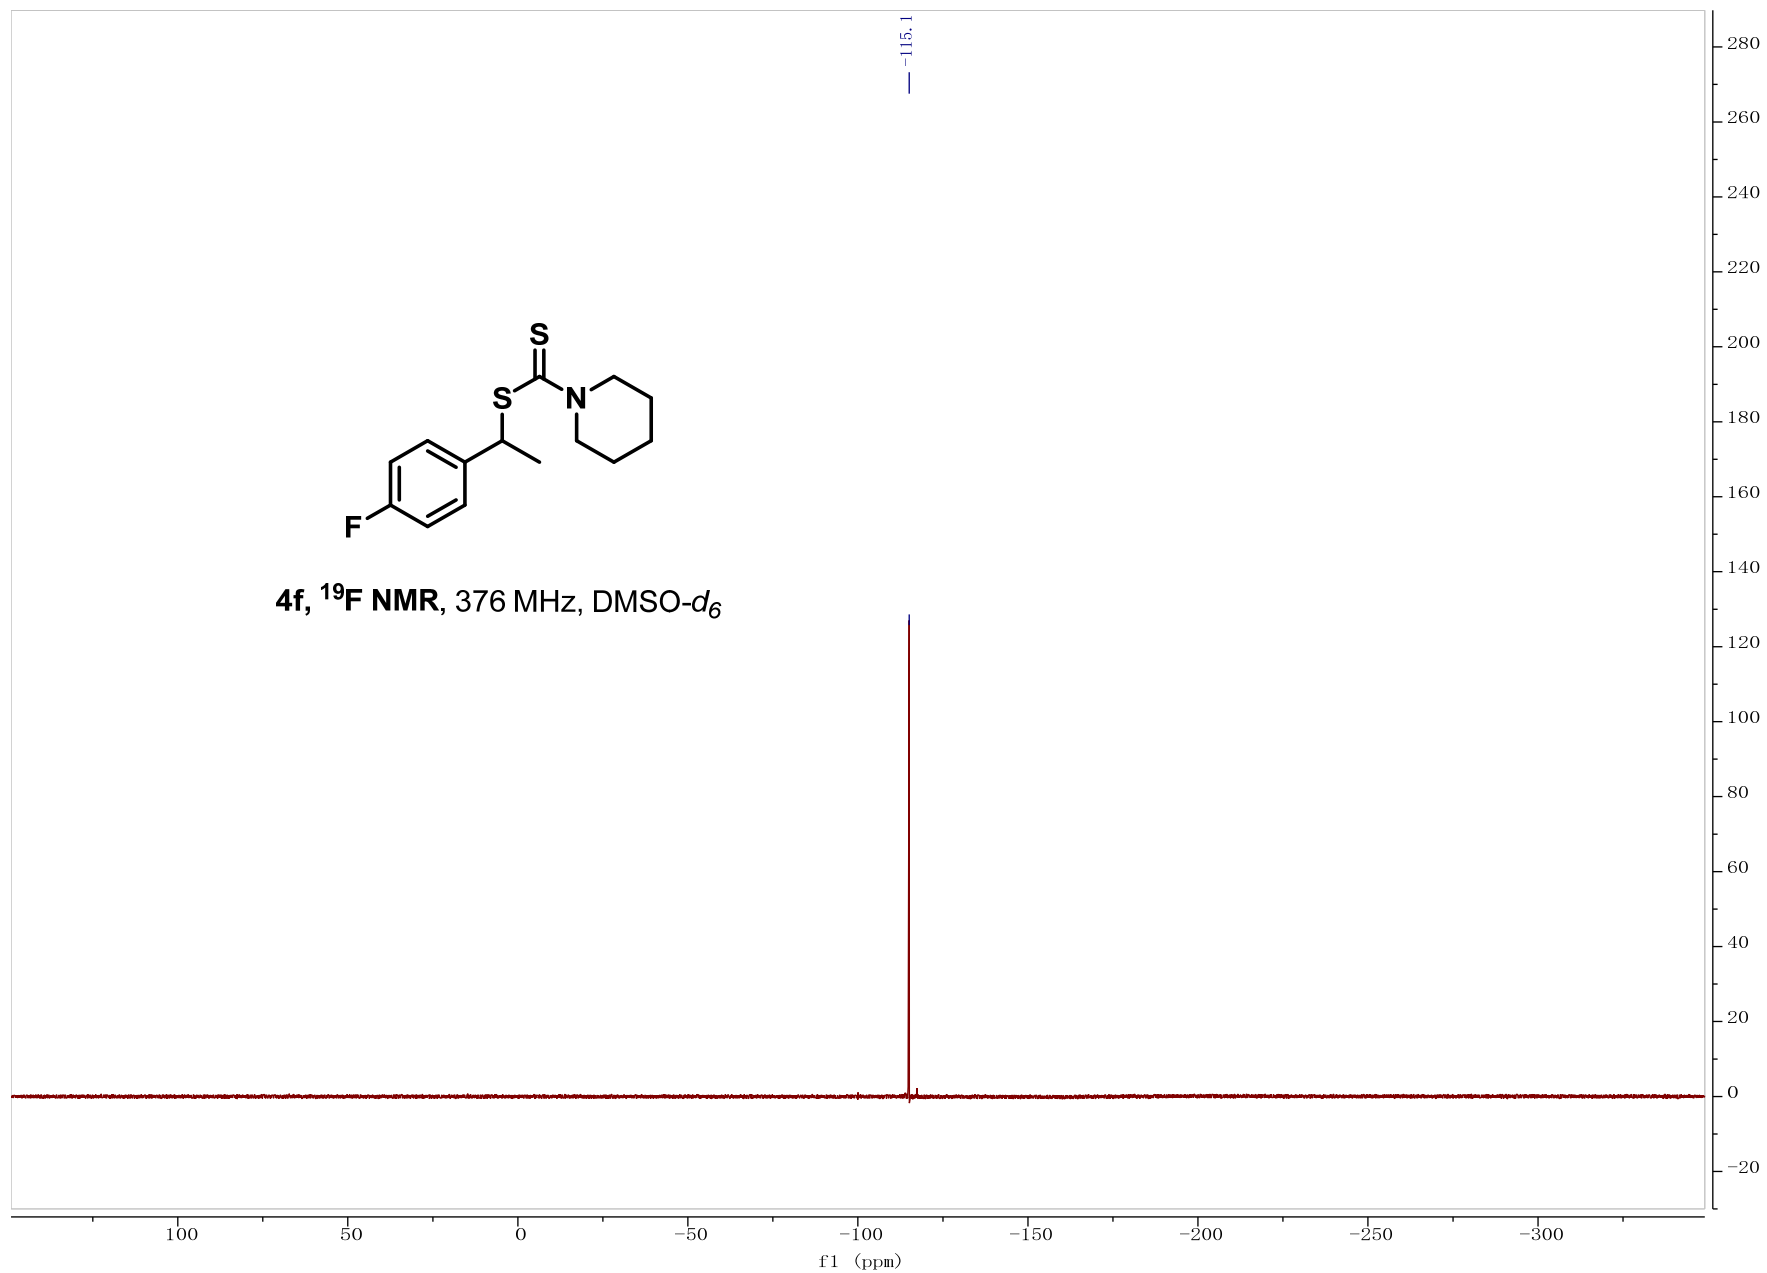

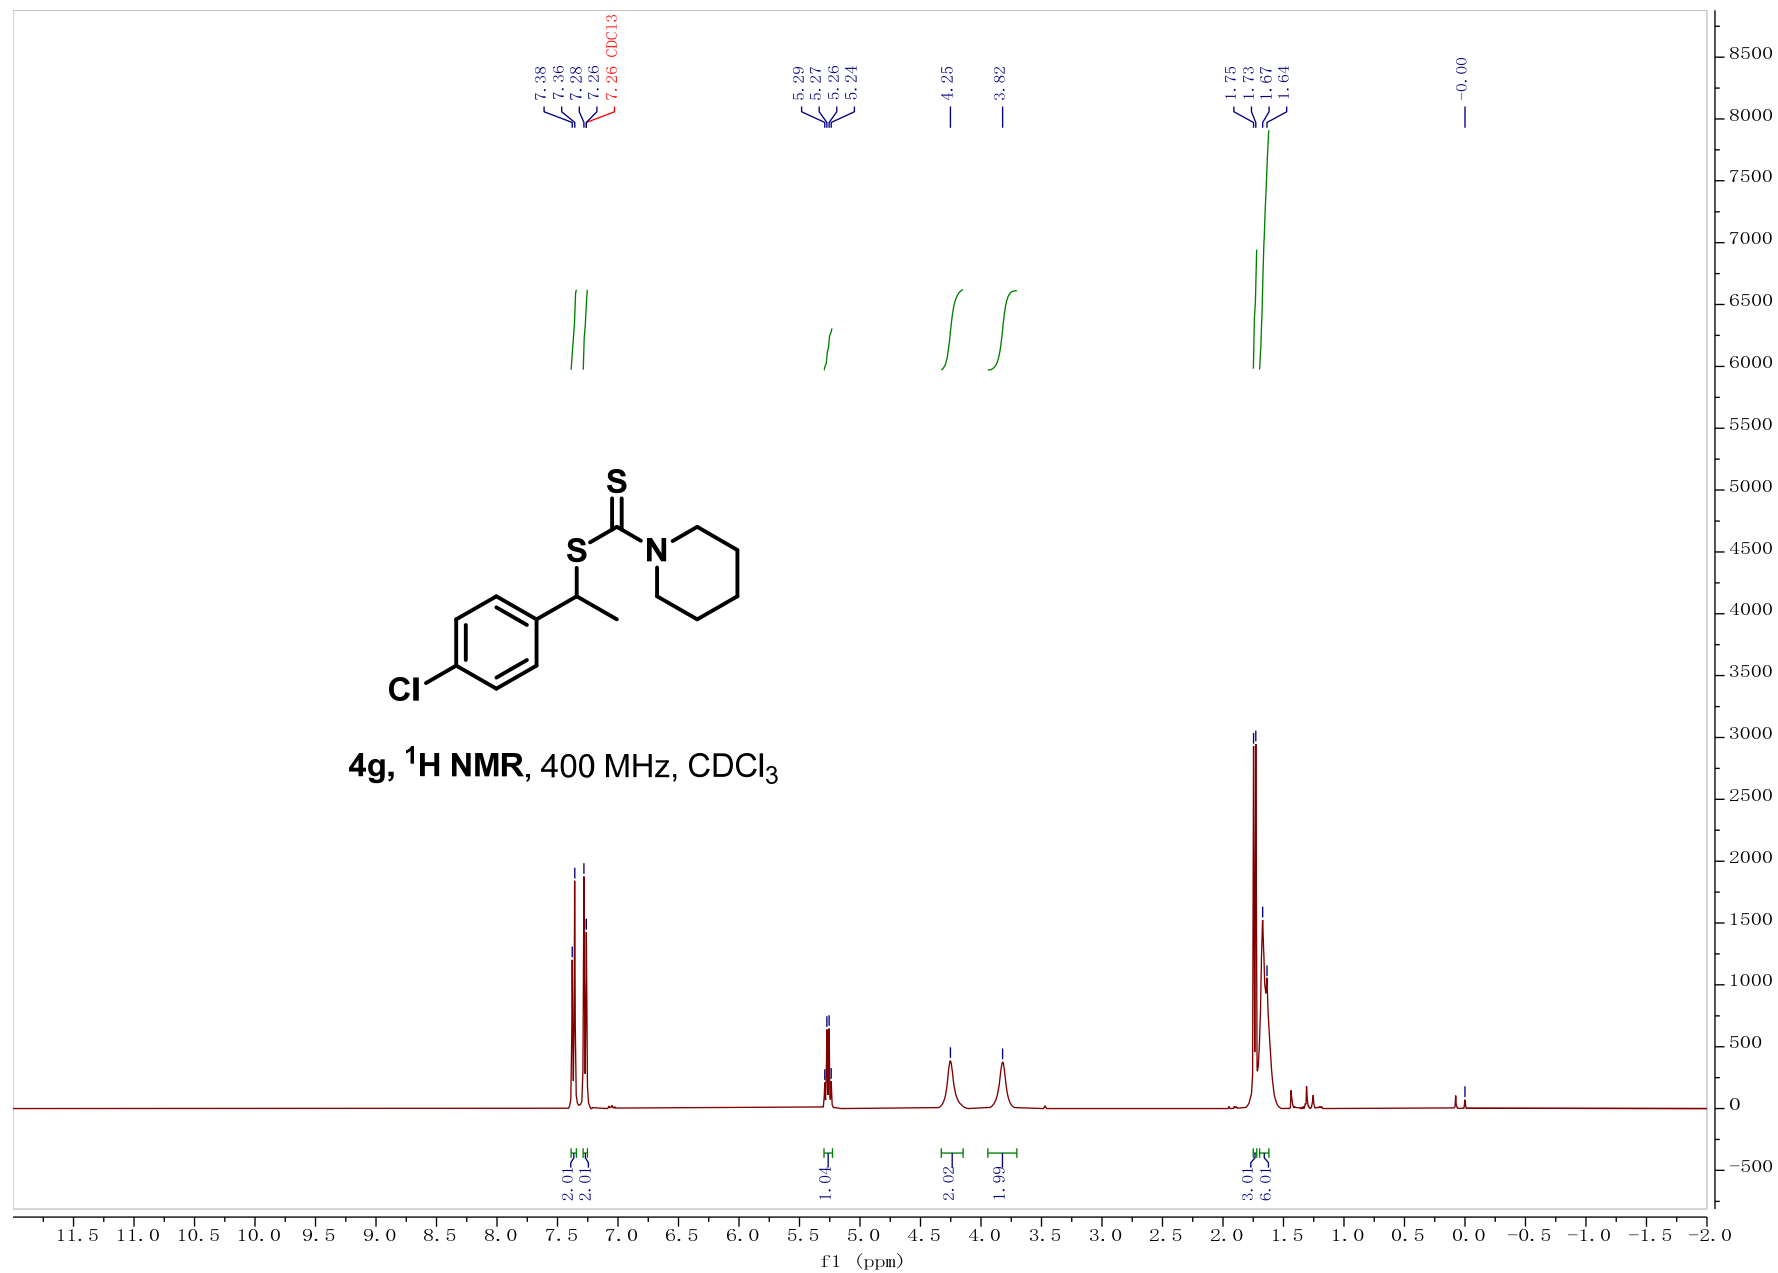

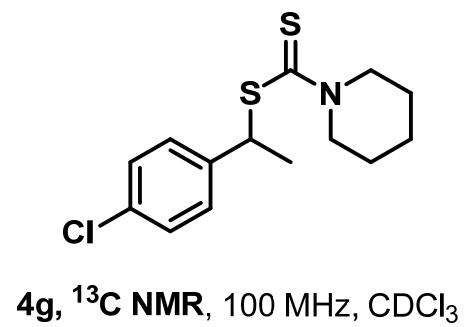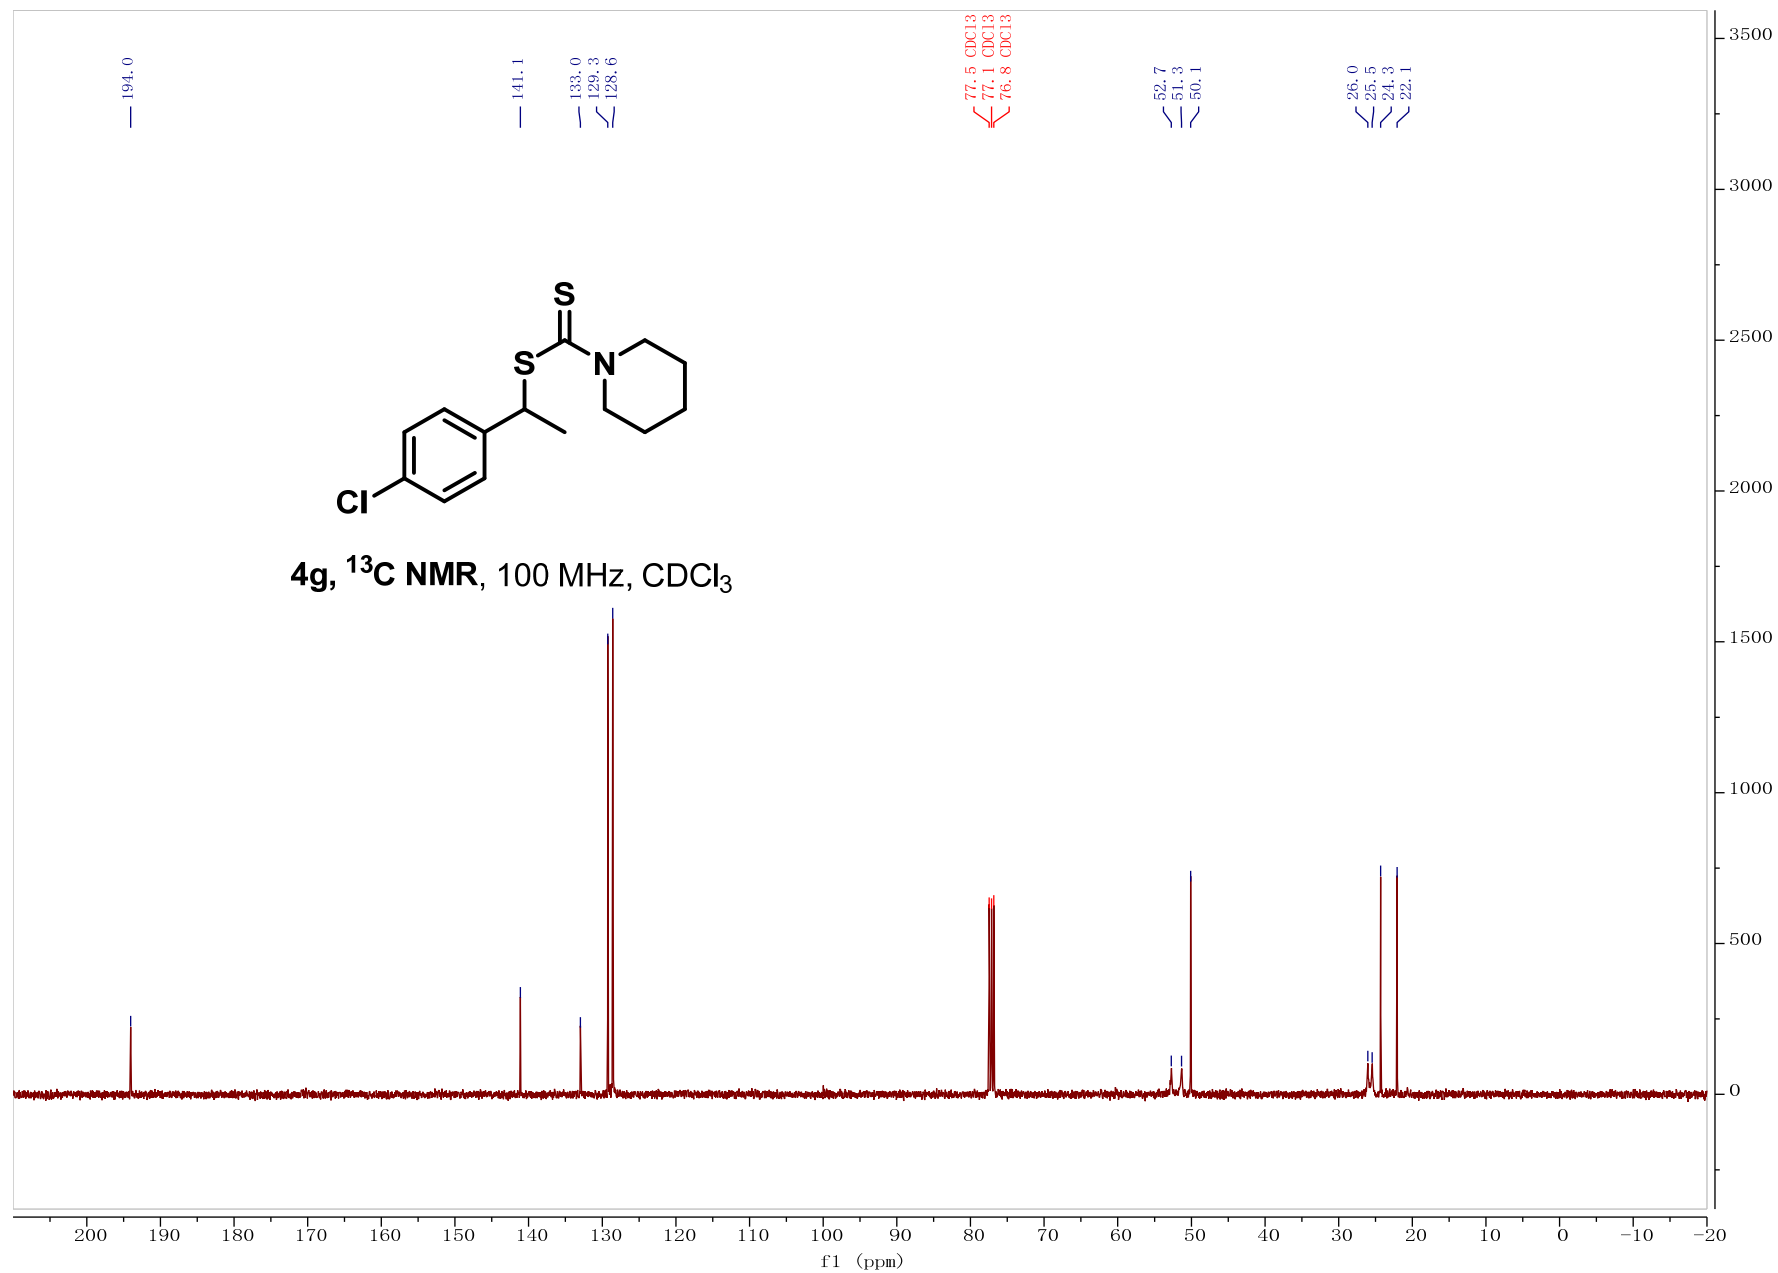

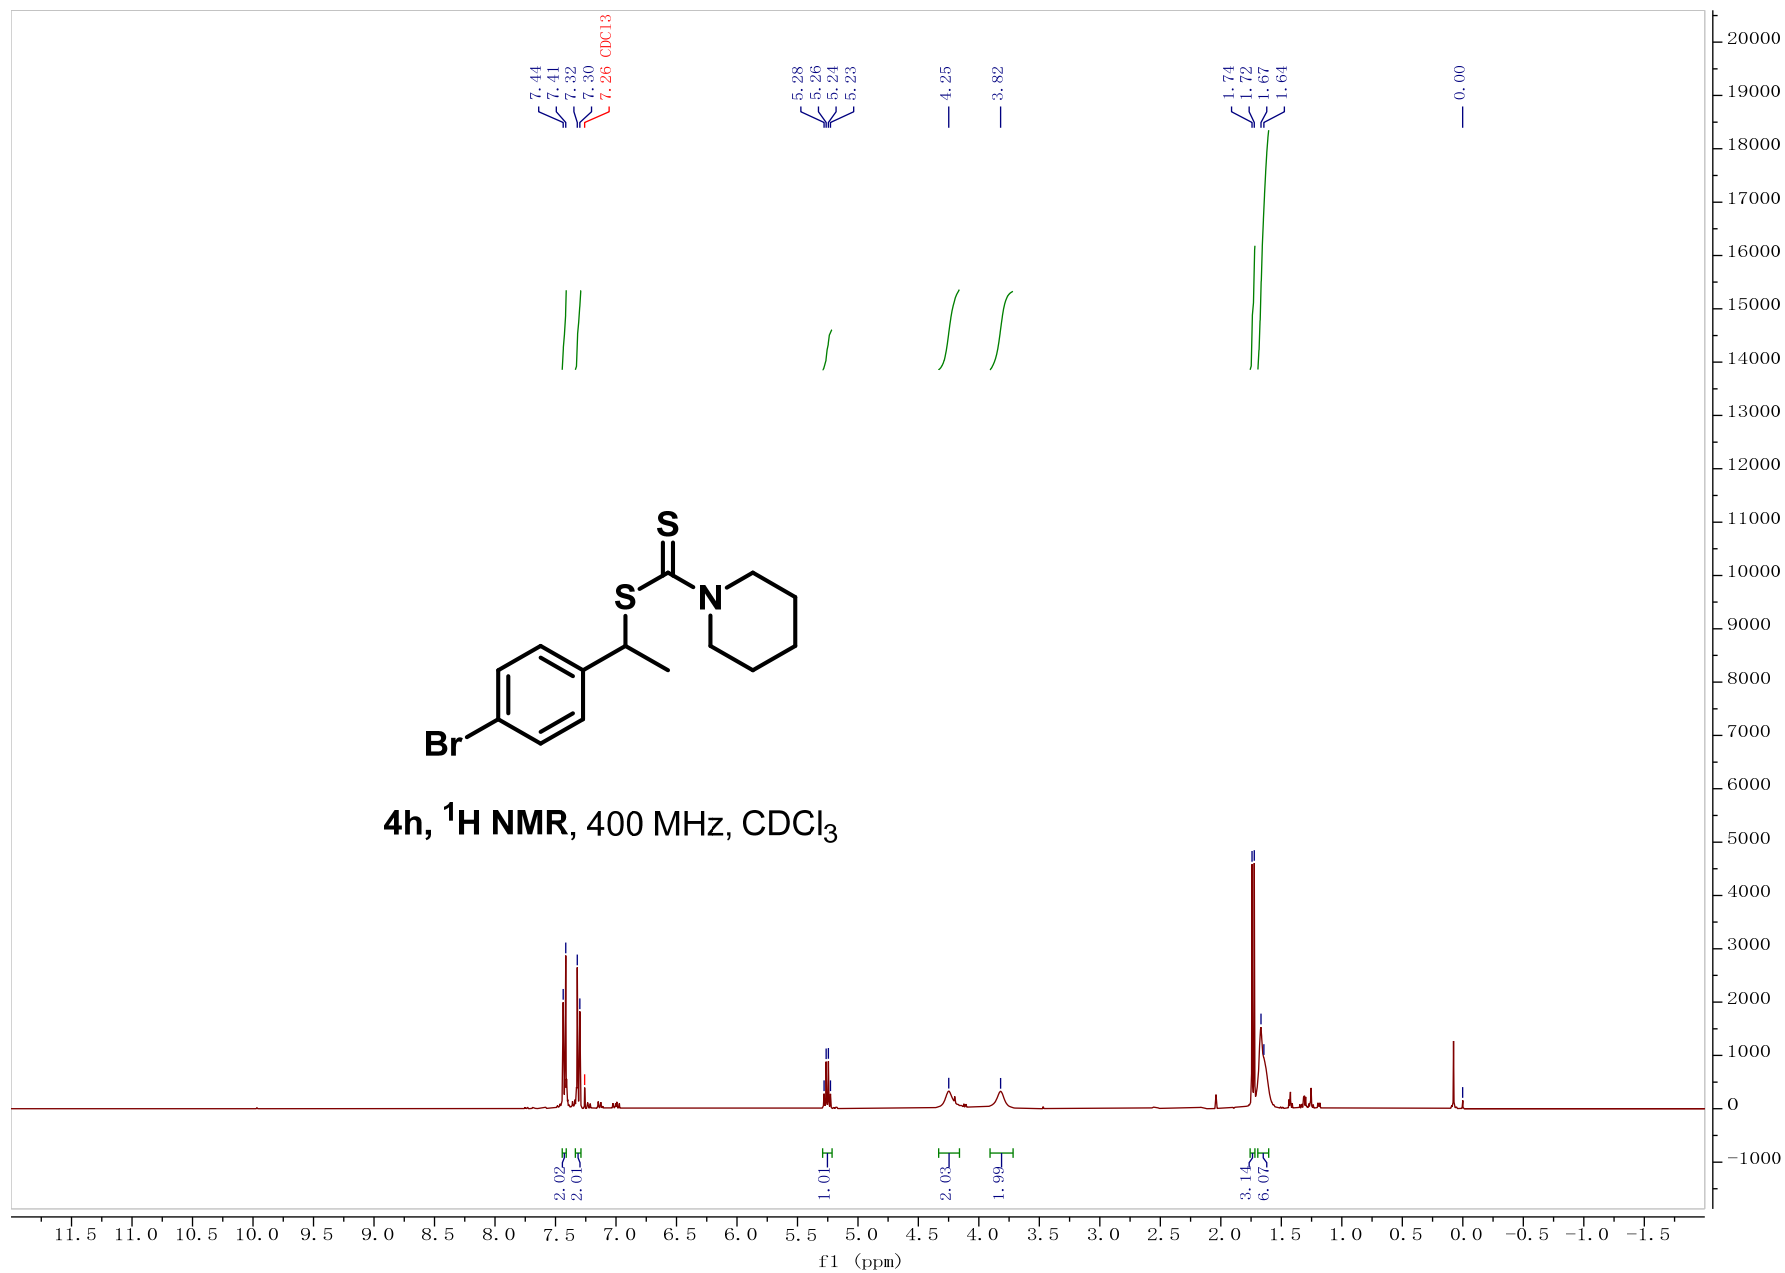

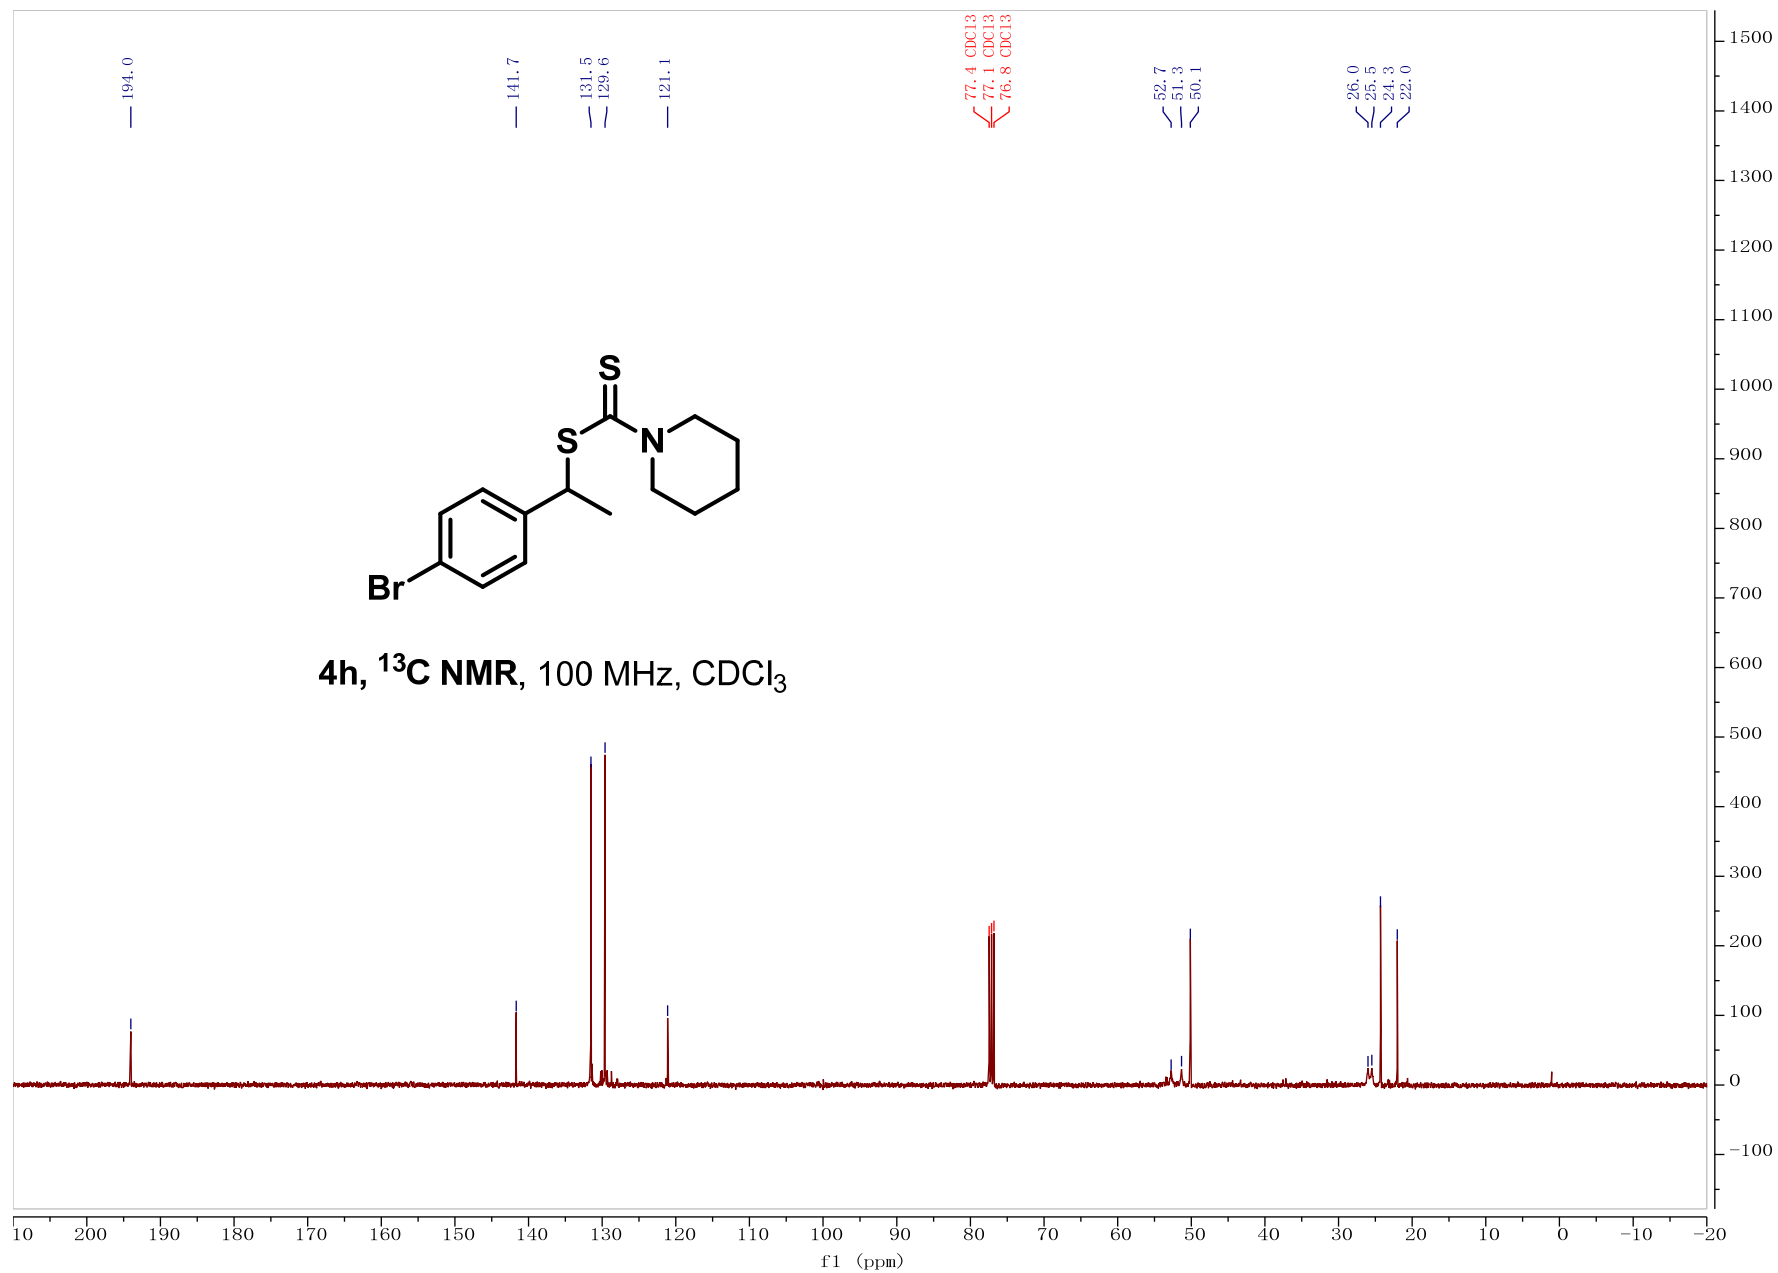

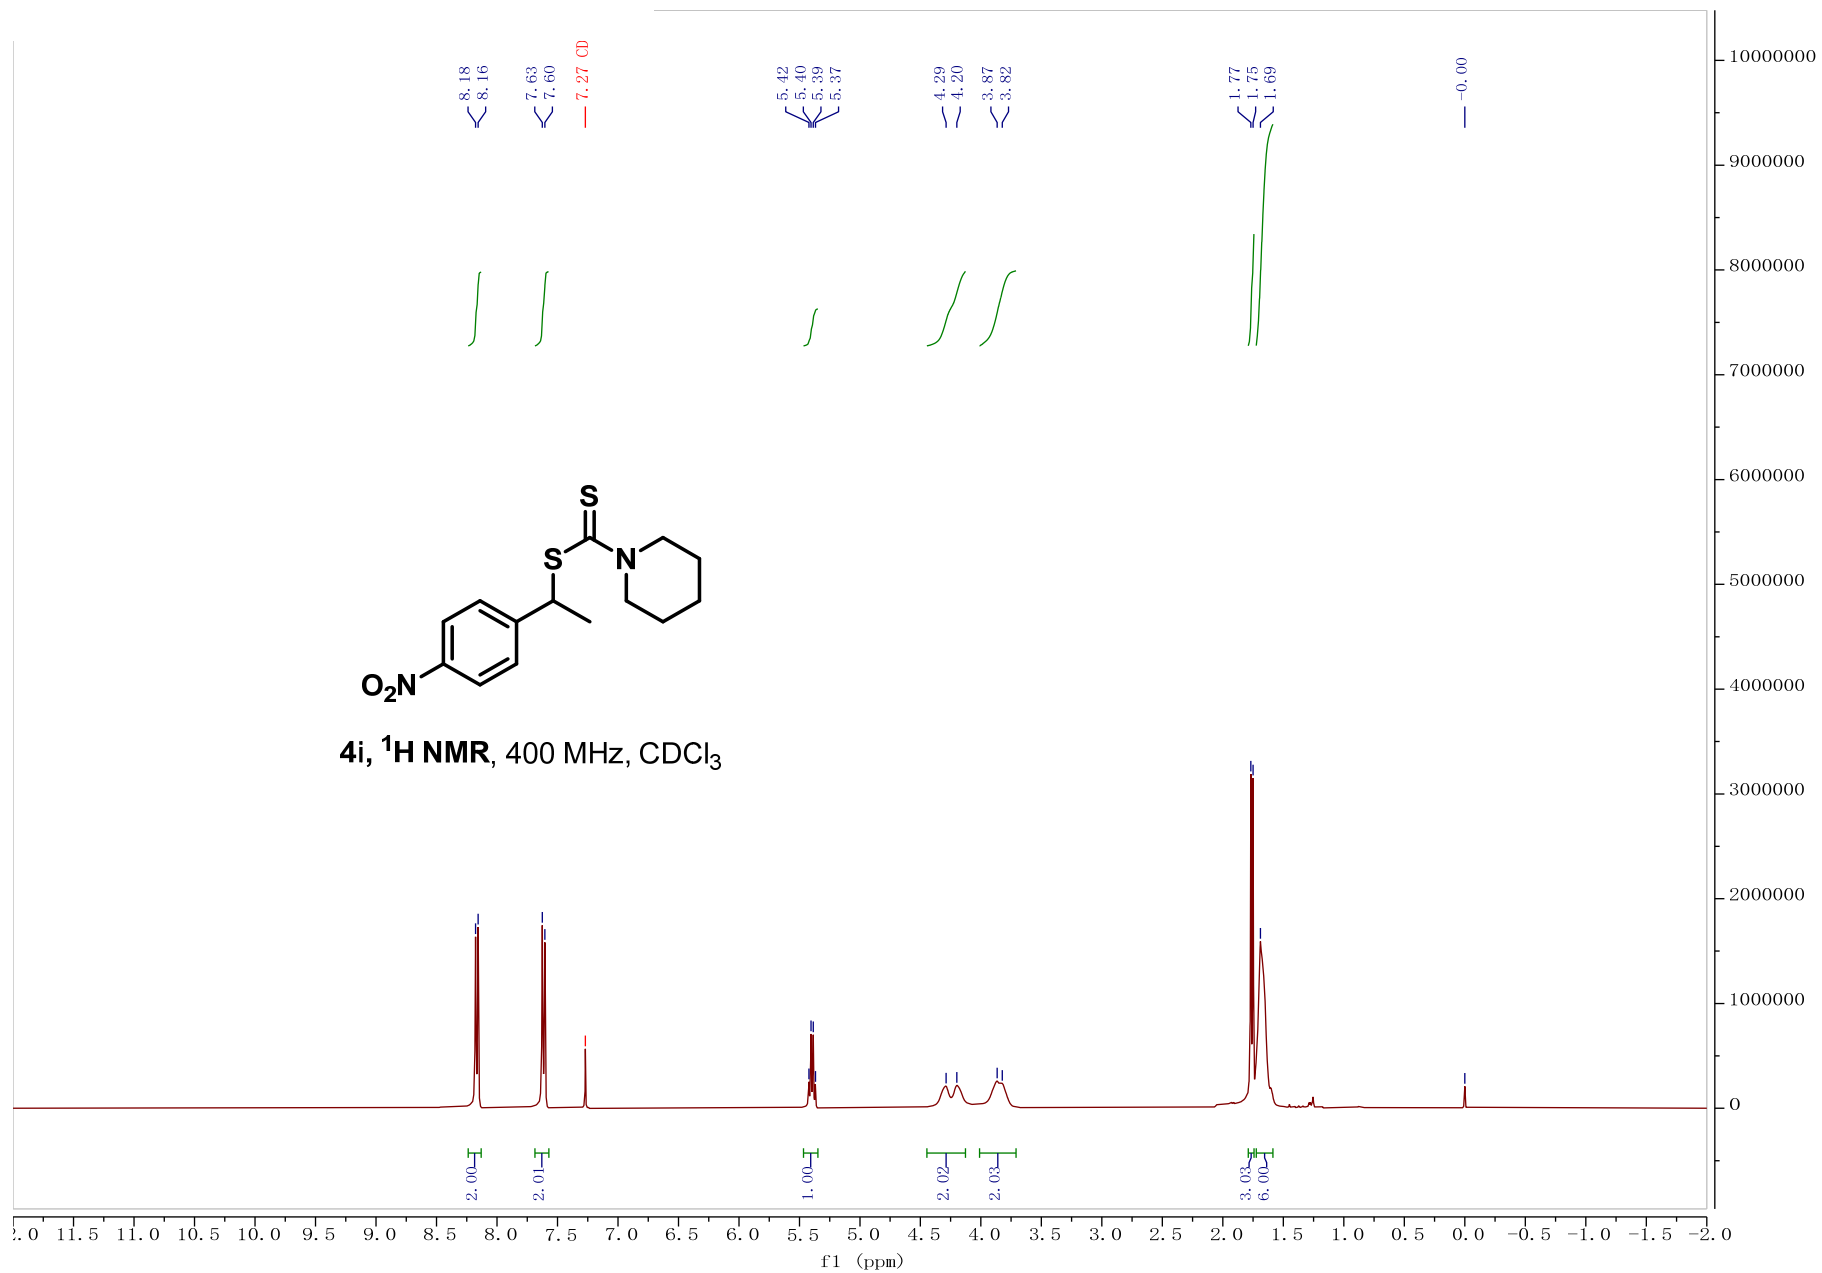

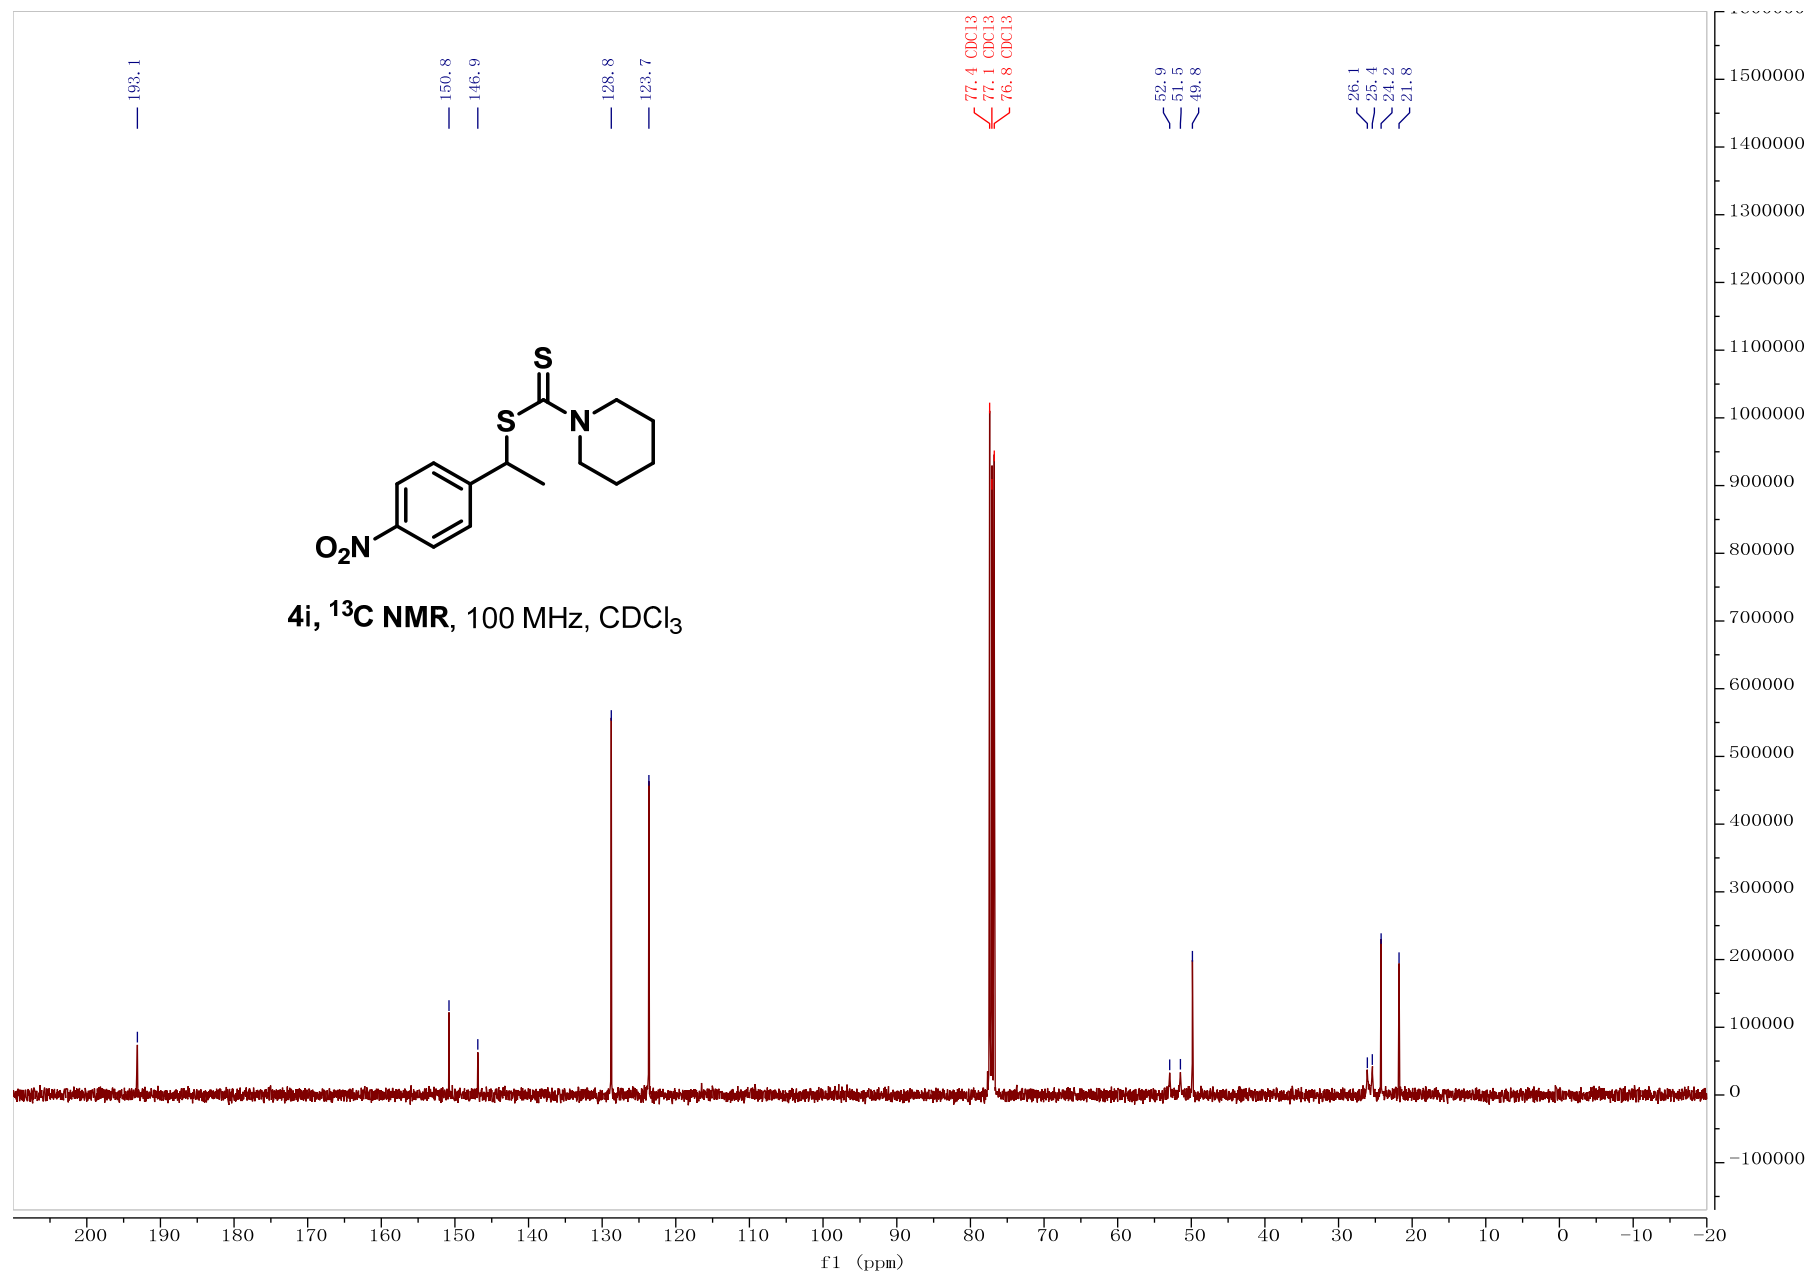

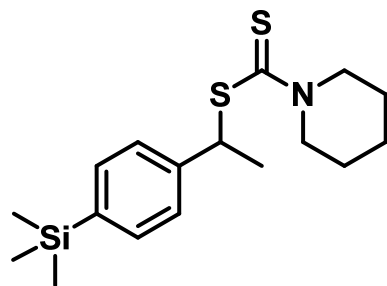

4j,  $^1\text{H}$  NMR, 400 MHz,  $\text{CDCl}_3$

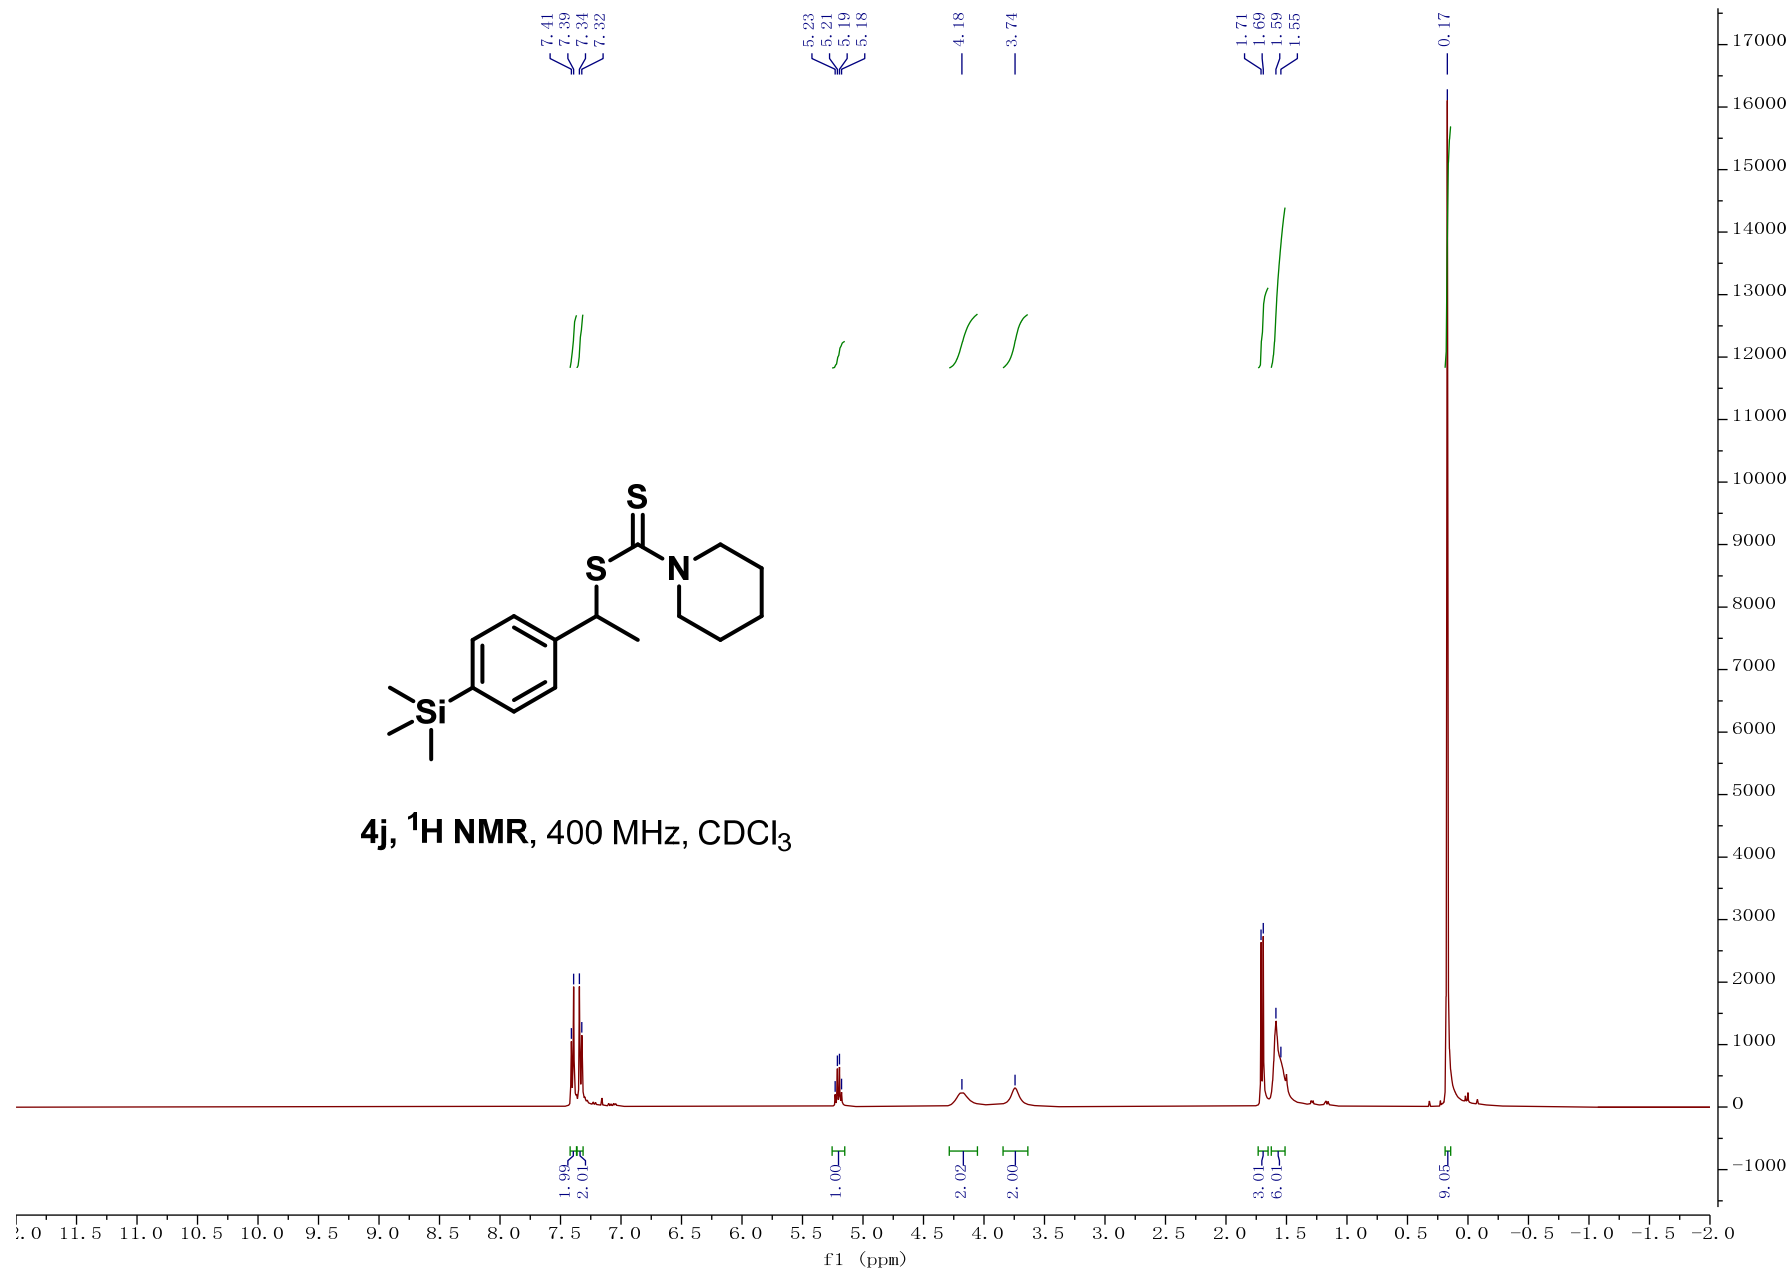

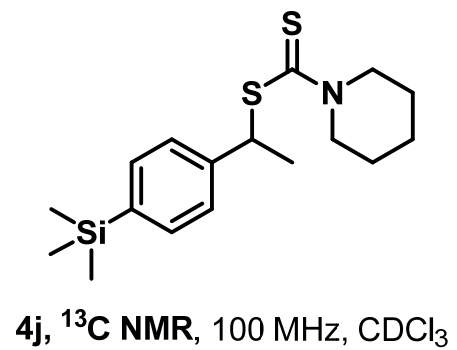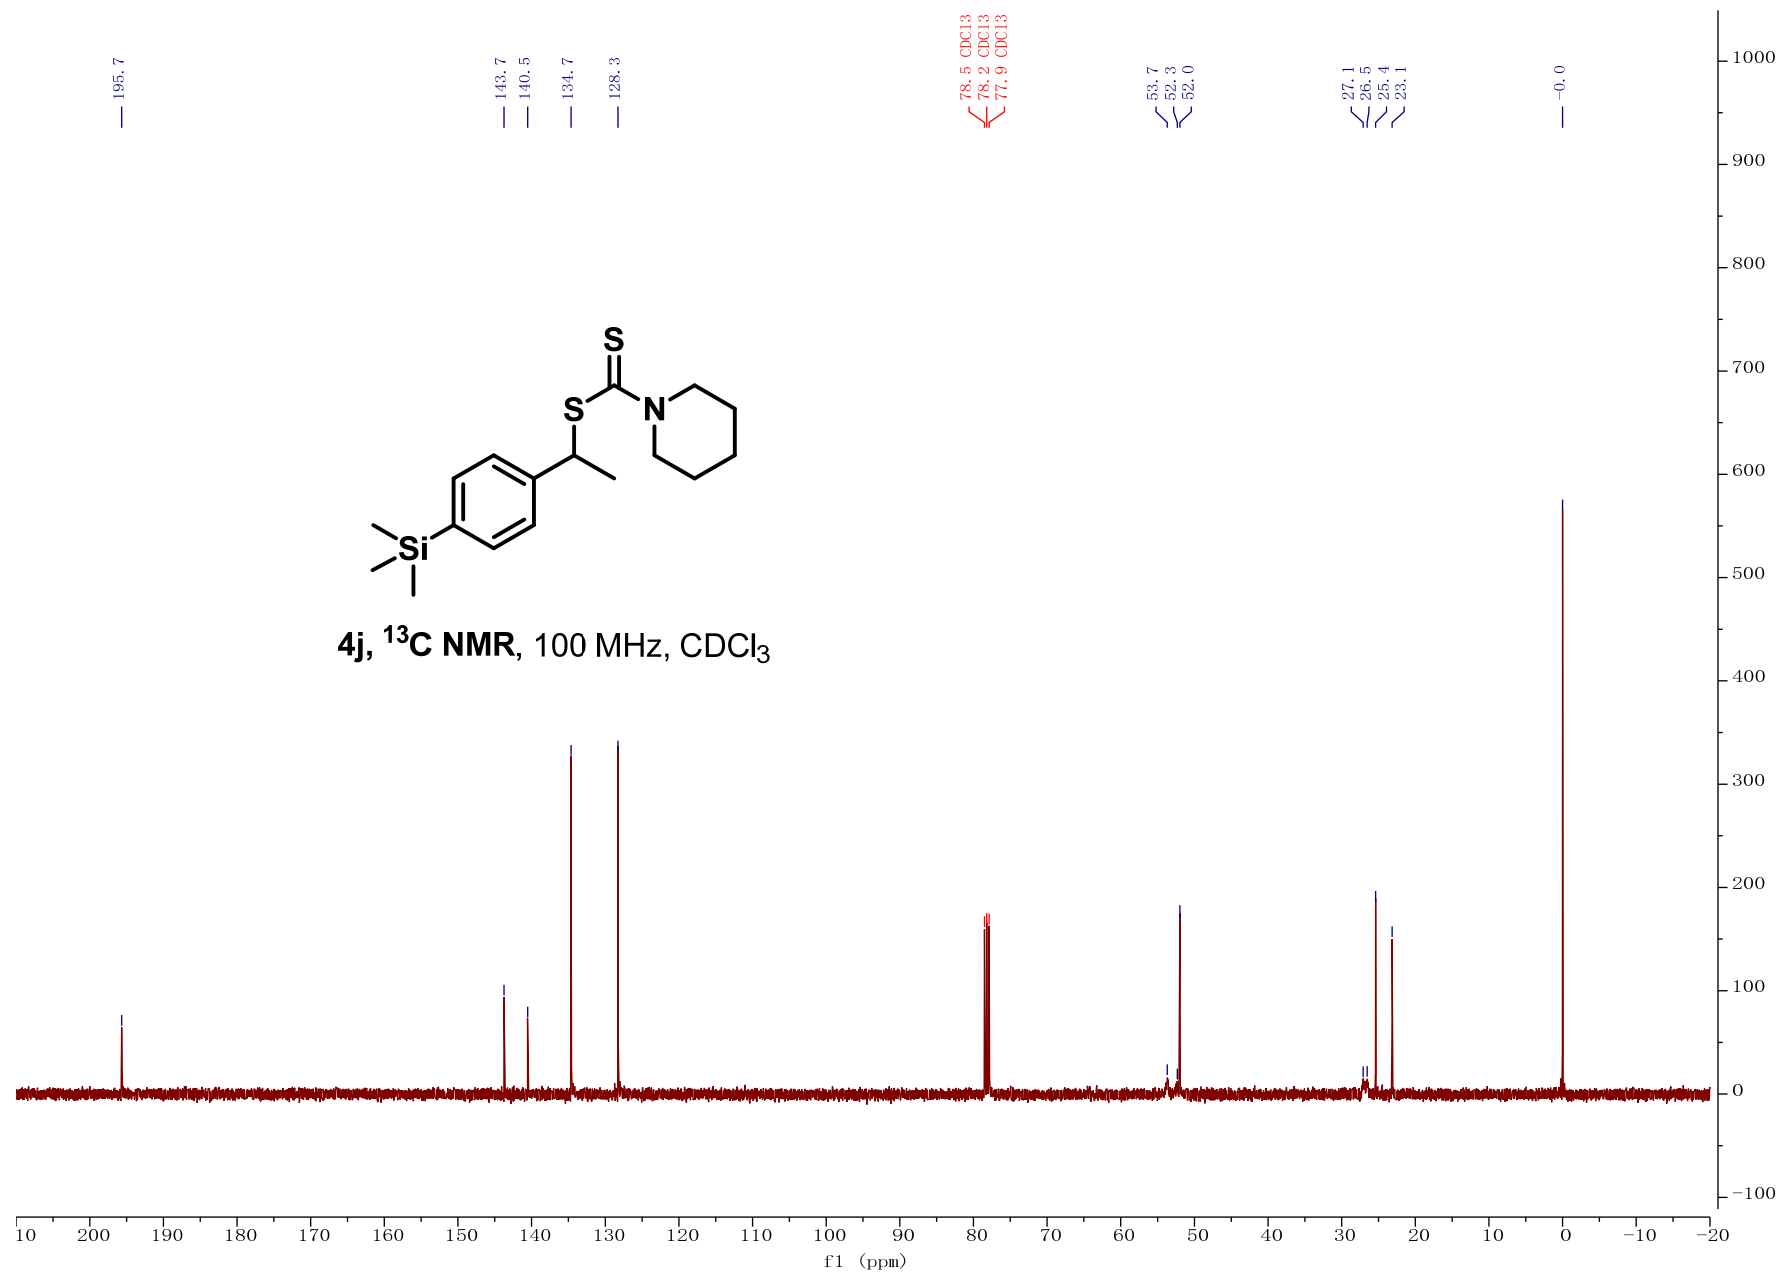

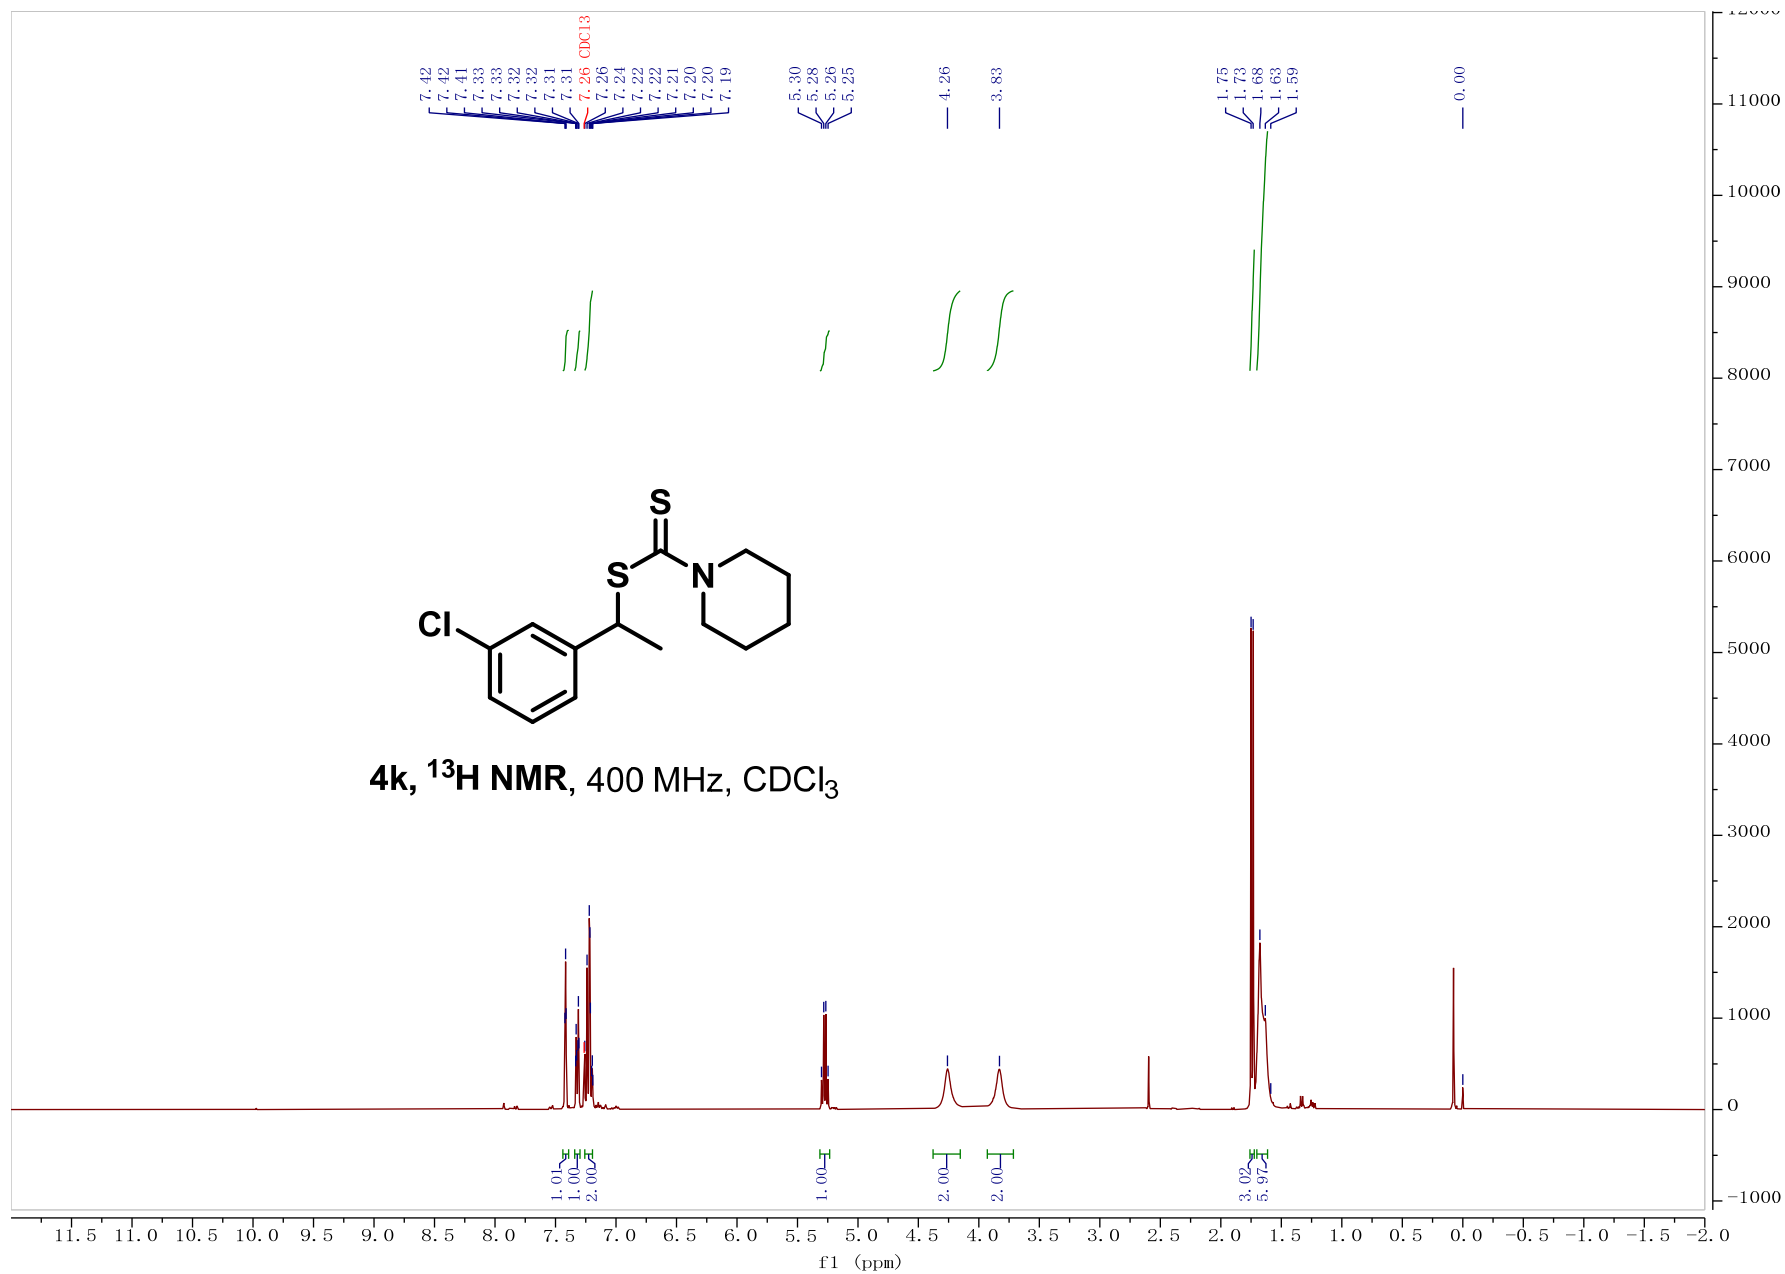

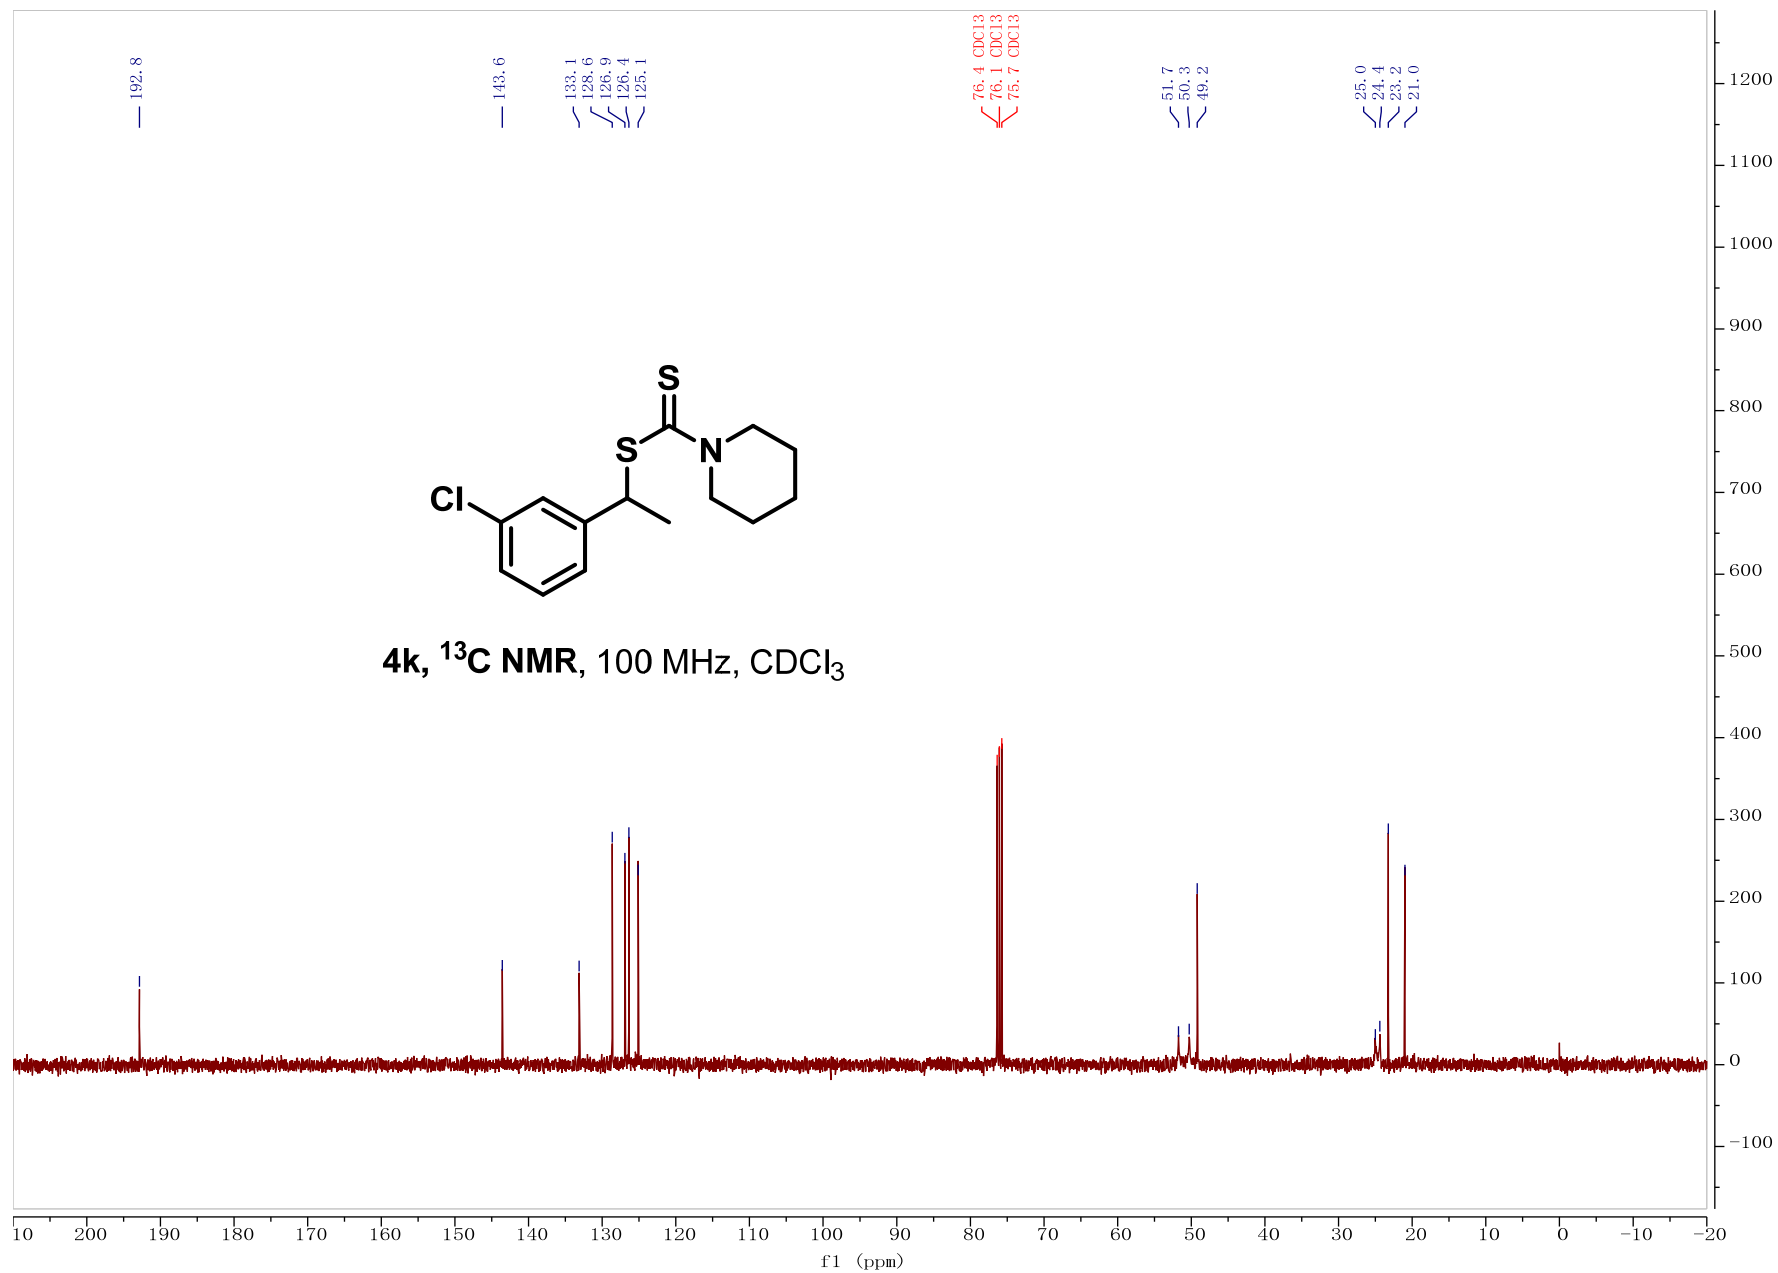

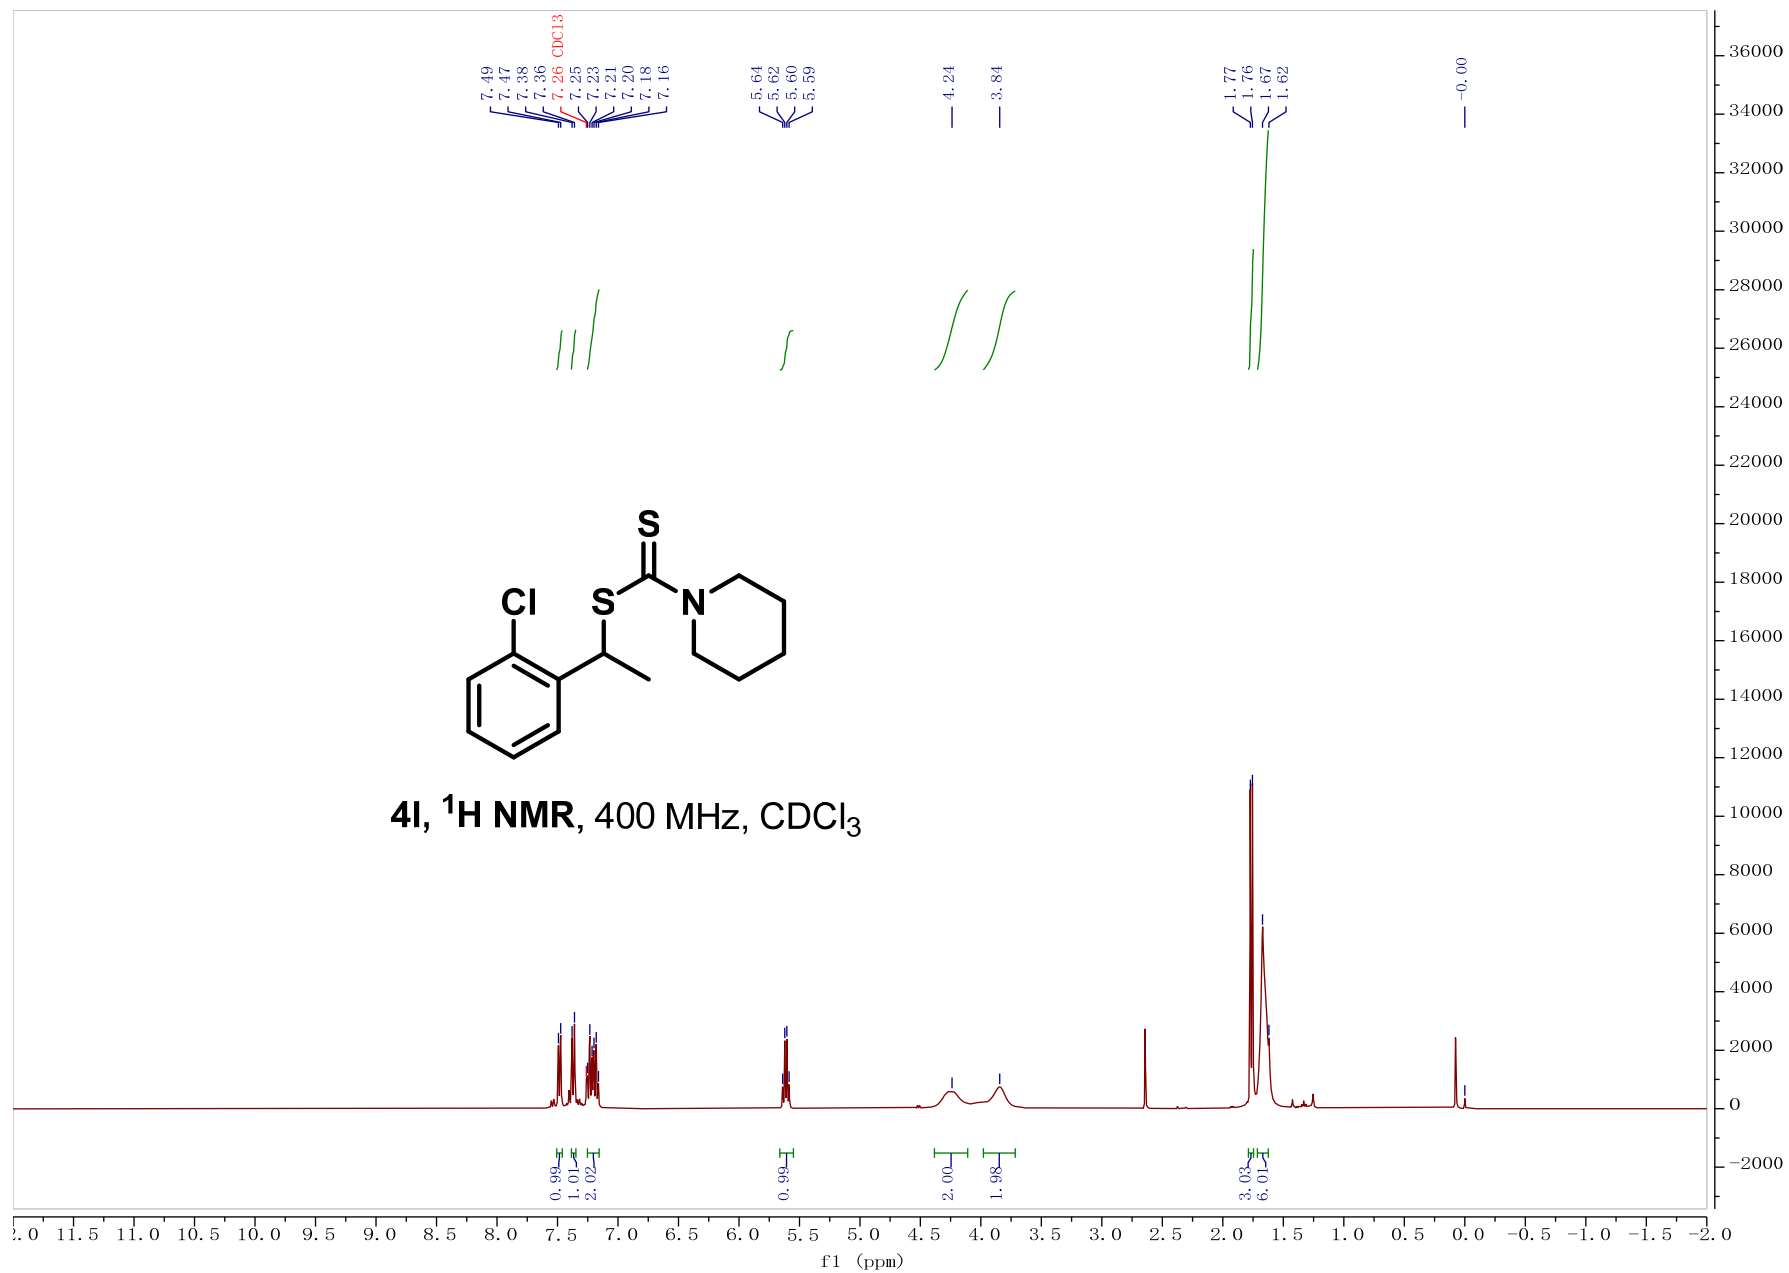

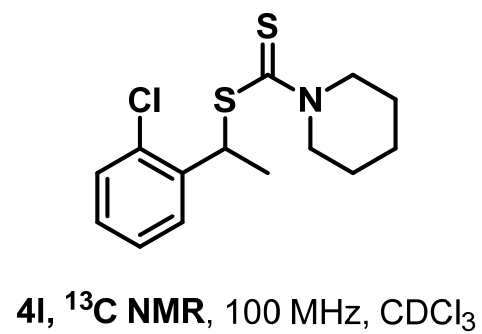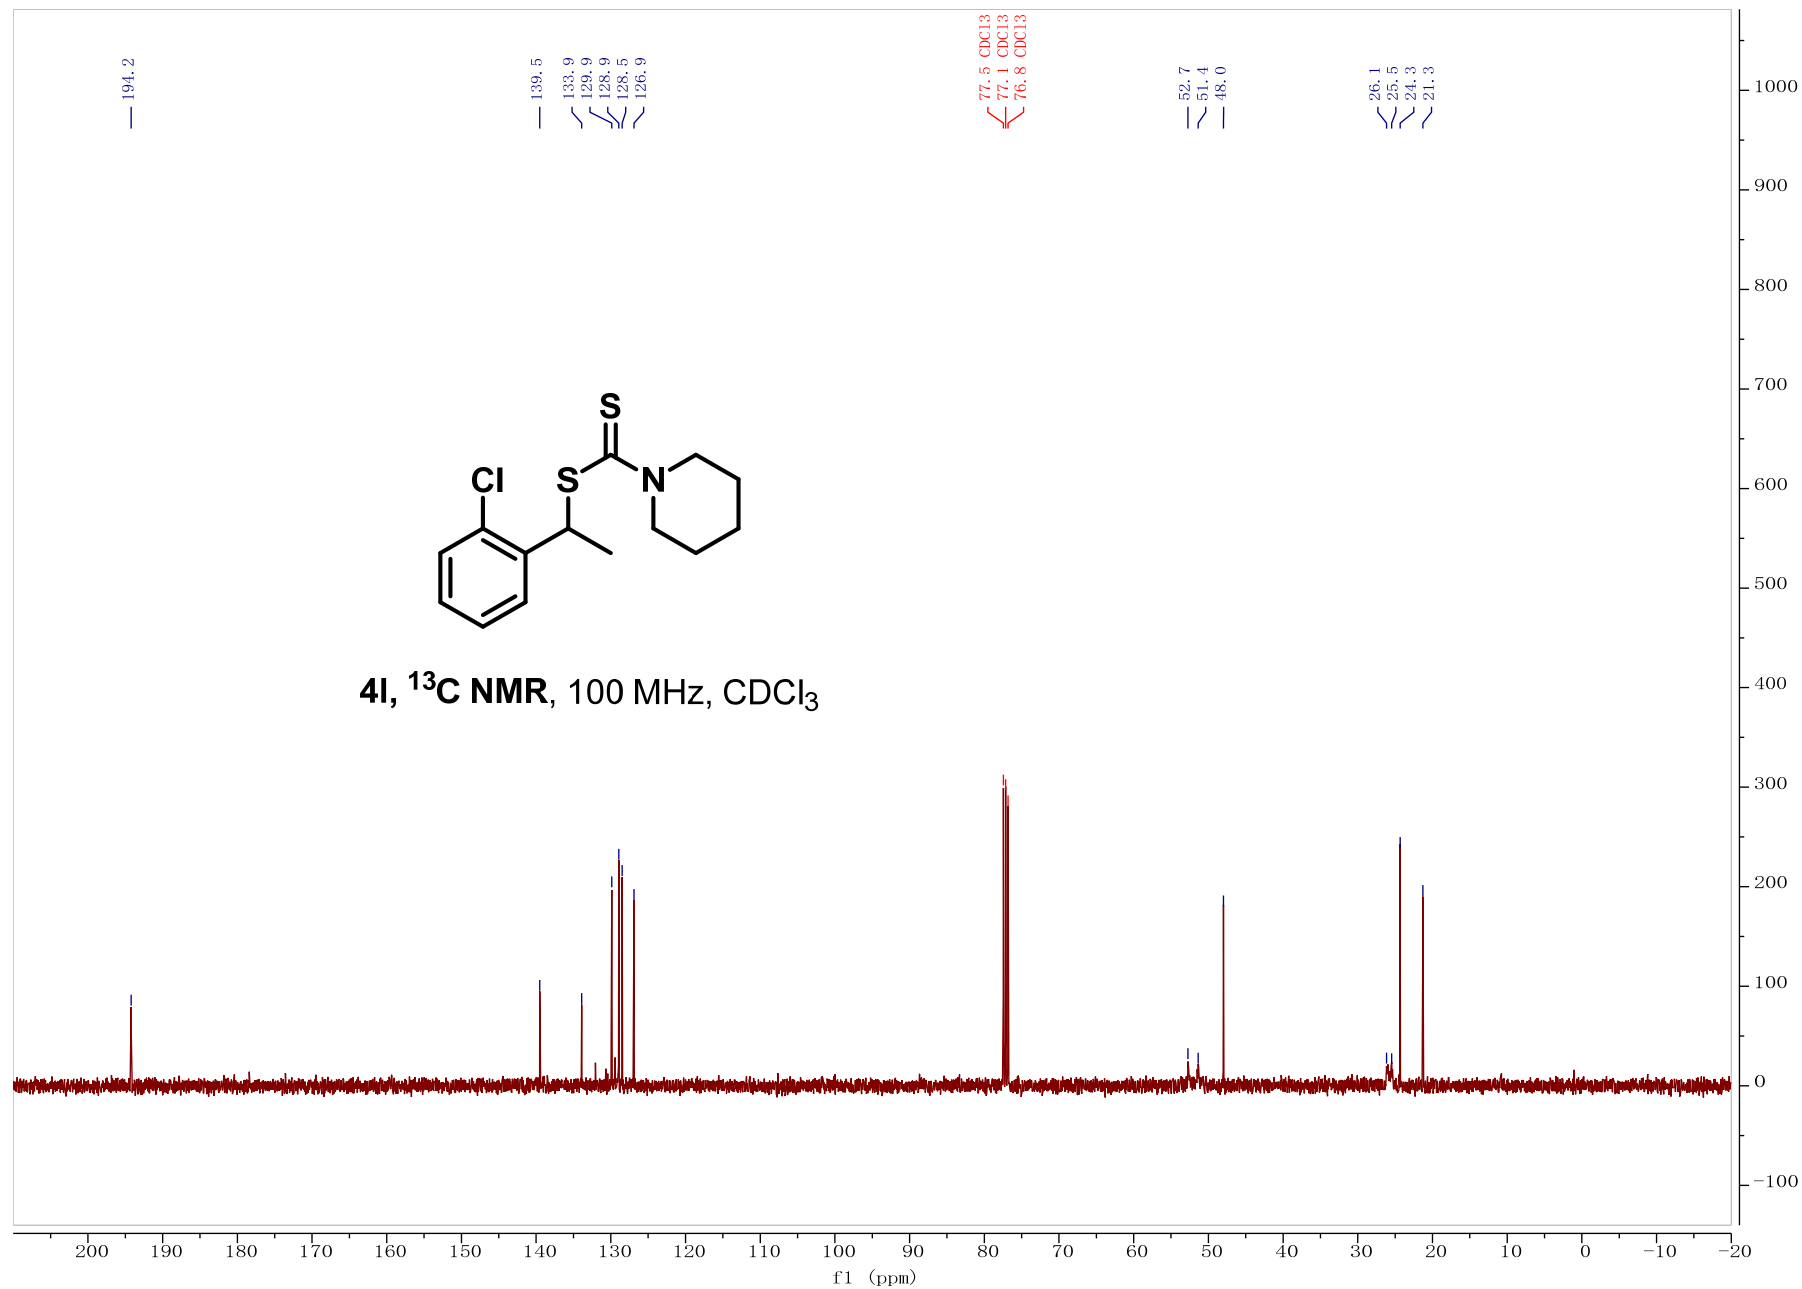

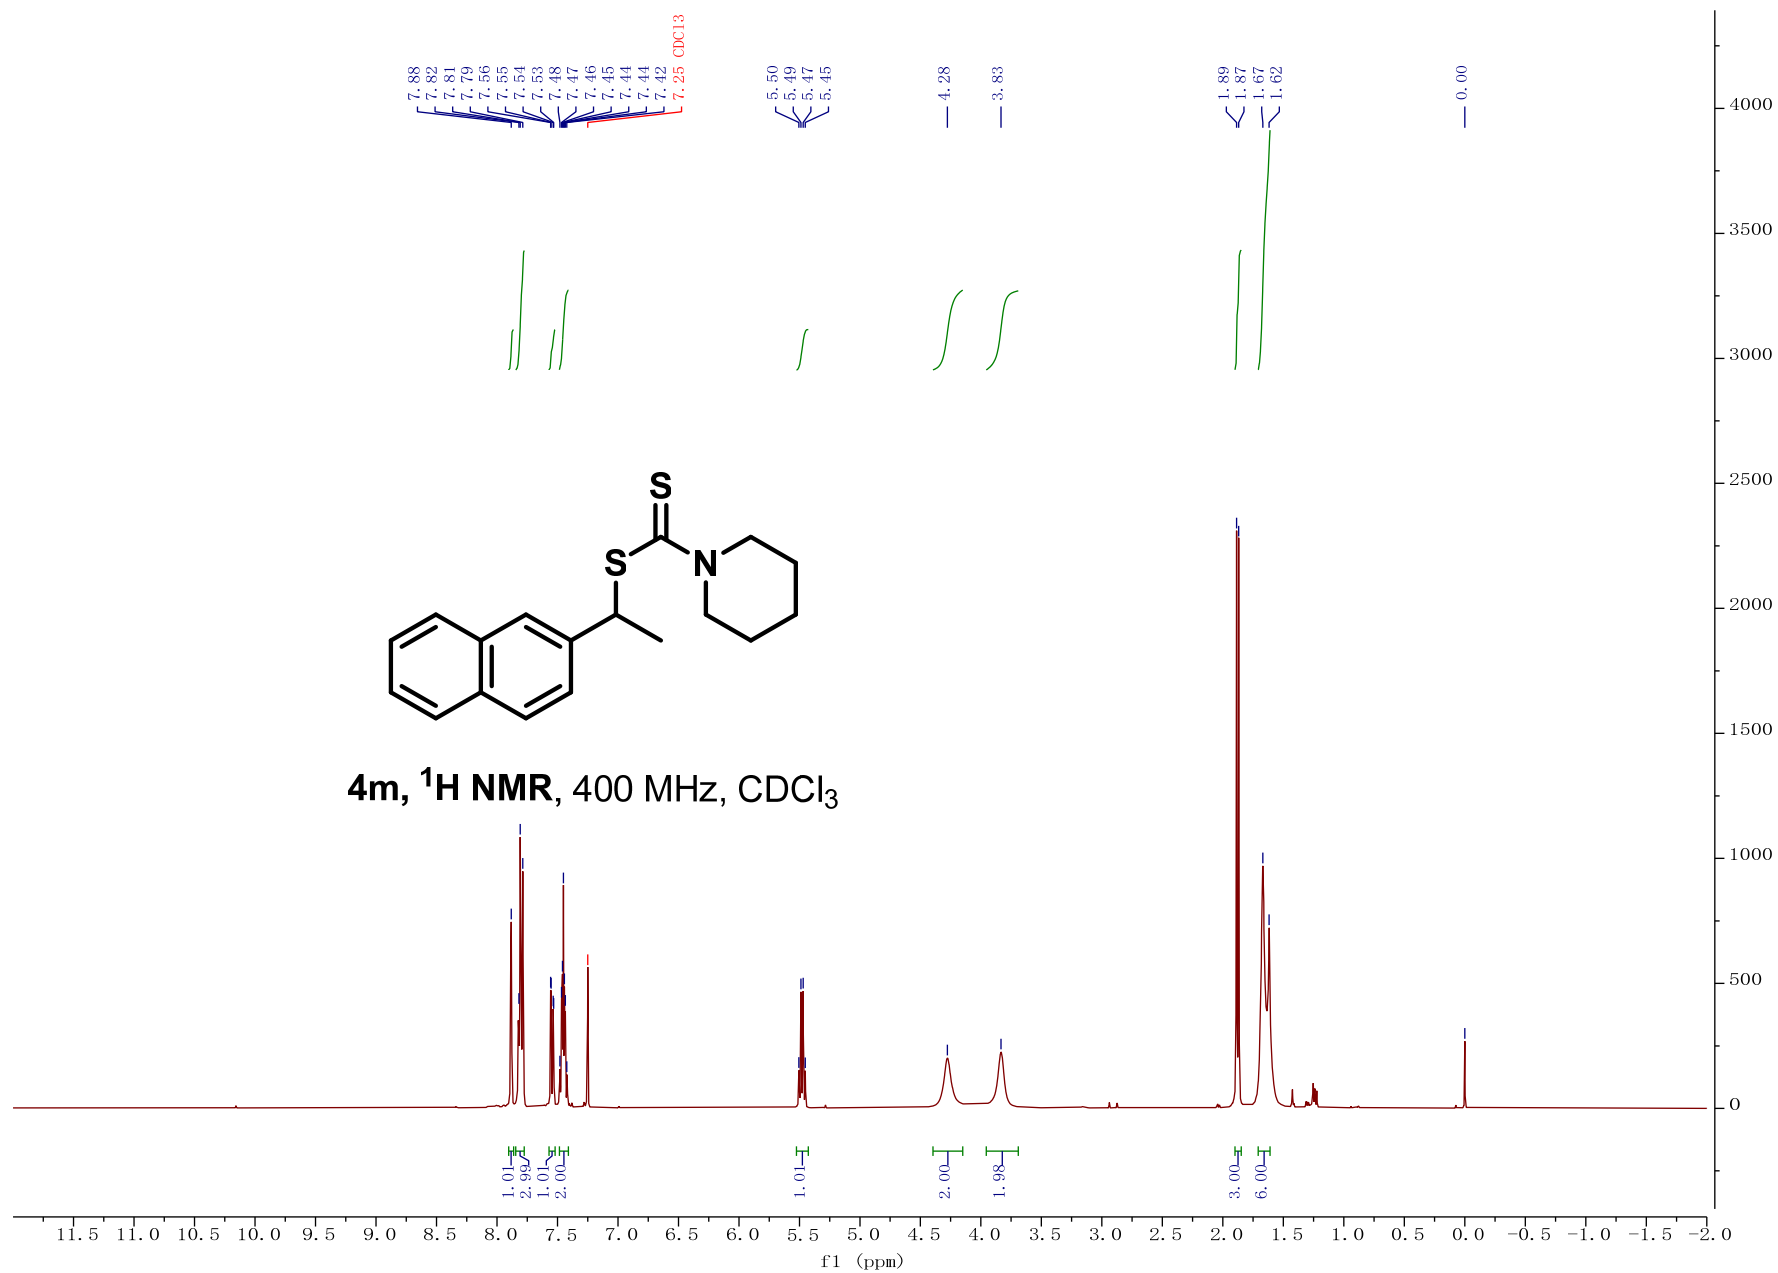

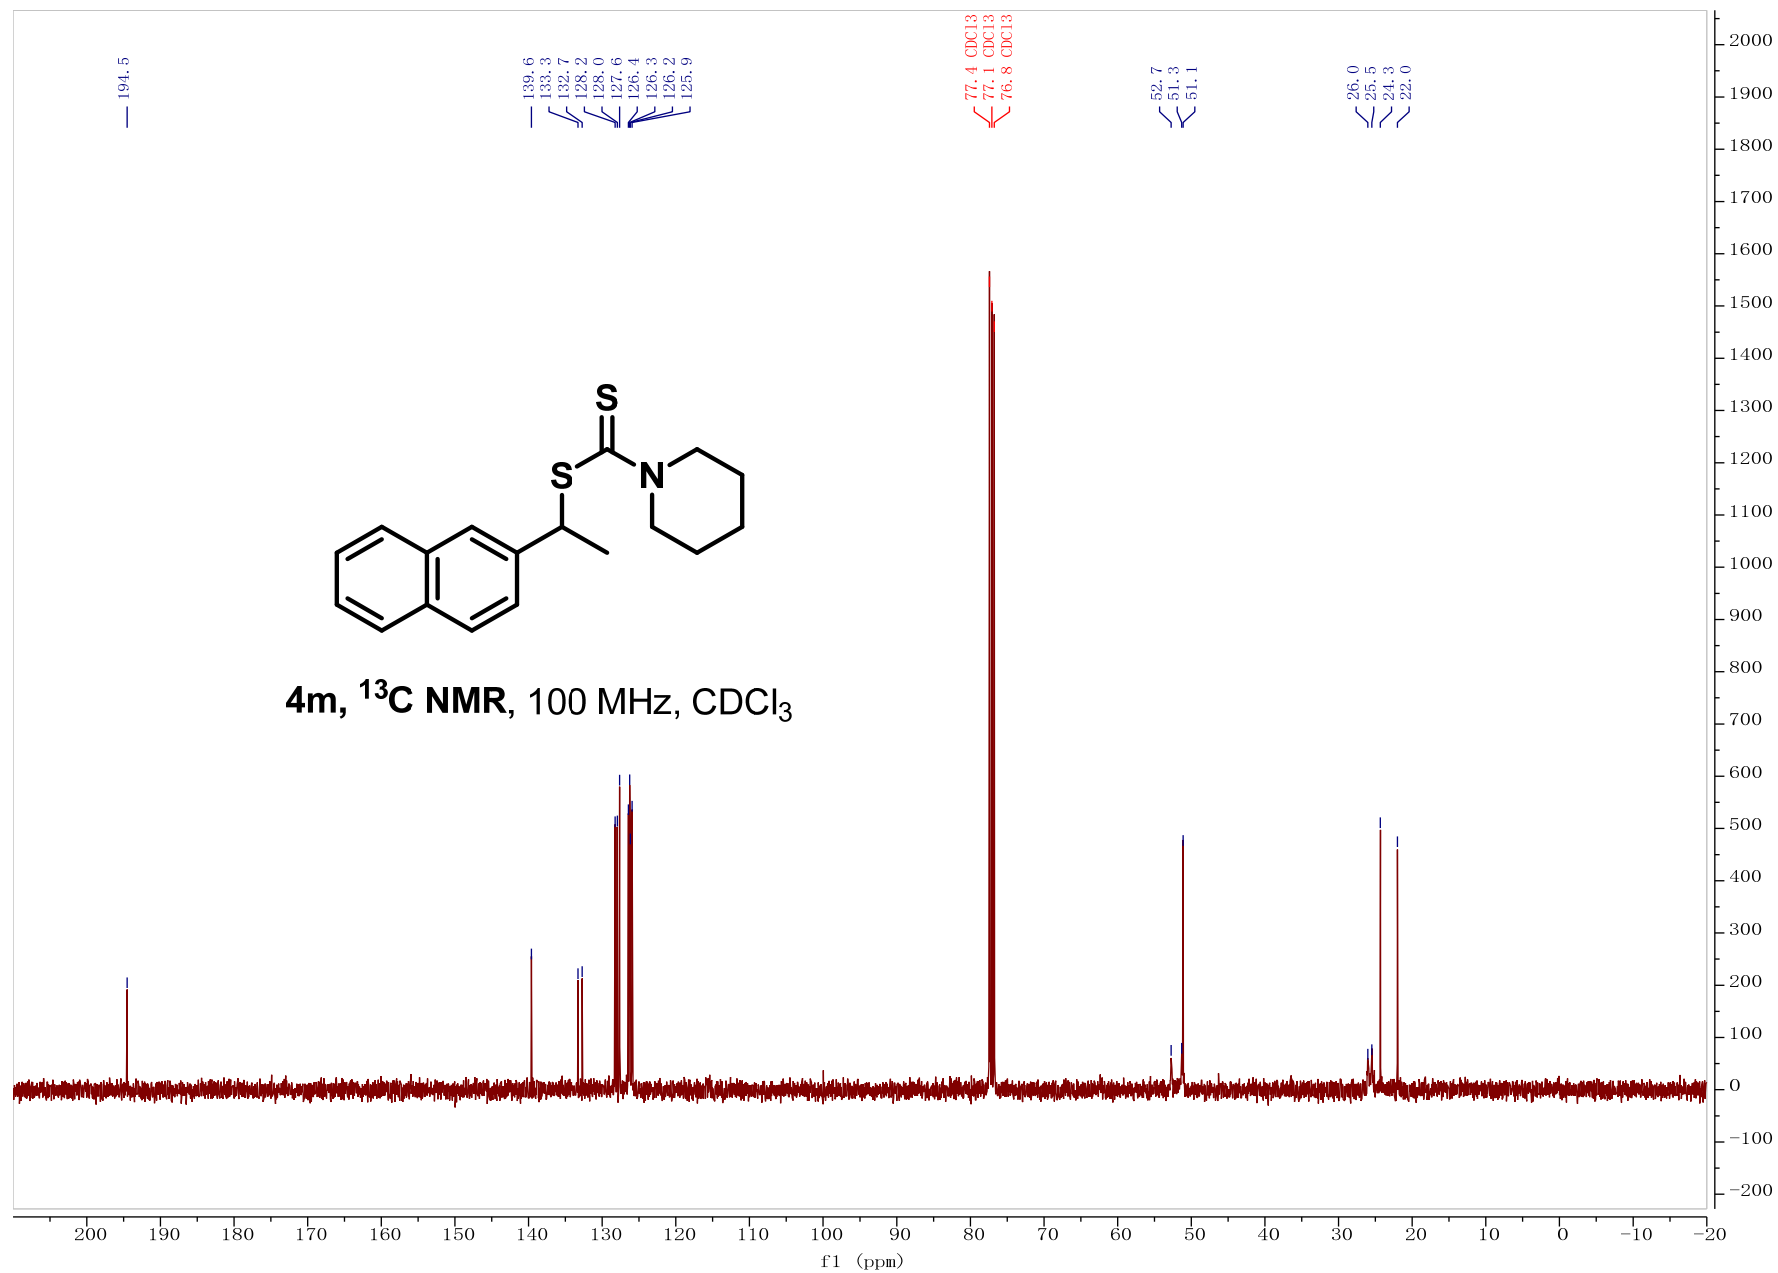

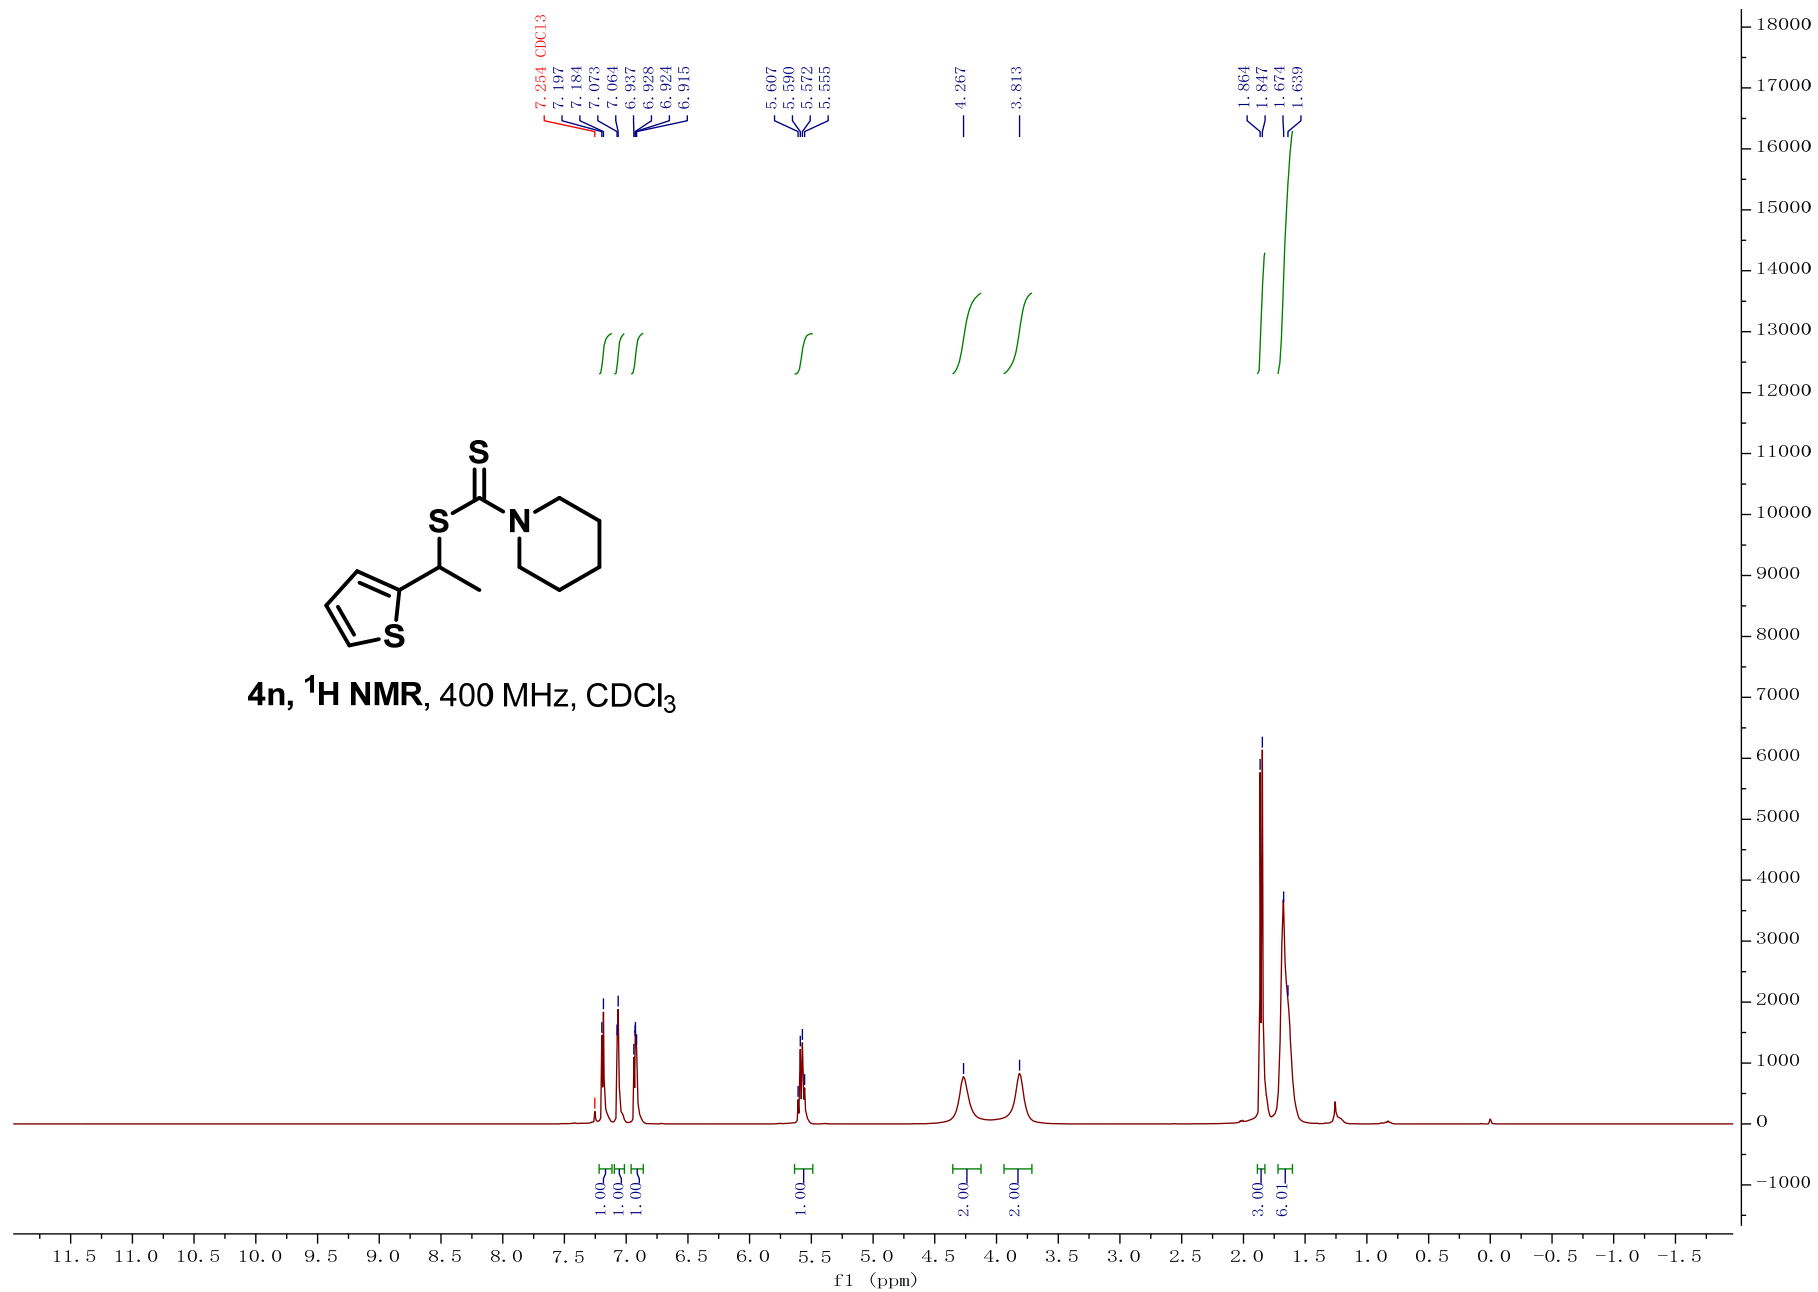

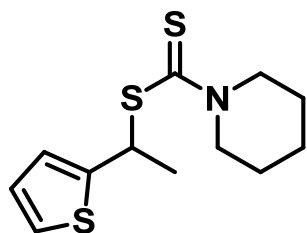

4n,  $^{13}\text{C}$  NMR, 100 MHz,  $\text{CDCl}_3$

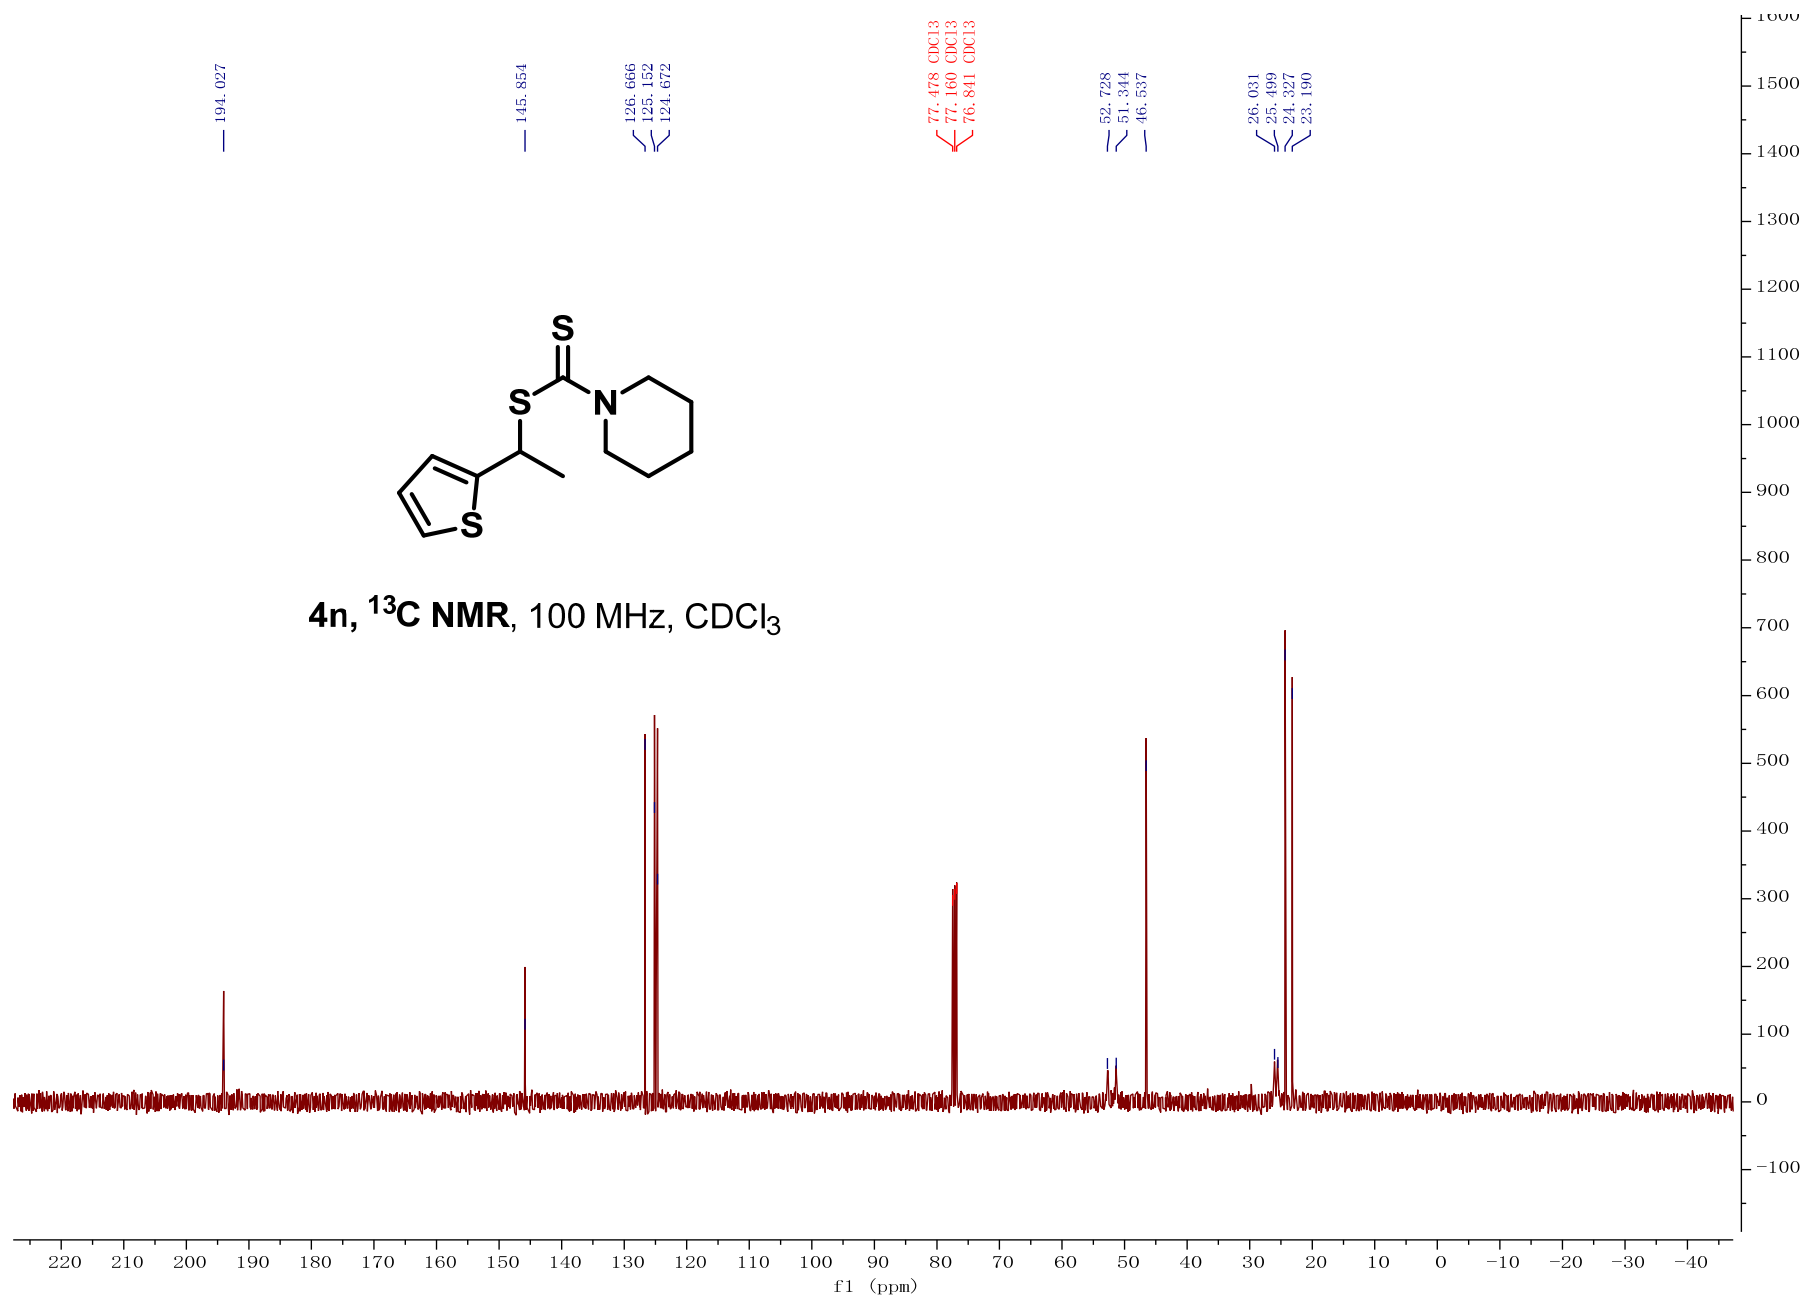

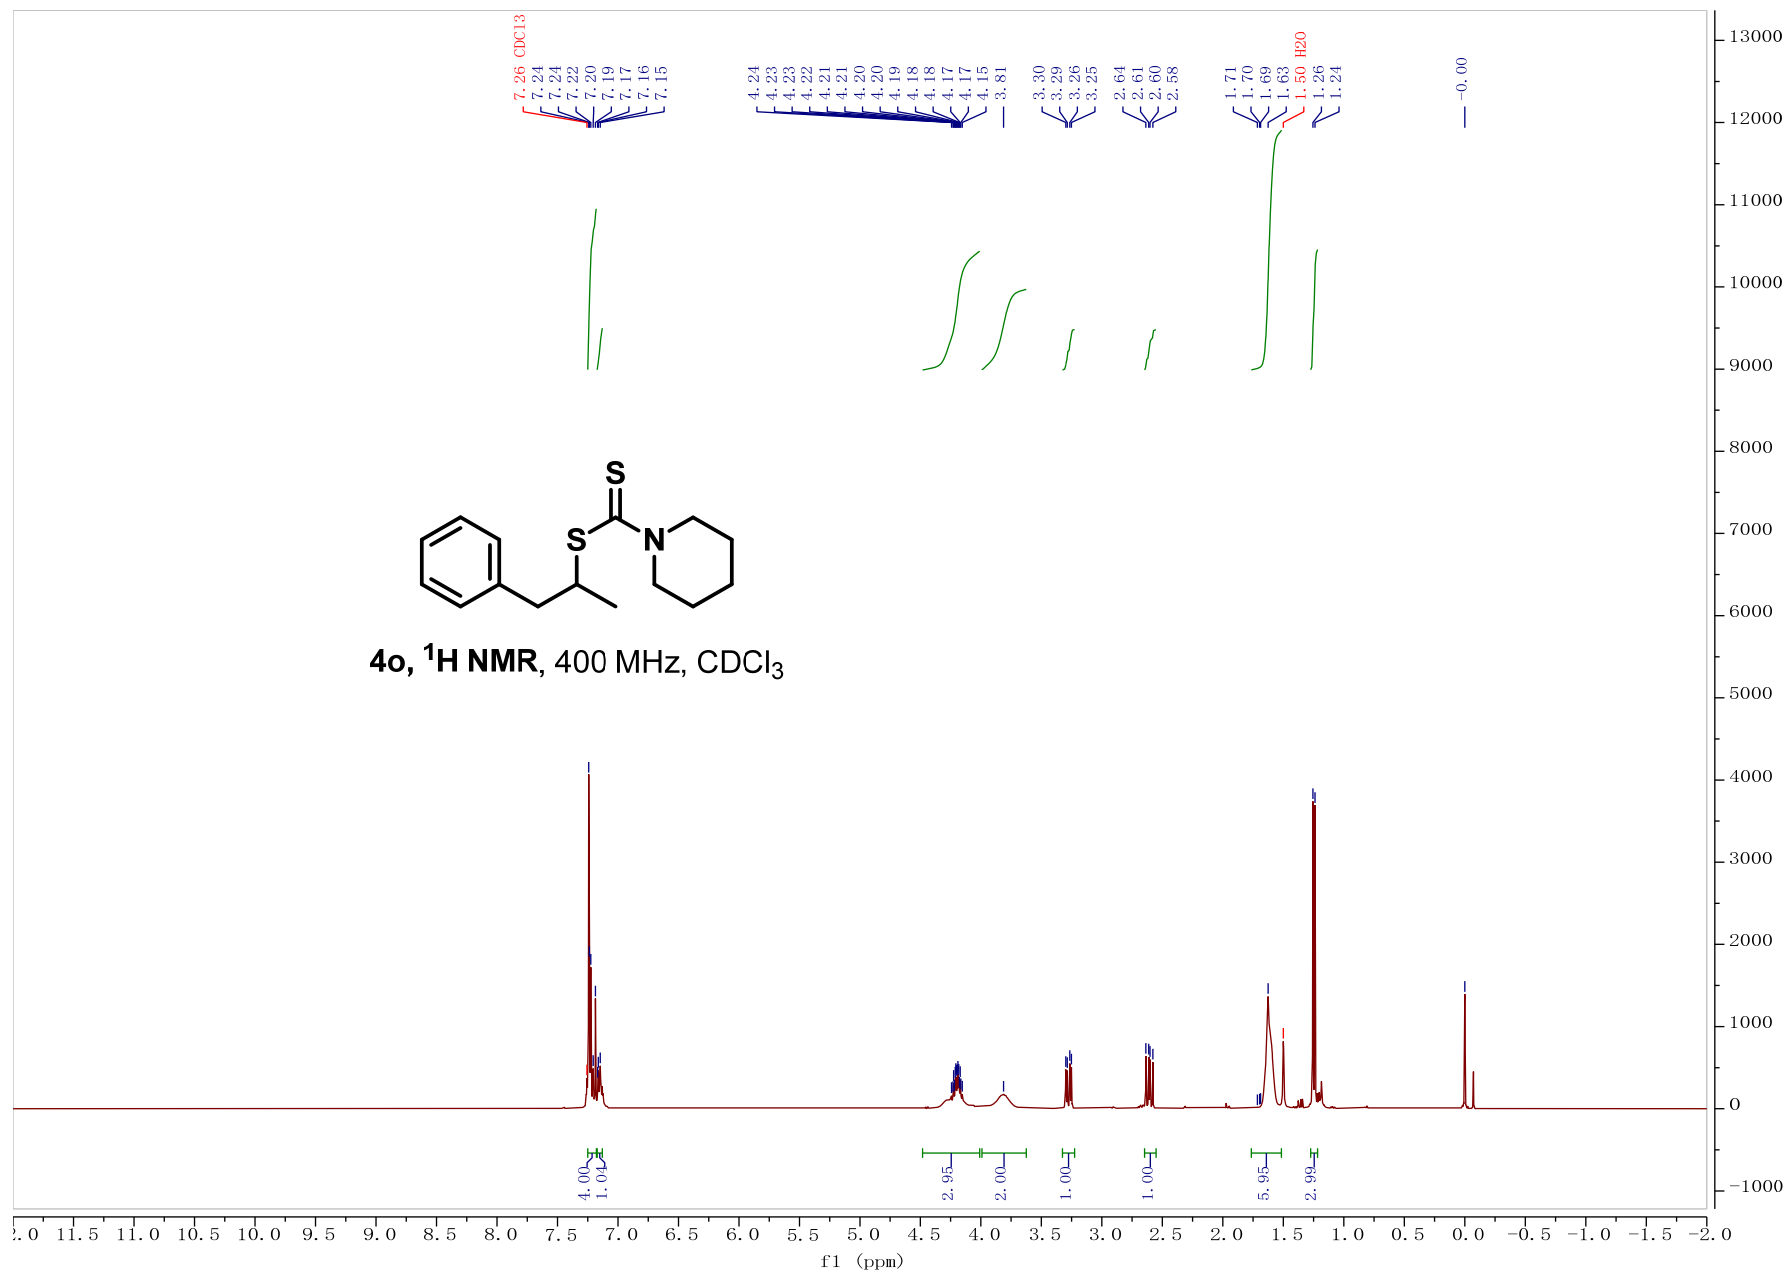

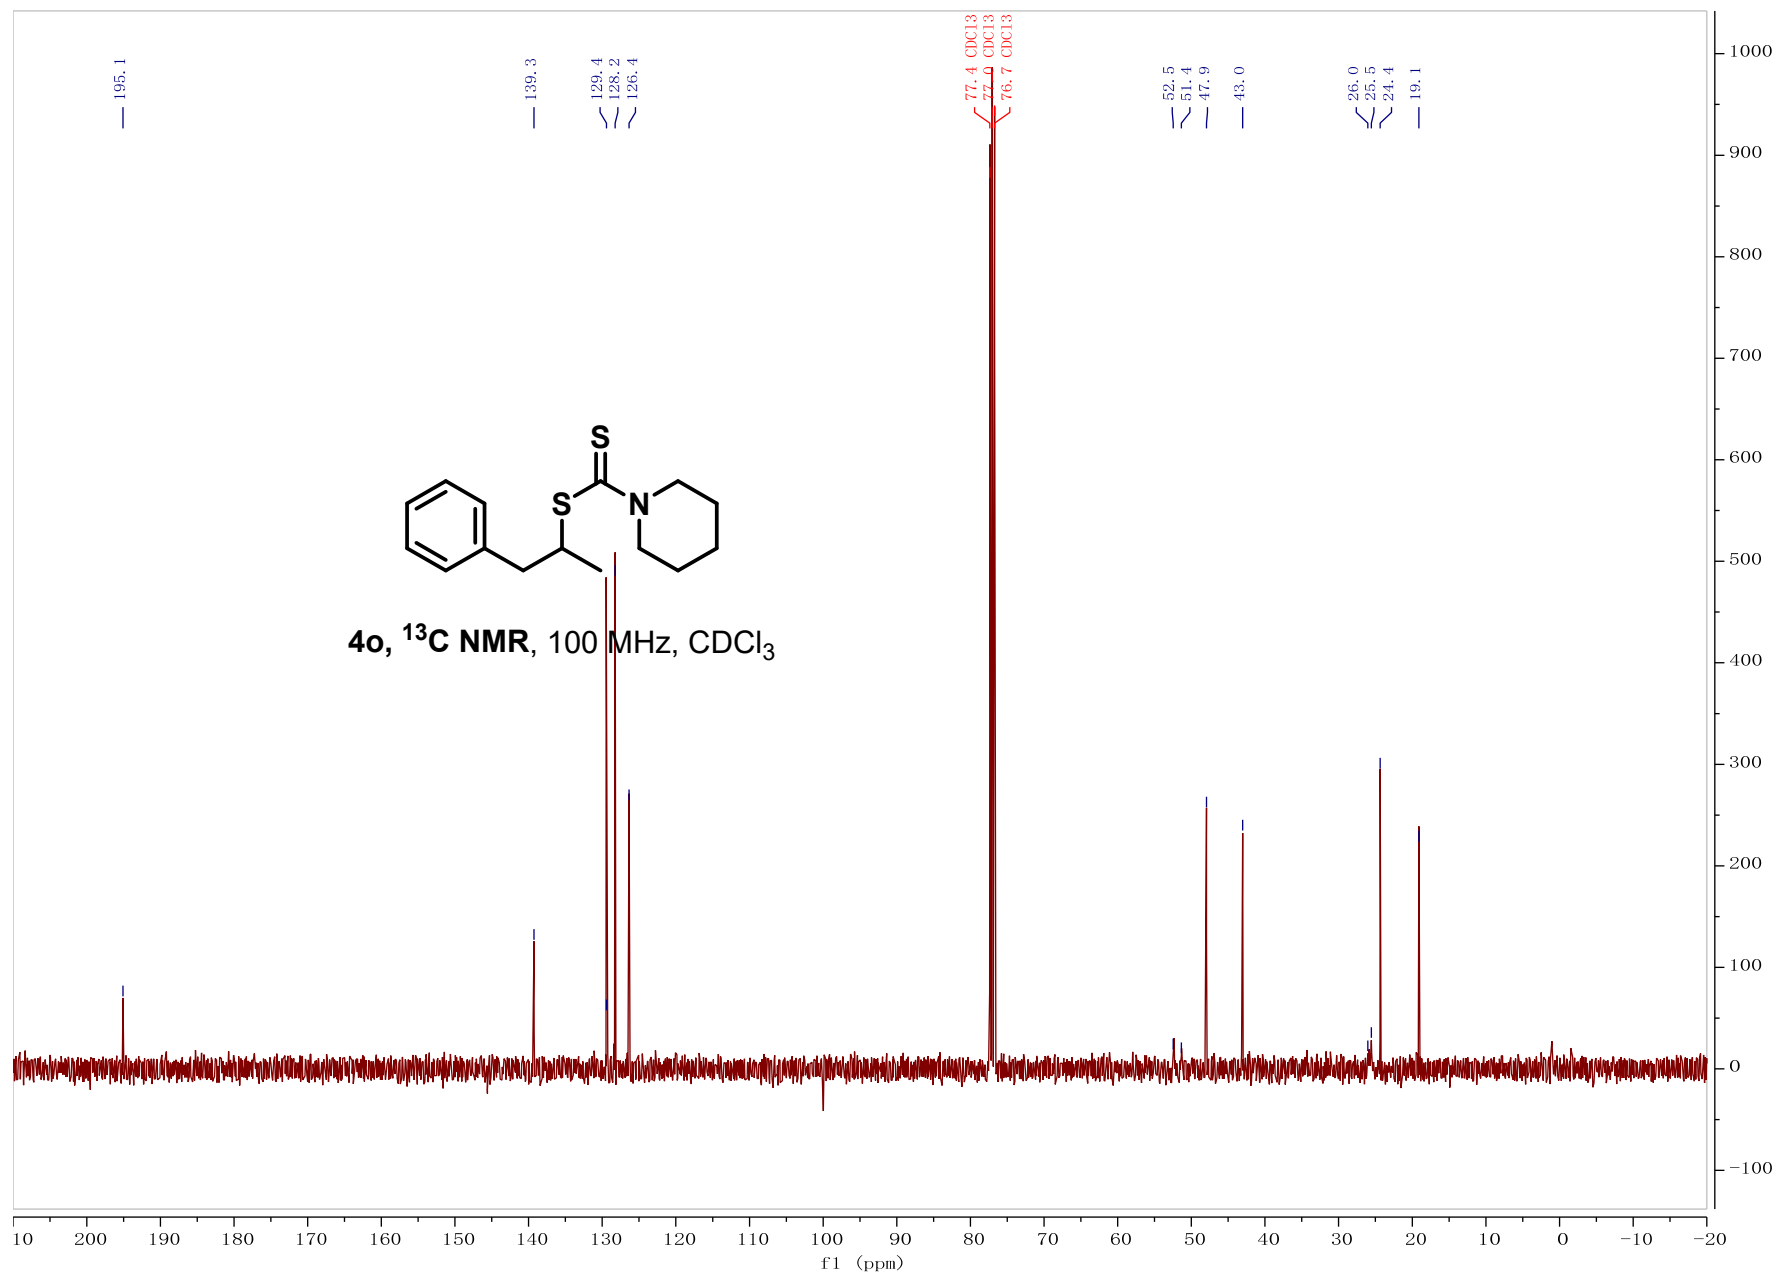

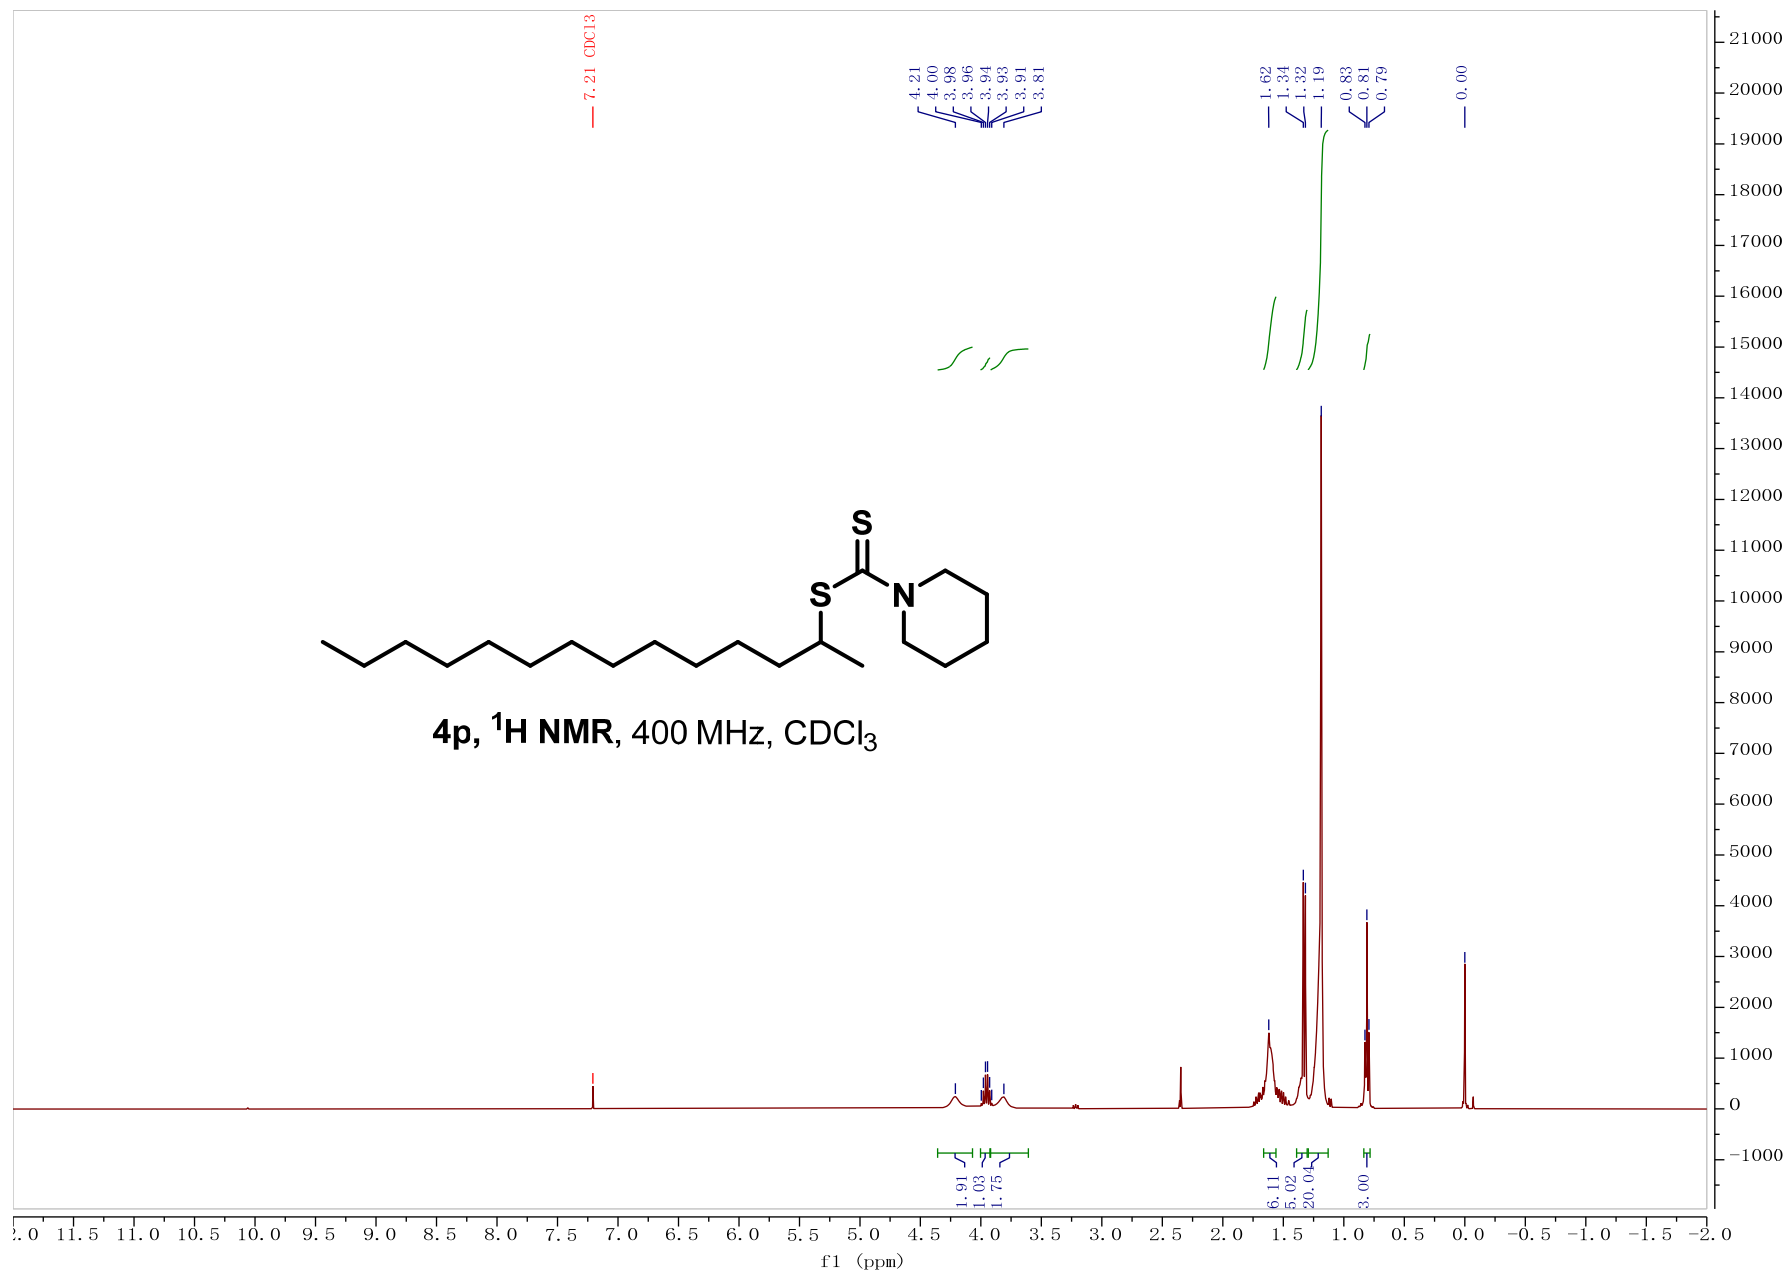

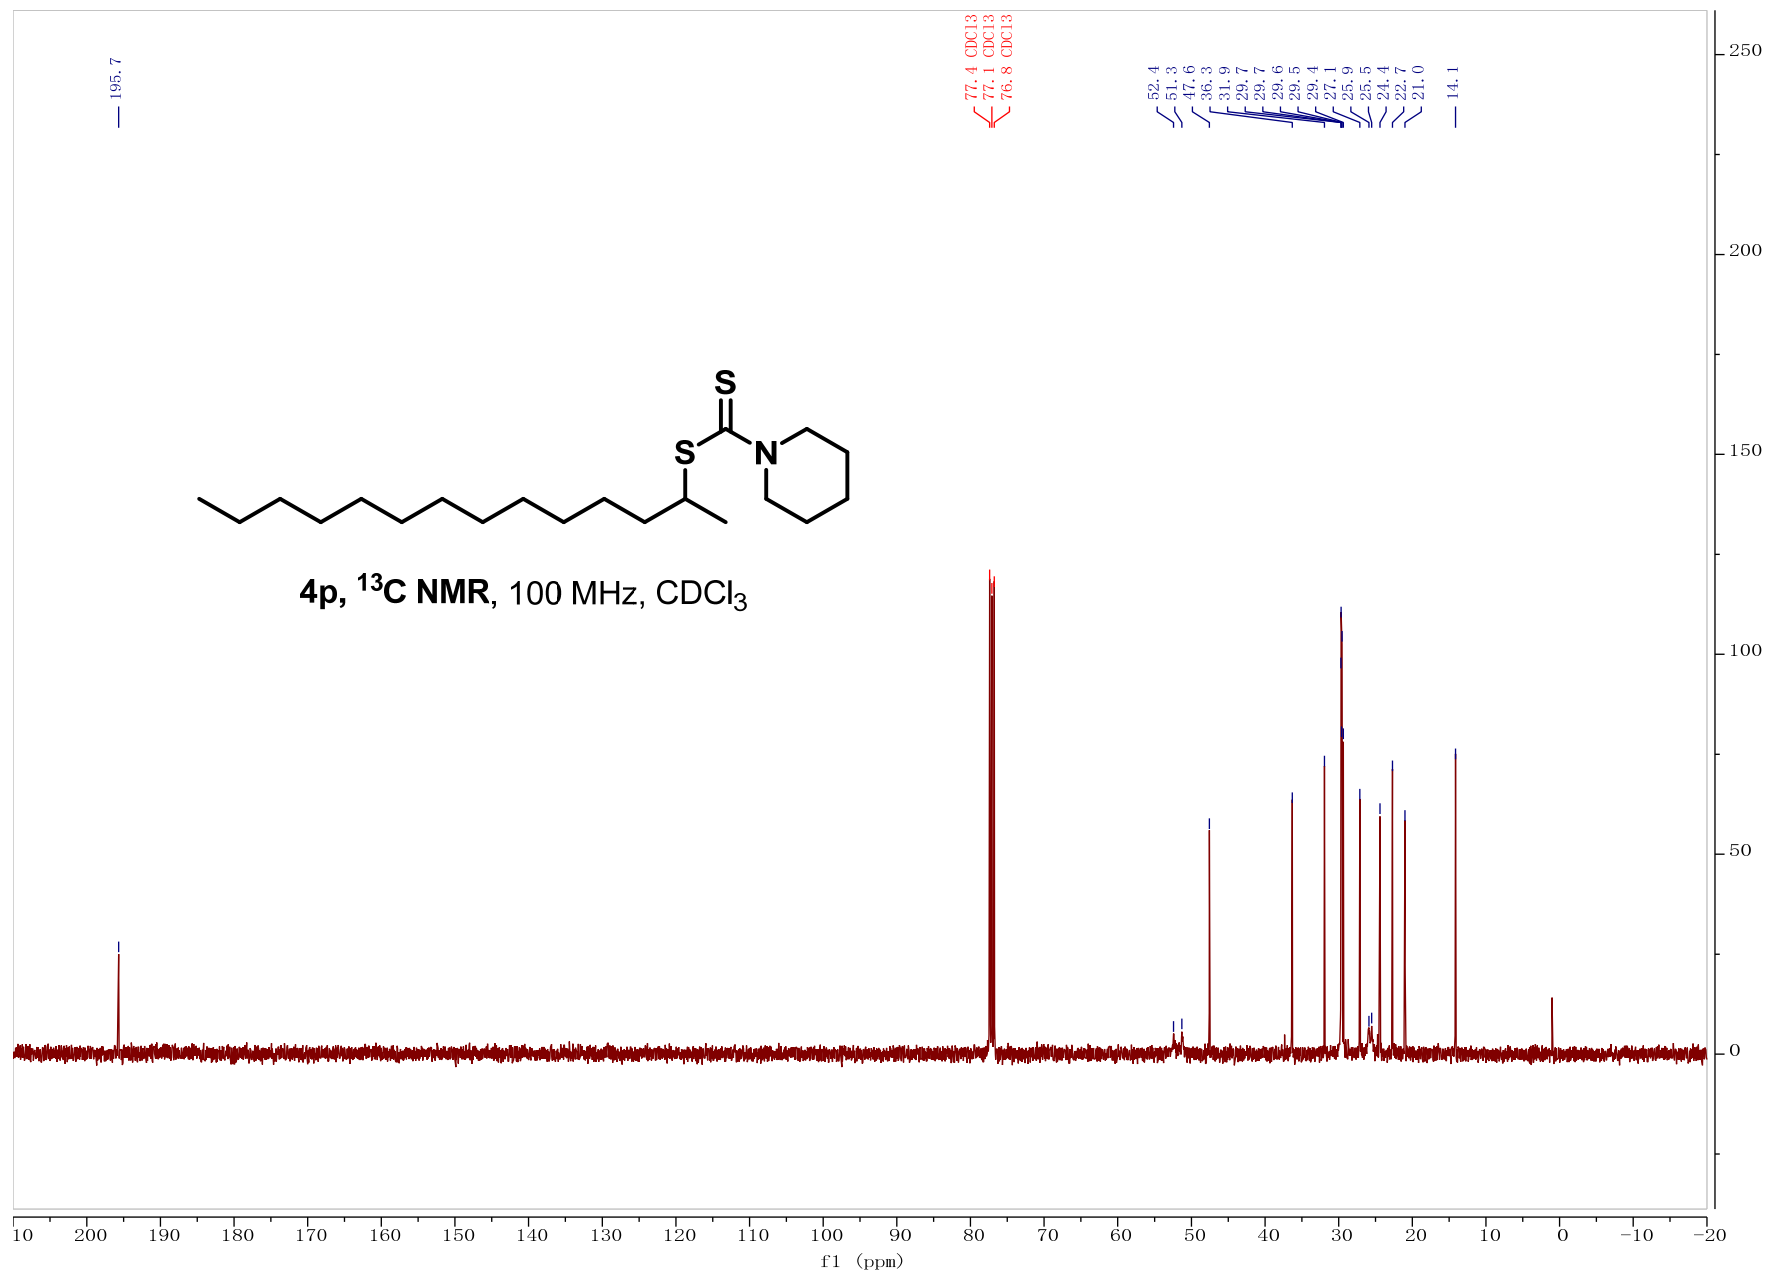

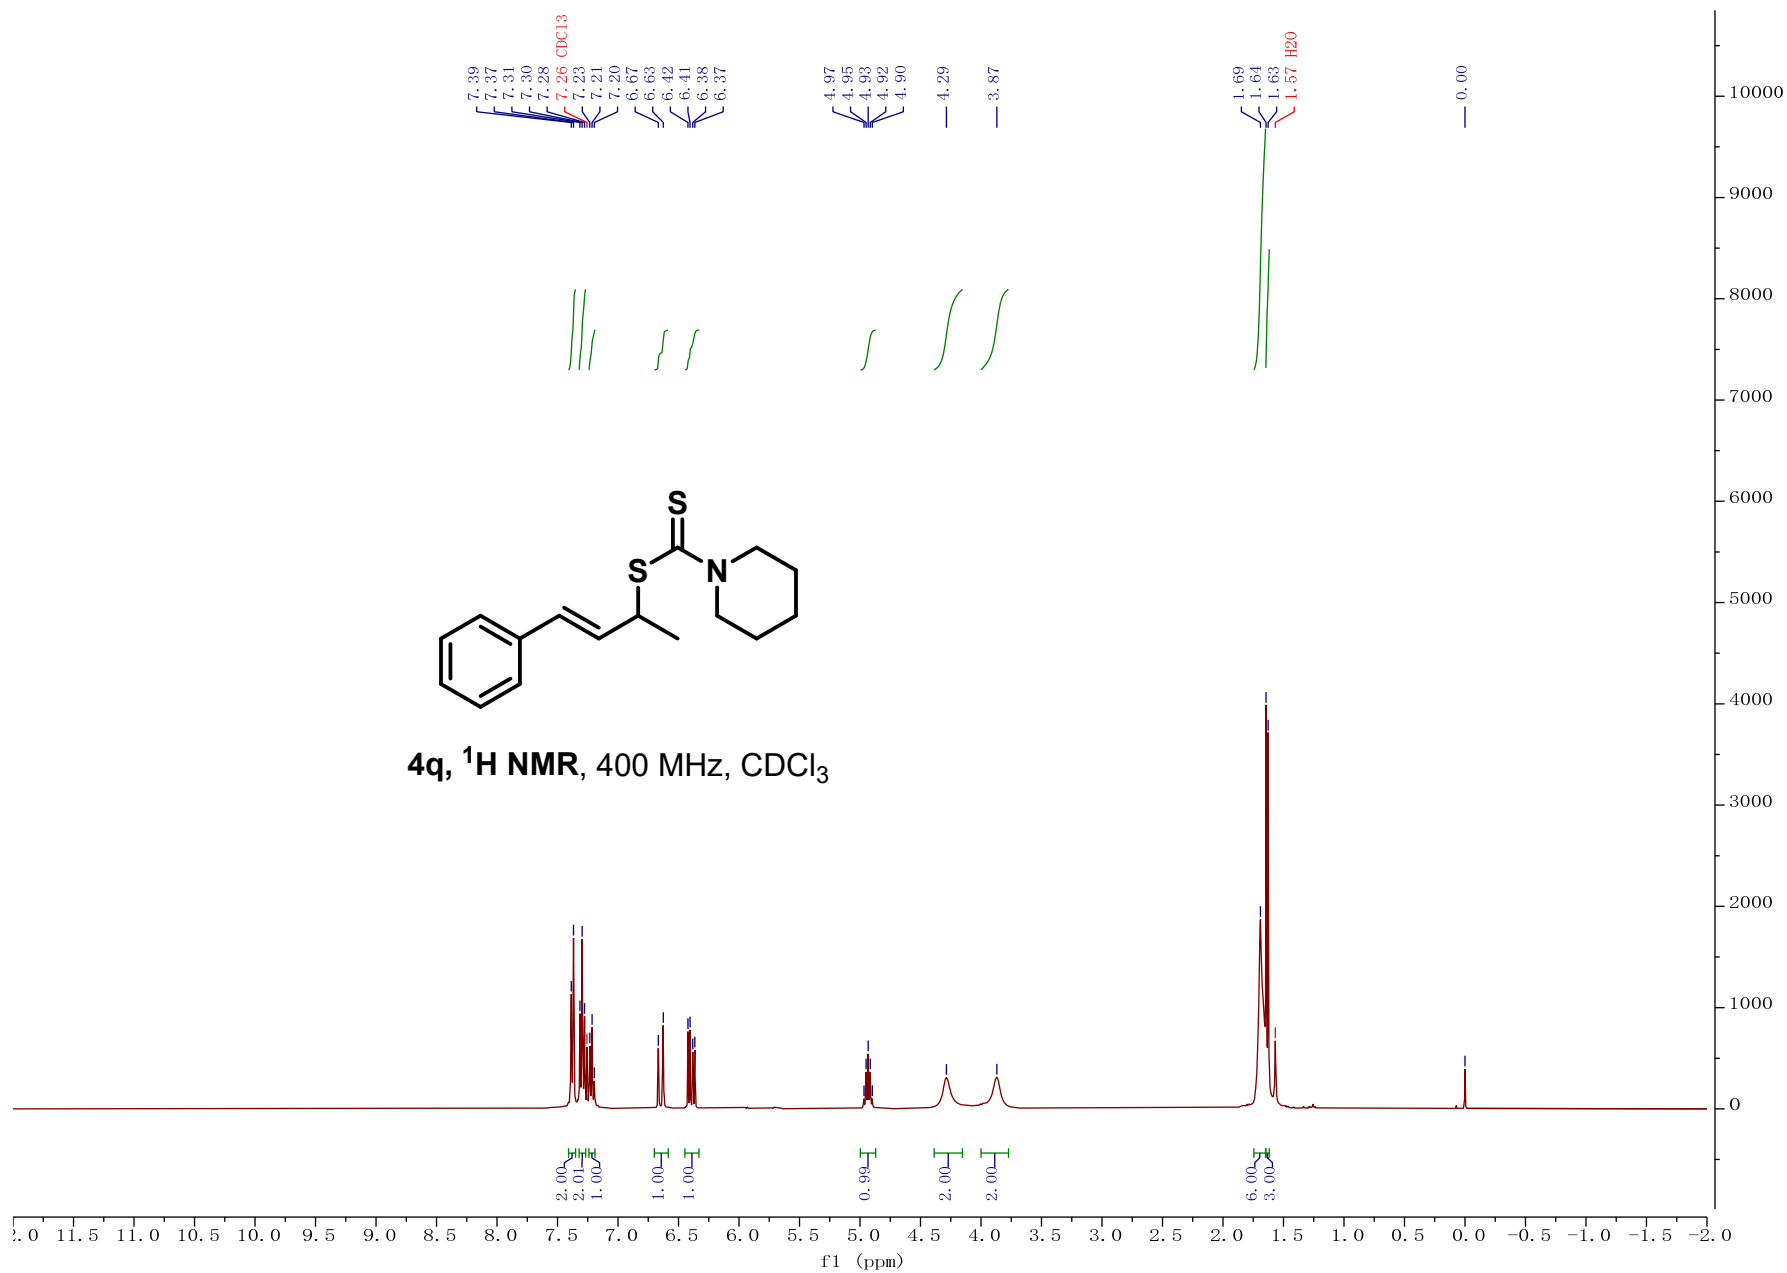

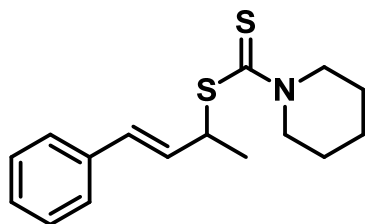

4q,  $^{13}\text{C}$  NMR, 100 MHz,  $\text{CDCl}_3$

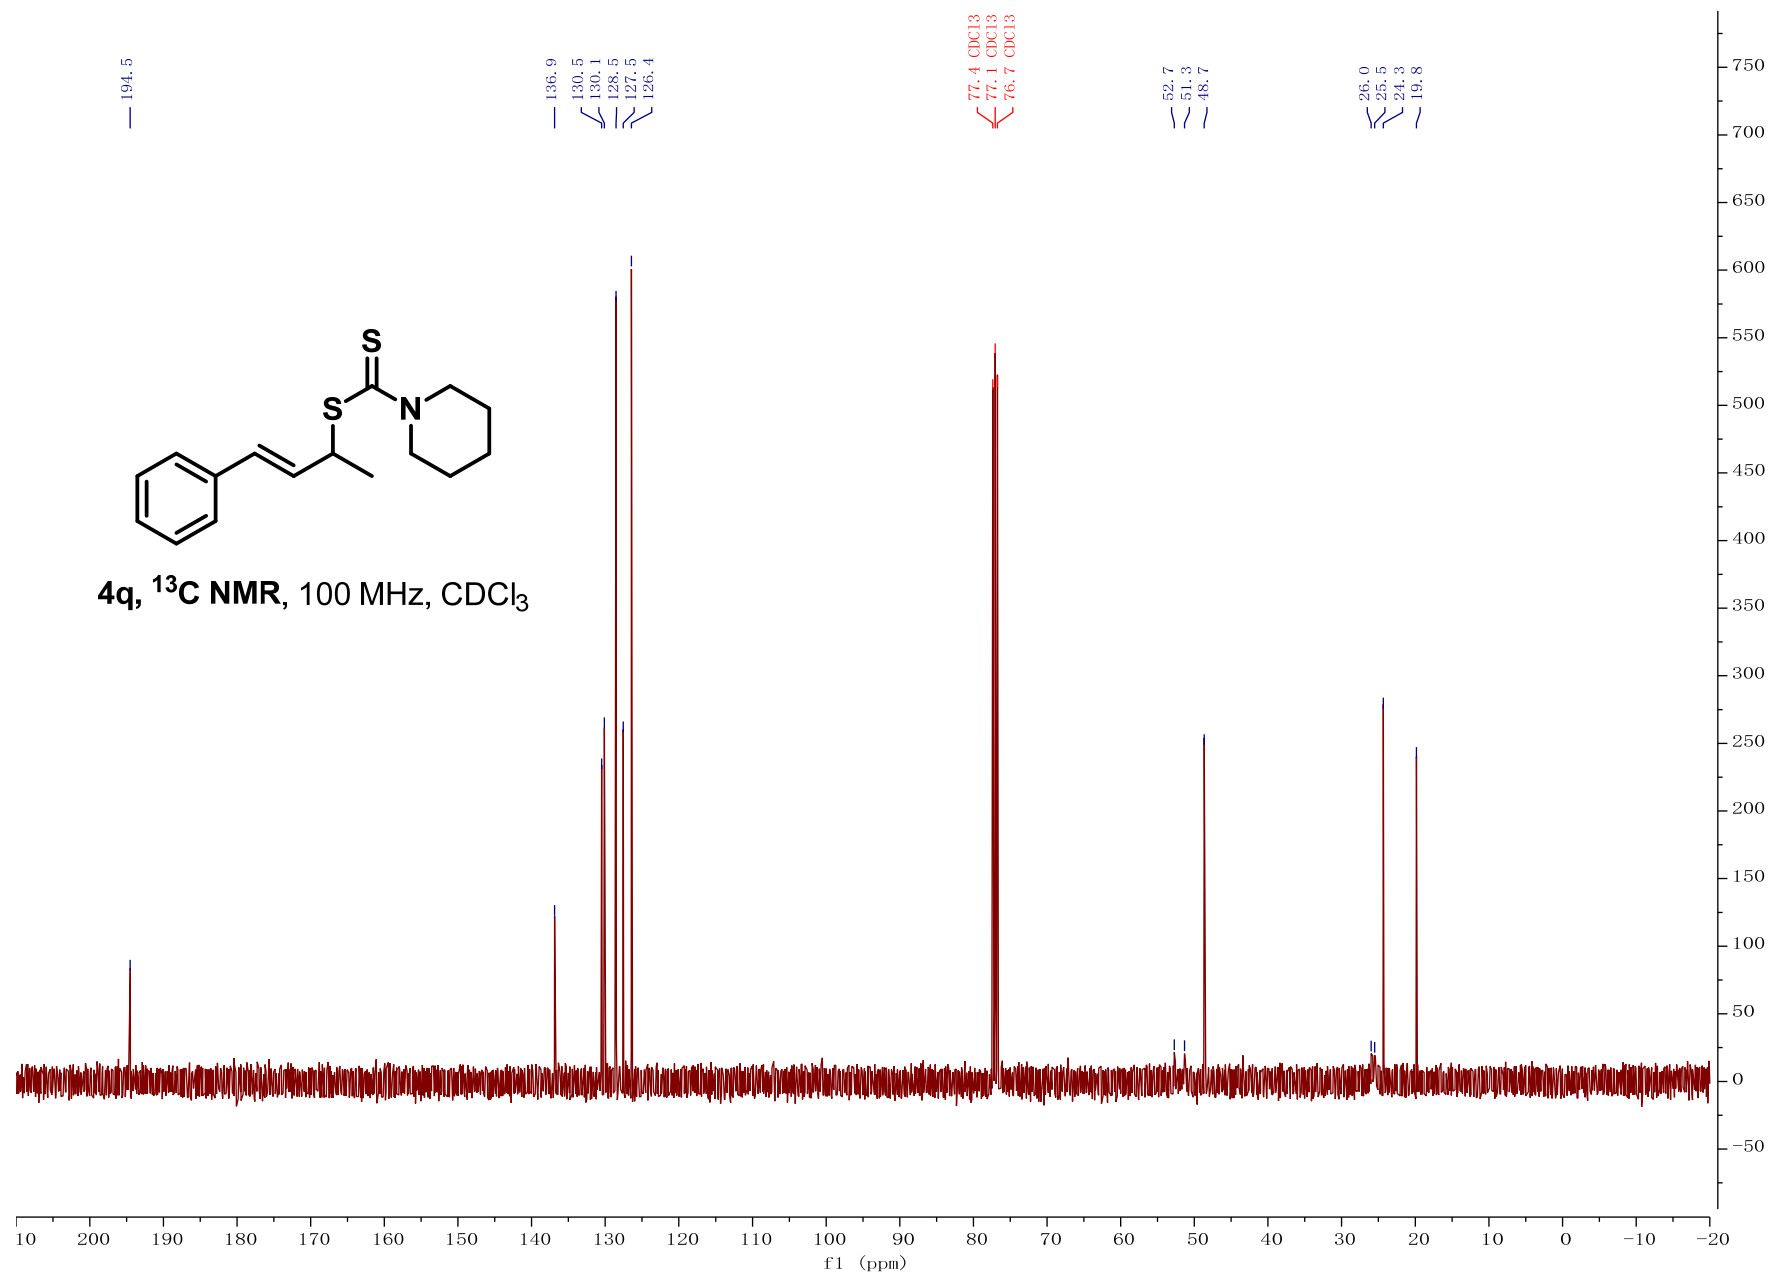

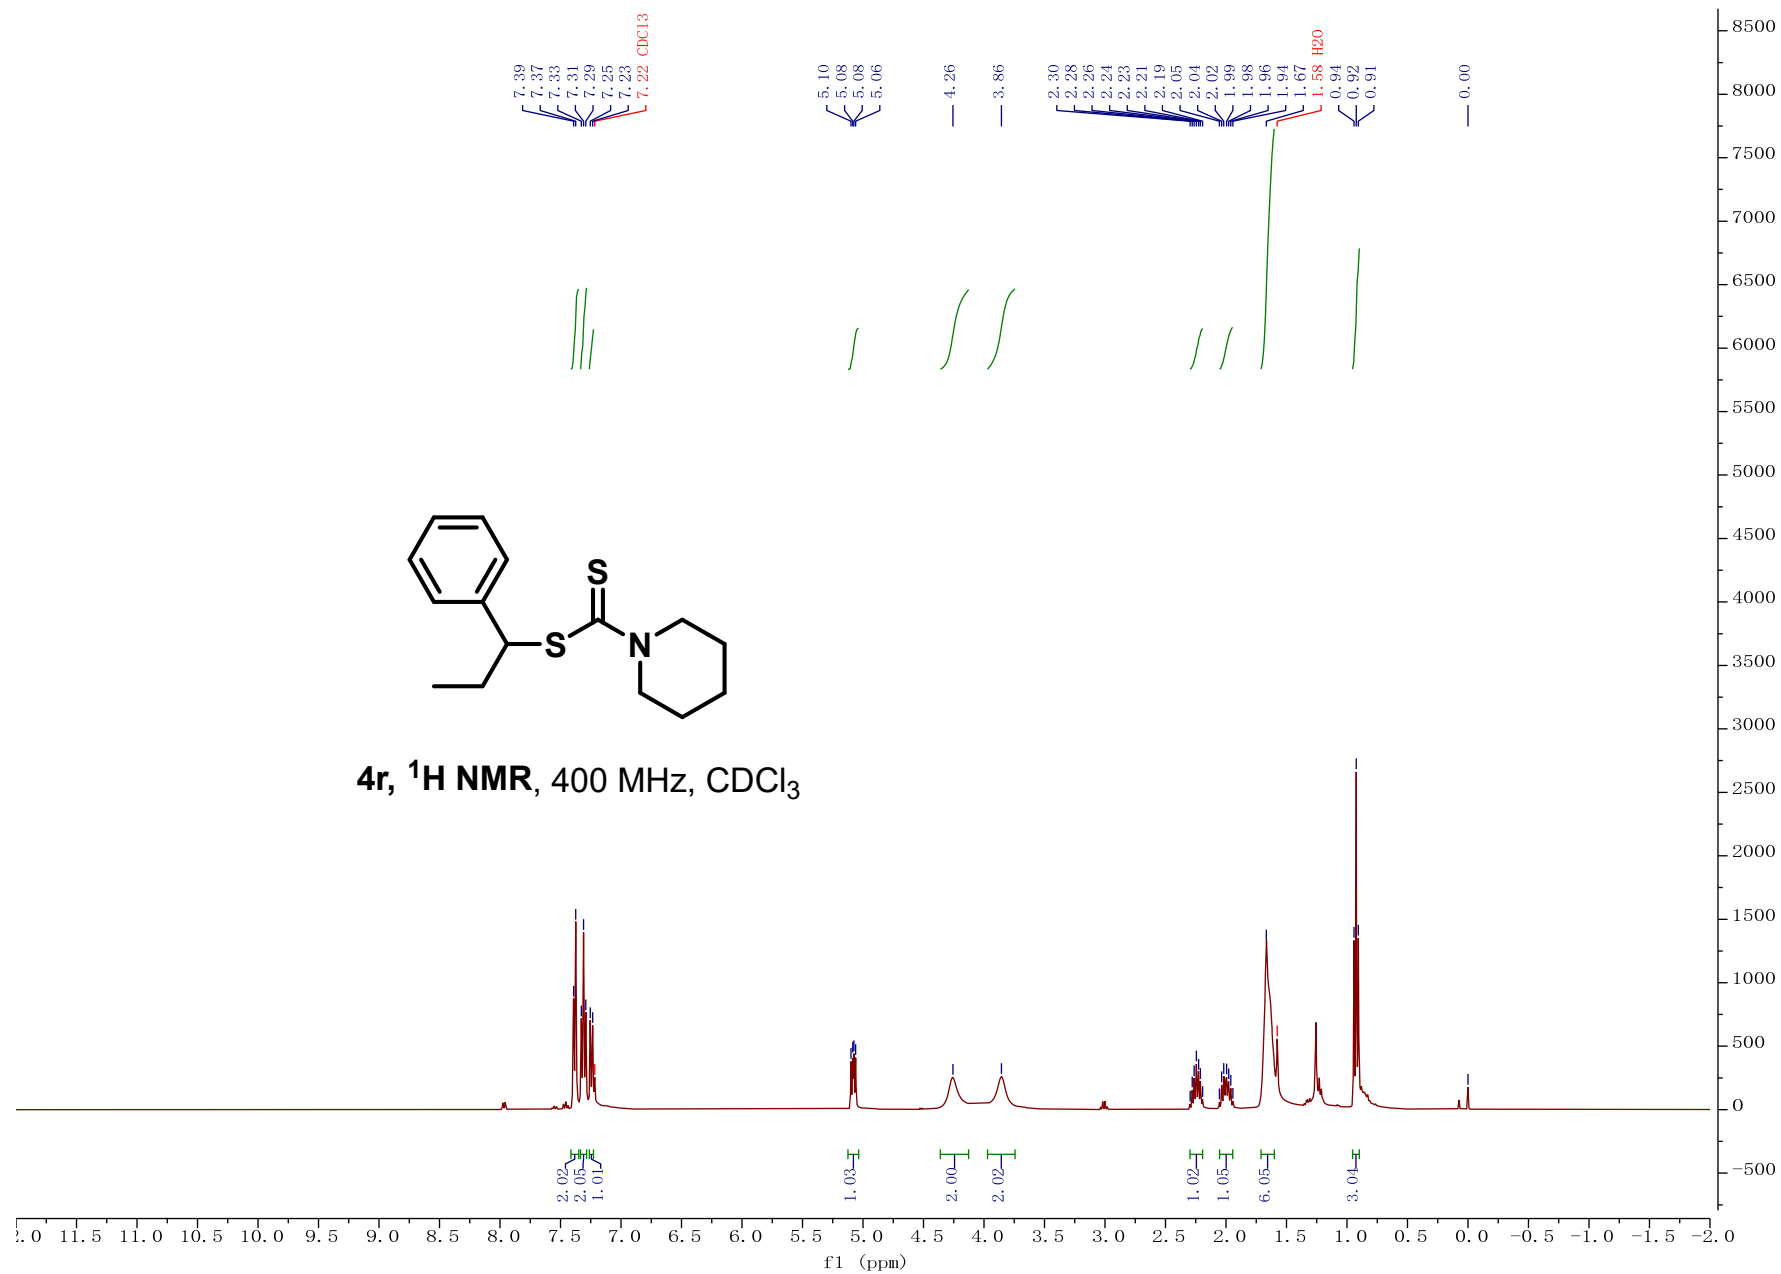

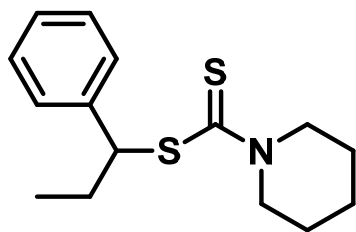

**4r,  $^{13}\text{C}$  NMR, 100 MHz,  $\text{CDCl}_3$**

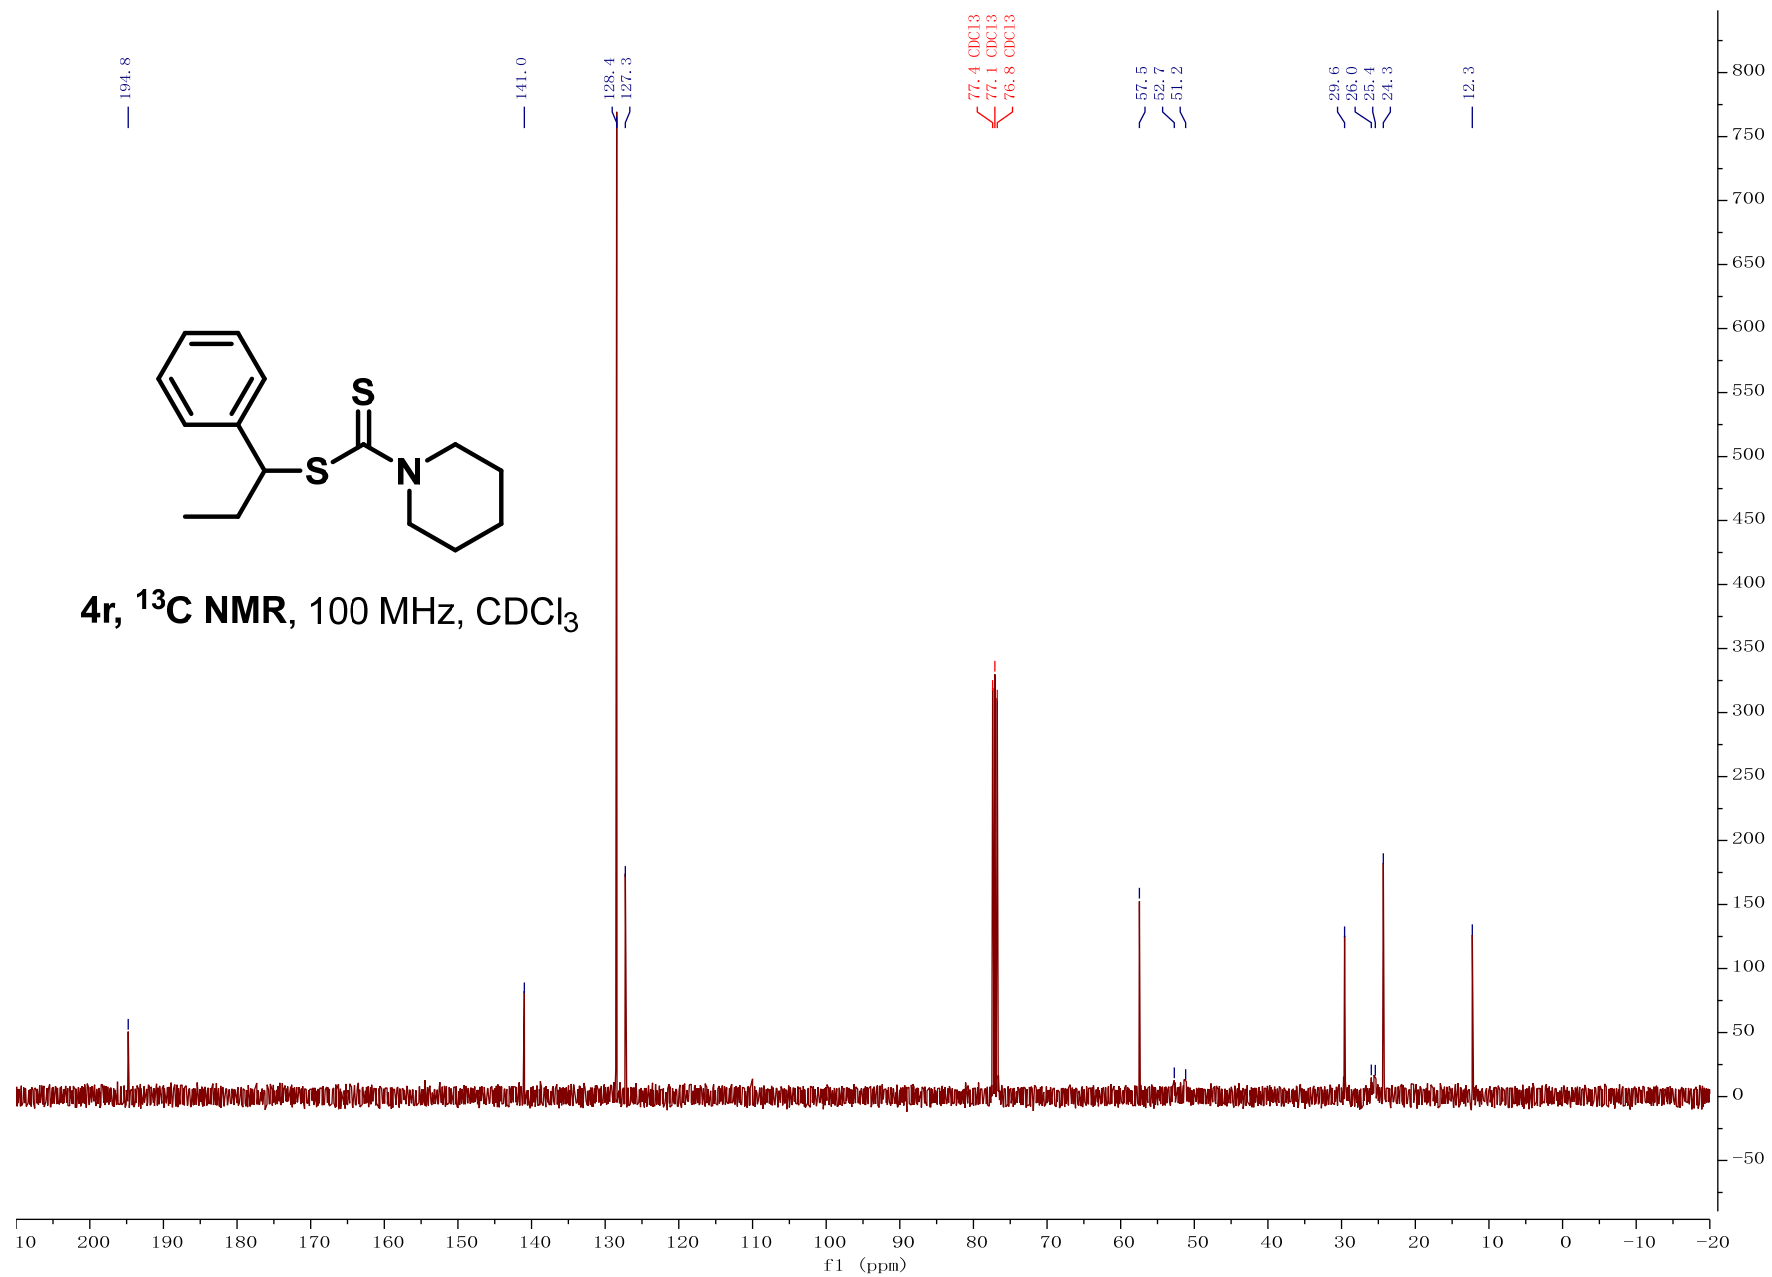

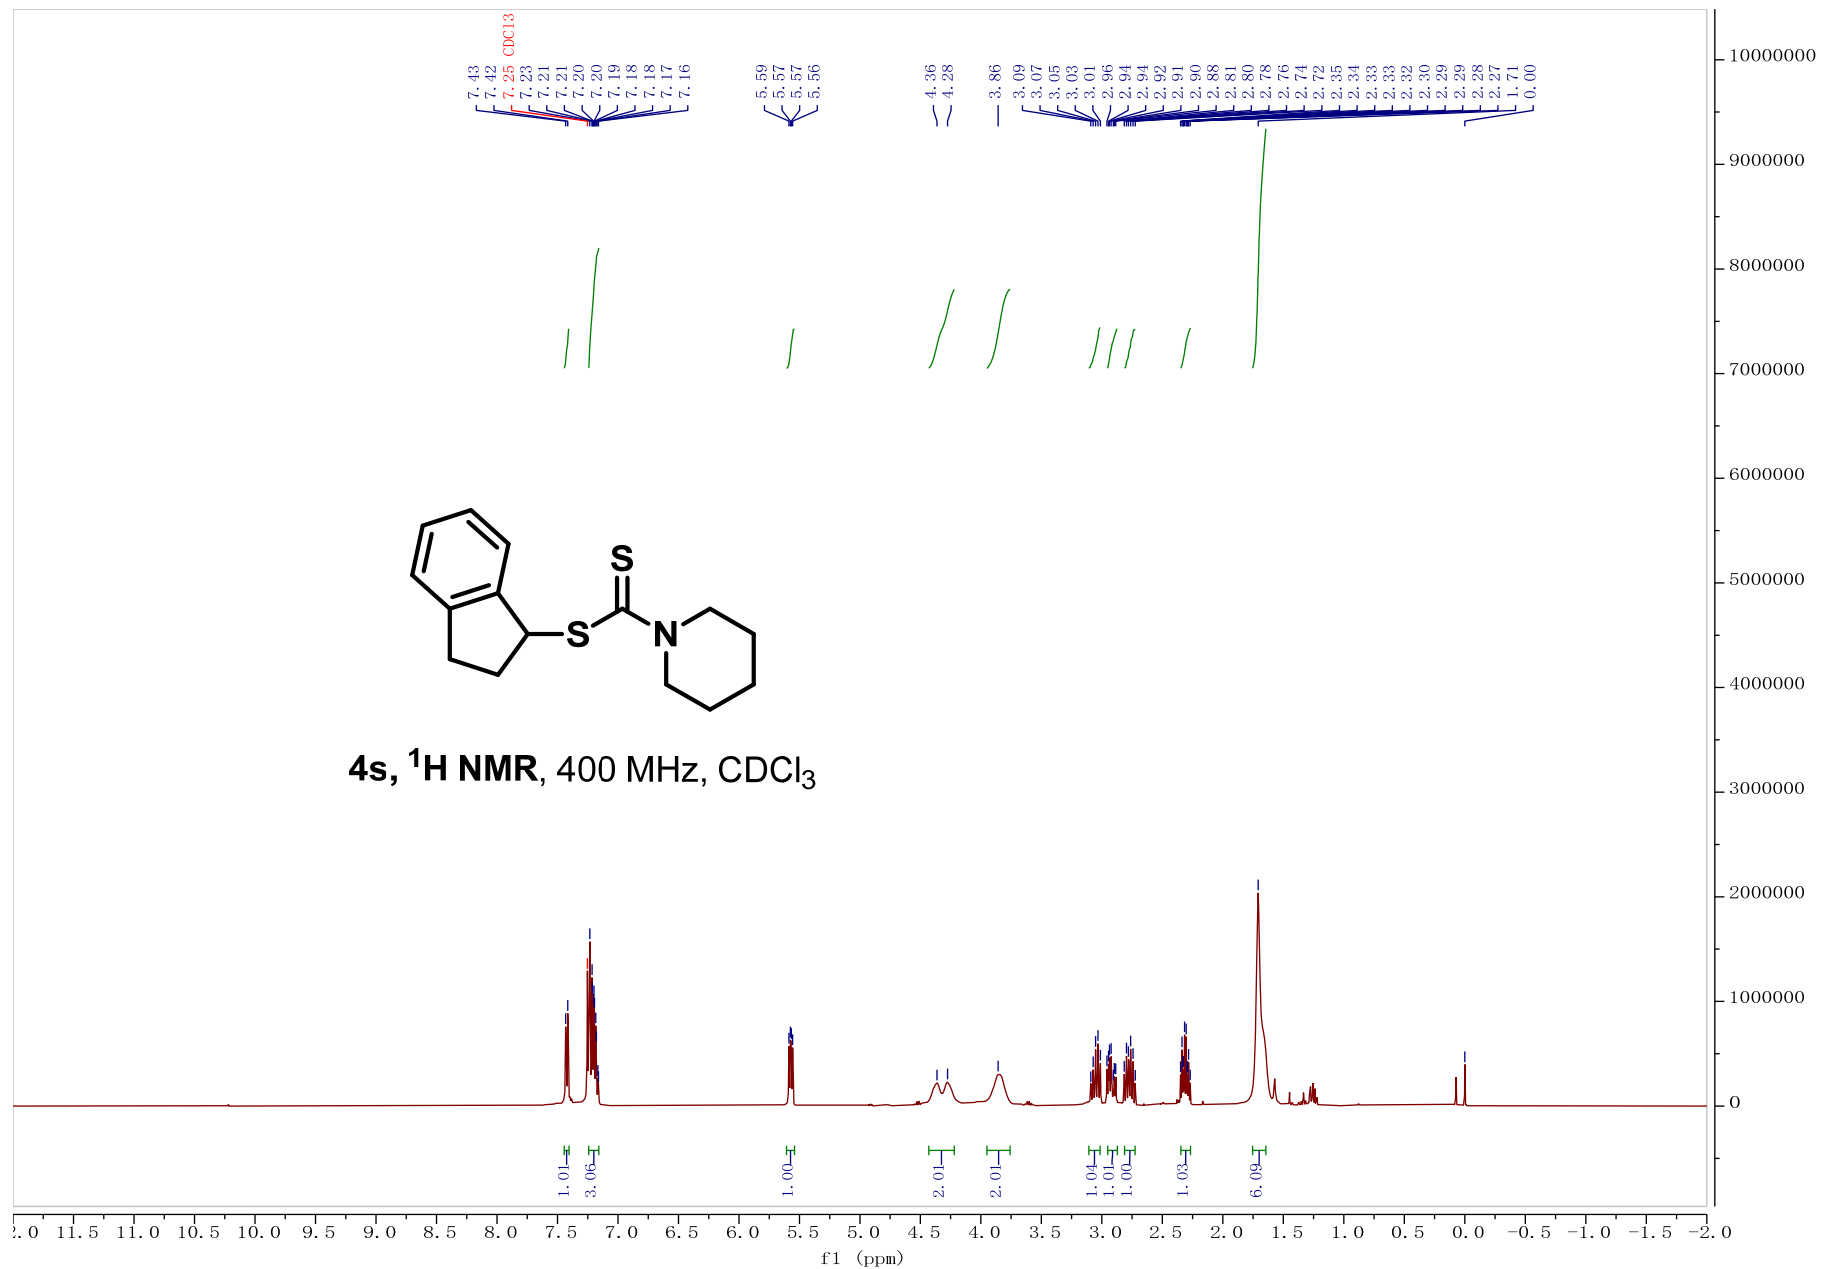

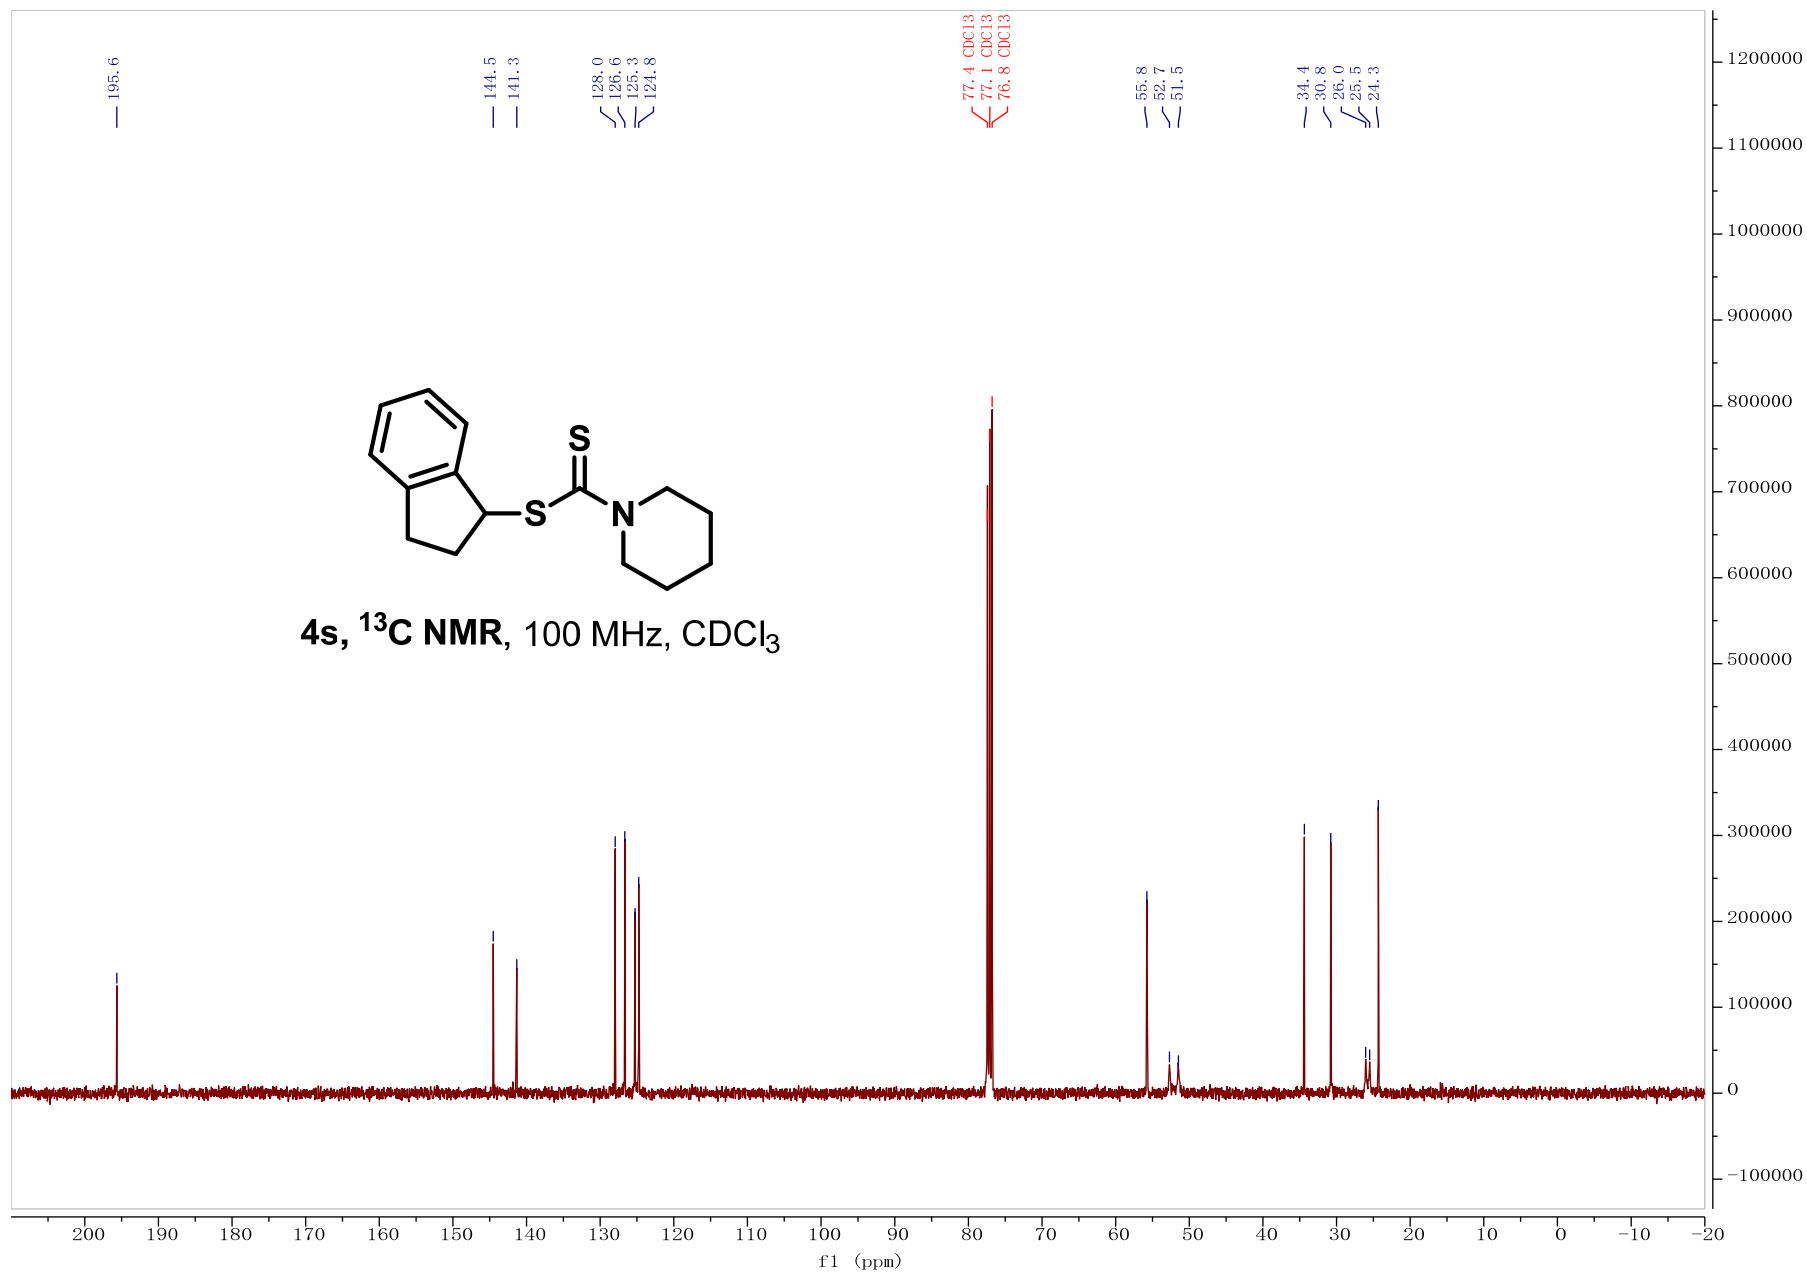

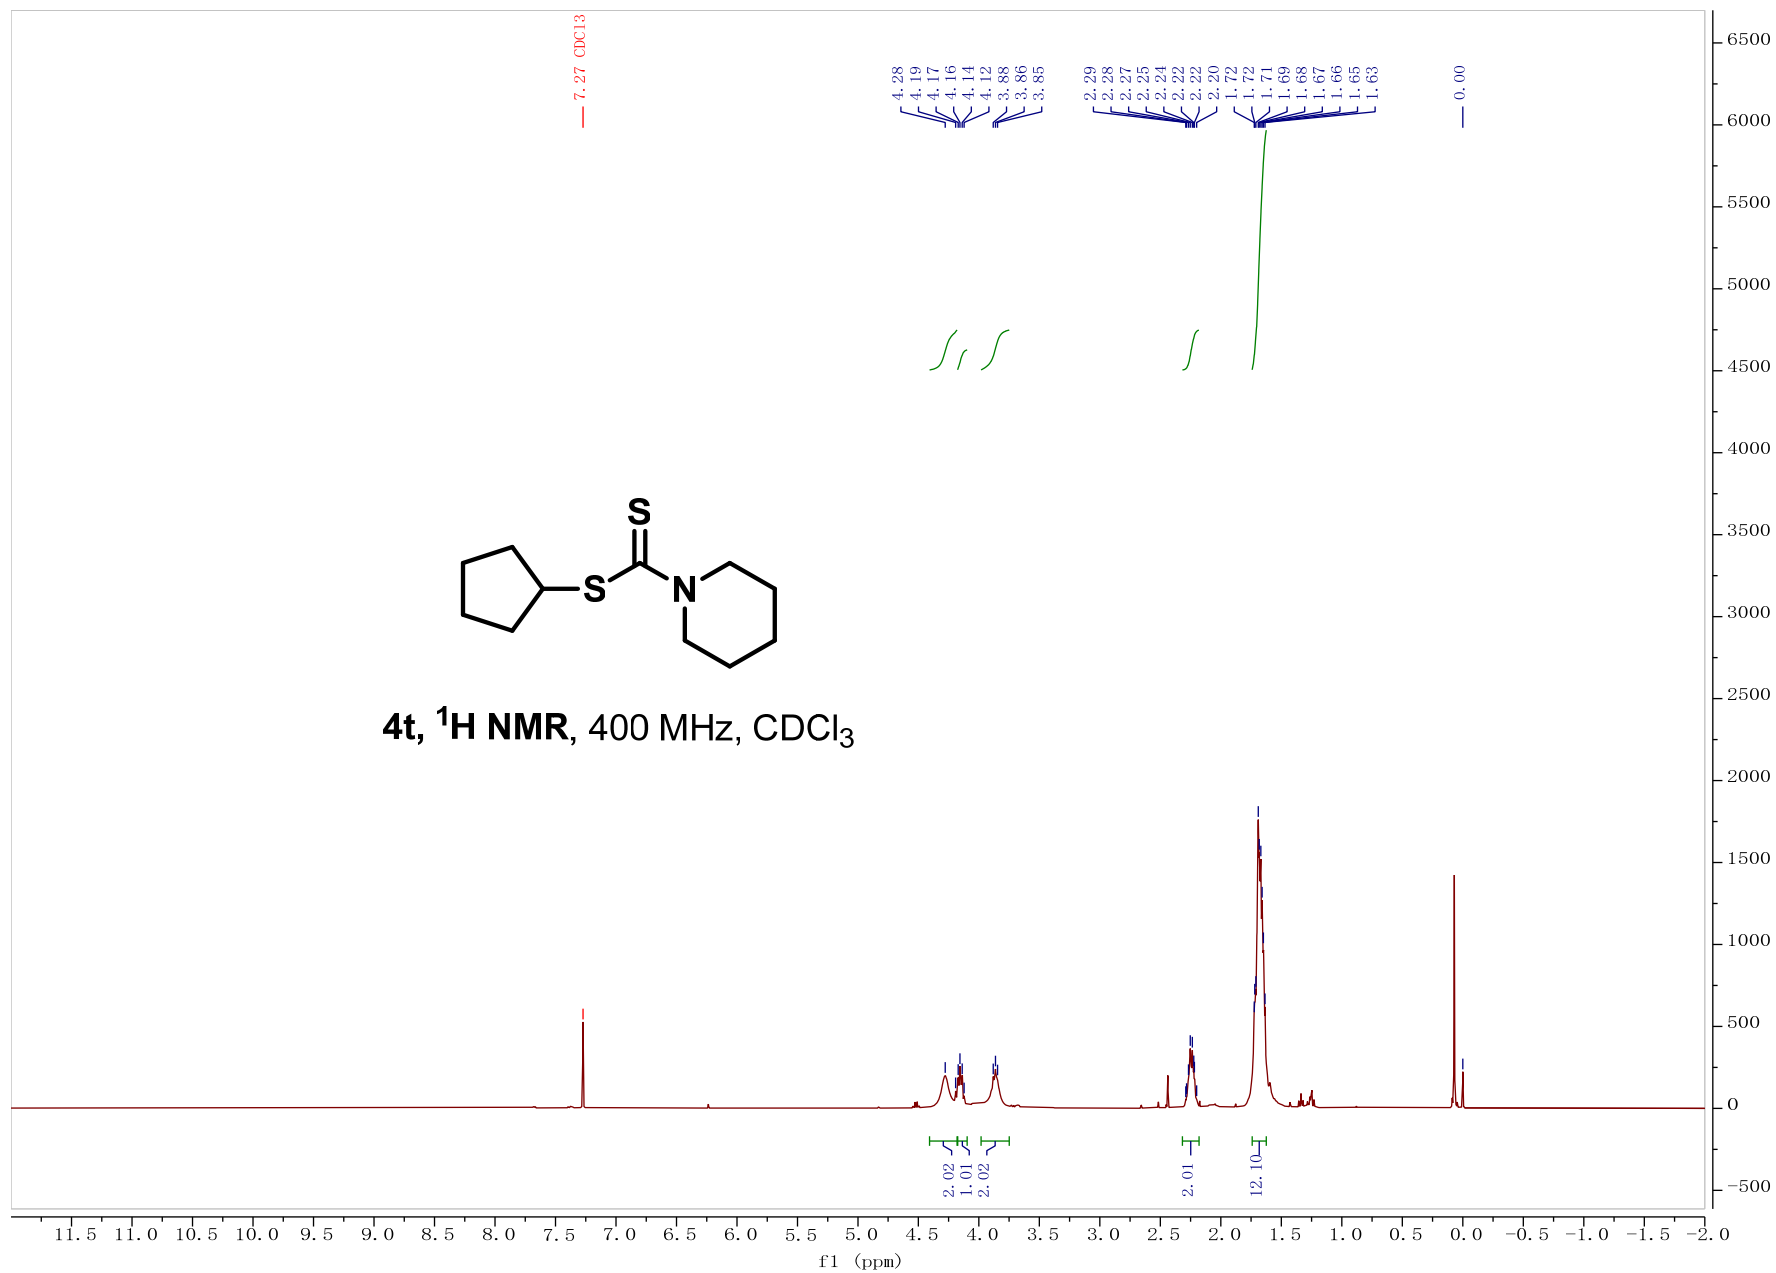

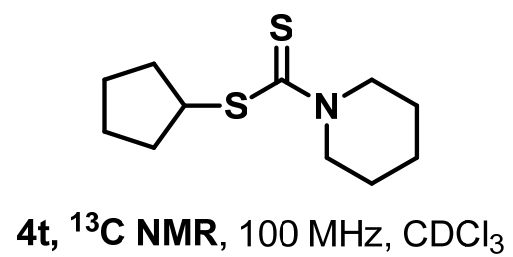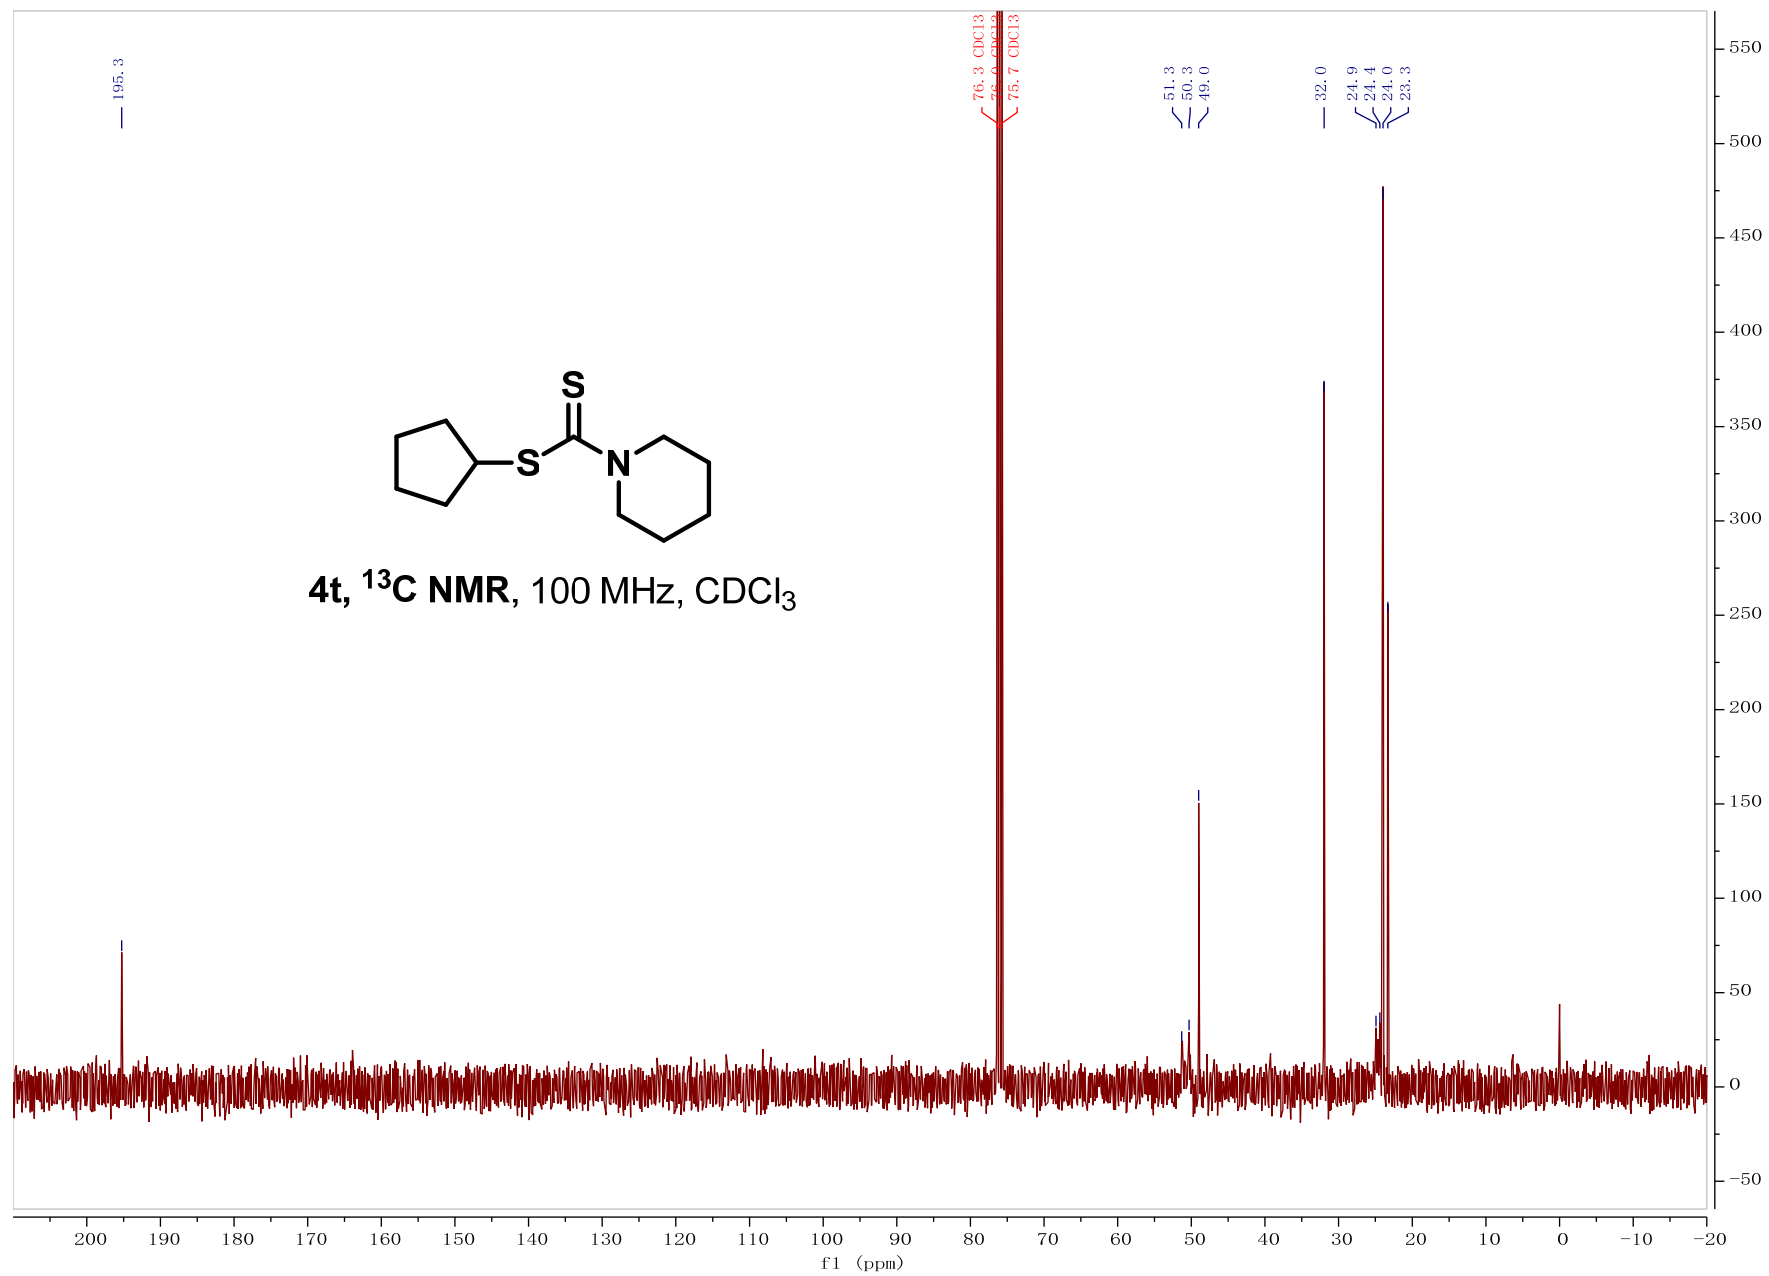

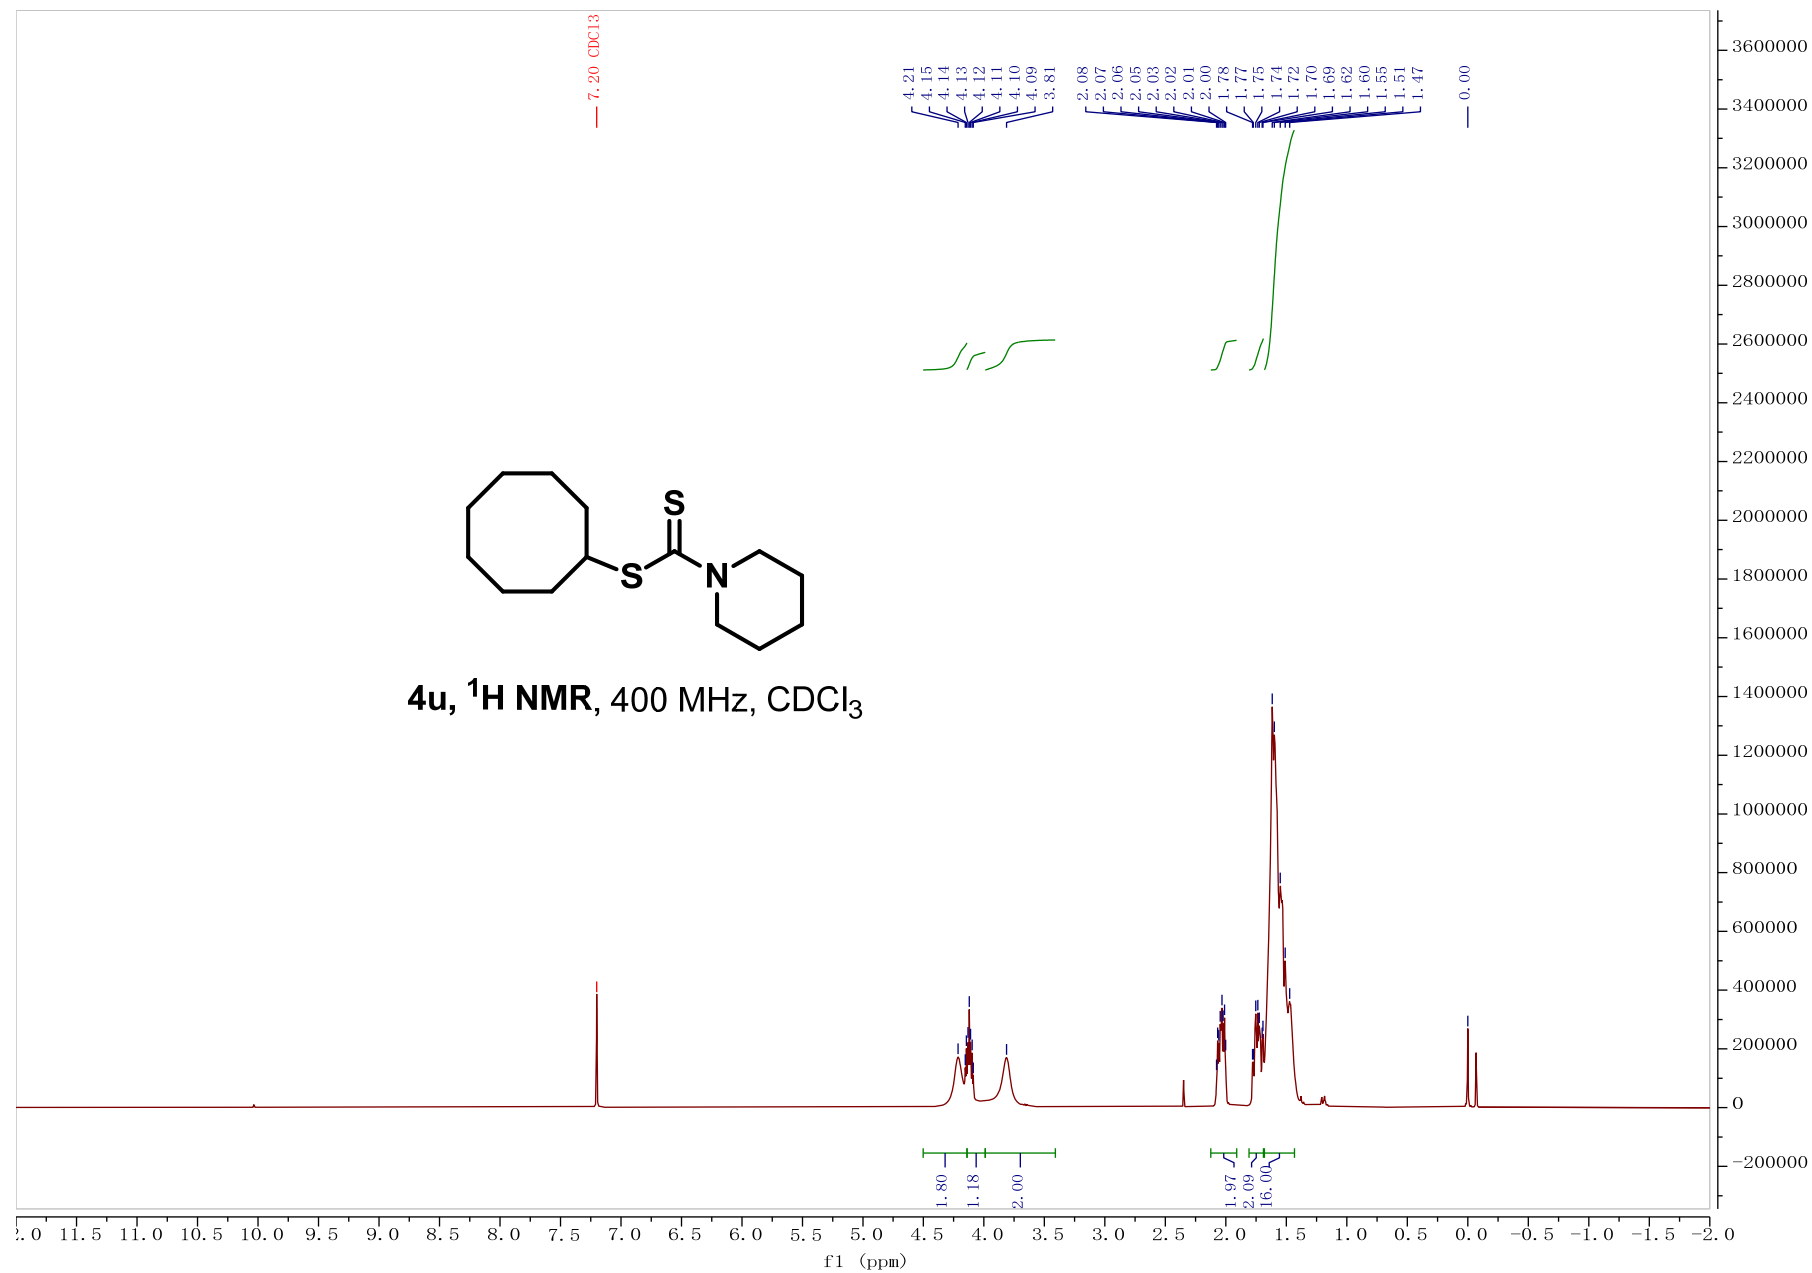

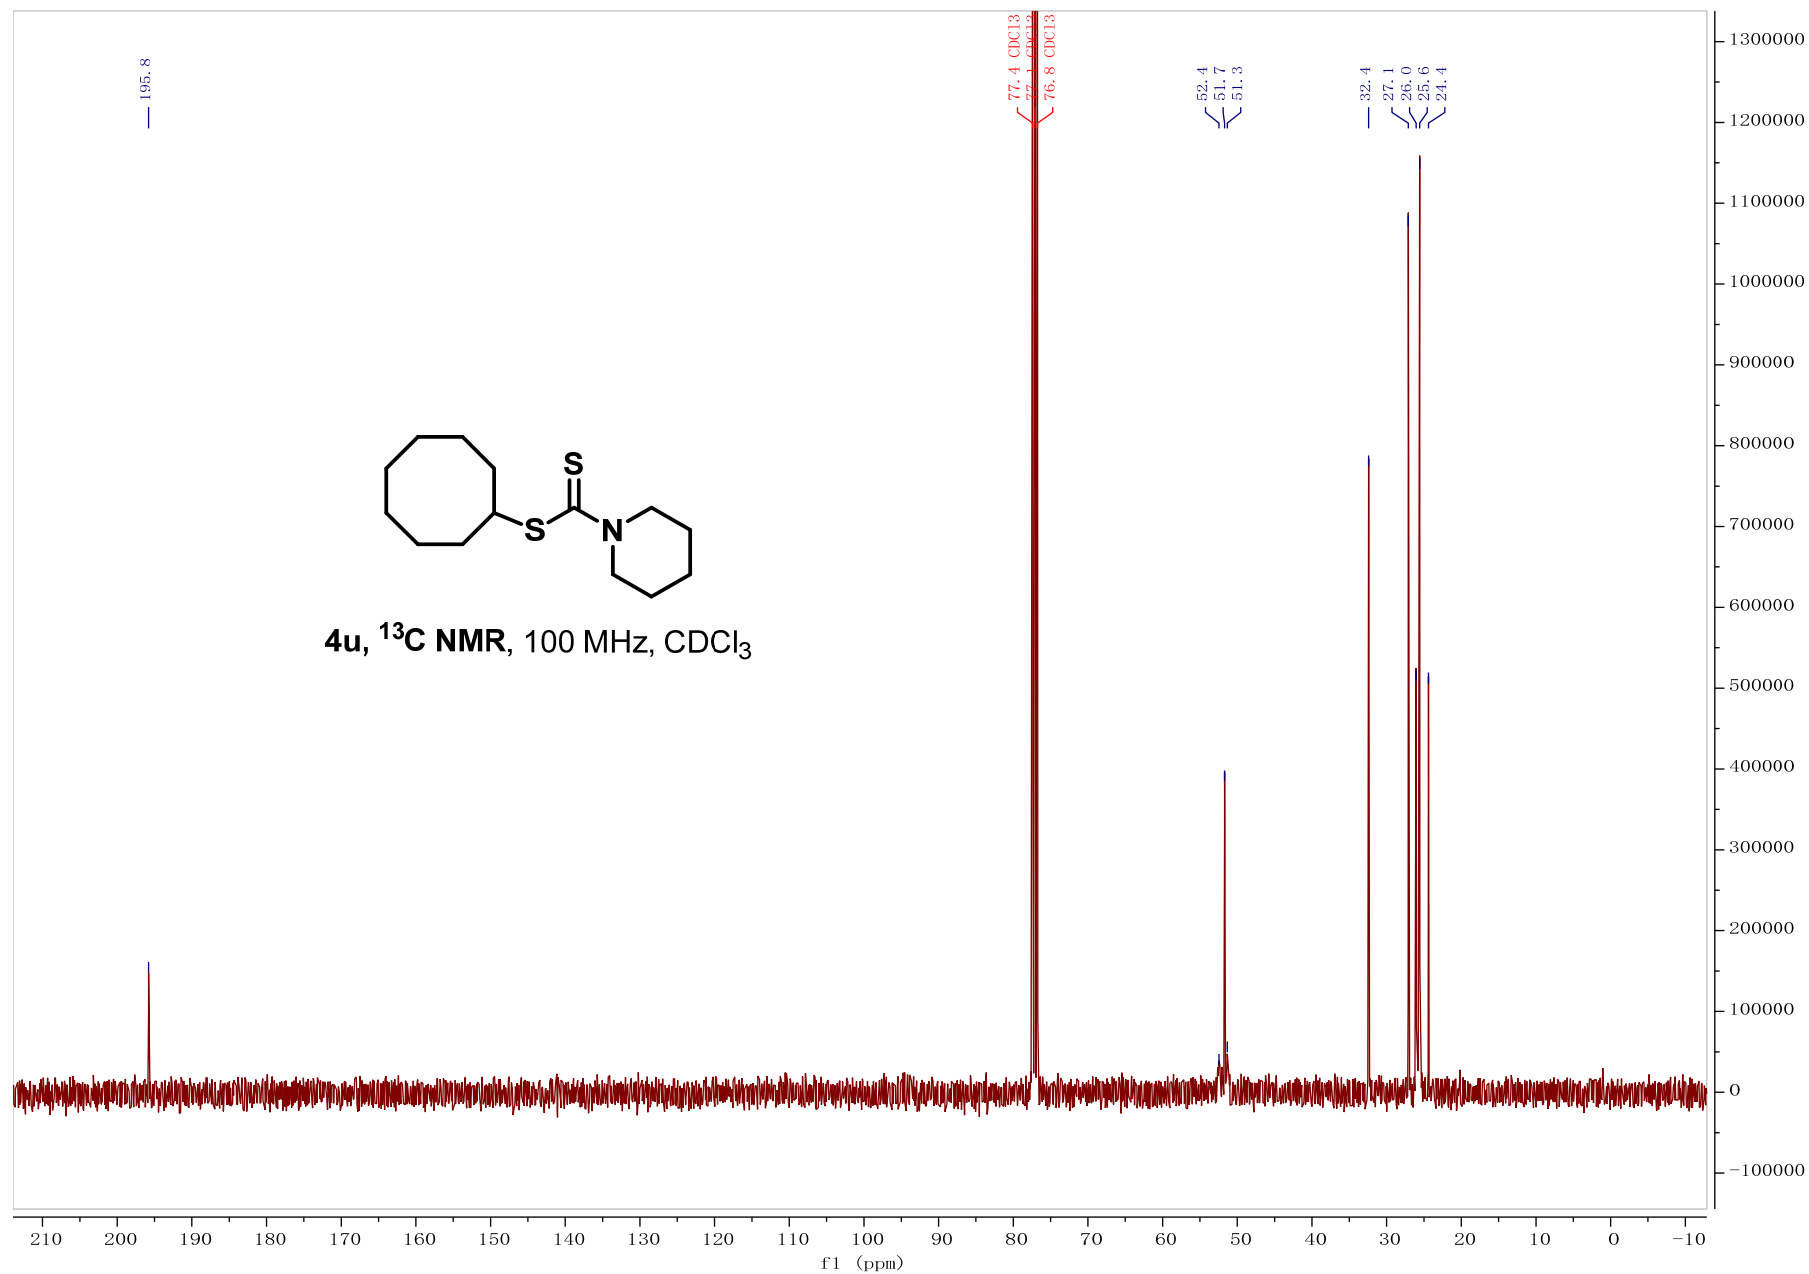



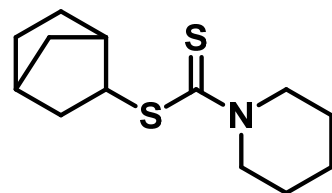

4v,  $^{13}\text{C}$  NMR, 100 MHz,  $\text{CDCl}_3$

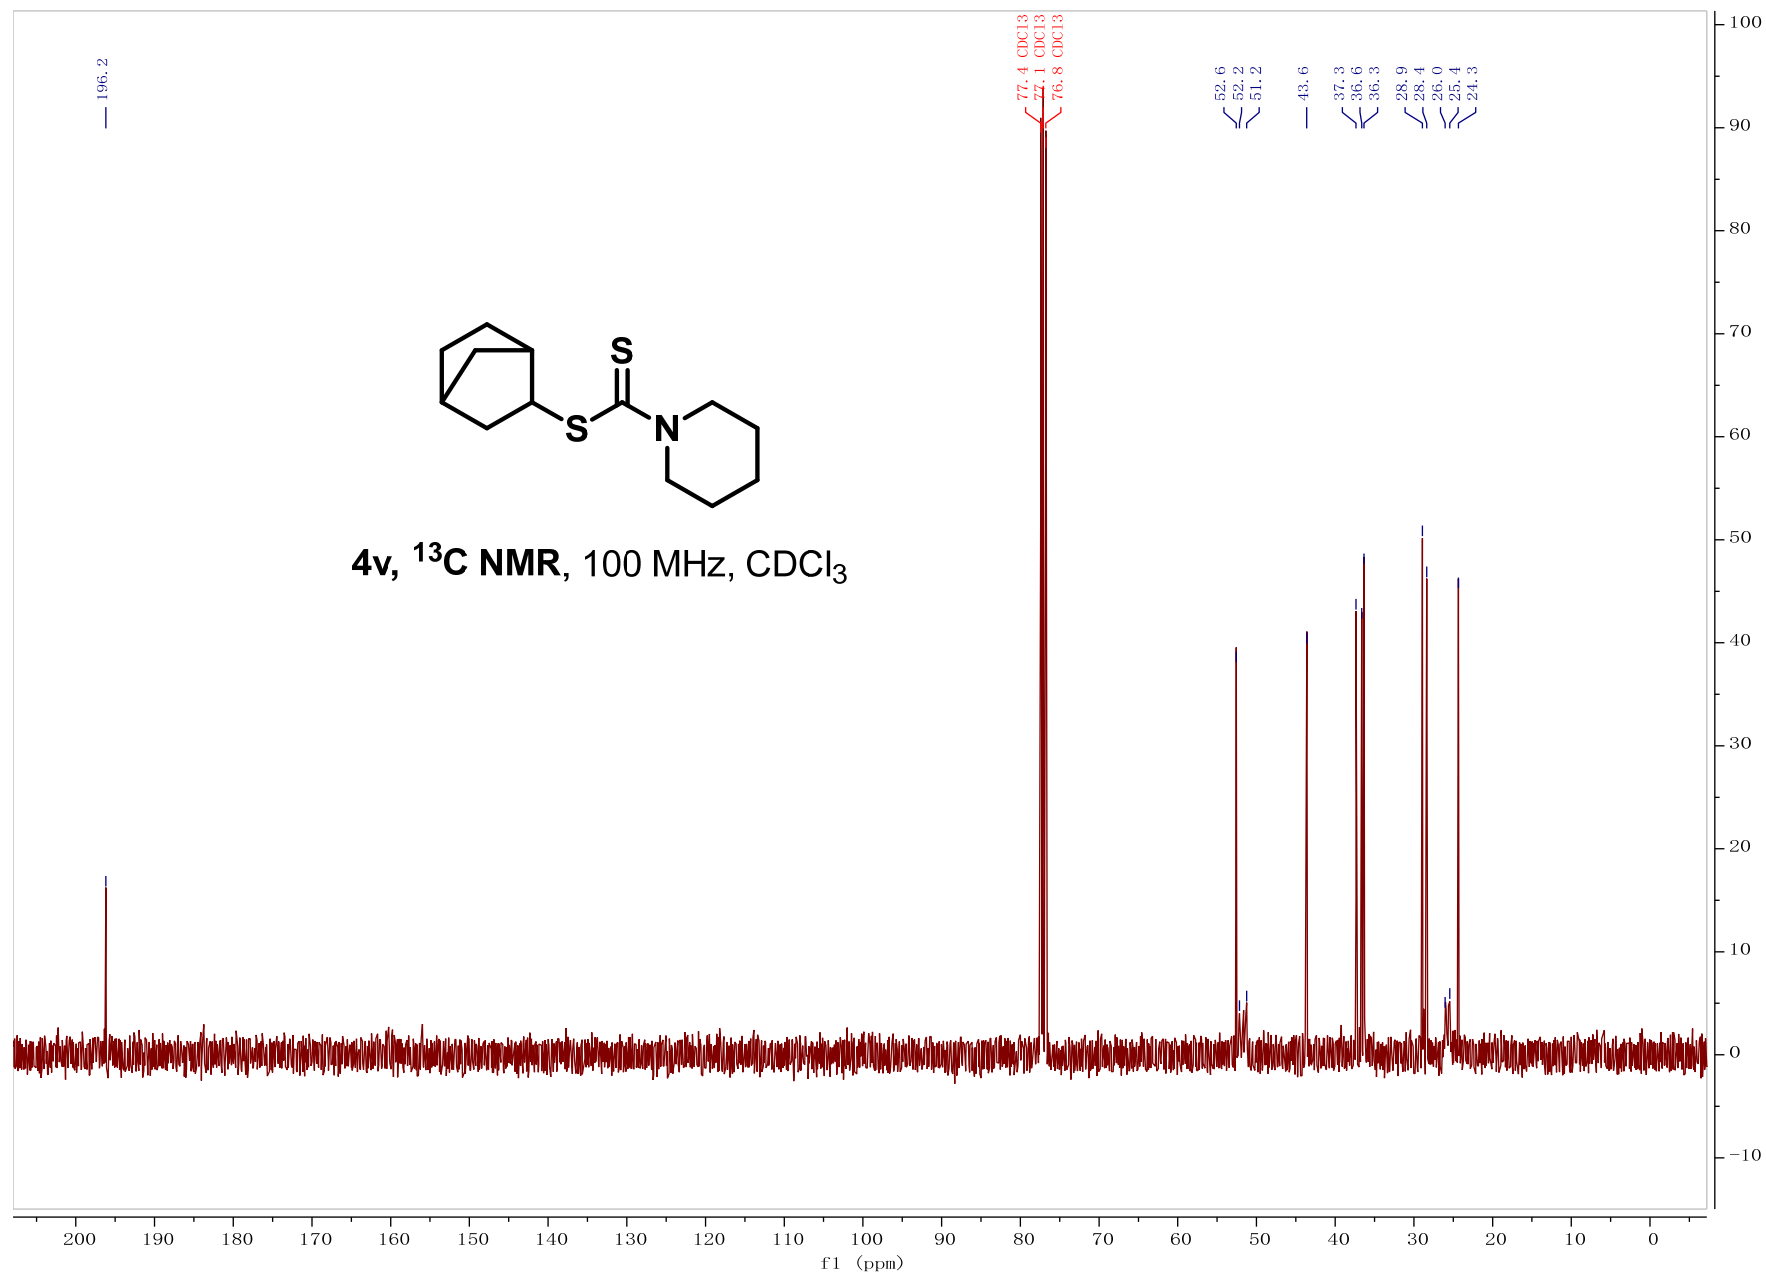

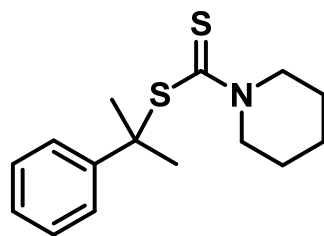

**4w**,  $^1\text{H}$  NMR, 400 MHz,  $\text{CDCl}_3$

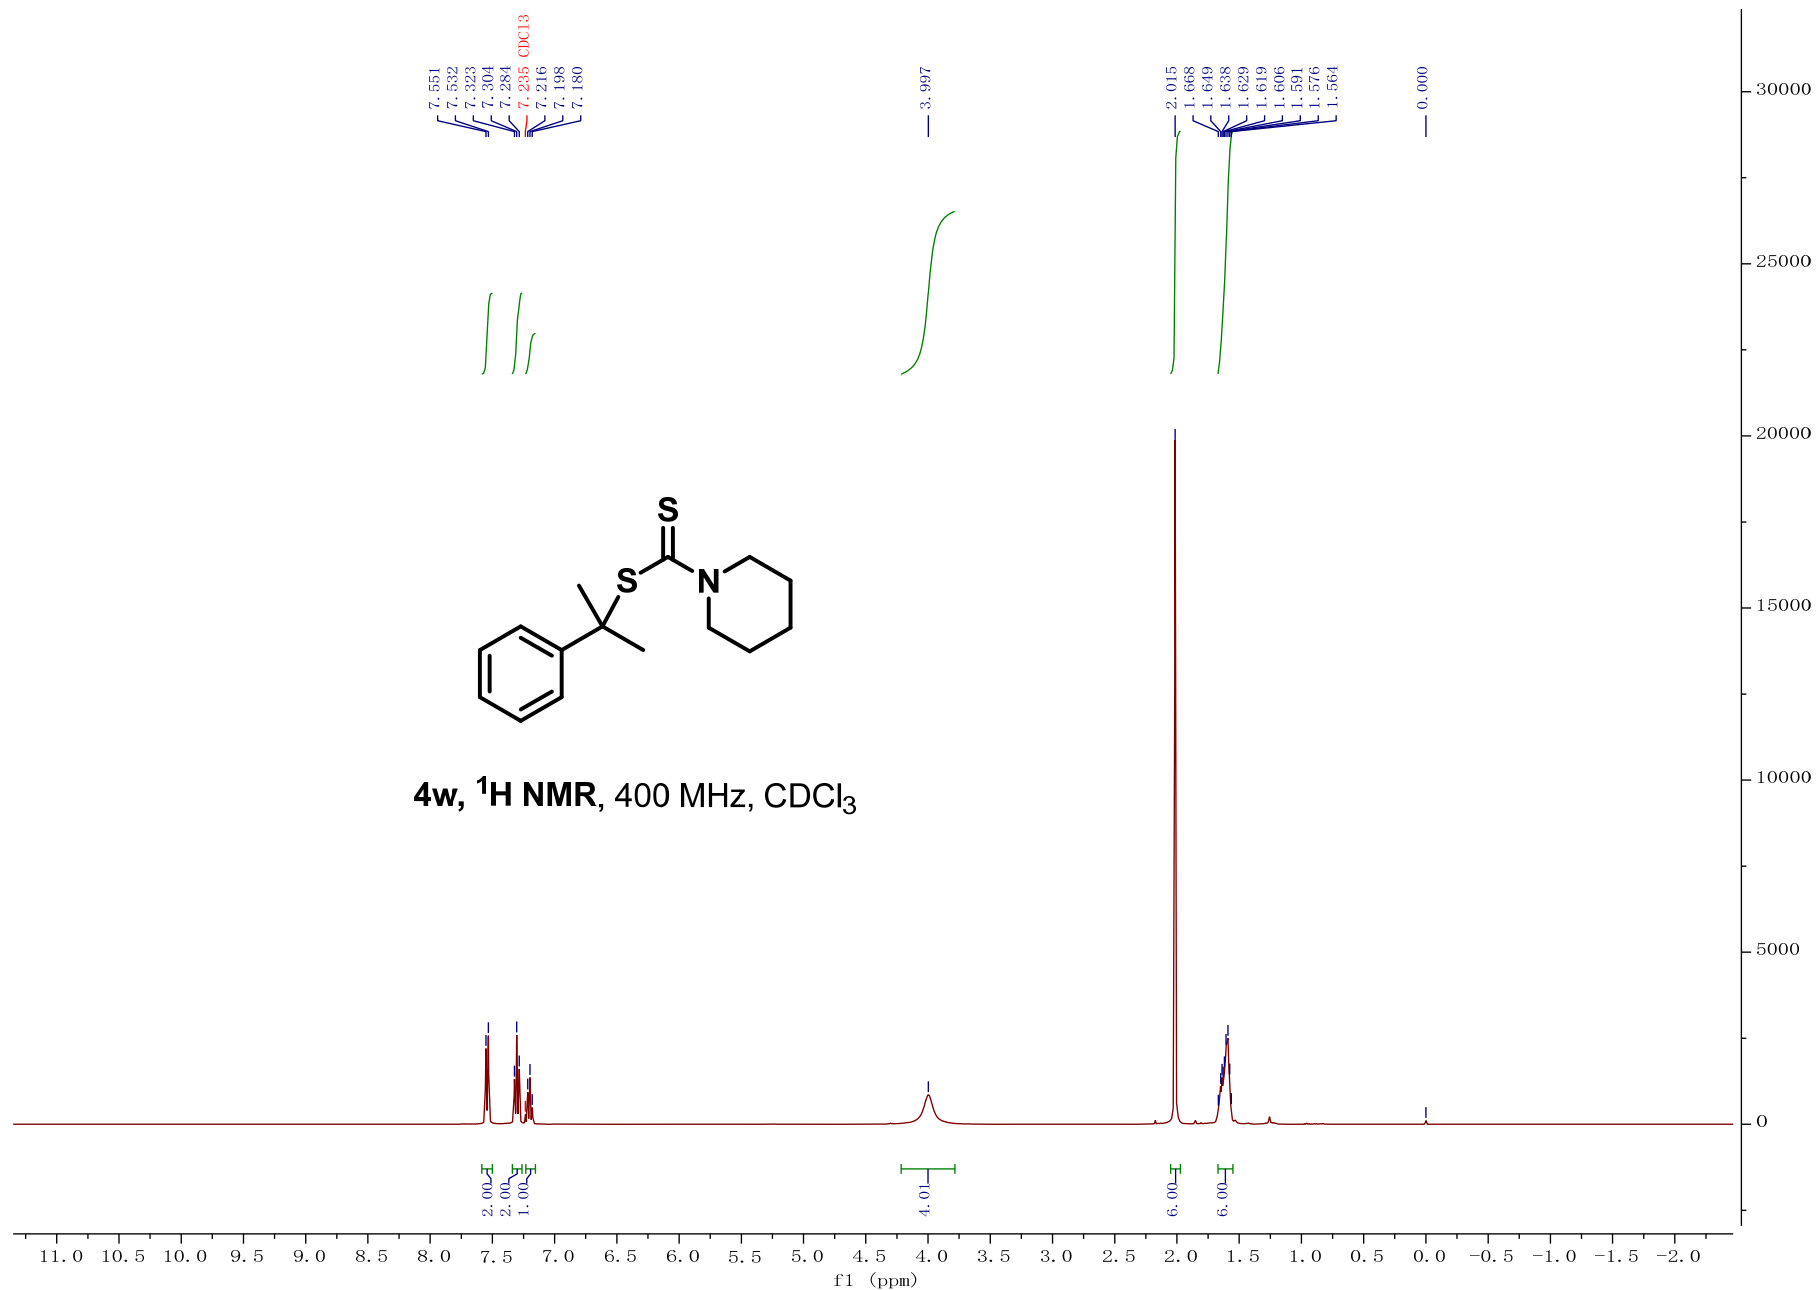

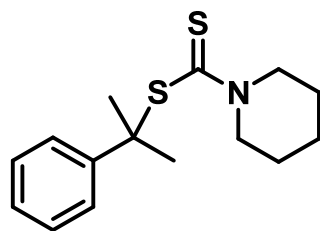

4w,  $^{13}\text{C}$  NMR, 100 MHz,  $\text{CDCl}_3$

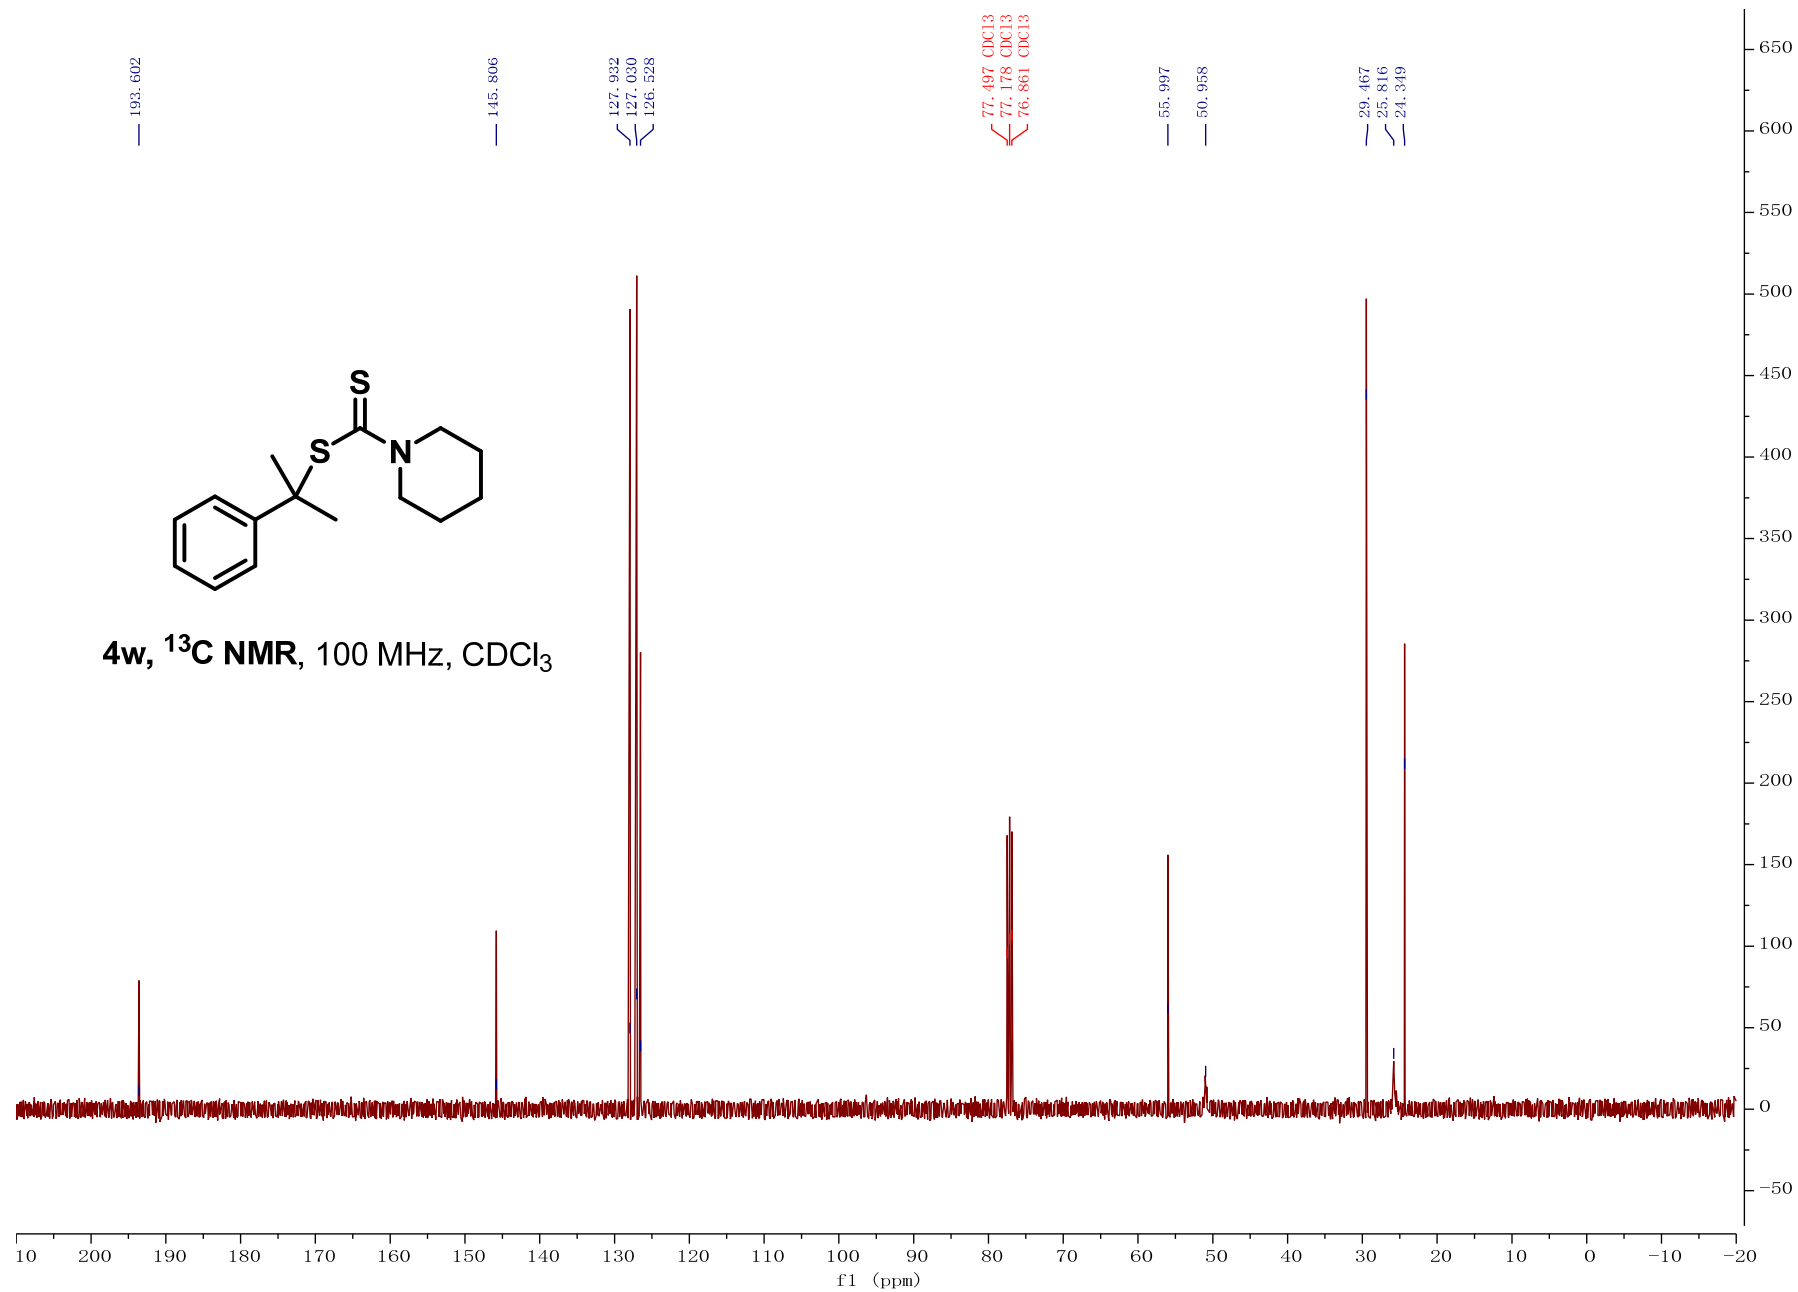

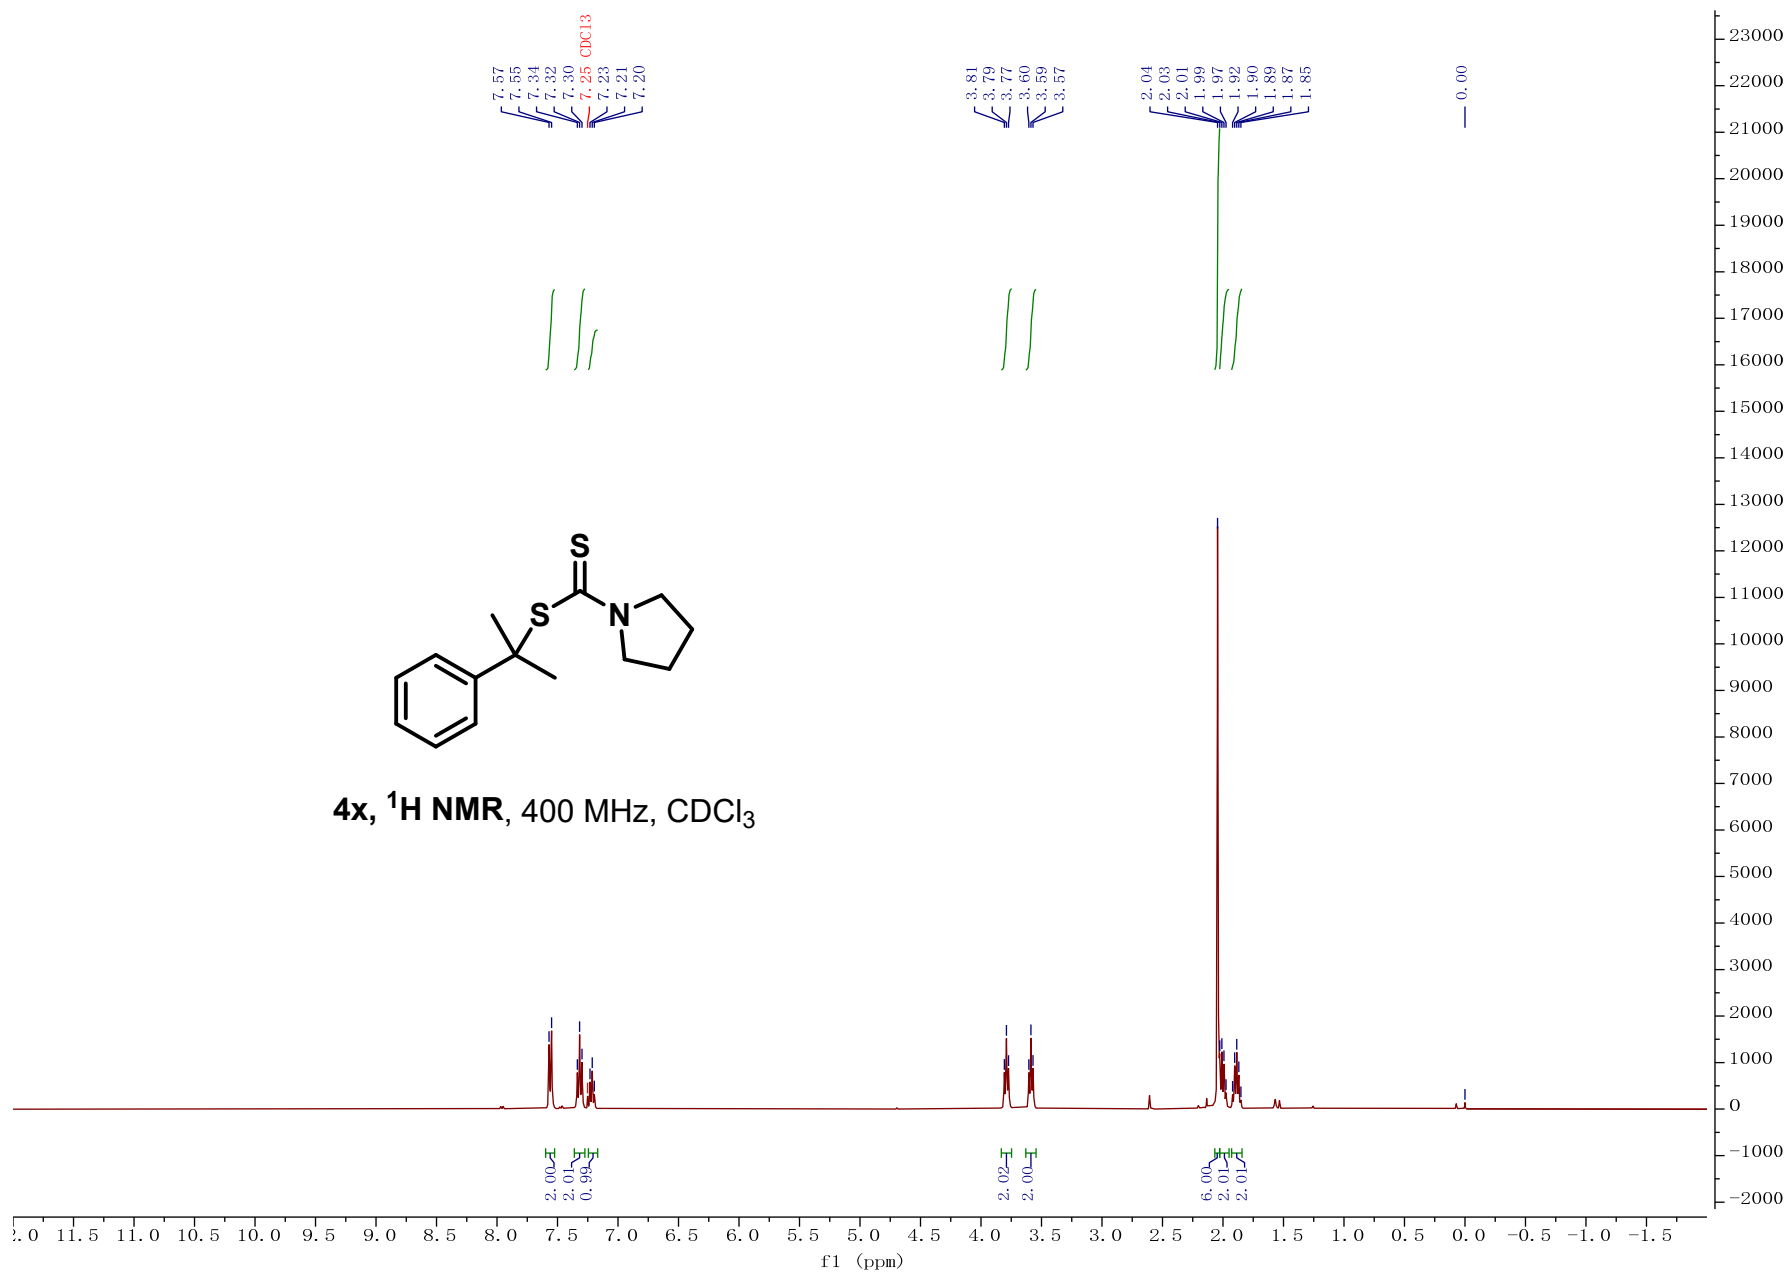

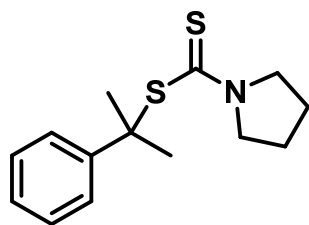

**4x**,  $^{13}\text{C}$  NMR, 100 MHz,  $\text{CDCl}_3$

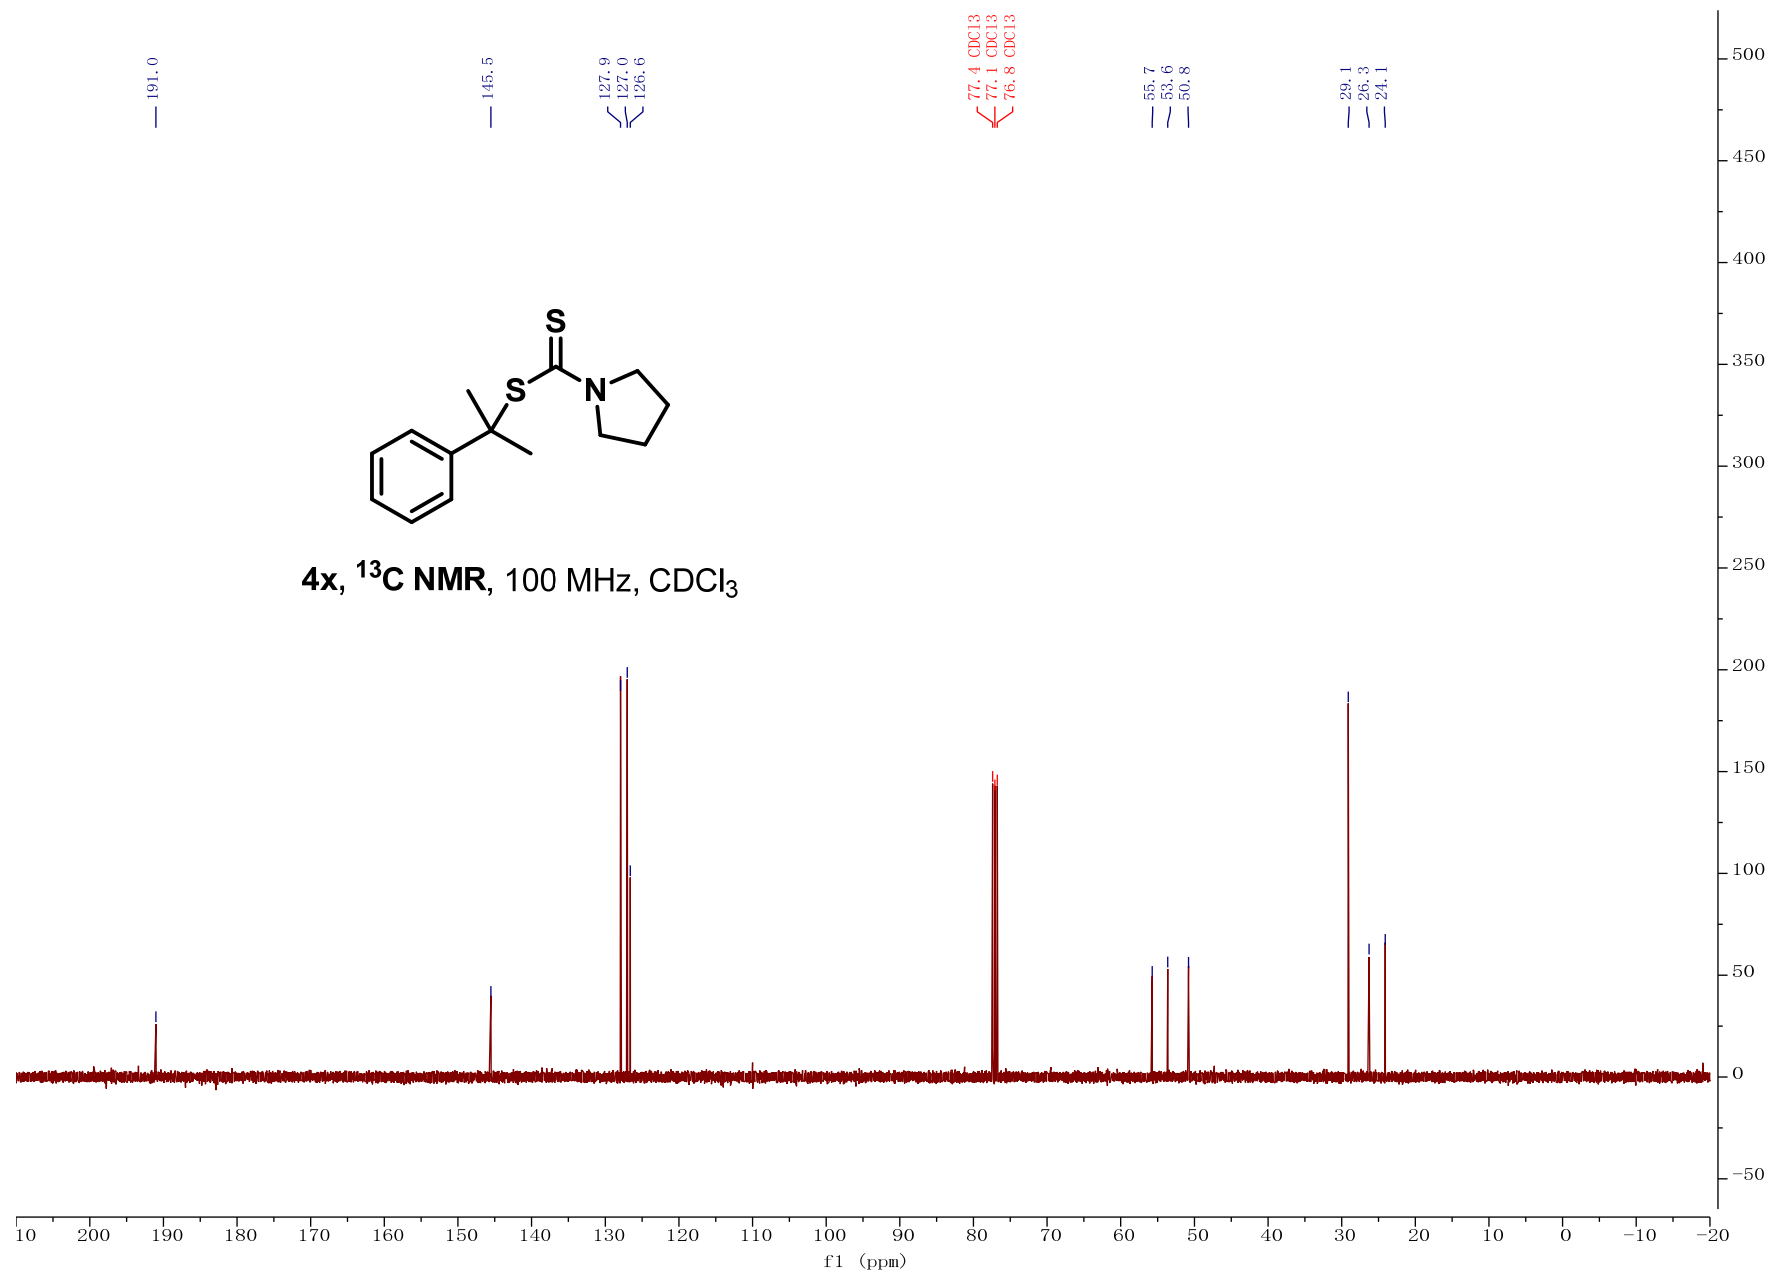

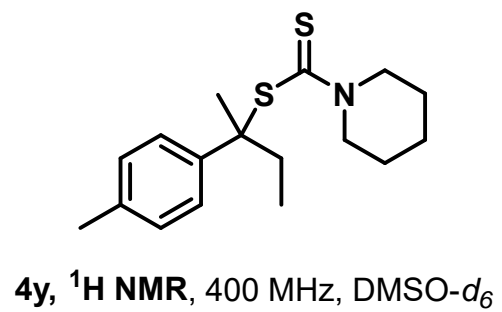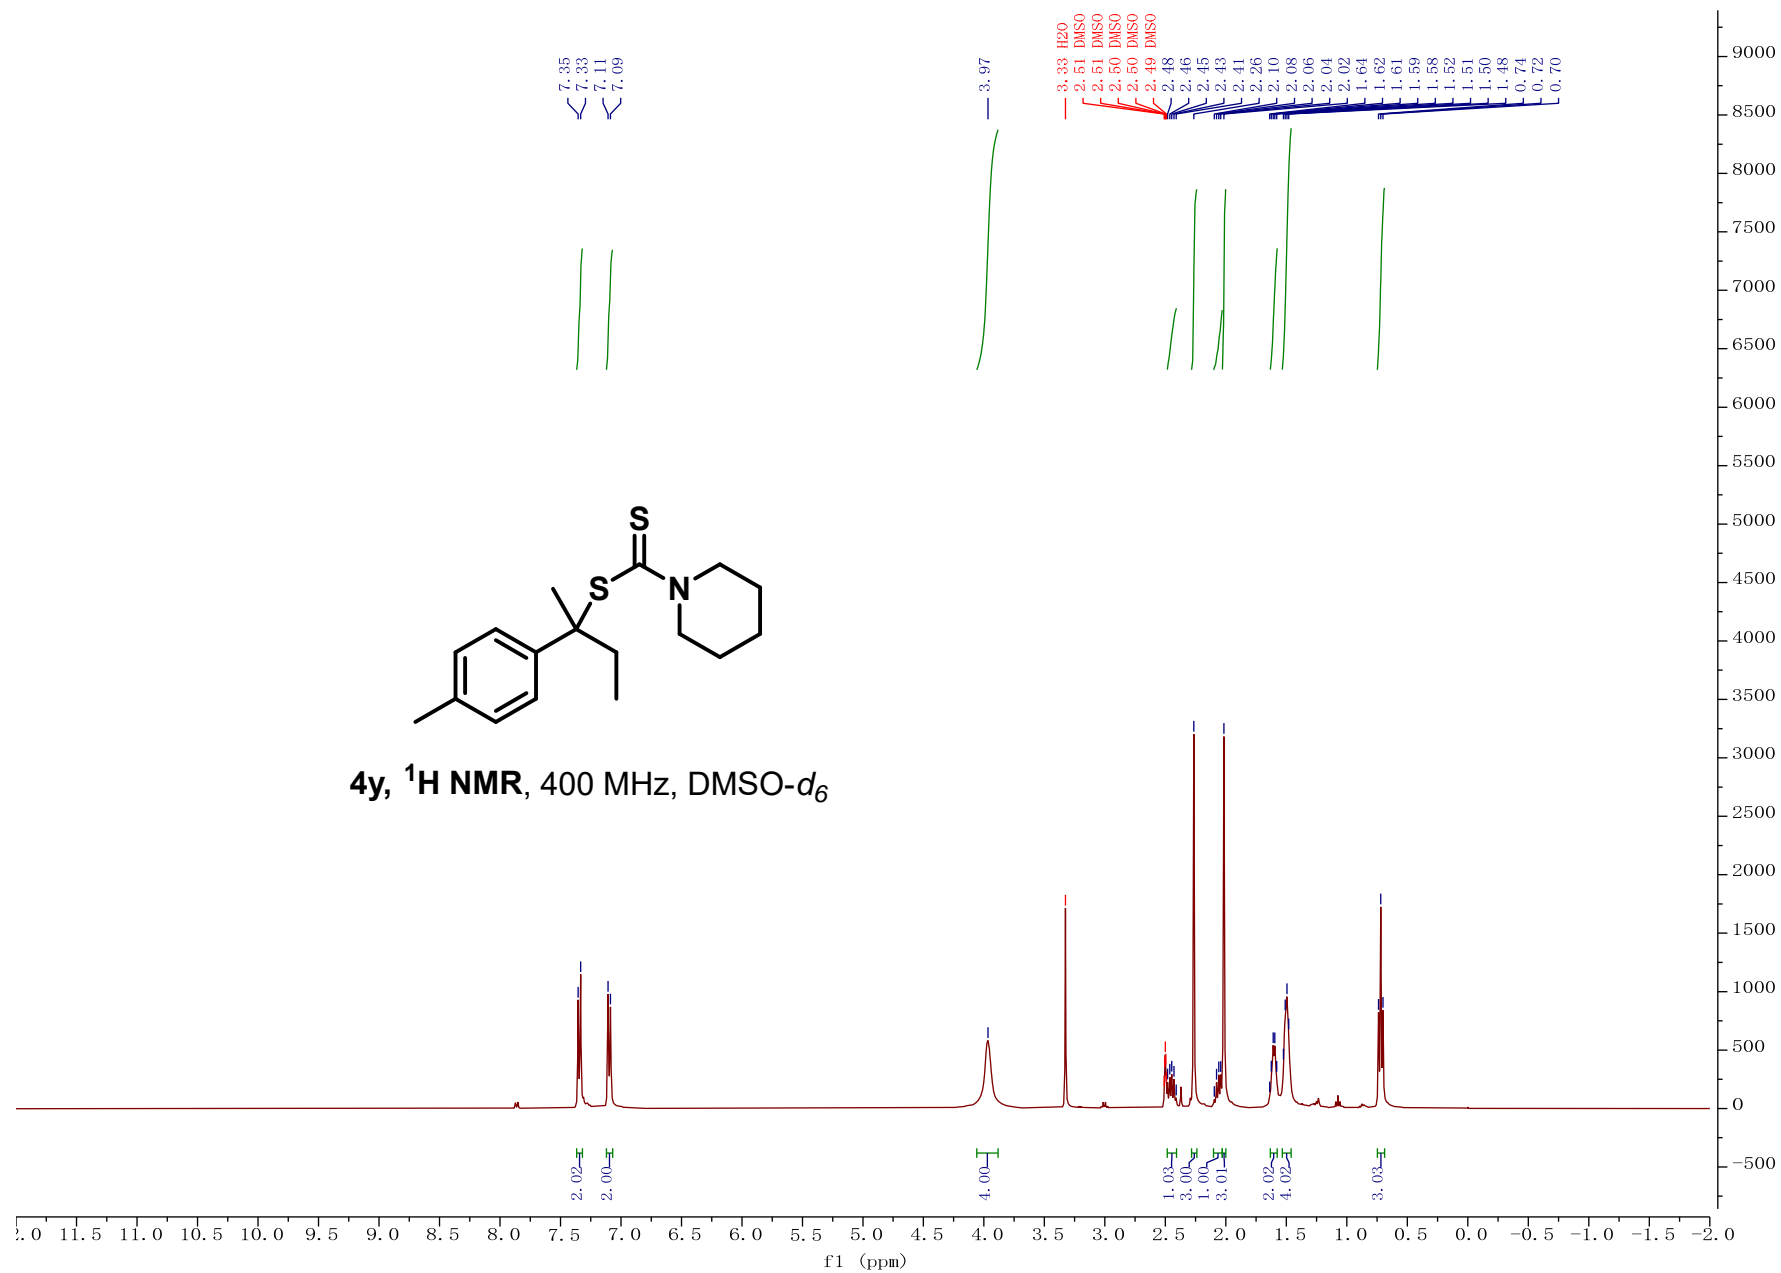

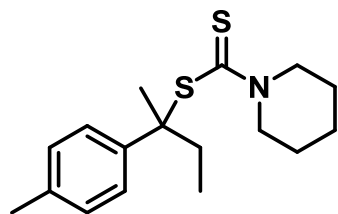

4y,  $^{13}\text{C}$  NMR, 100 MHz,  $\text{DMSO}-d_6$

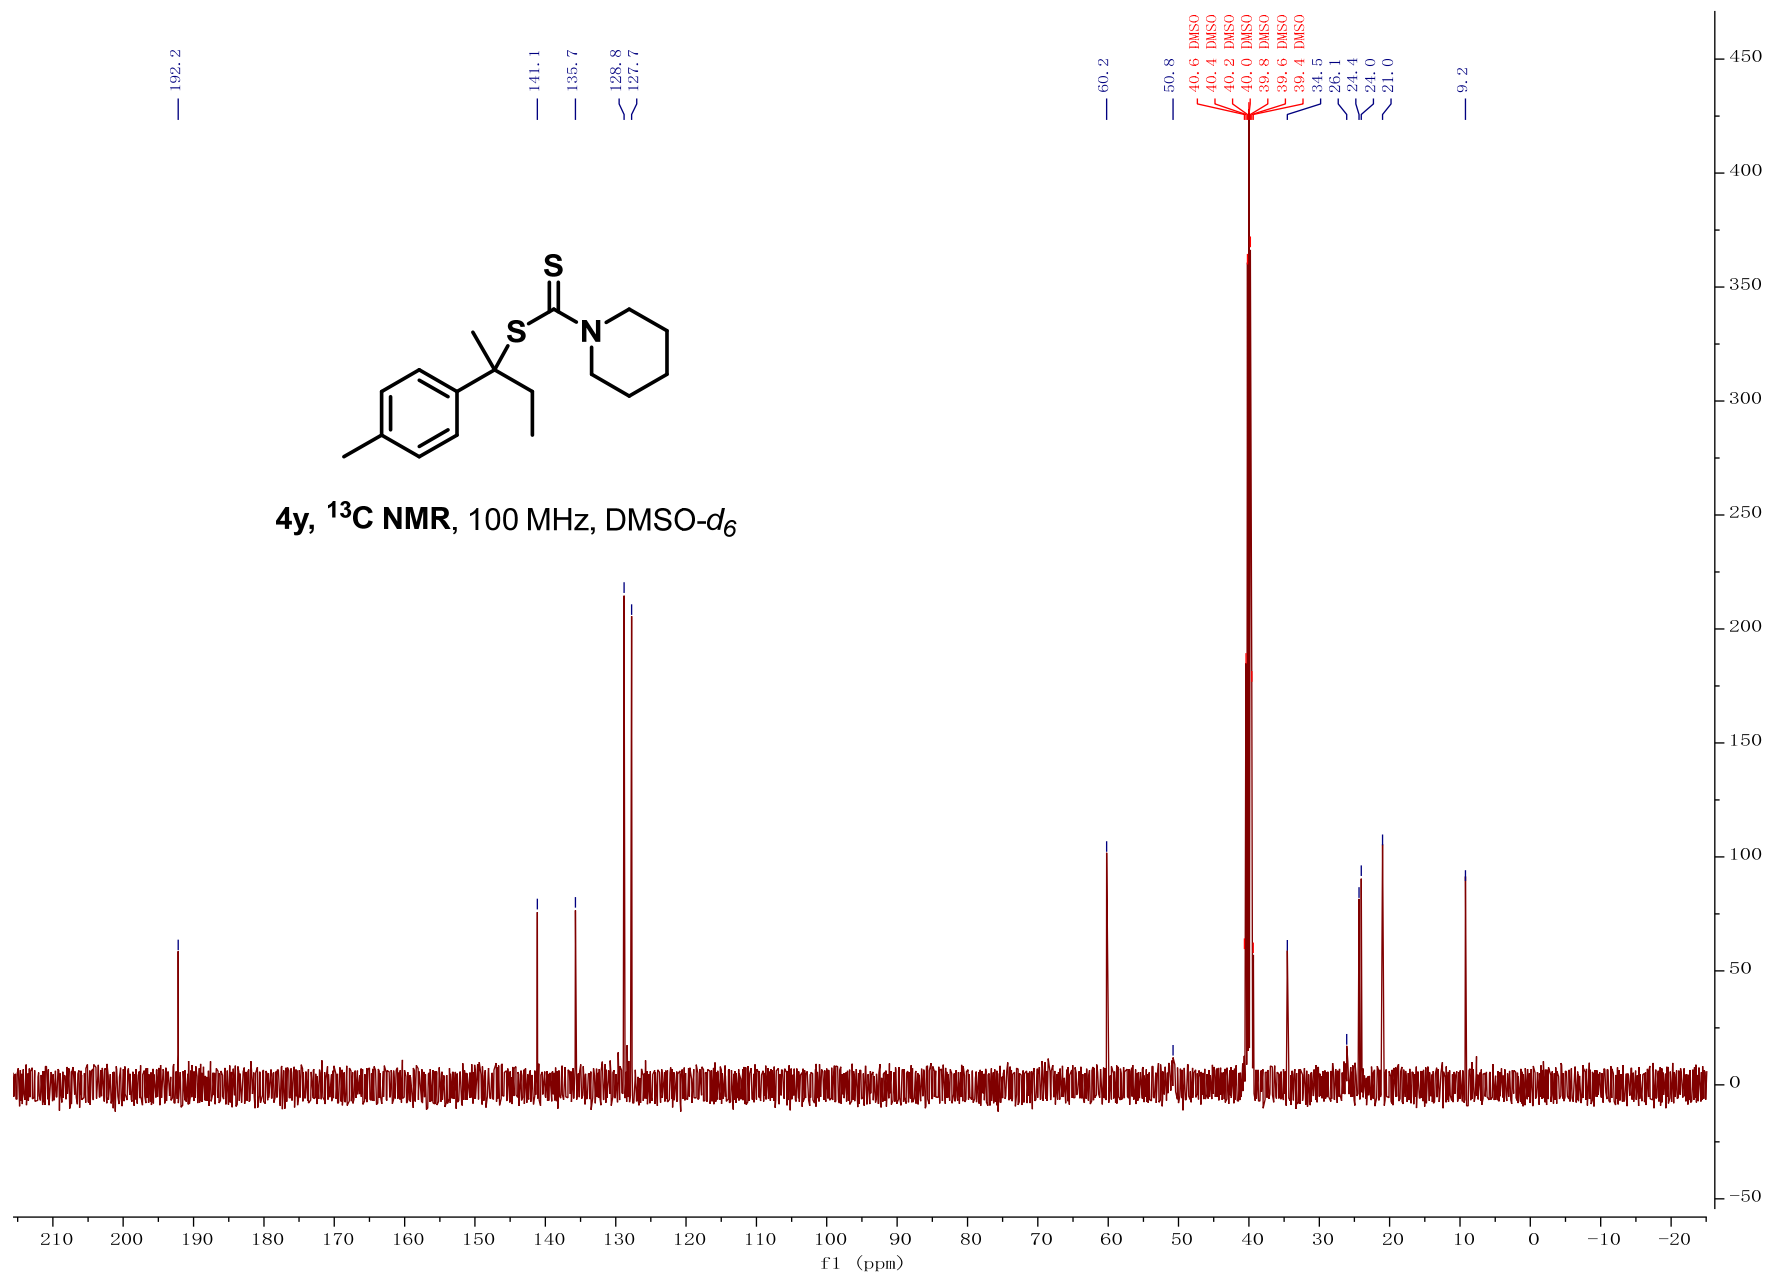

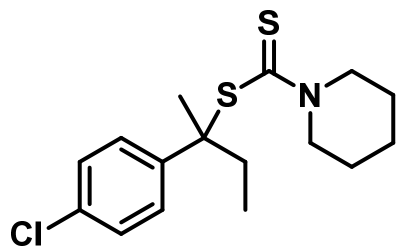

**4z**,  $^1\text{H}$  NMR, 400 MHz,  $\text{CDCl}_3$

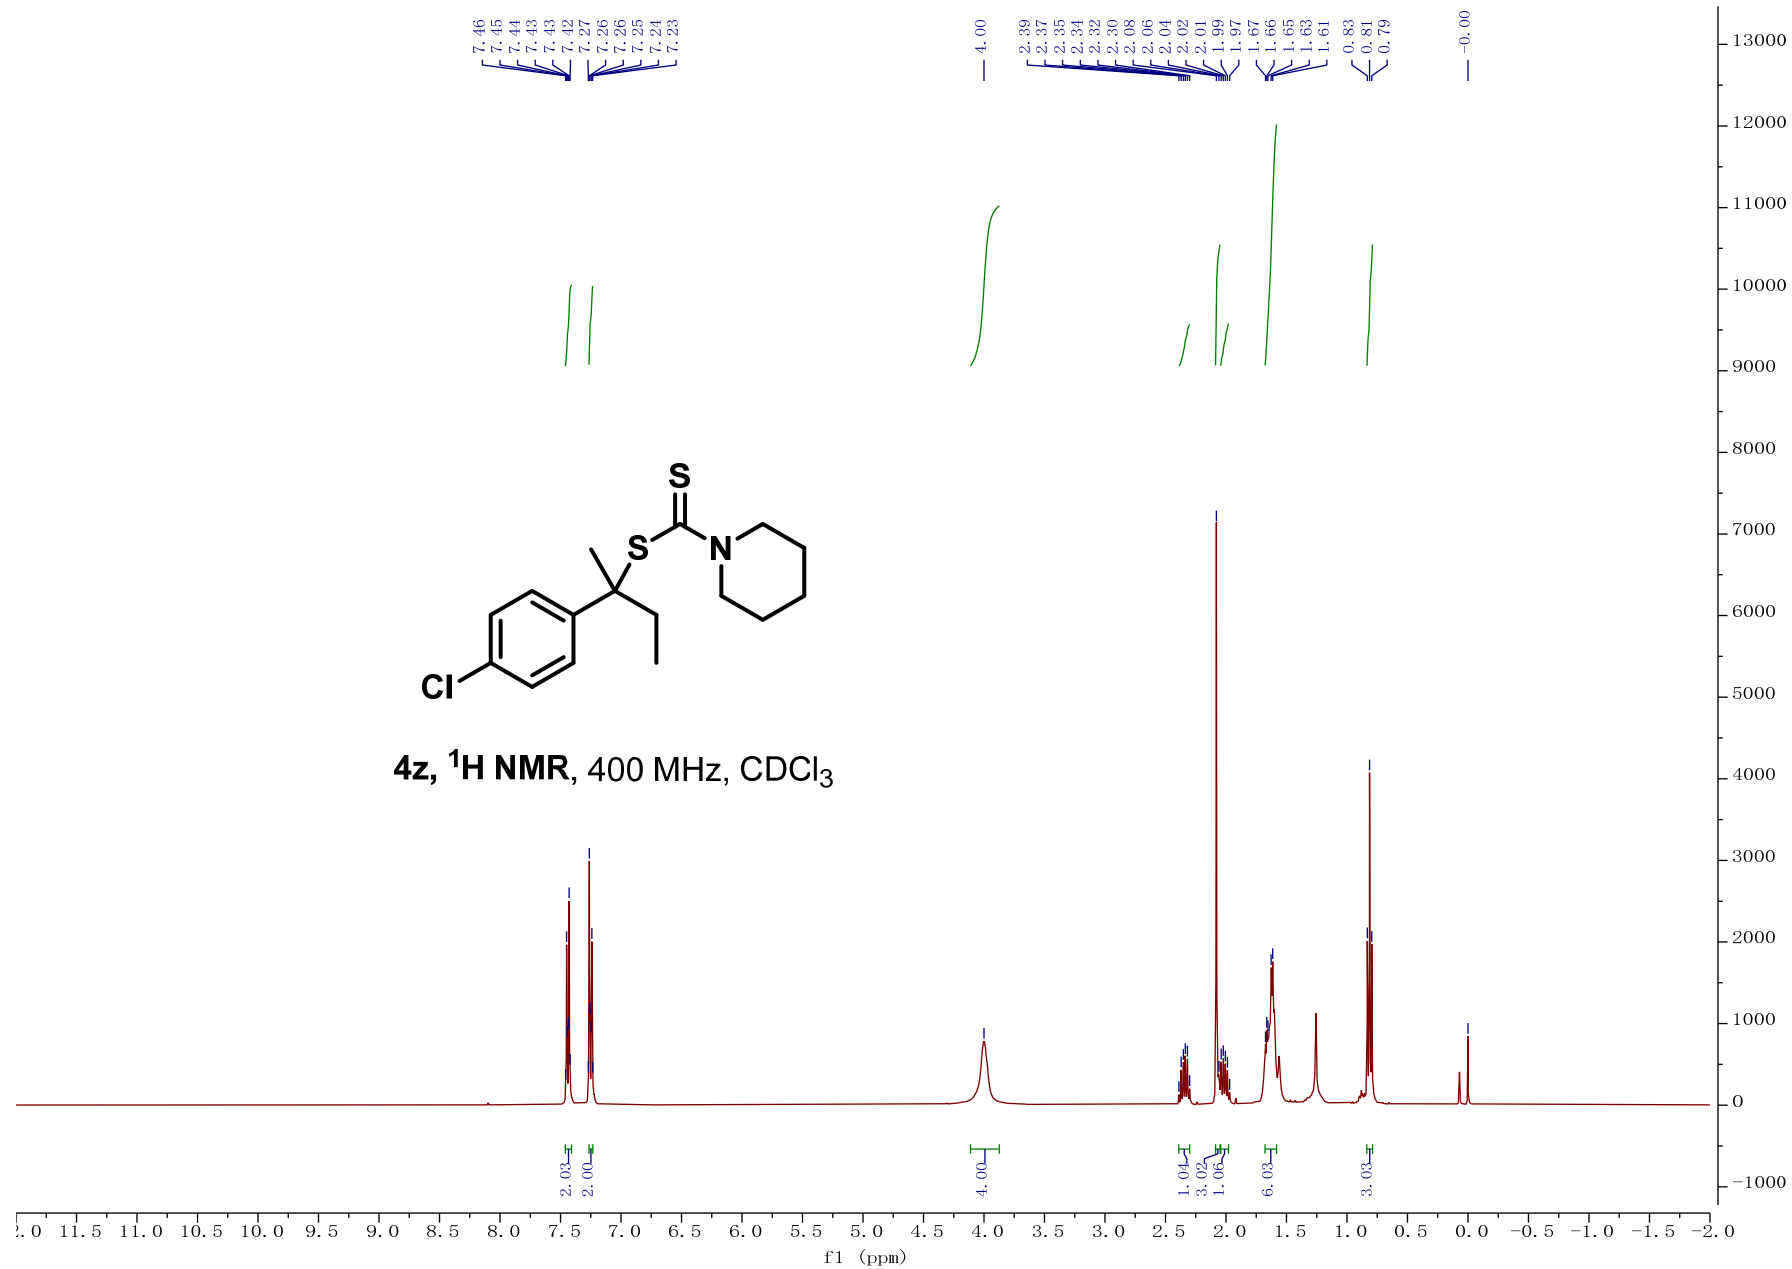

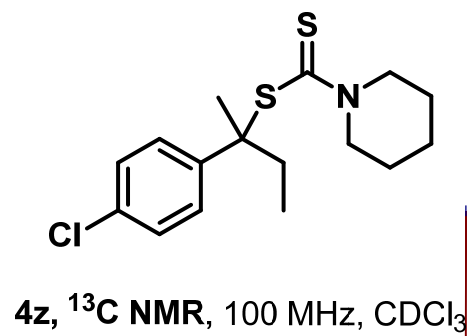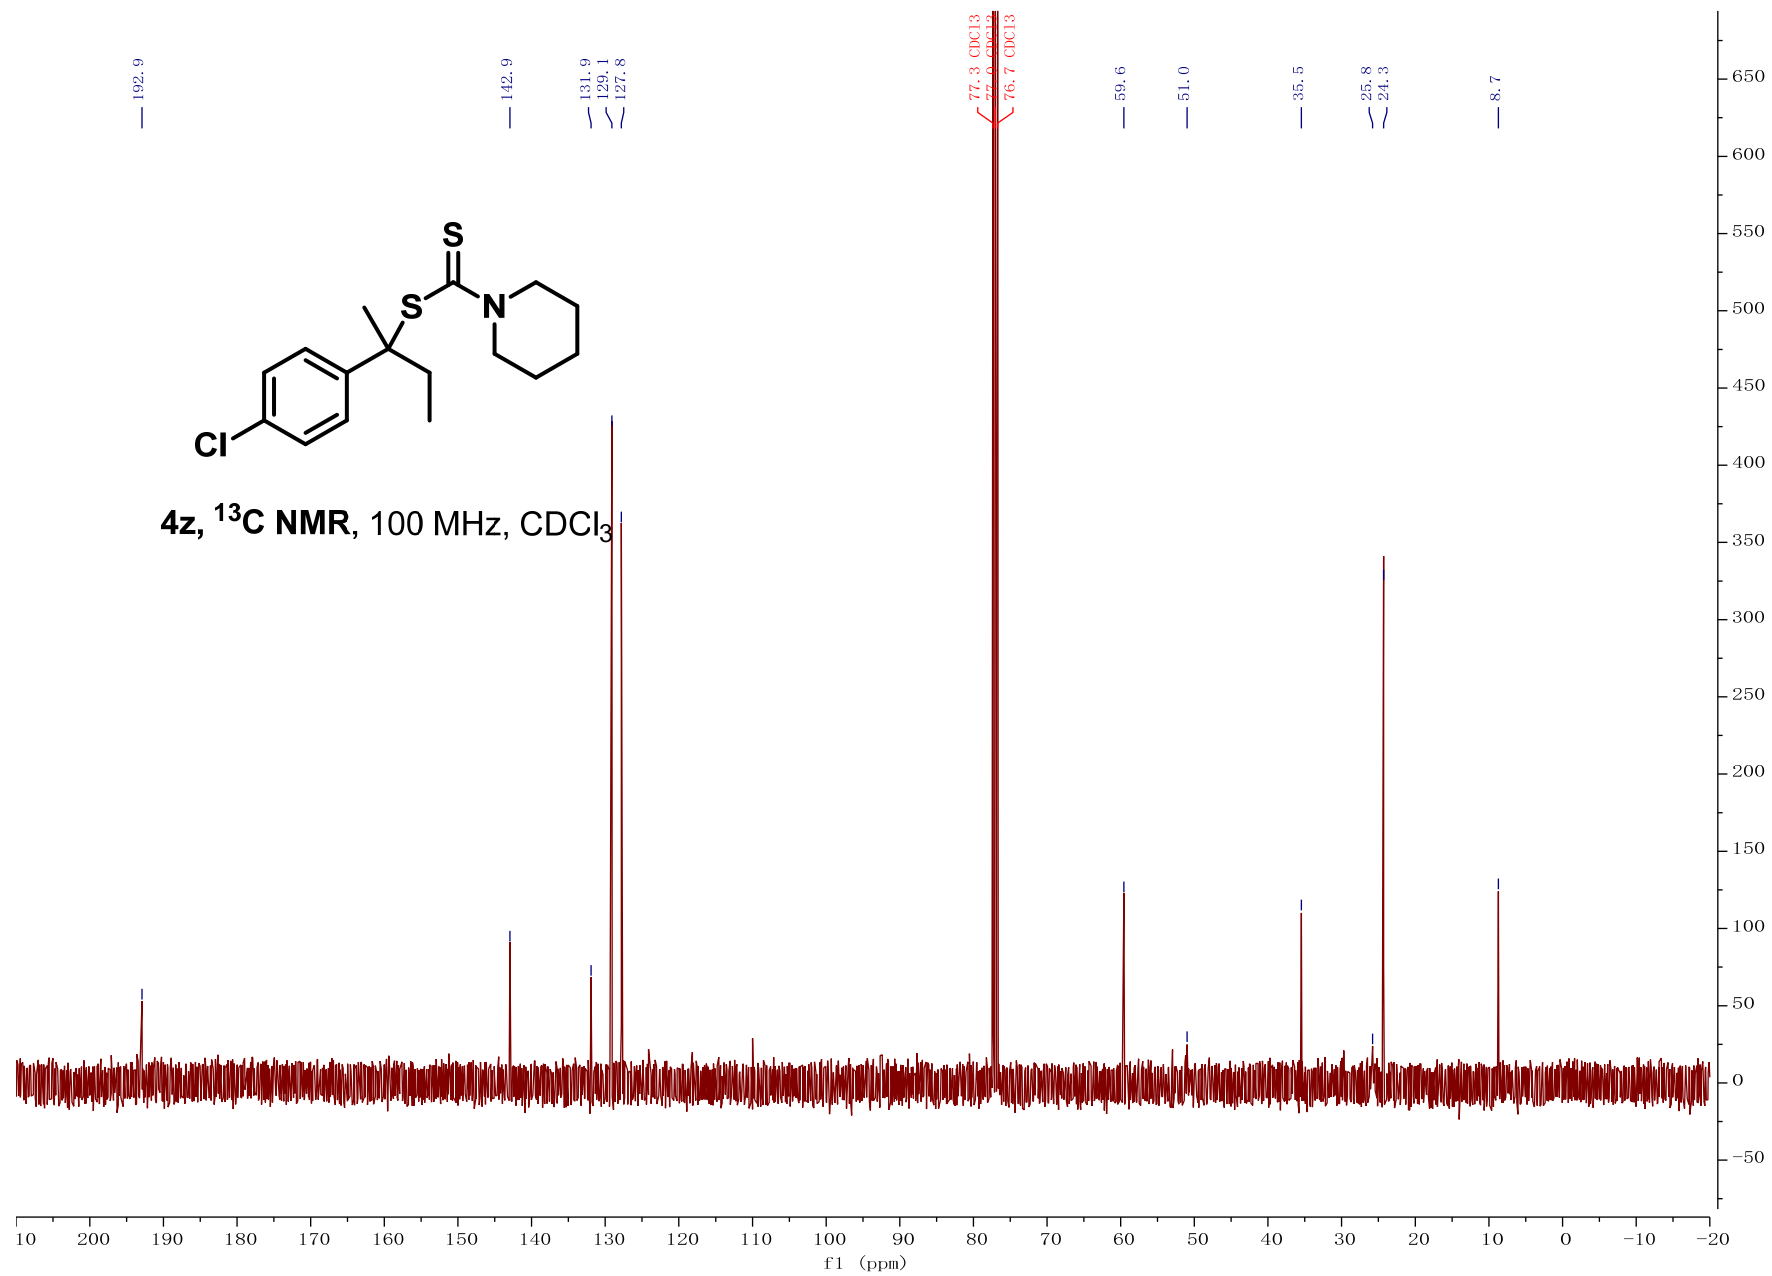

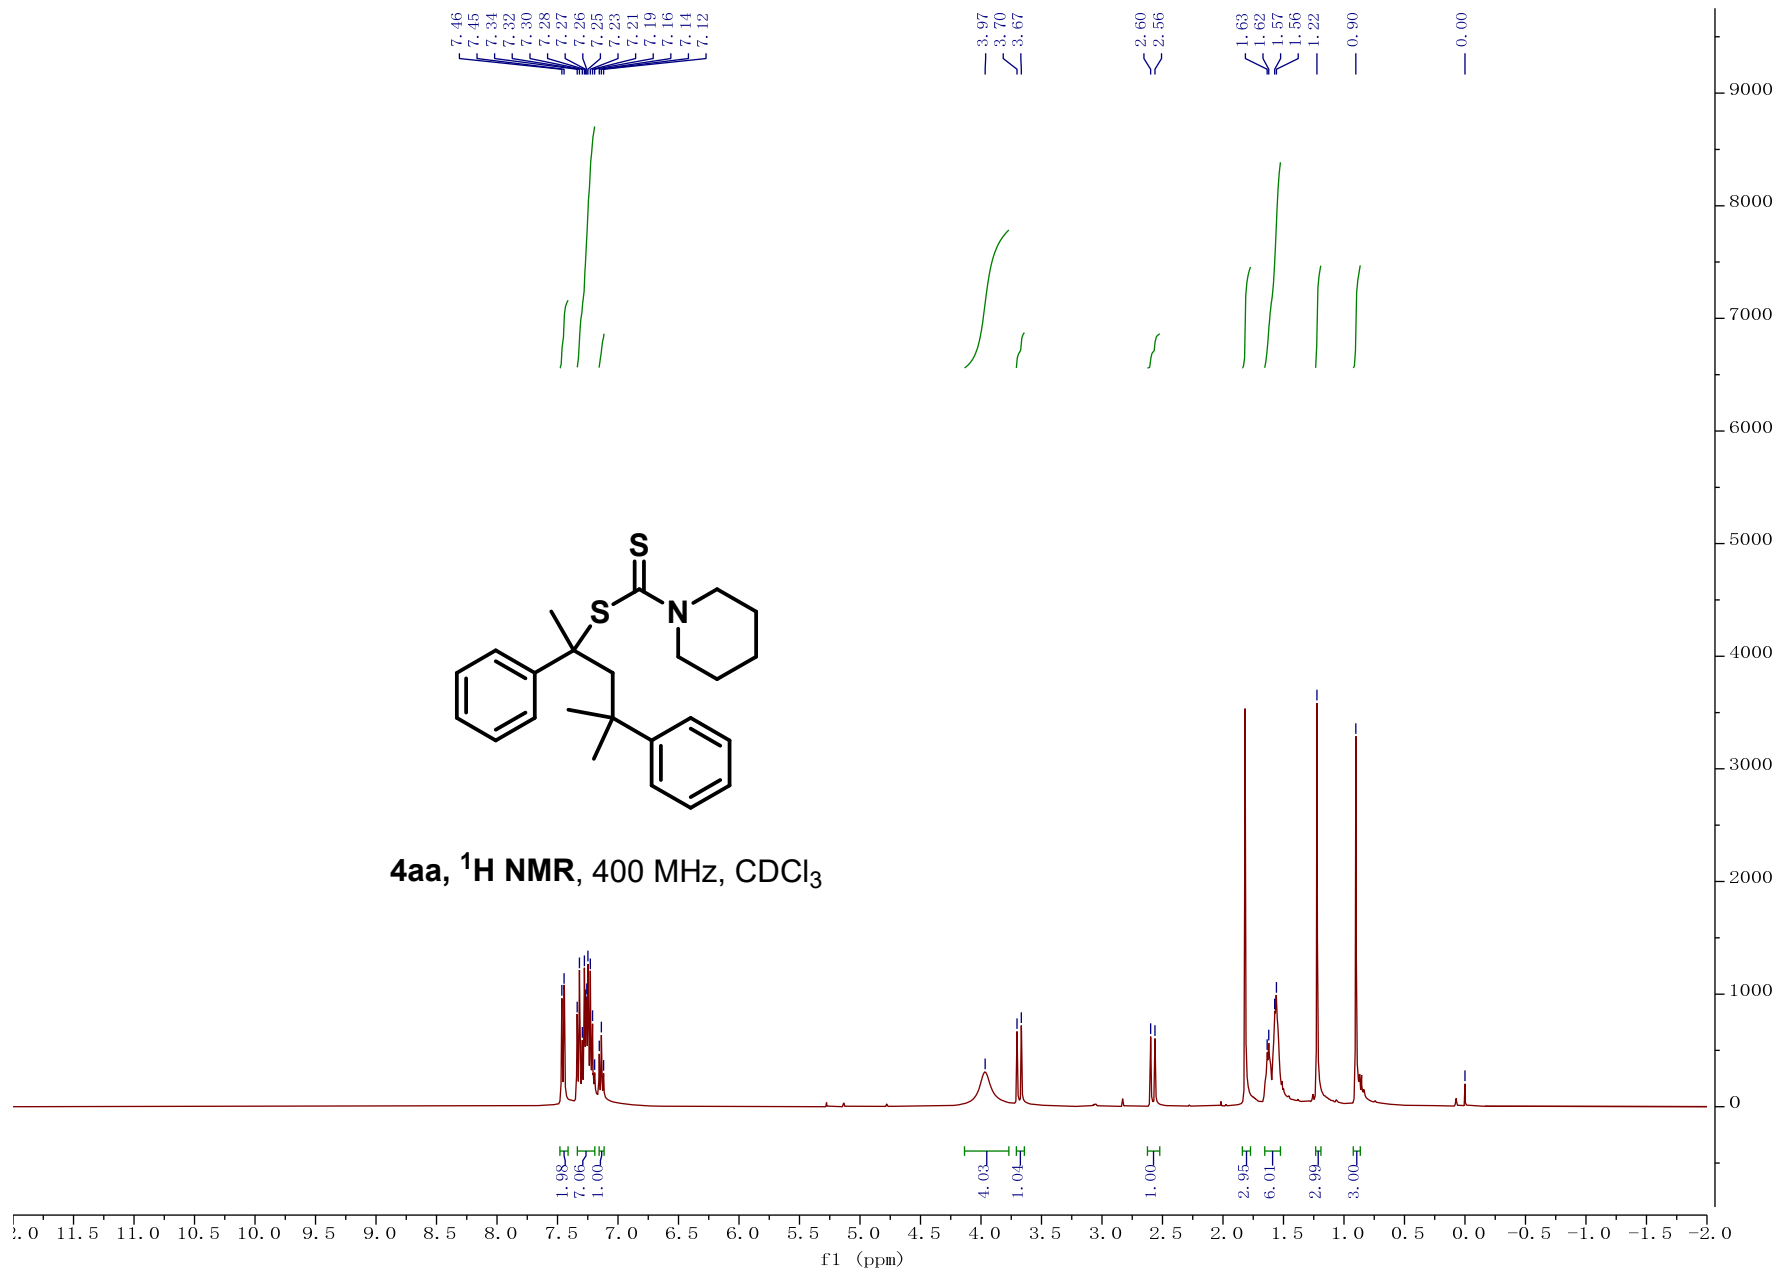

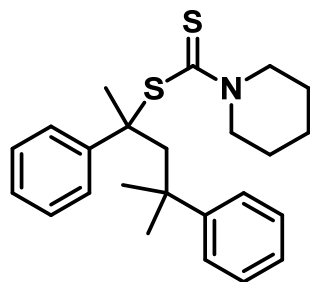

4aa,  $^{13}\text{C}$  NMR, 100 MHz,  $\text{CDCl}_3$

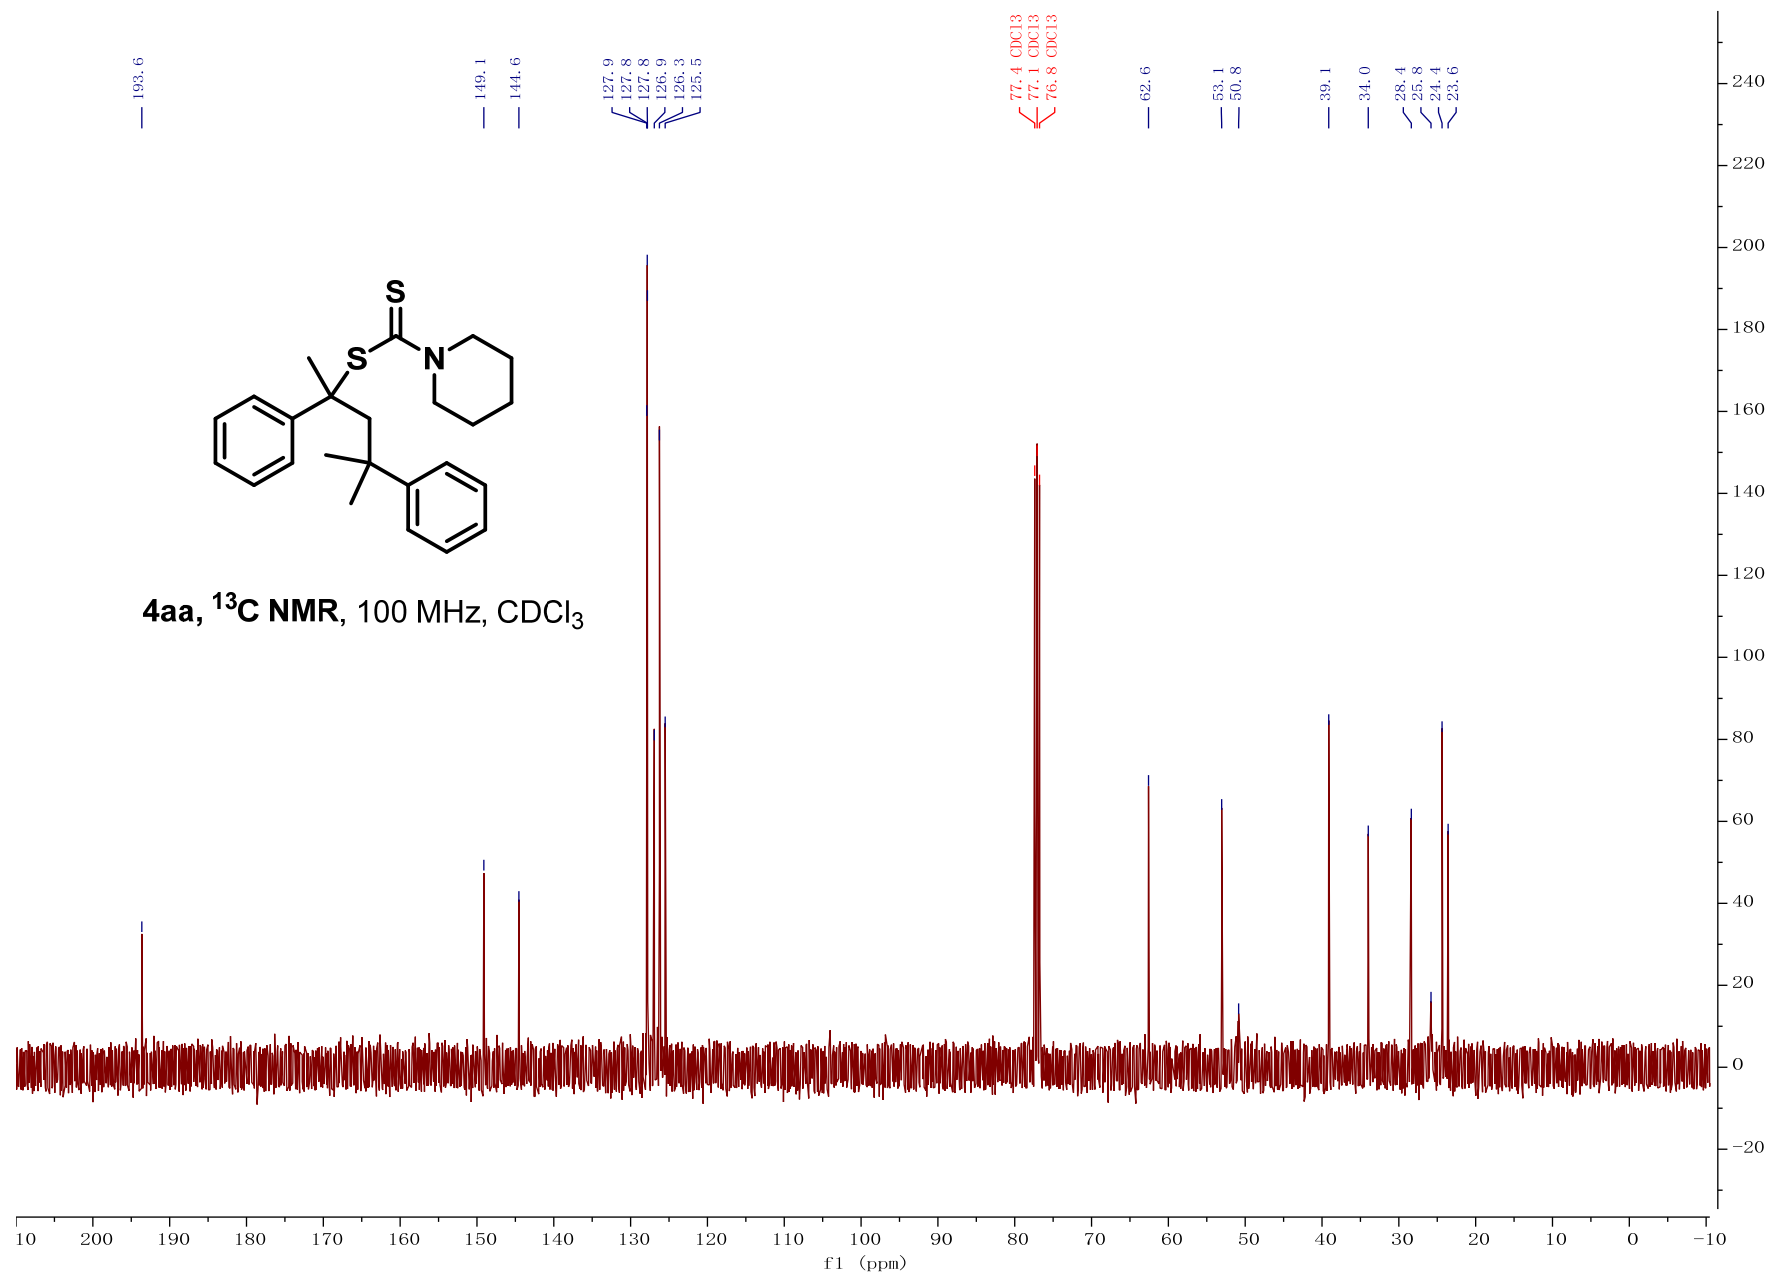

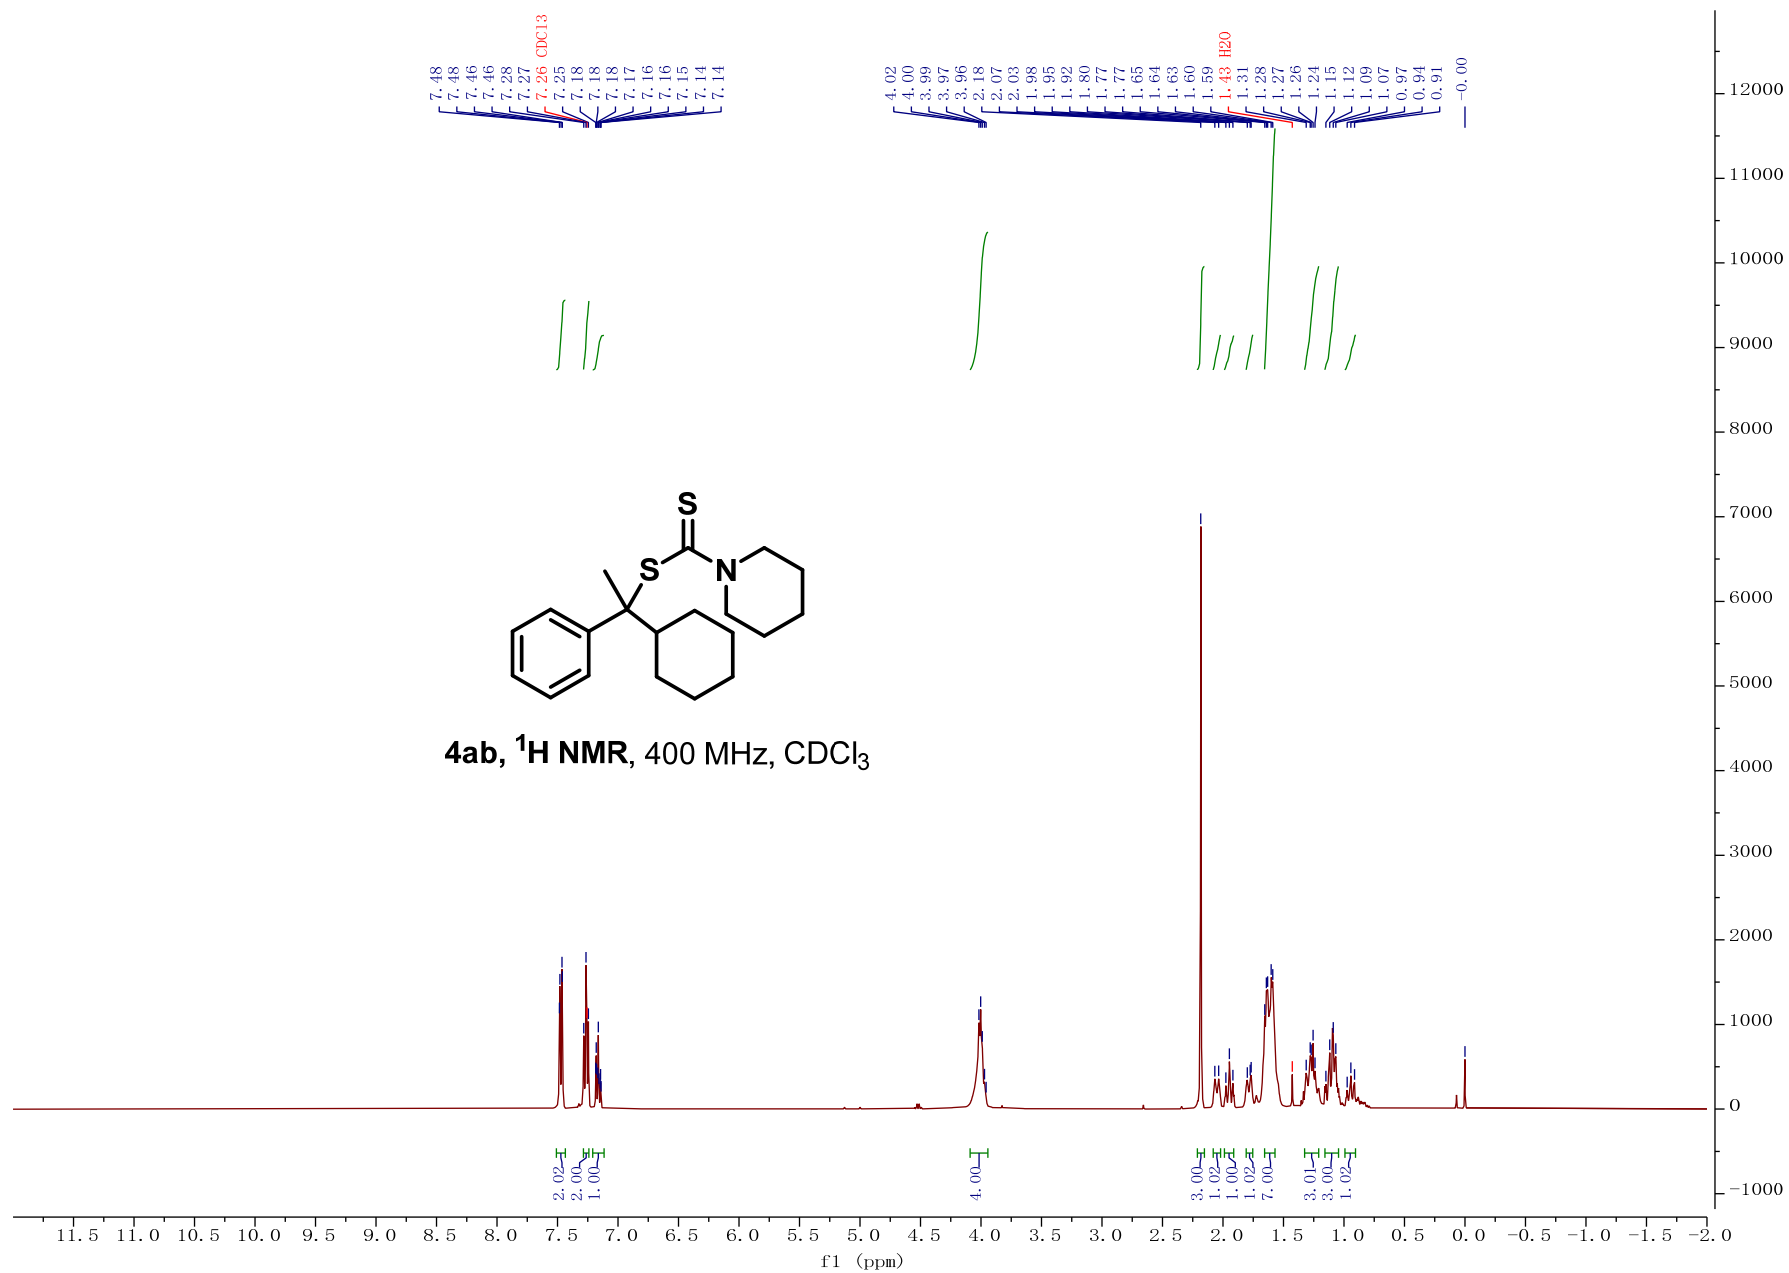

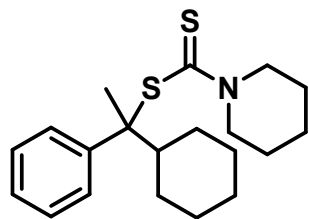

**4ab**,  $^{13}\text{C}$  NMR, 100 MHz,  $\text{CDCl}_3$

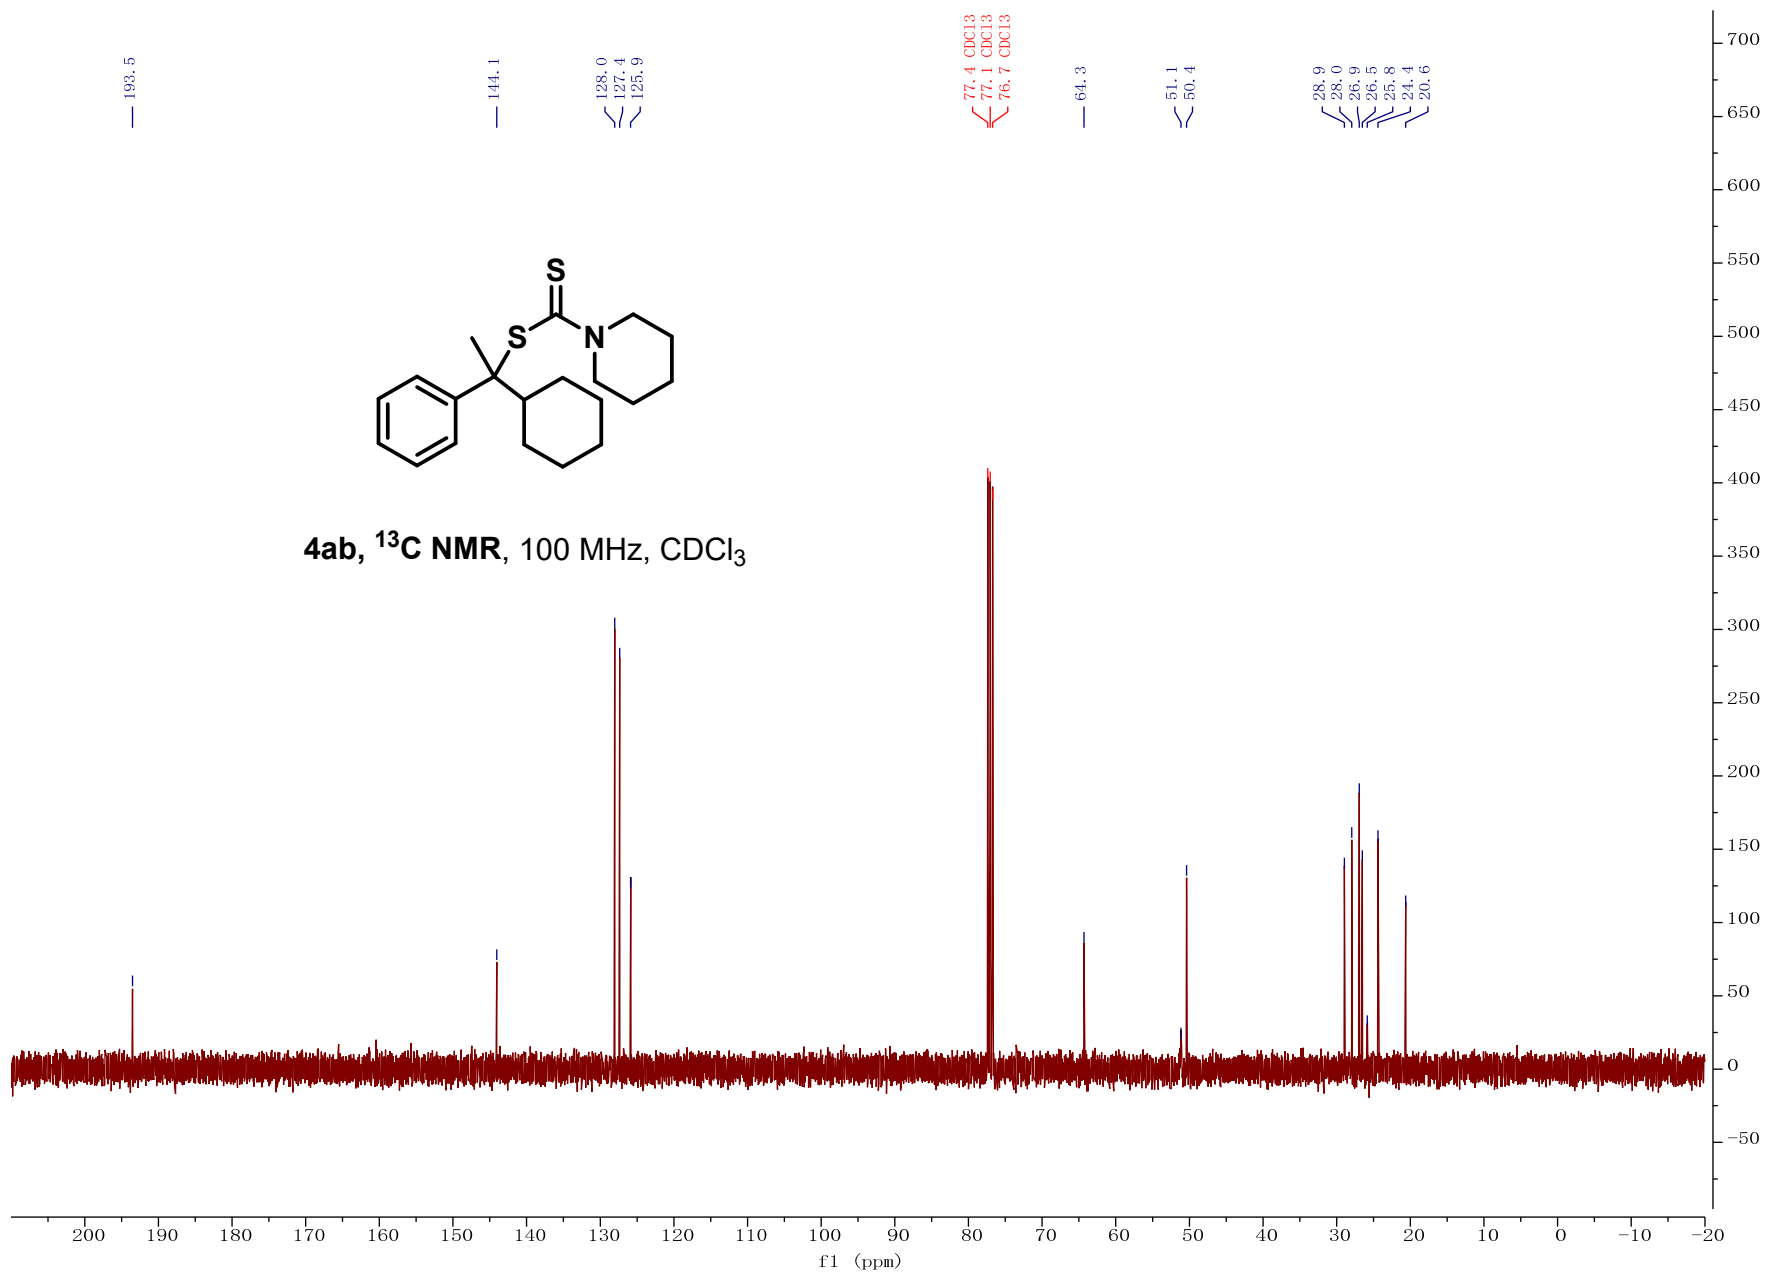

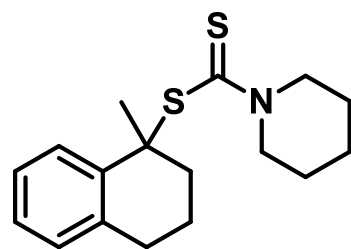

**4ac**,  $^1\text{H}$  NMR, 400 MHz,  $\text{CDCl}_3$

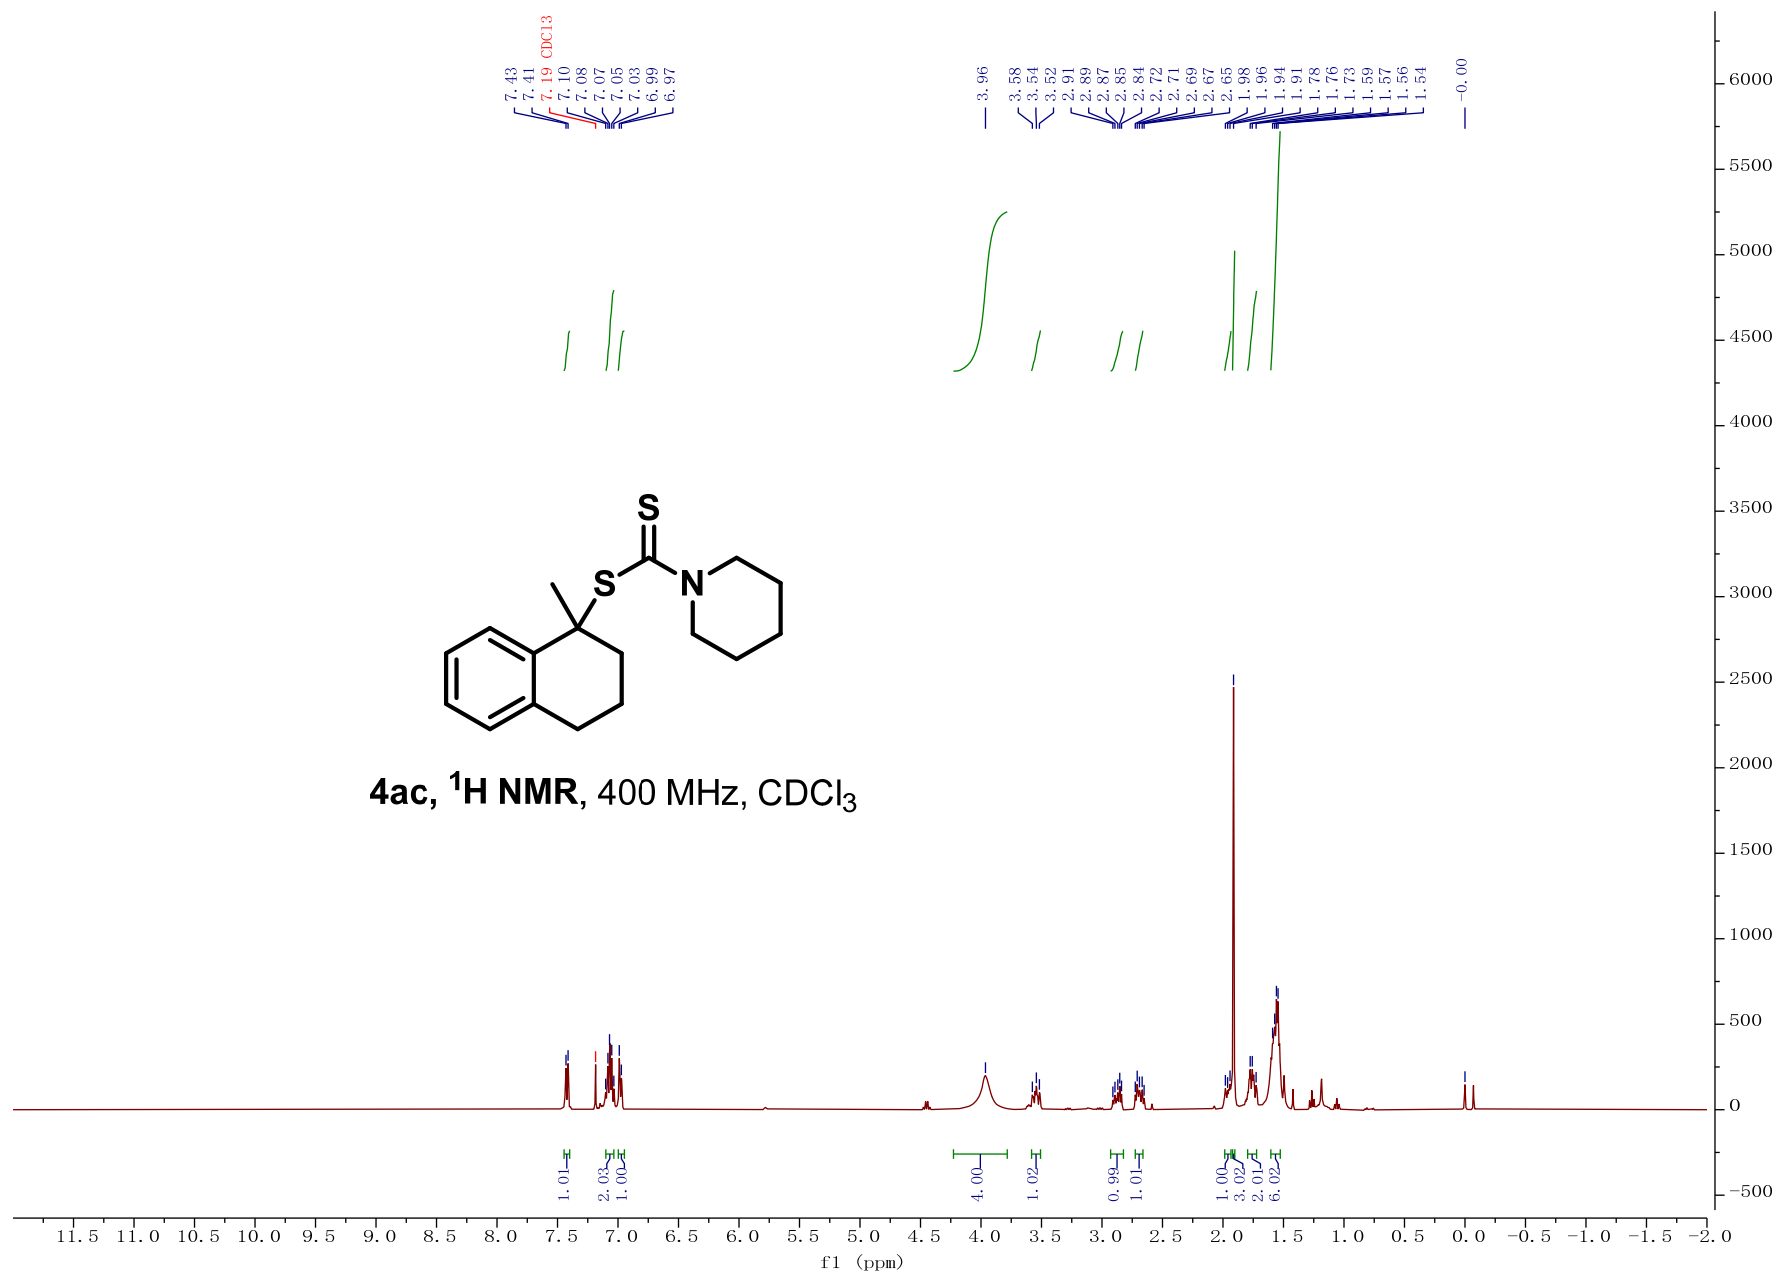

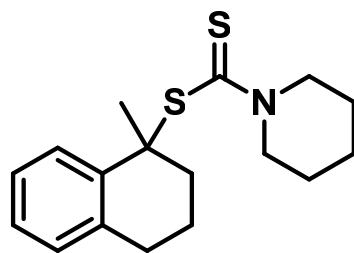

**4ac,  $^{13}\text{C}$  NMR, 100 MHz,  $\text{CDCl}_3$**

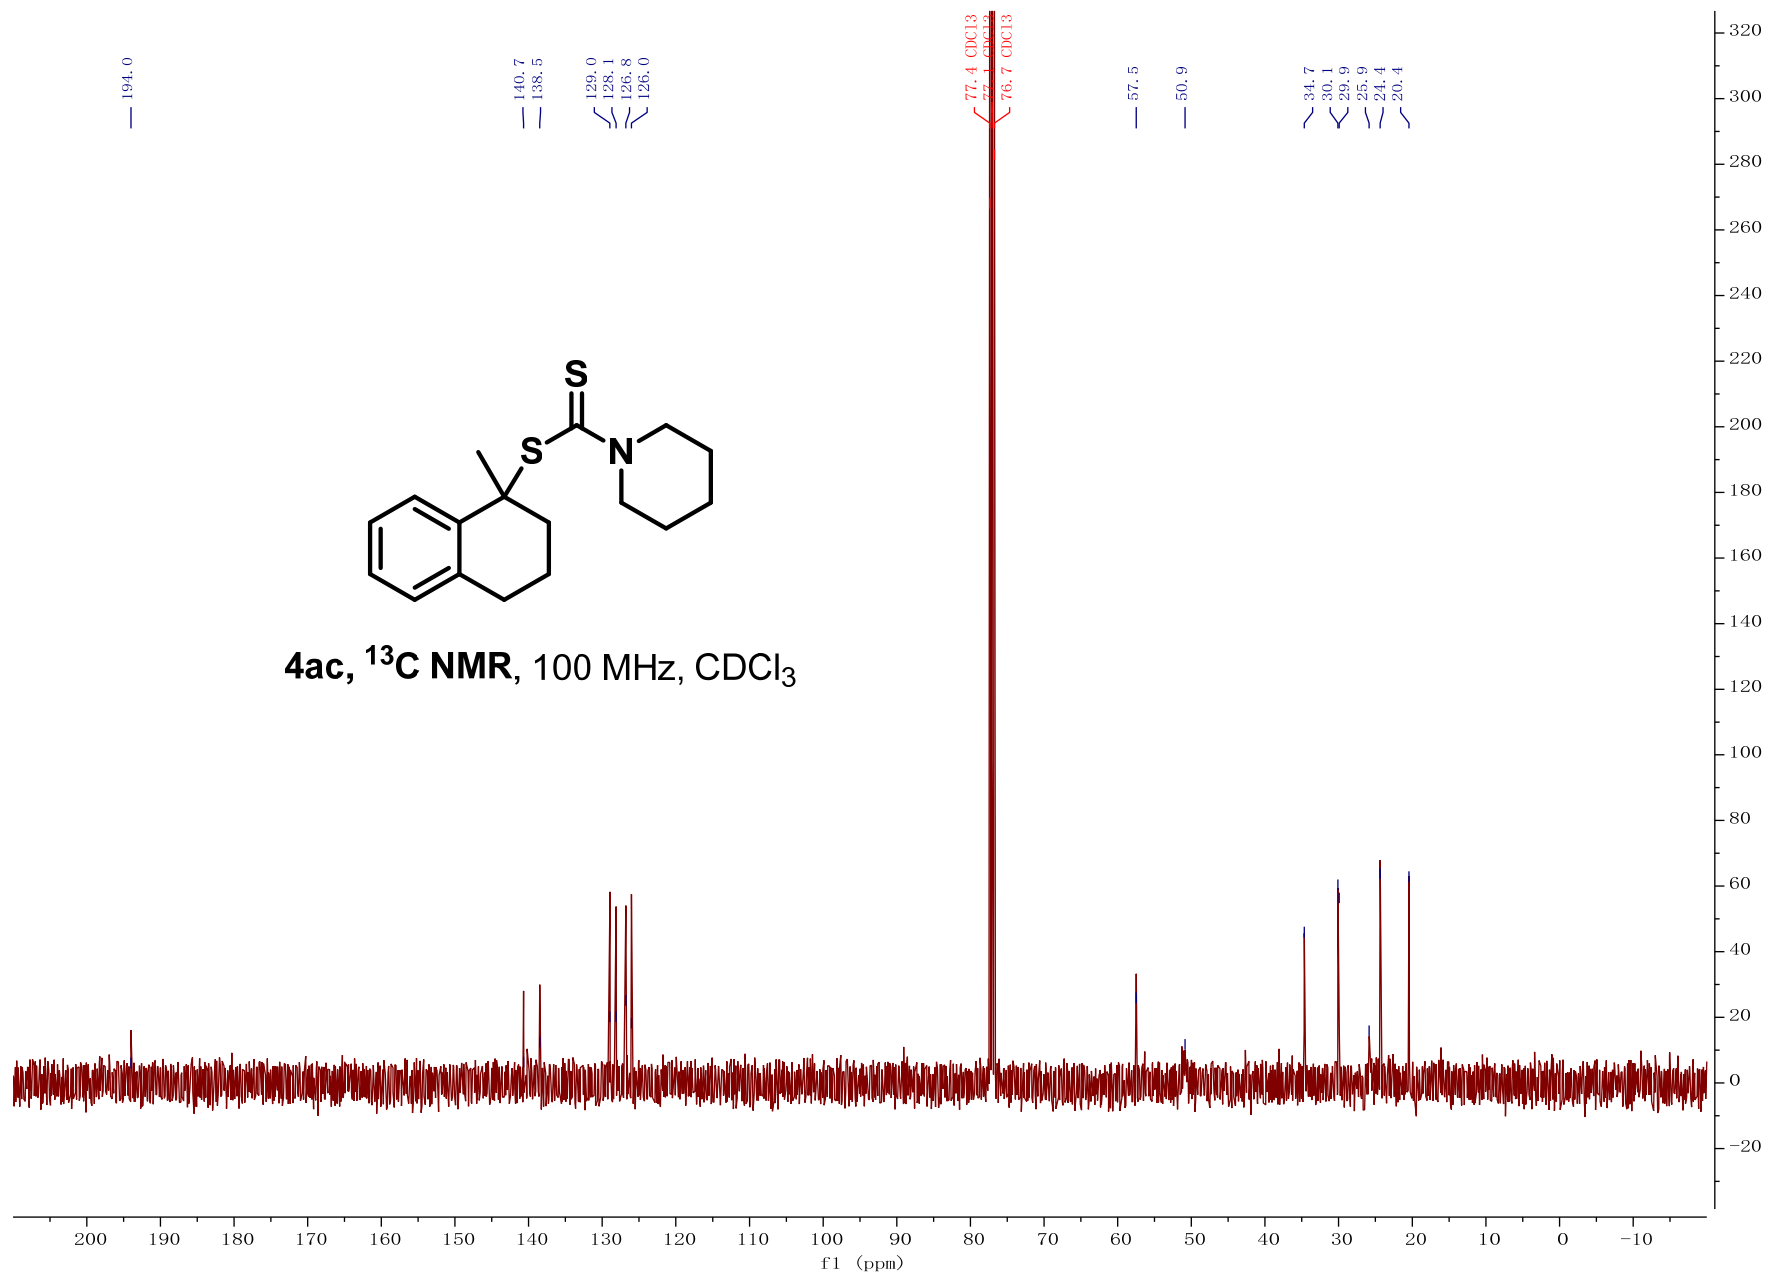

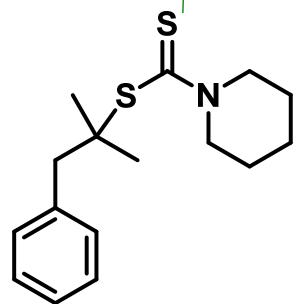

**4ad,  $^1\text{H}$  NMR, 400 MHz,  $\text{CDCl}_3$**

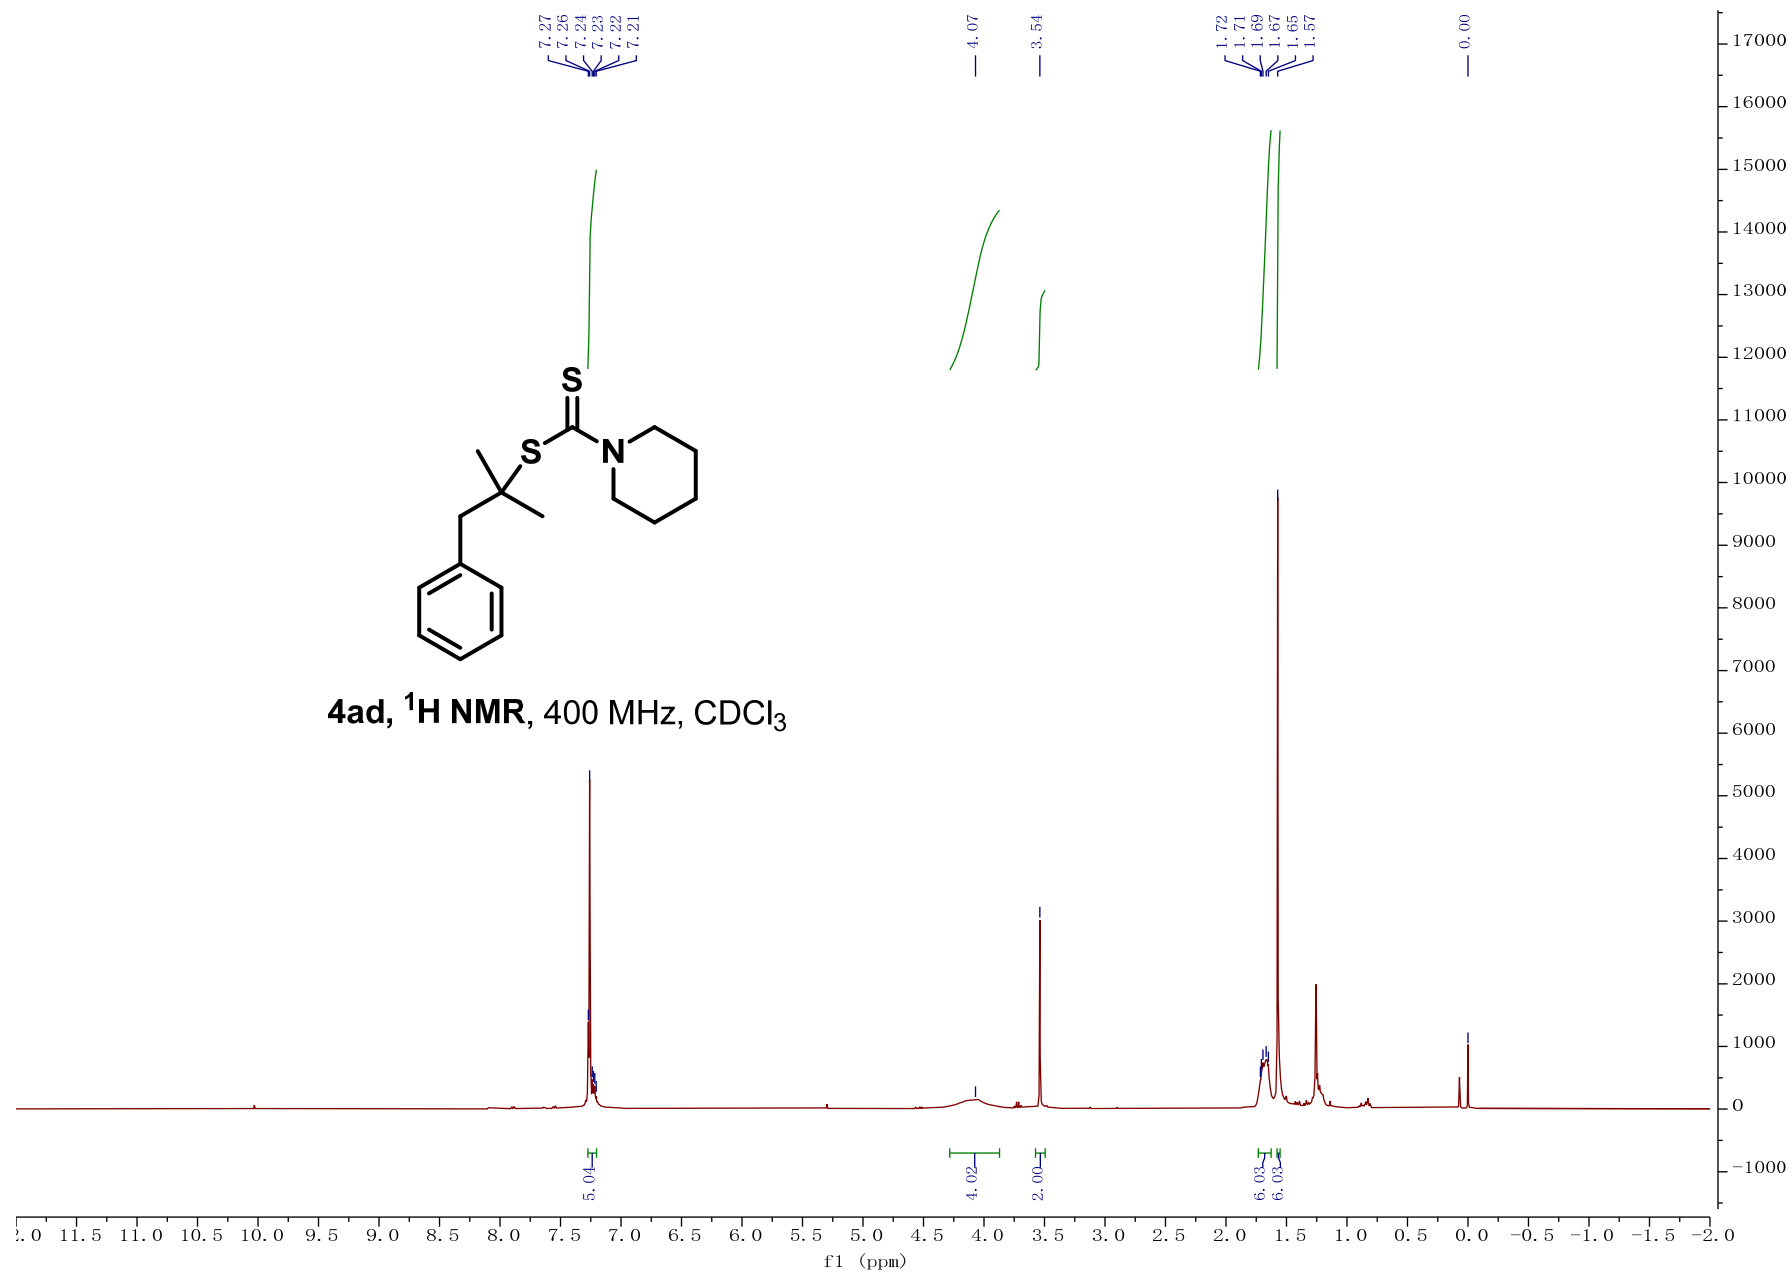

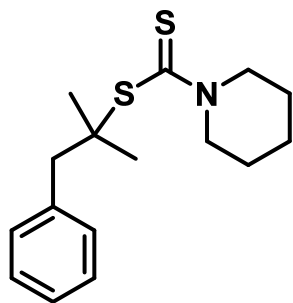

4ad,  $^{13}\text{C}$  NMR, 100 MHz,  $\text{CDCl}_3$

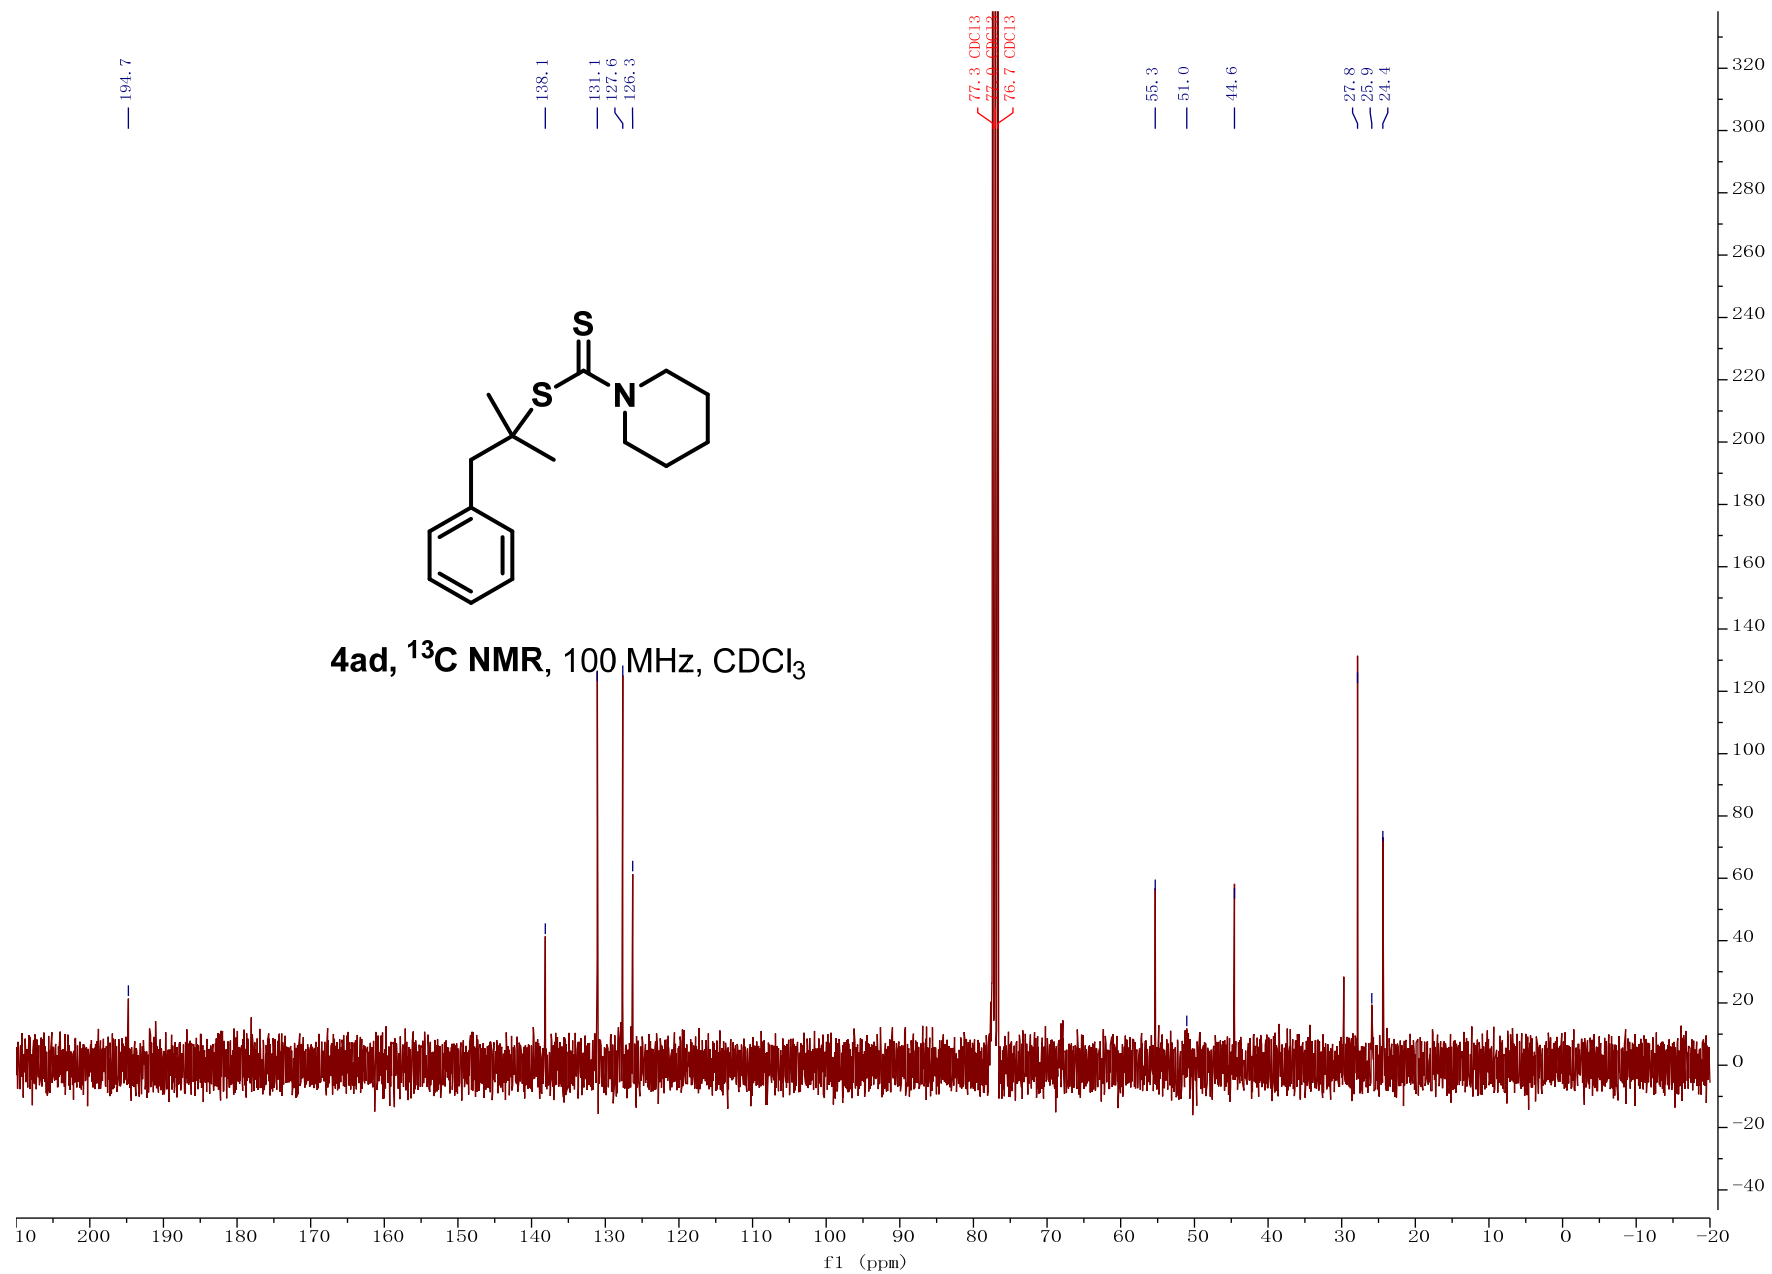

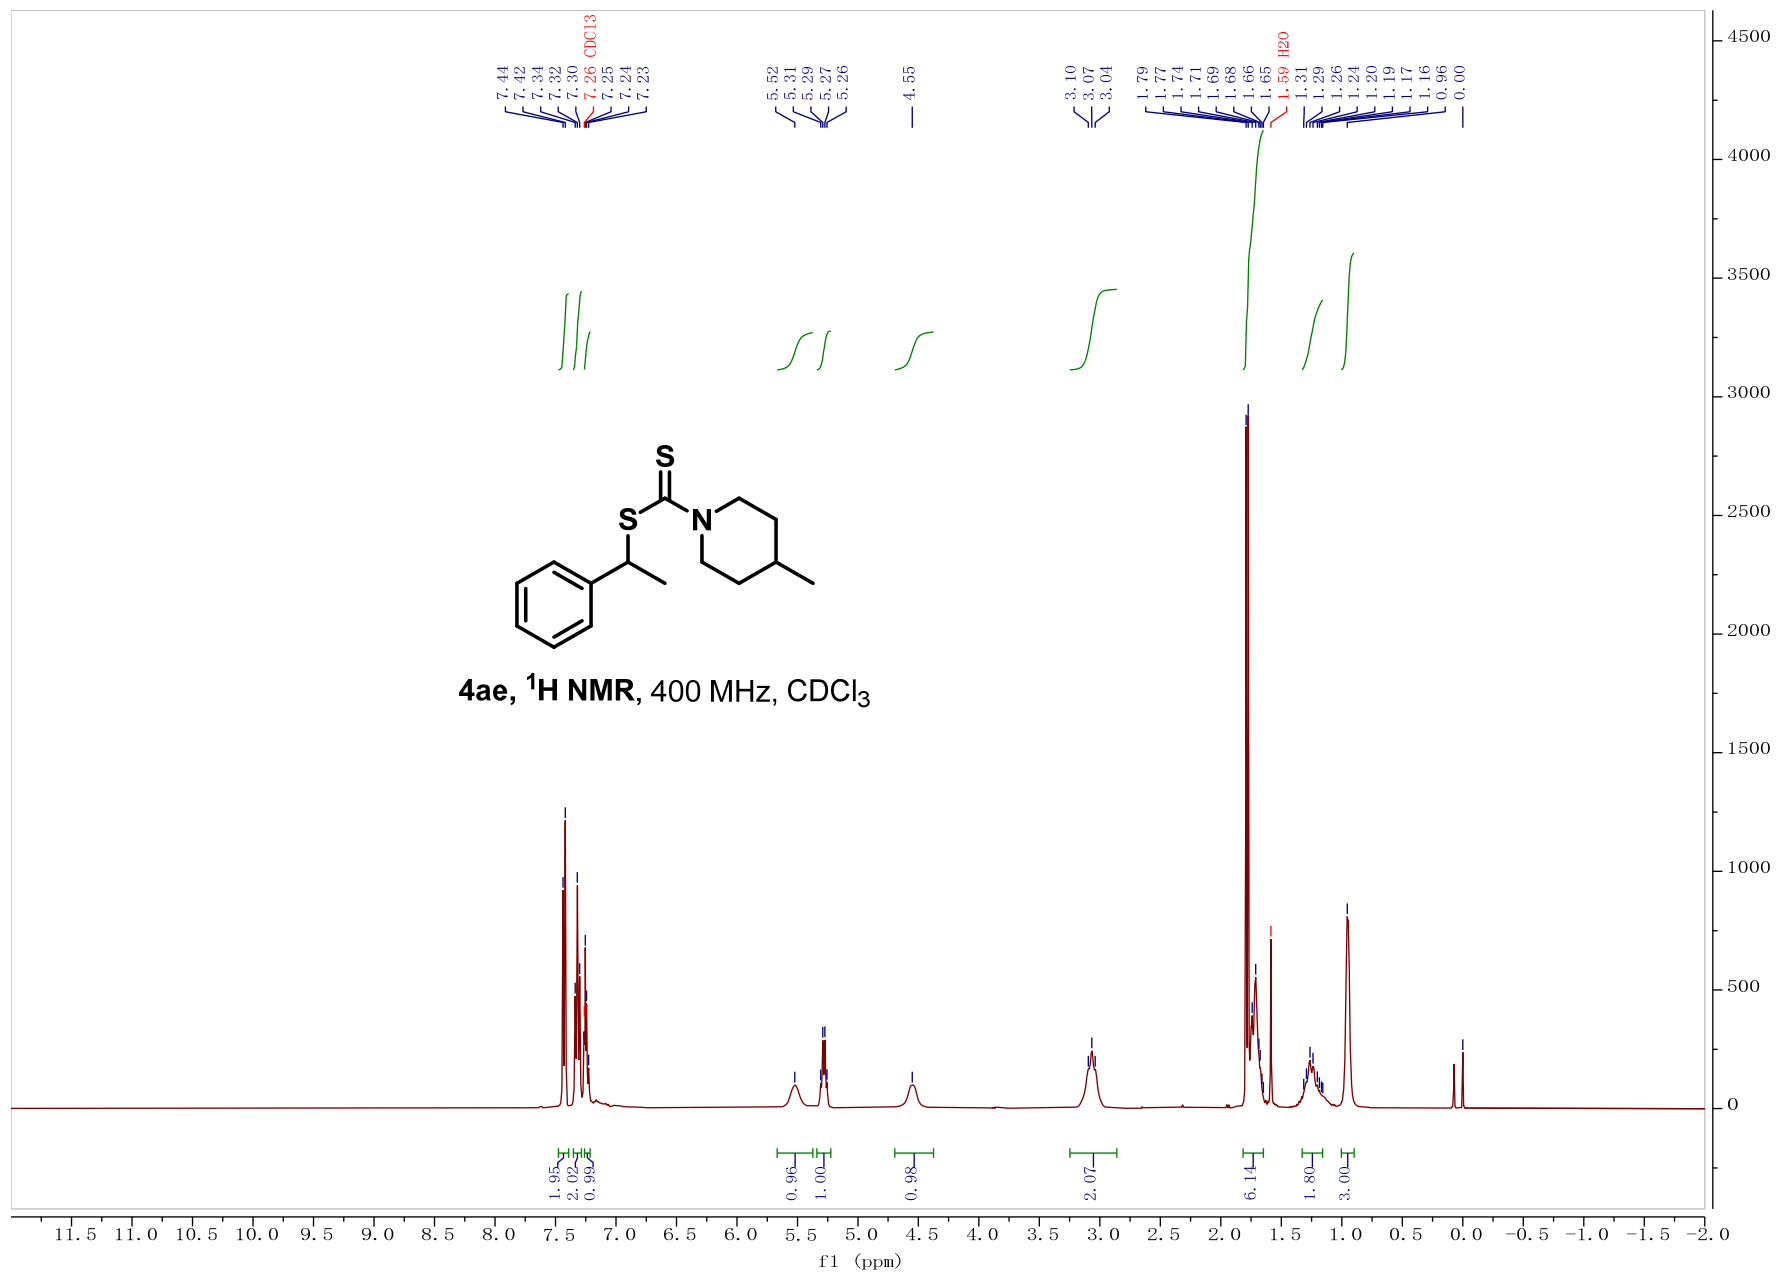

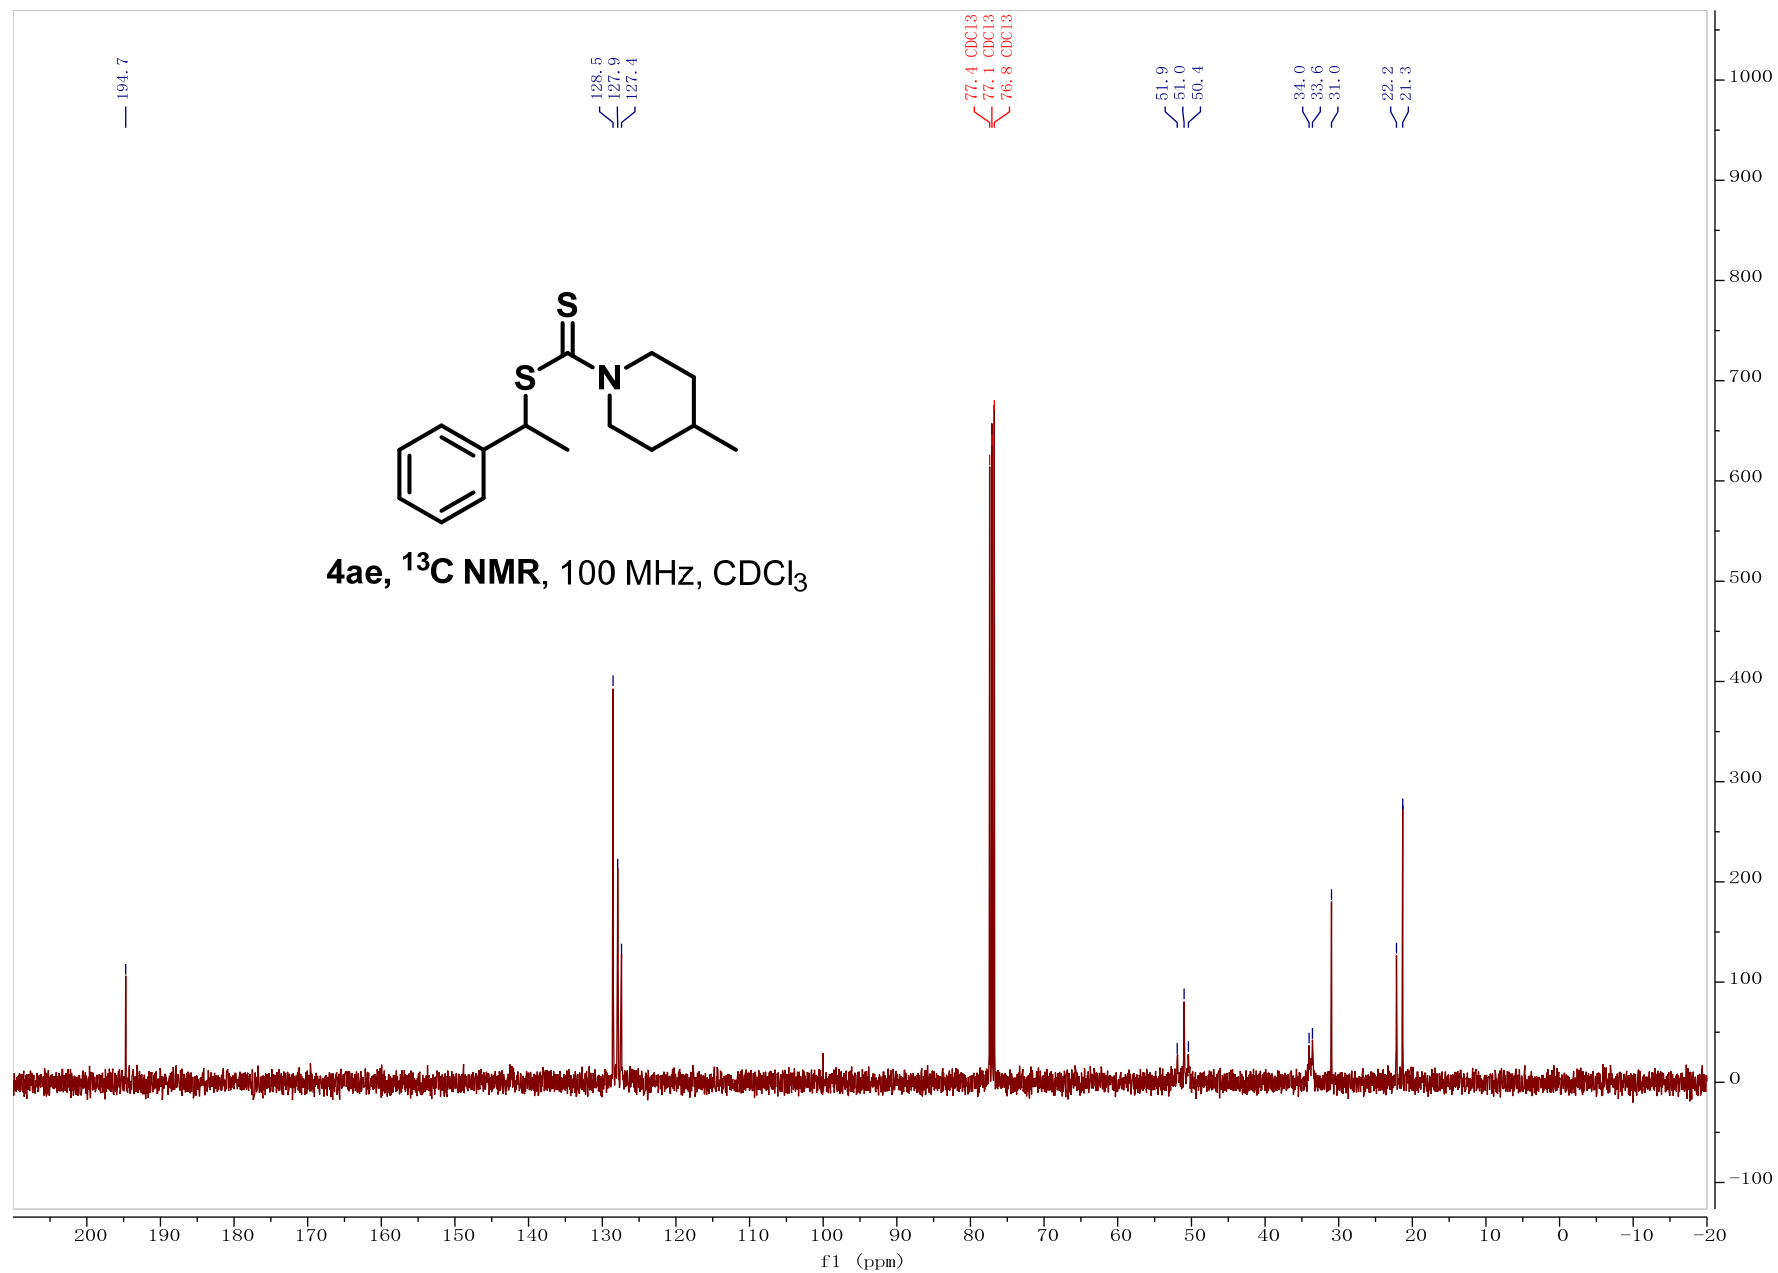

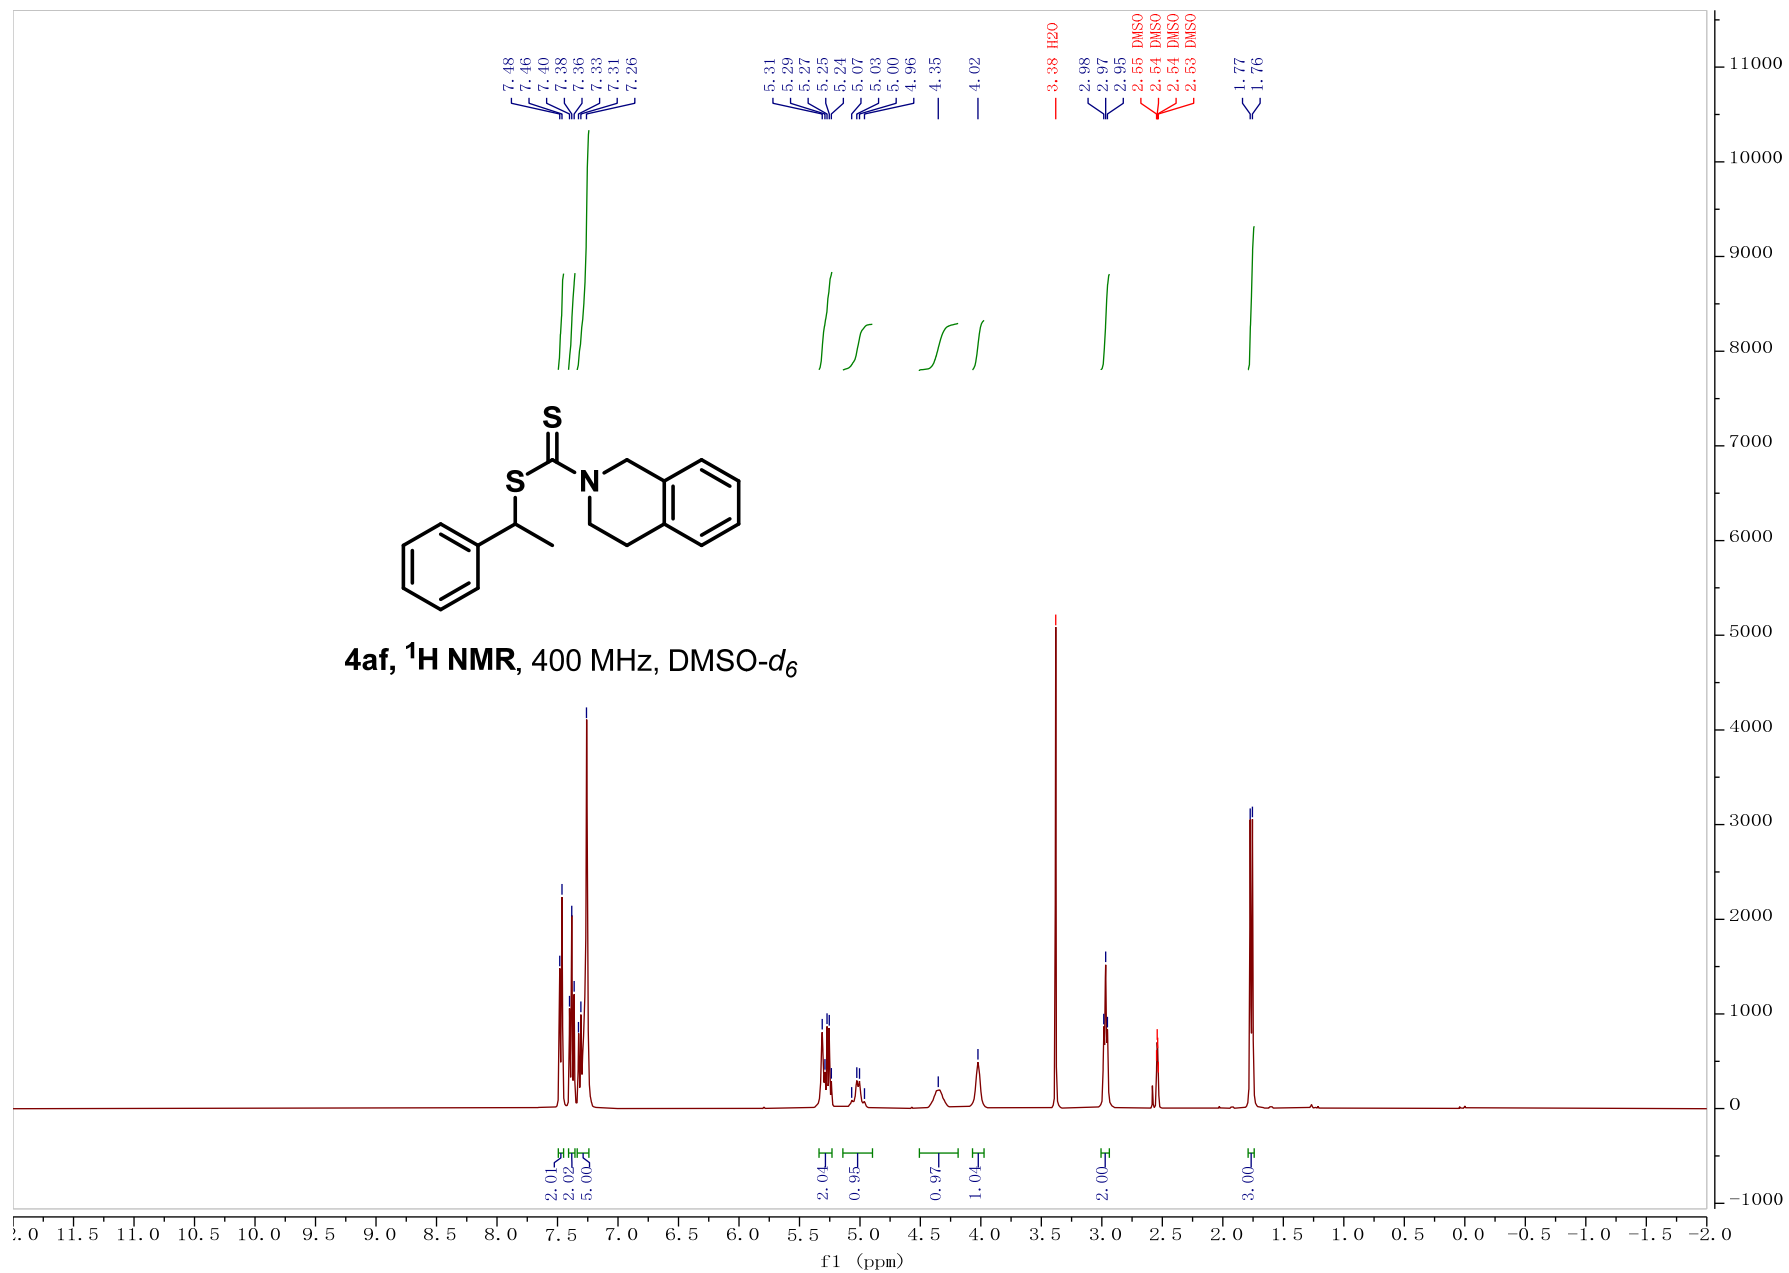

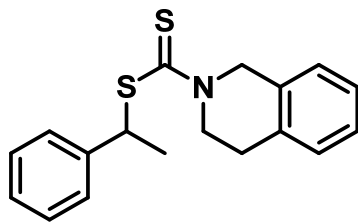

4af,  $^{13}\text{C}$  NMR, 100 MHz,  $\text{DMSO}-d_6$

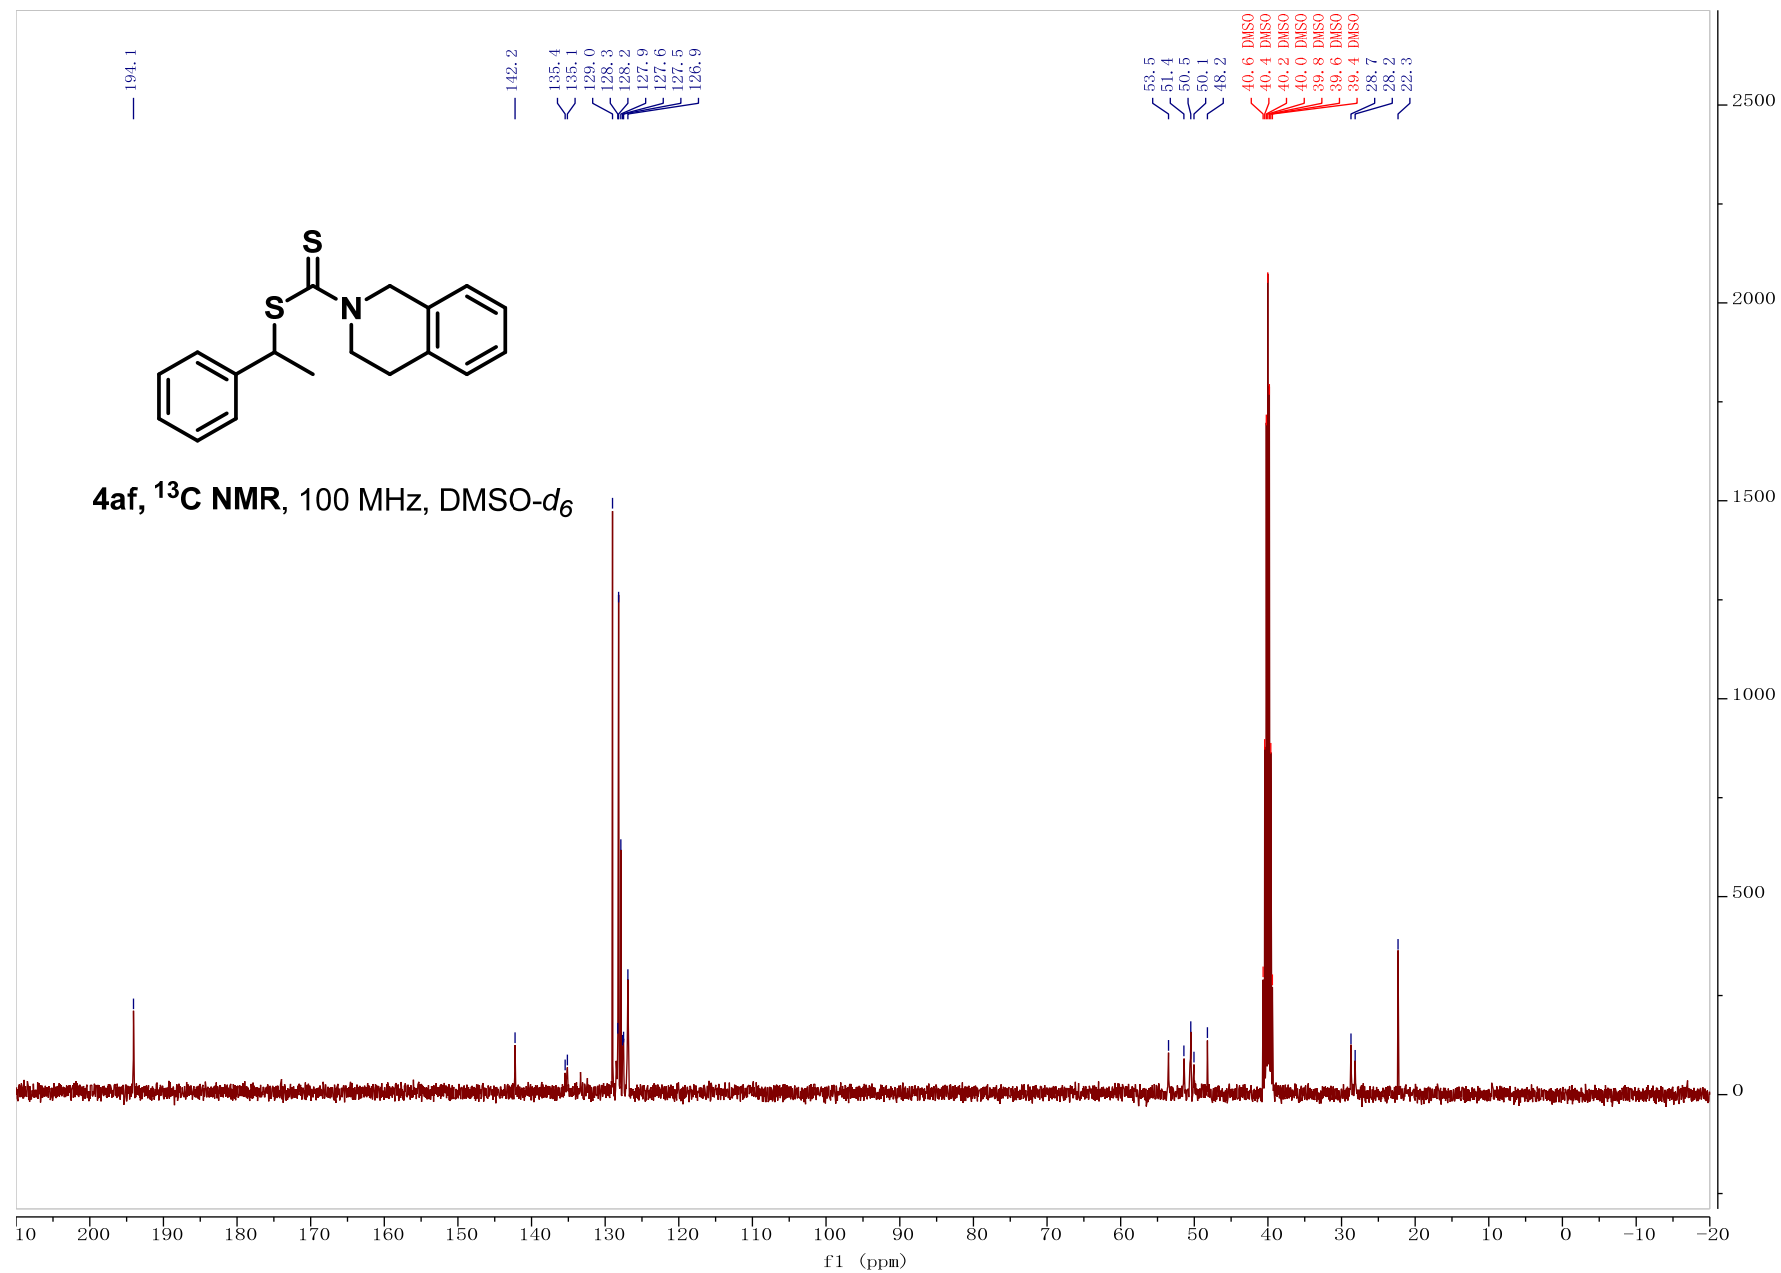

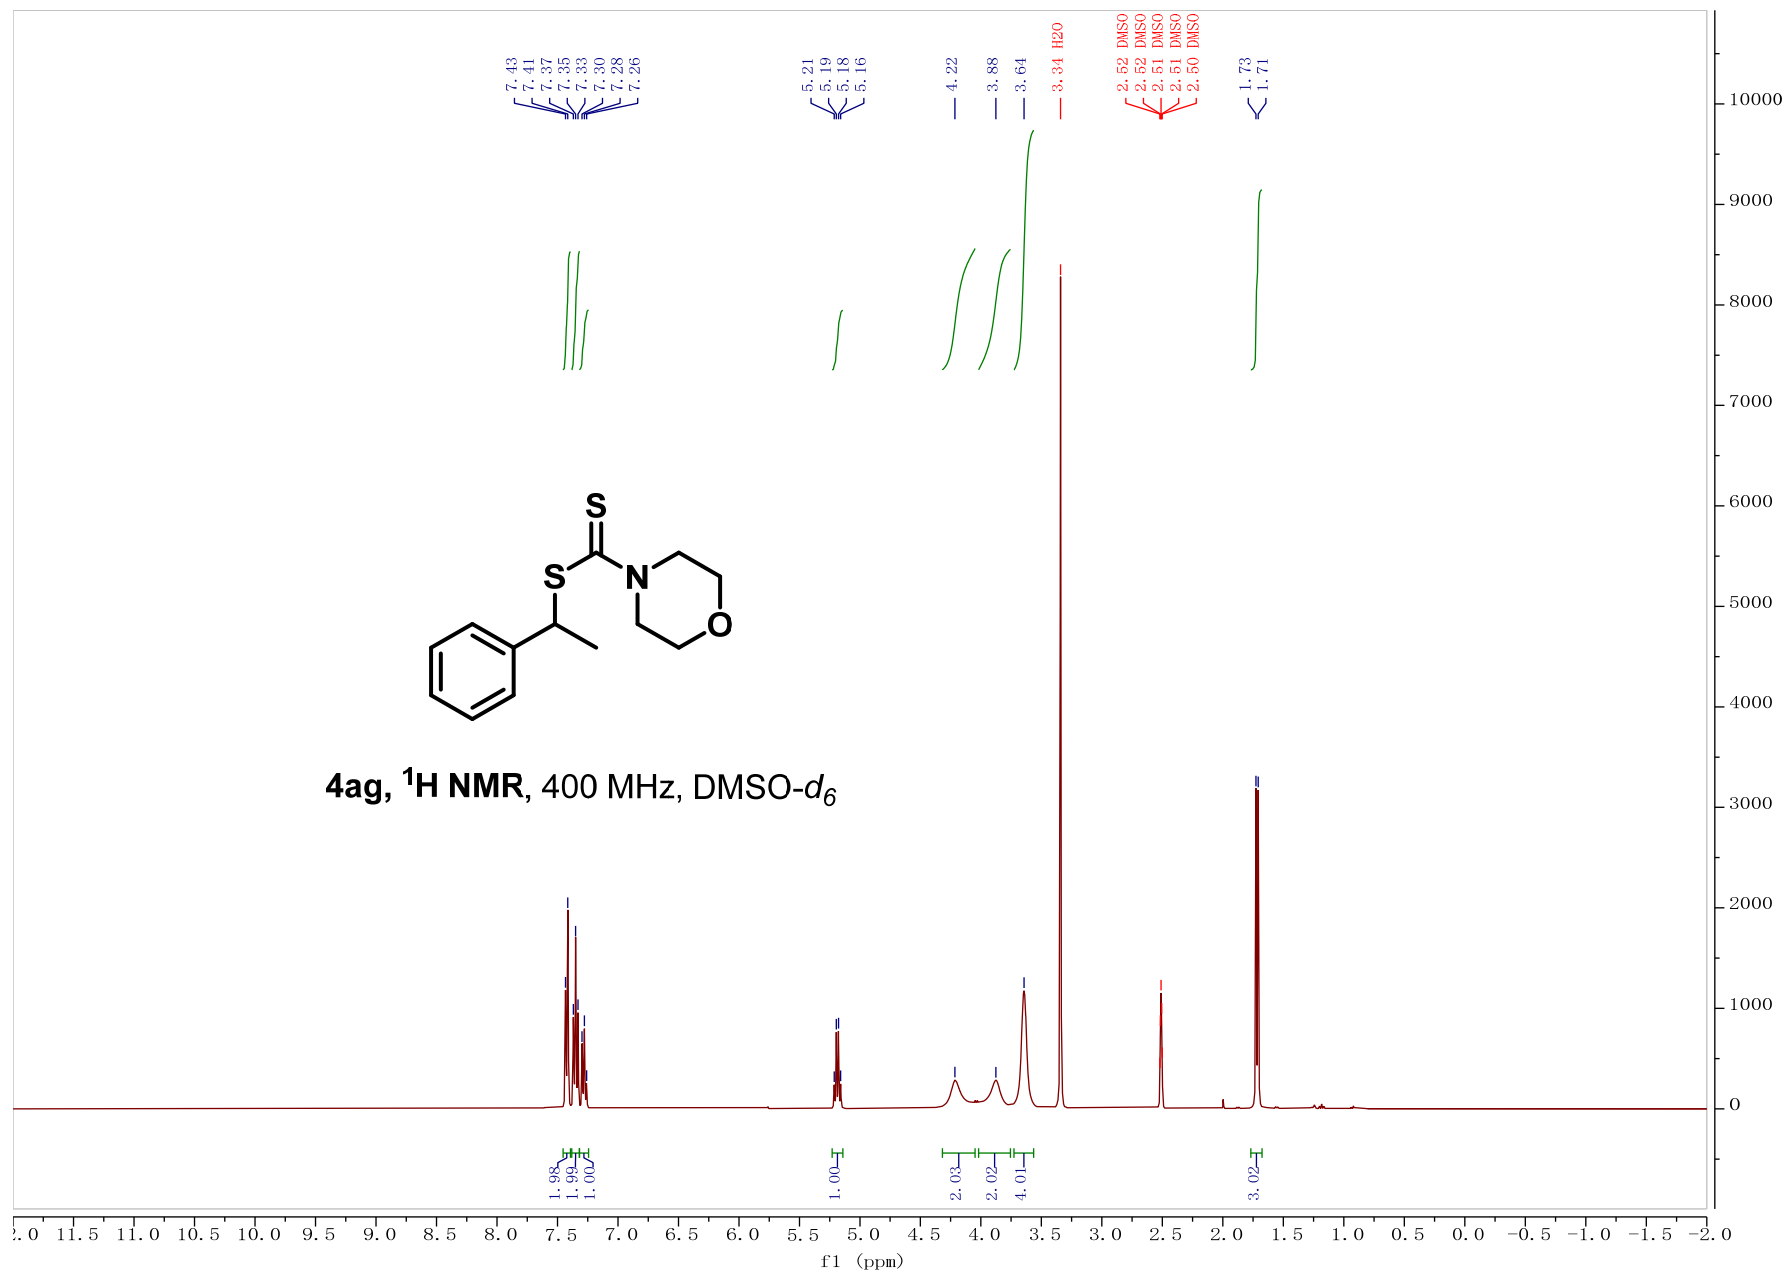

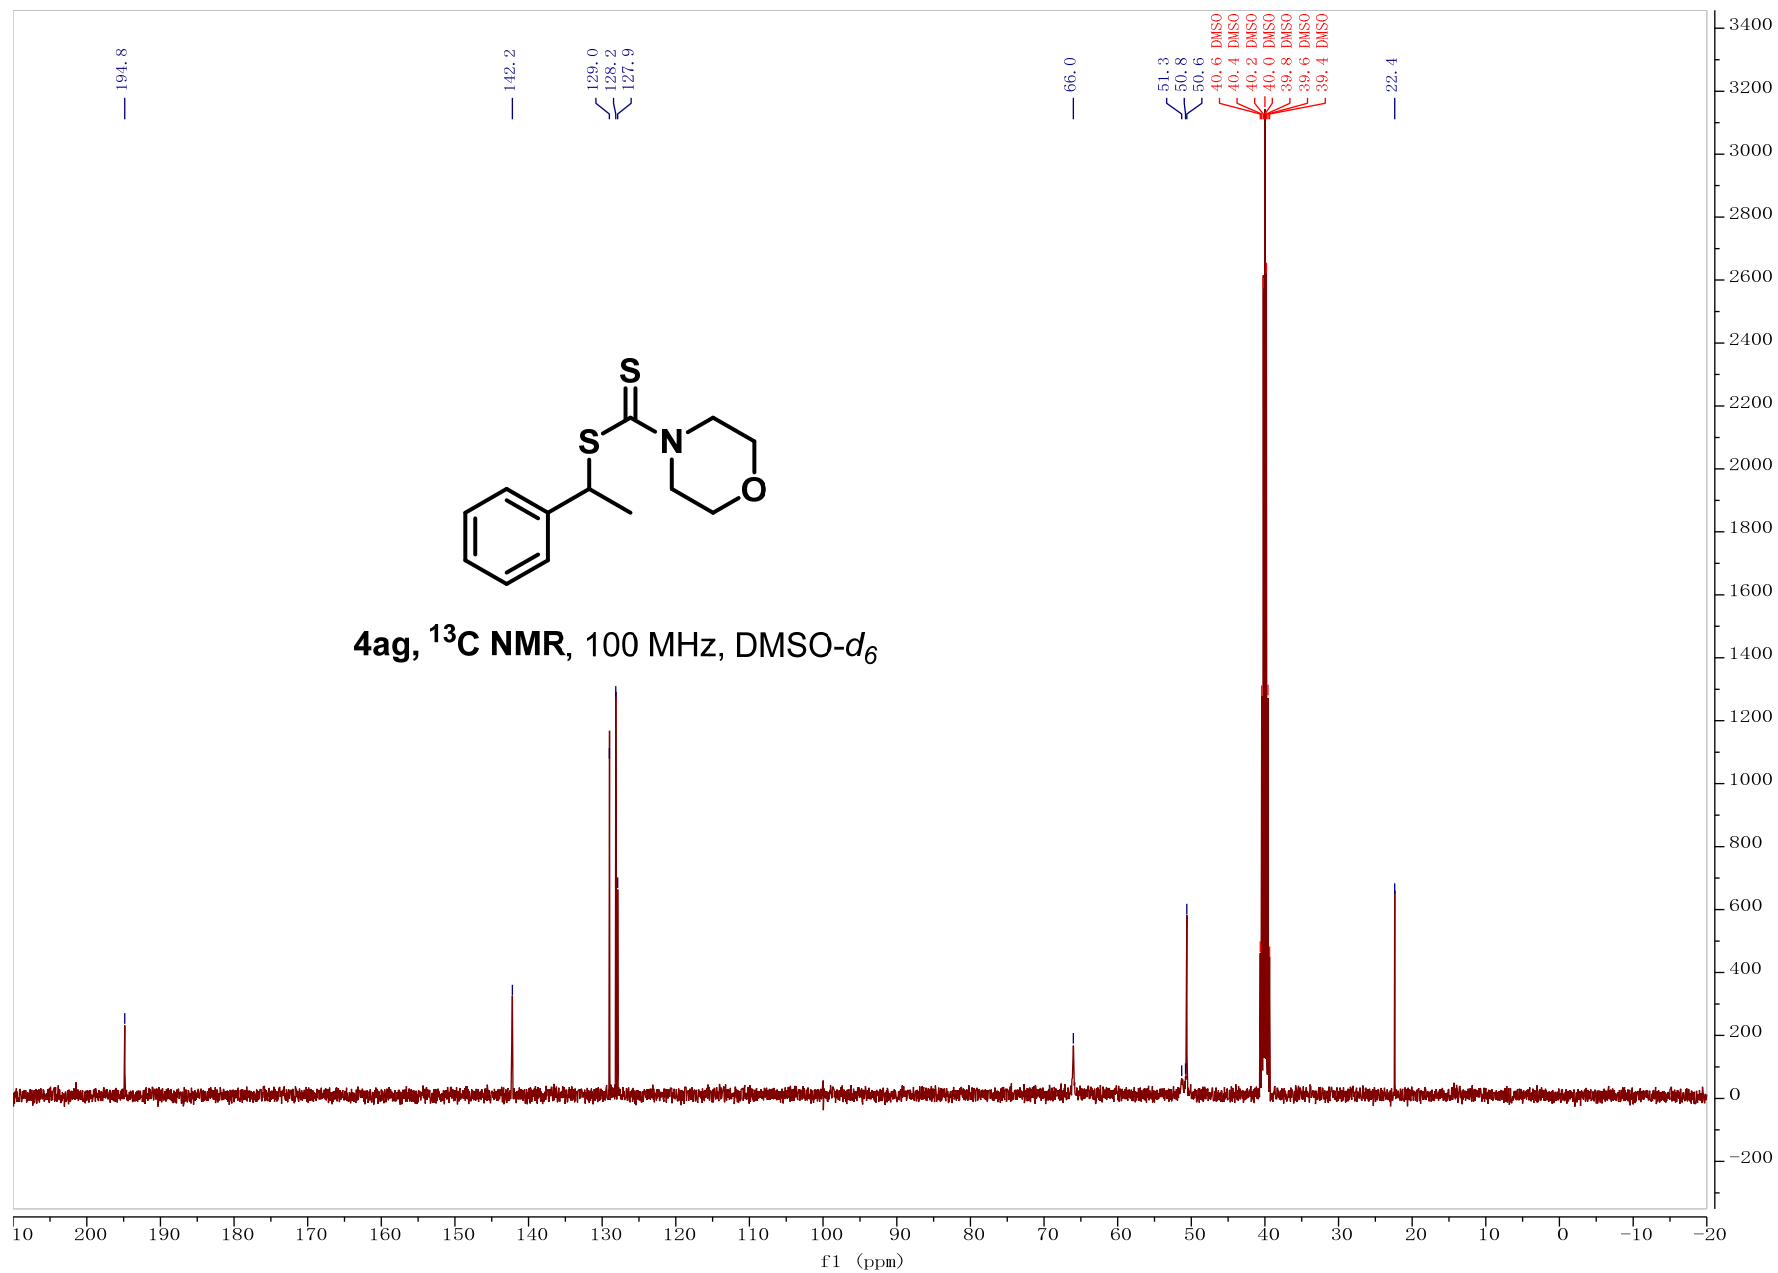

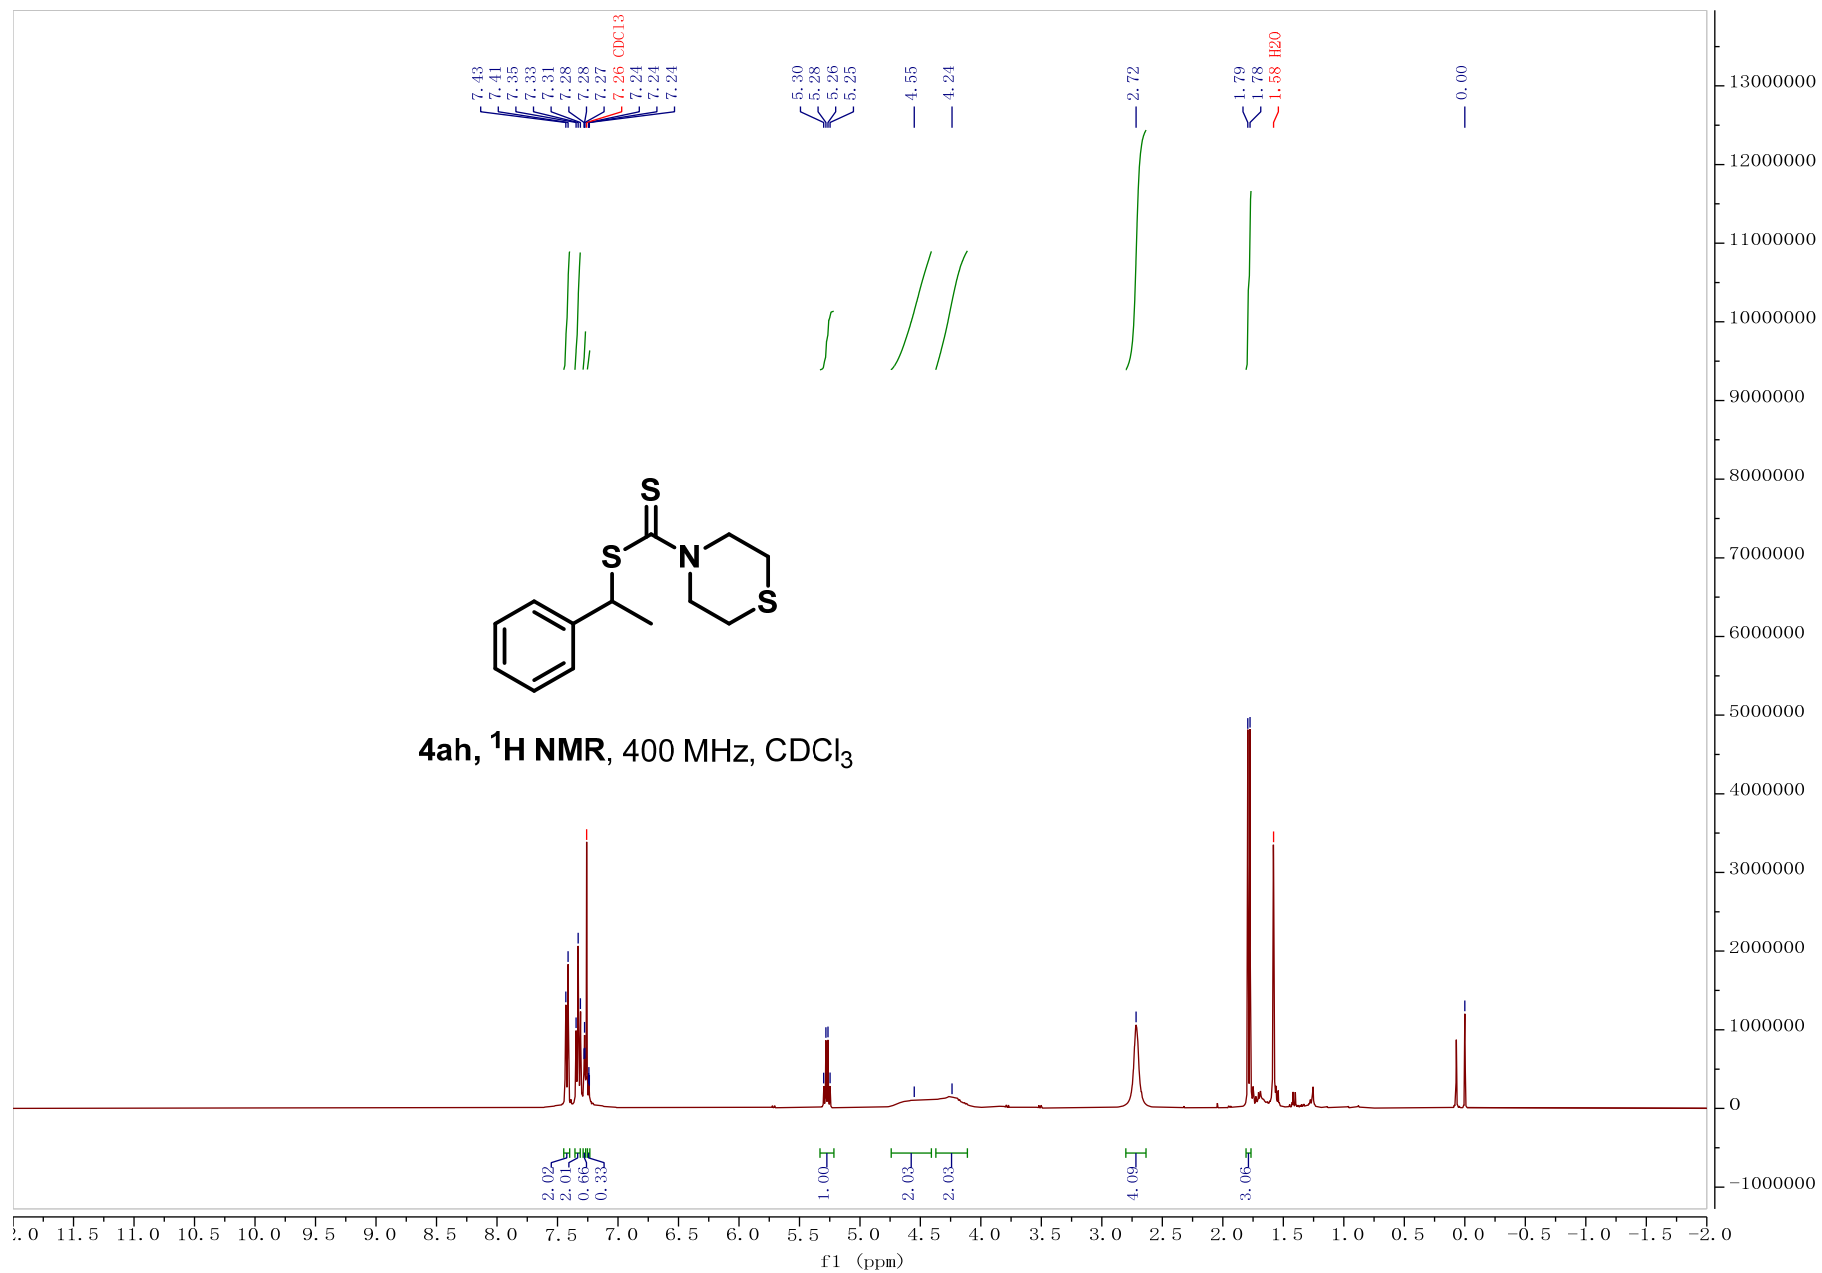

S103

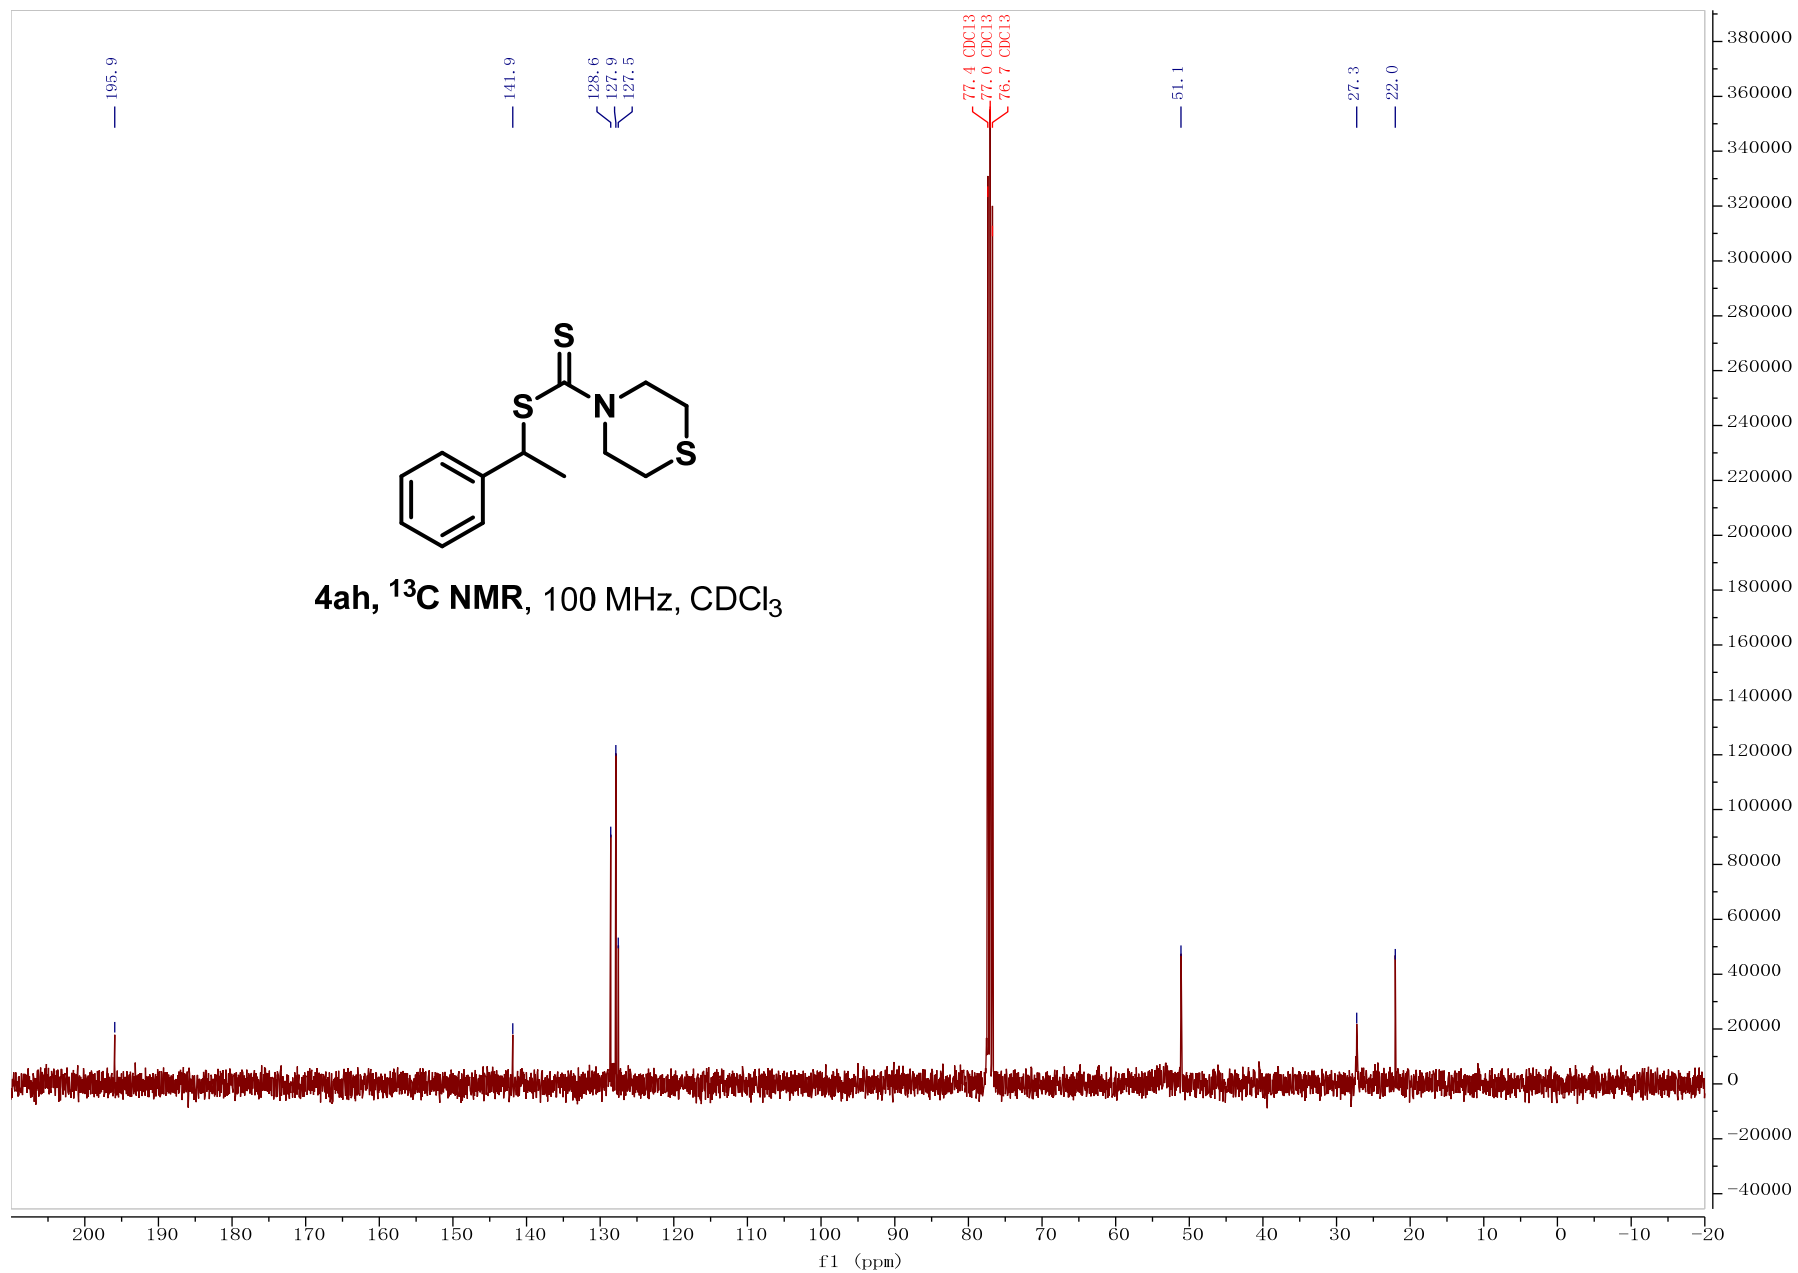

S104

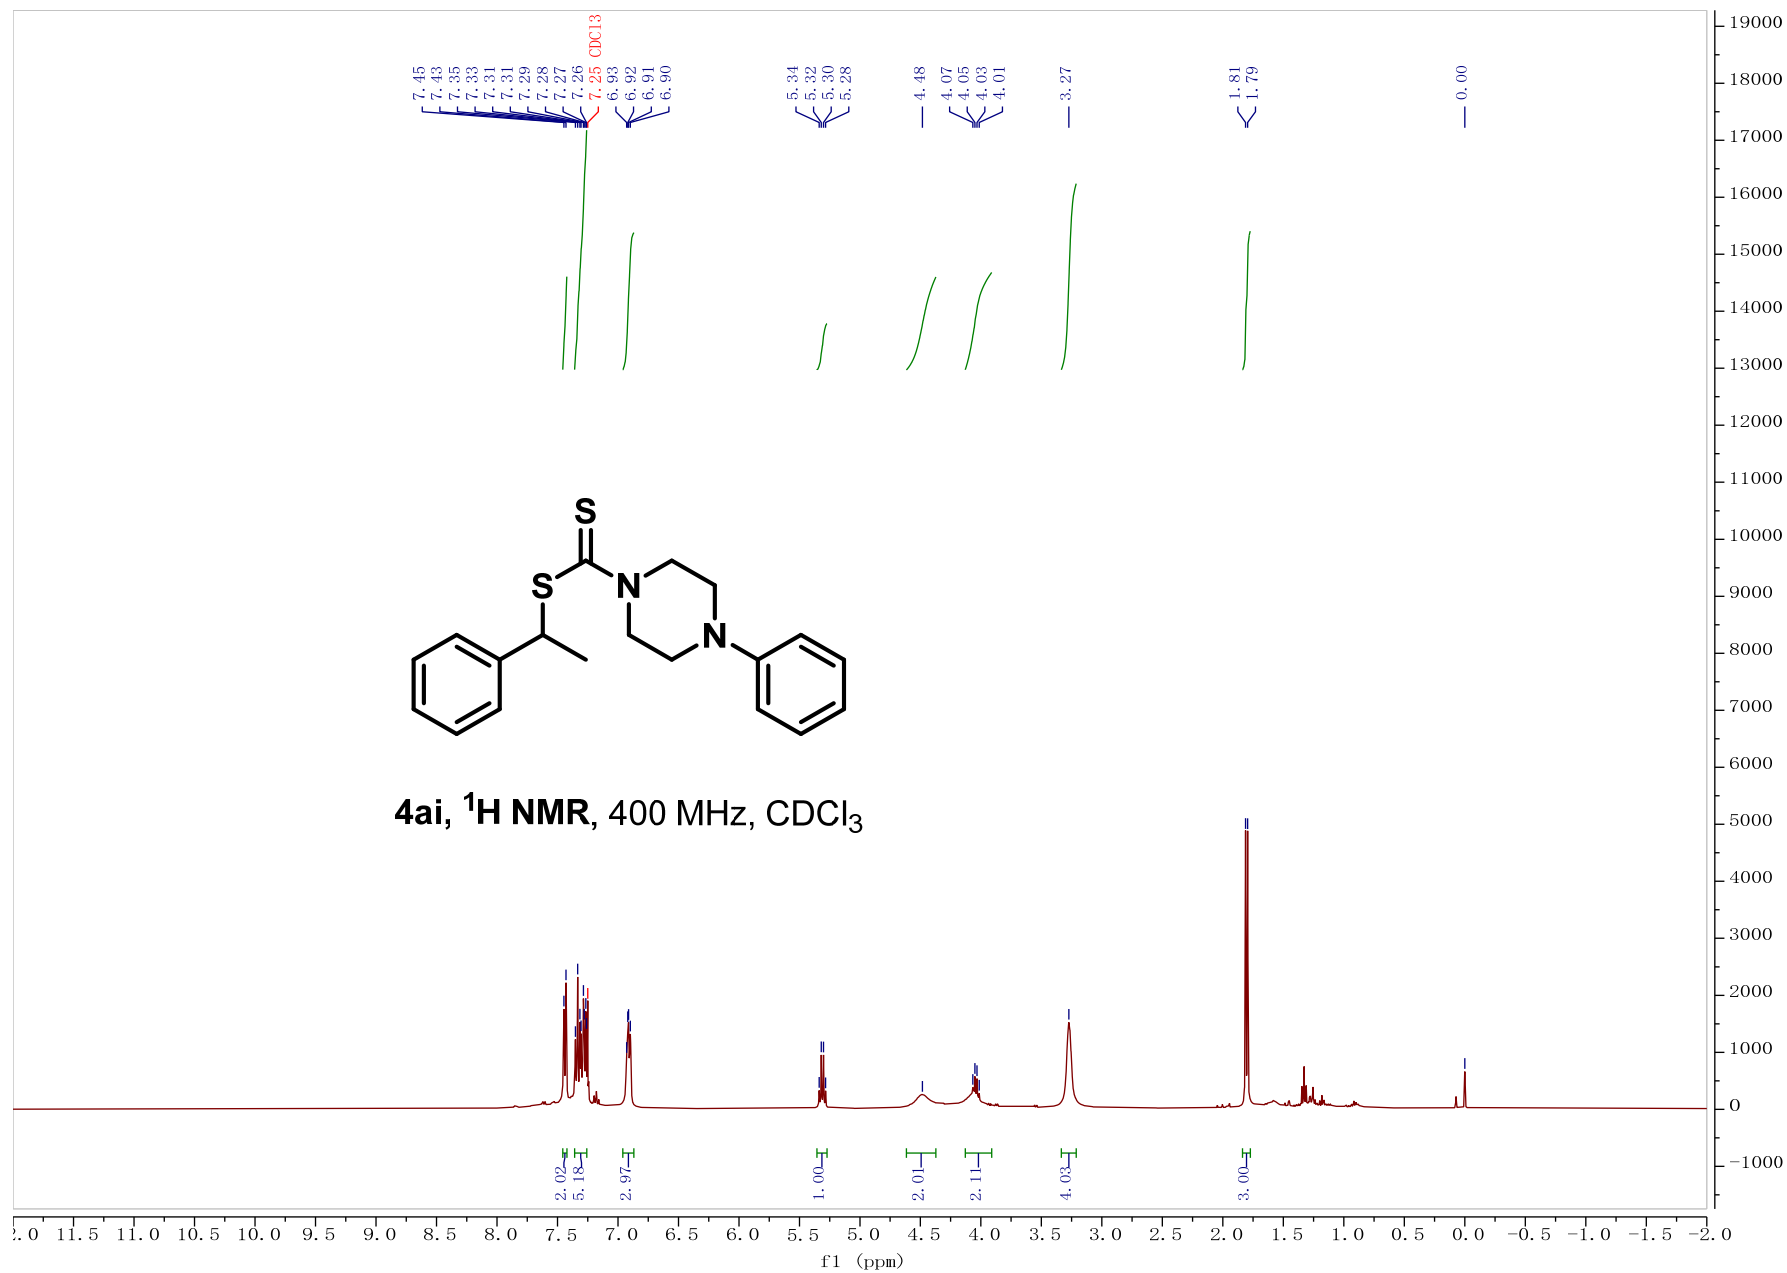

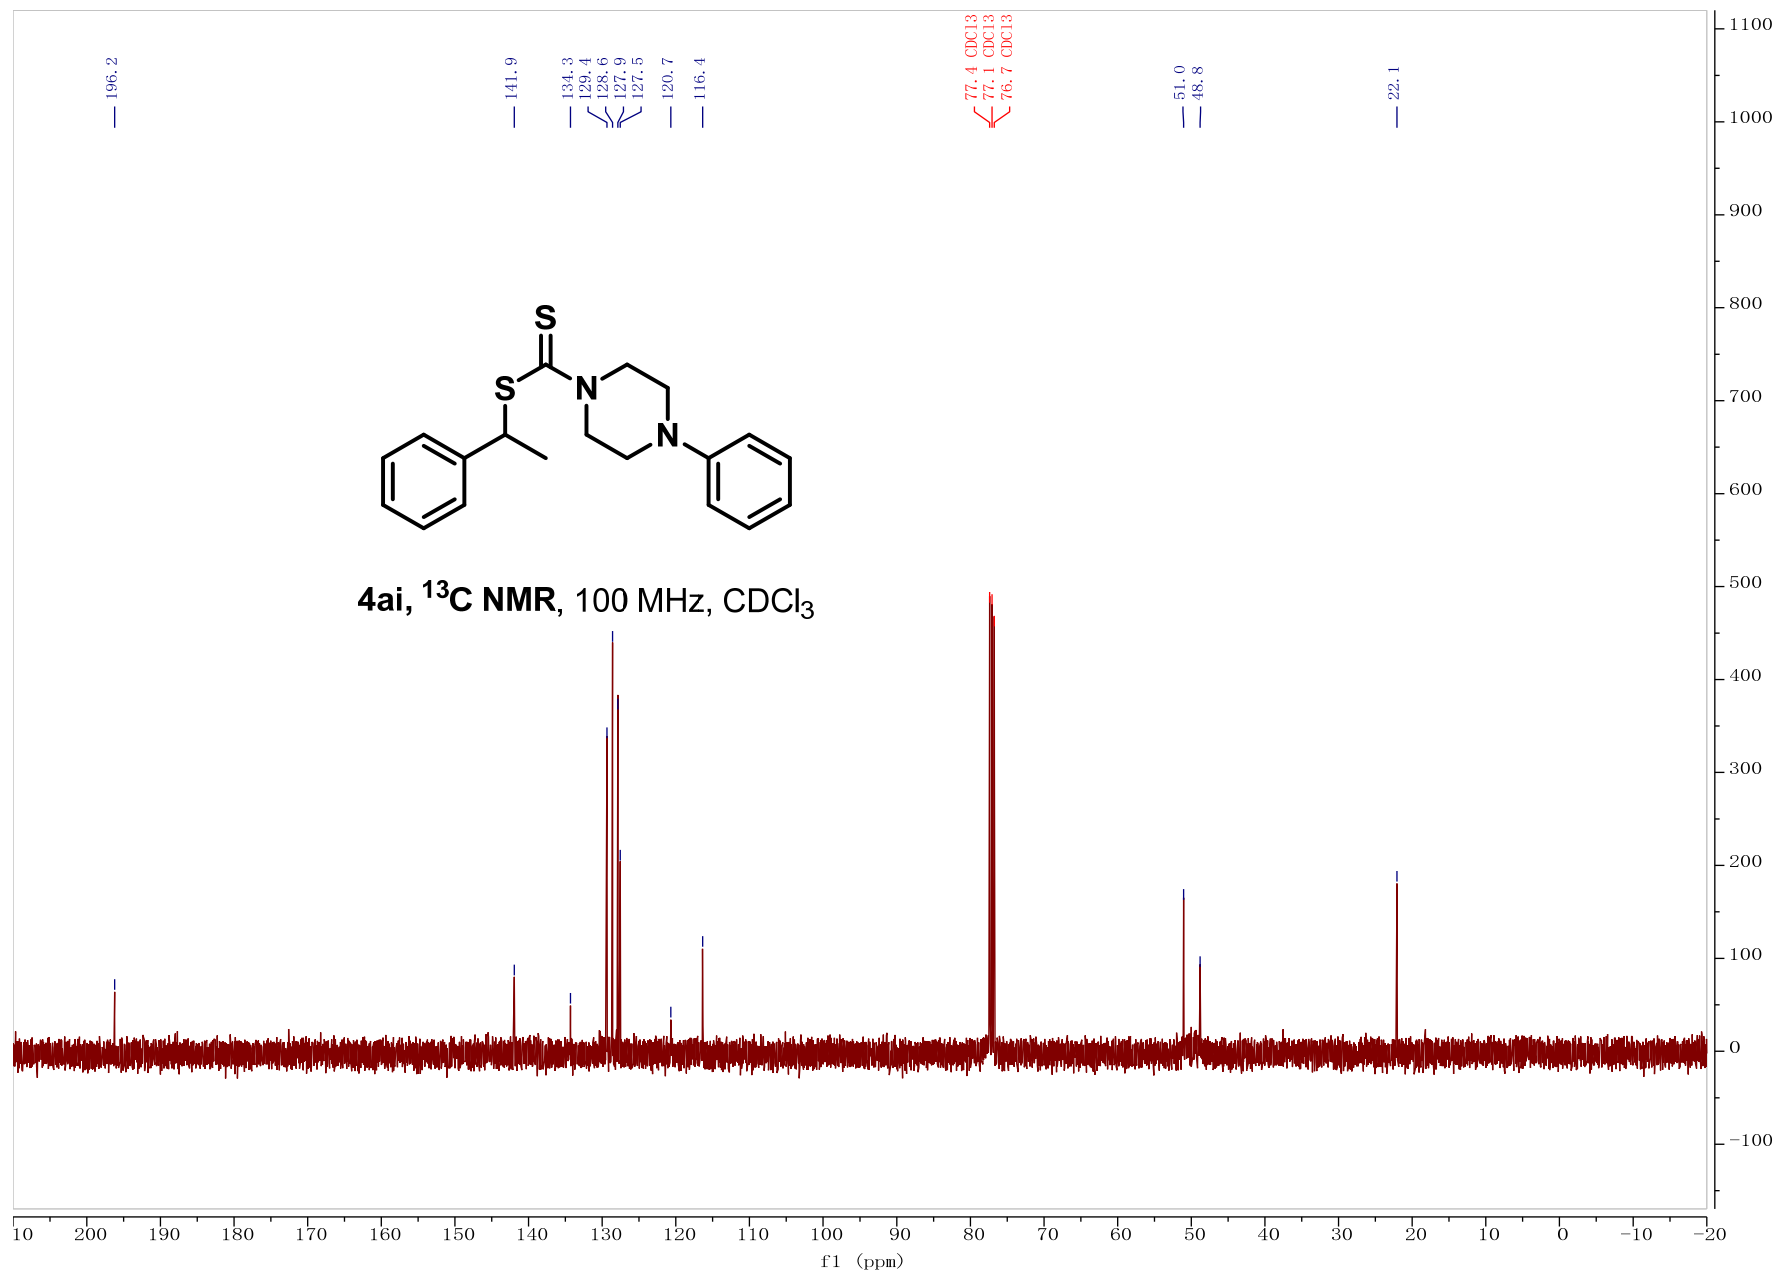

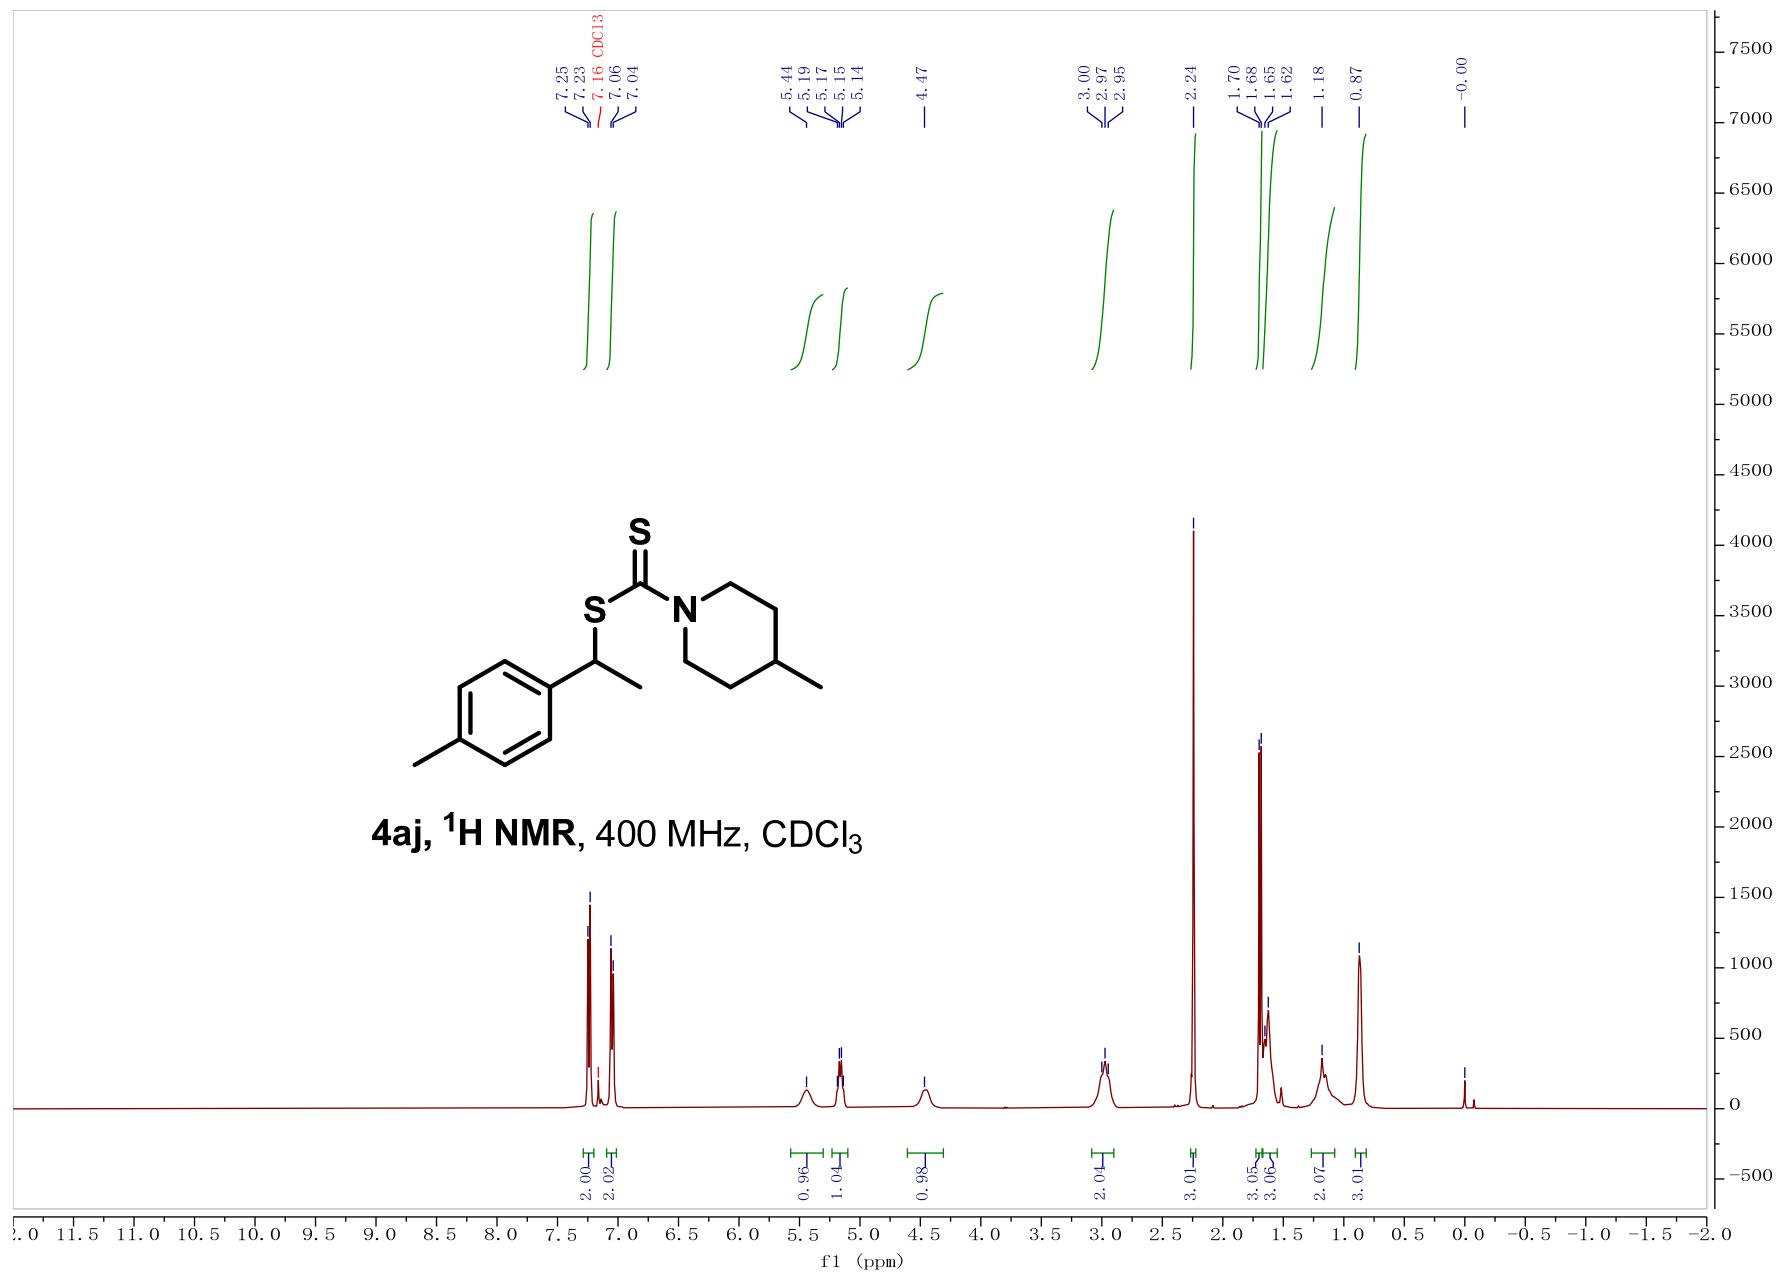

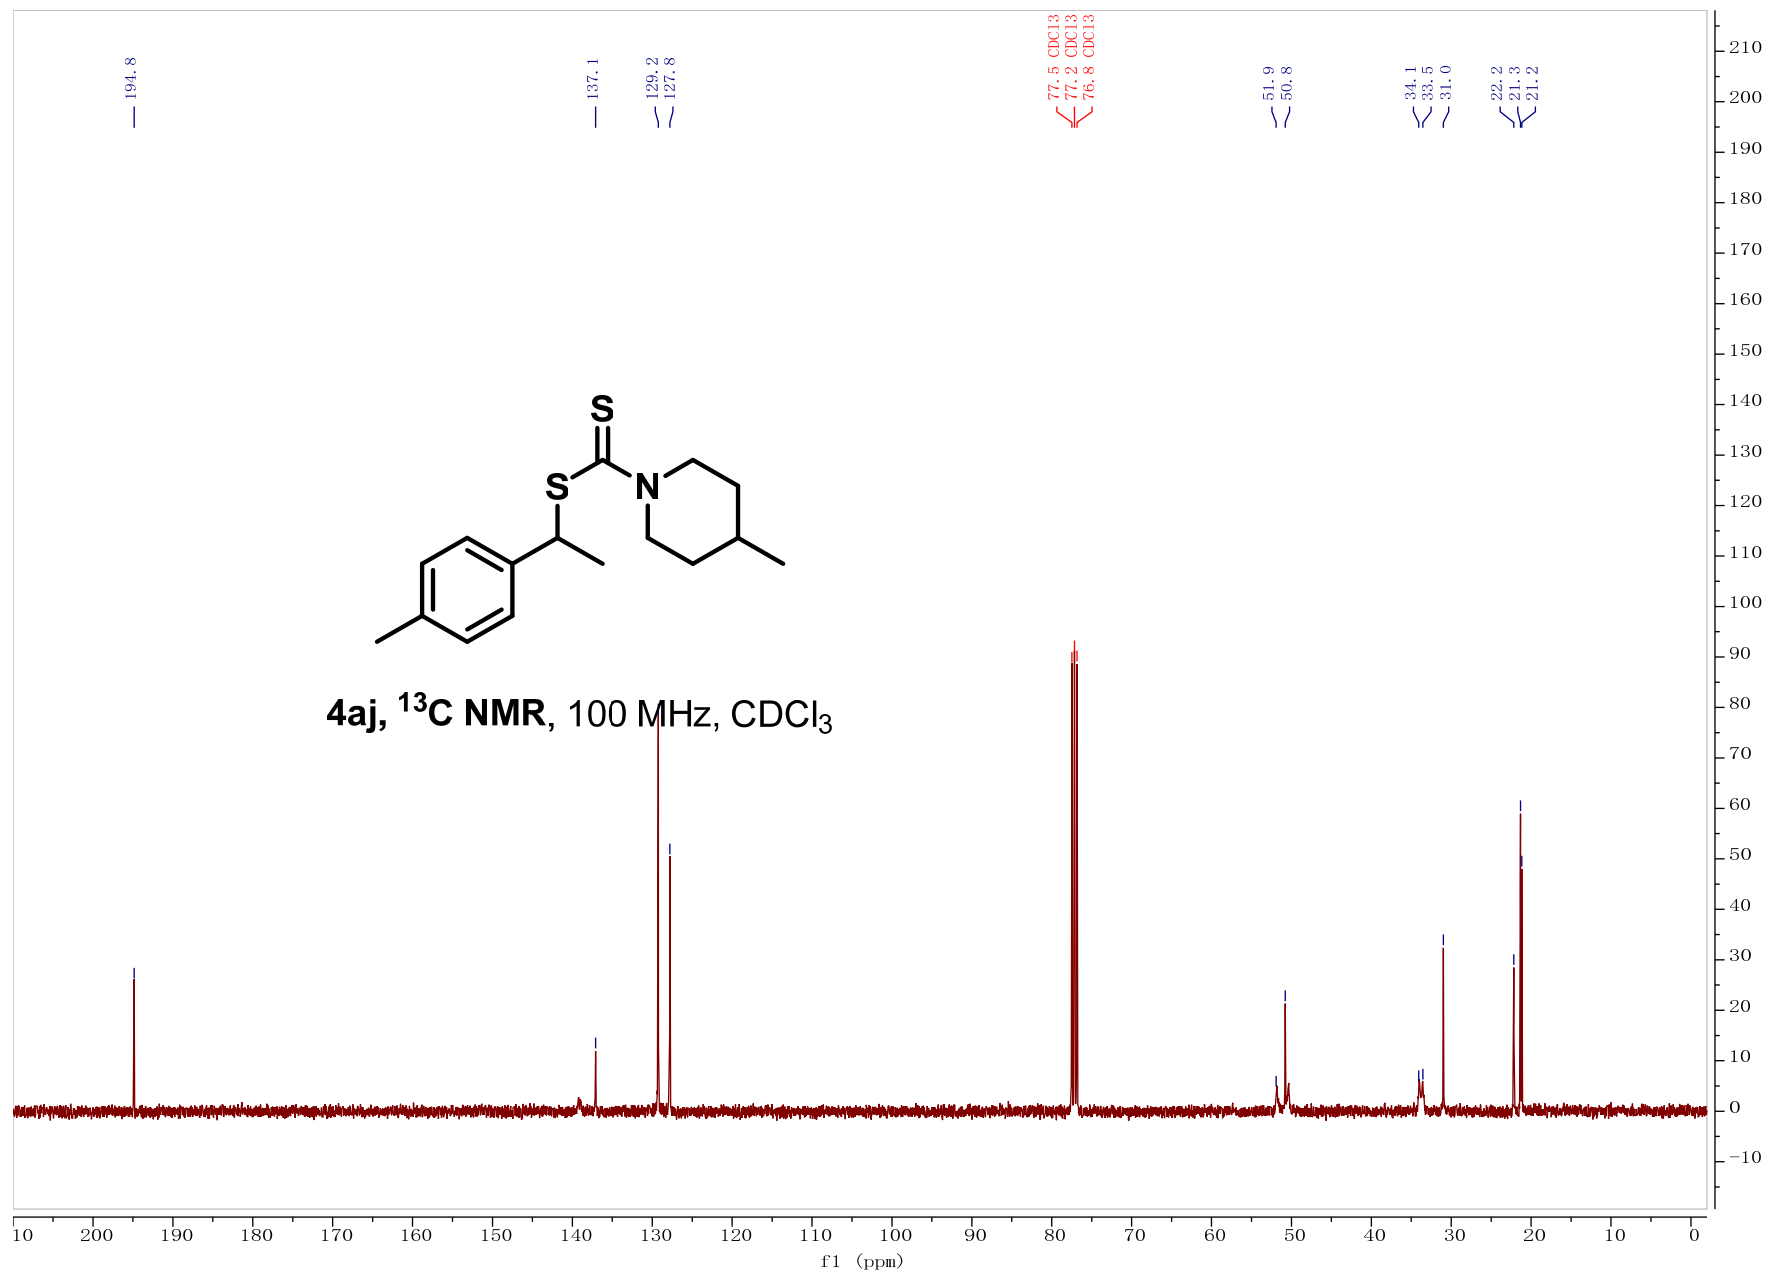

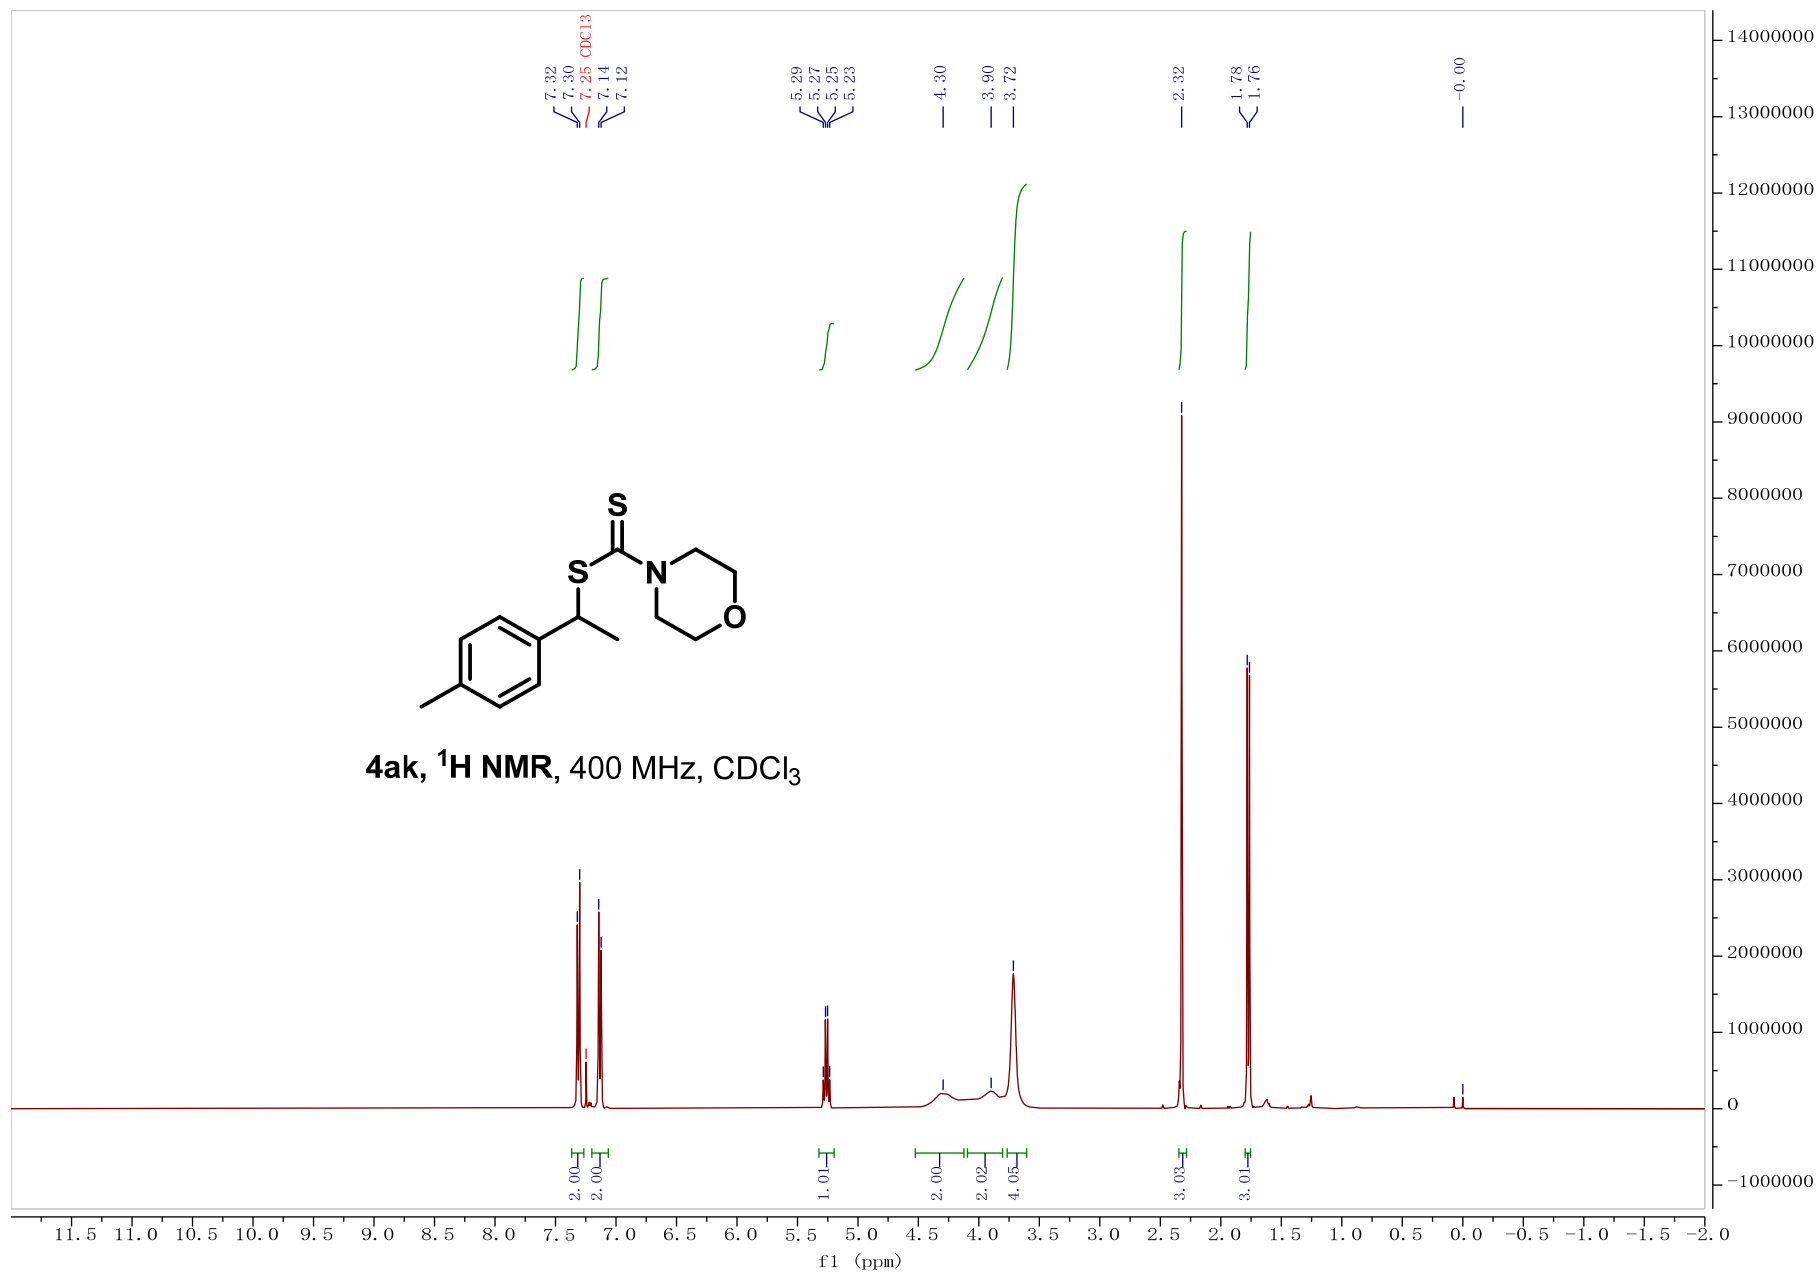

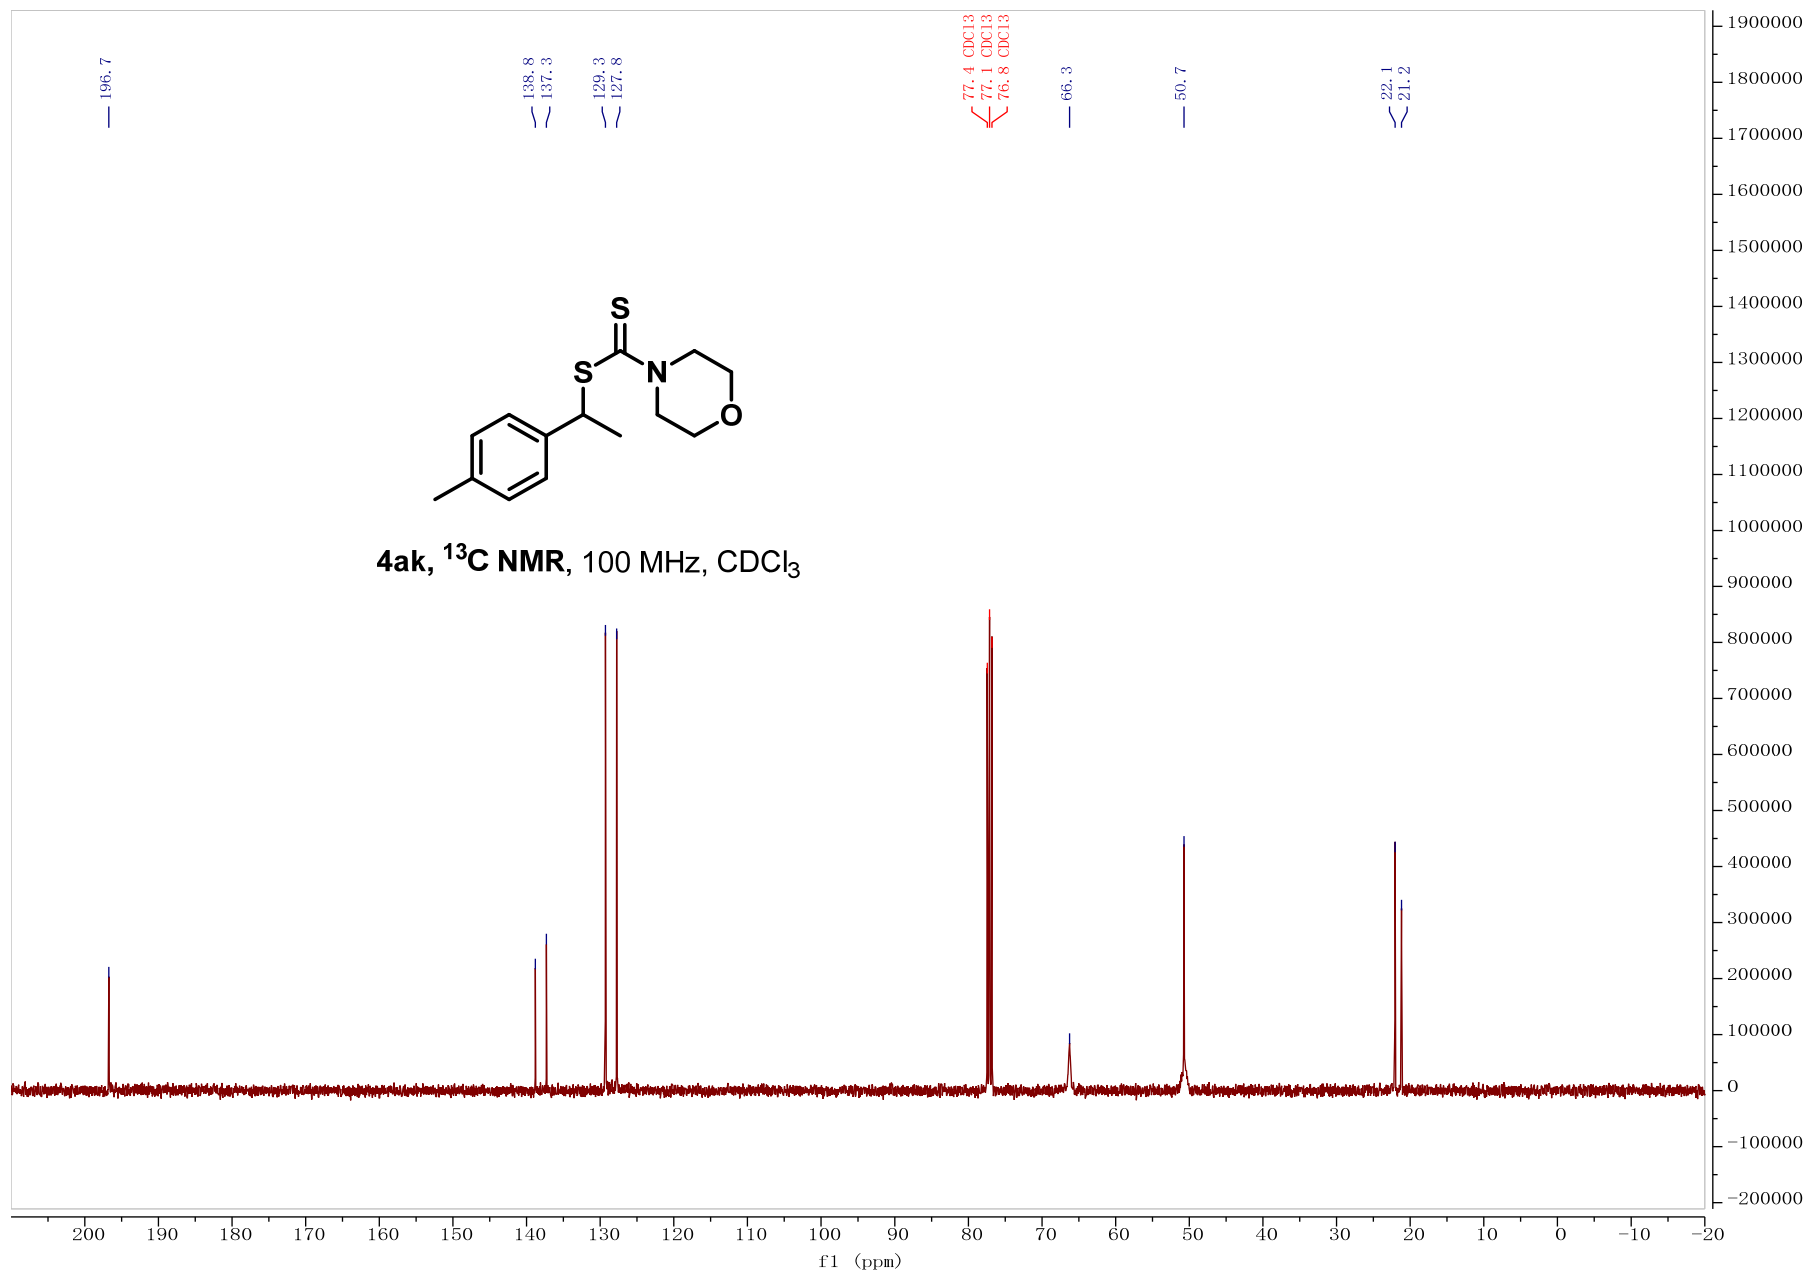

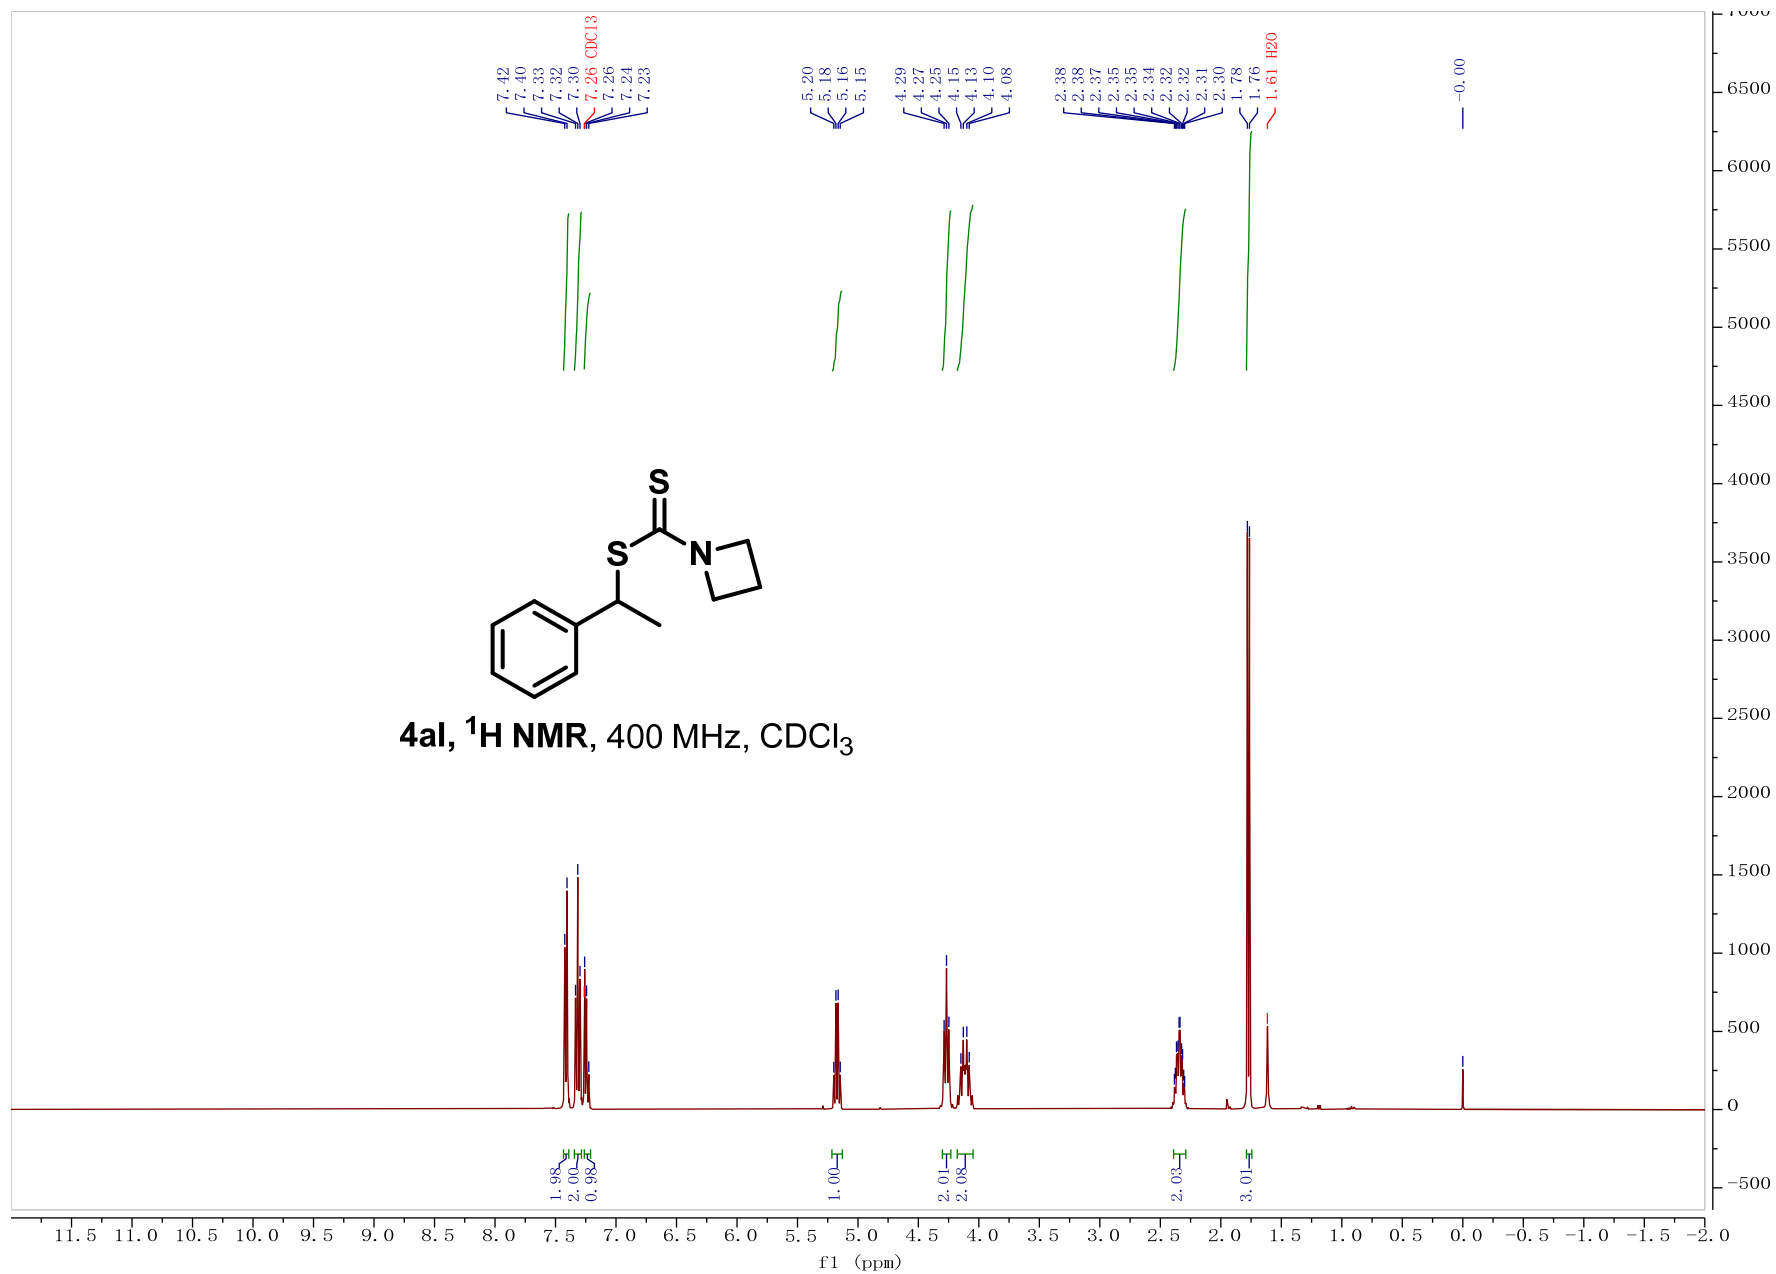

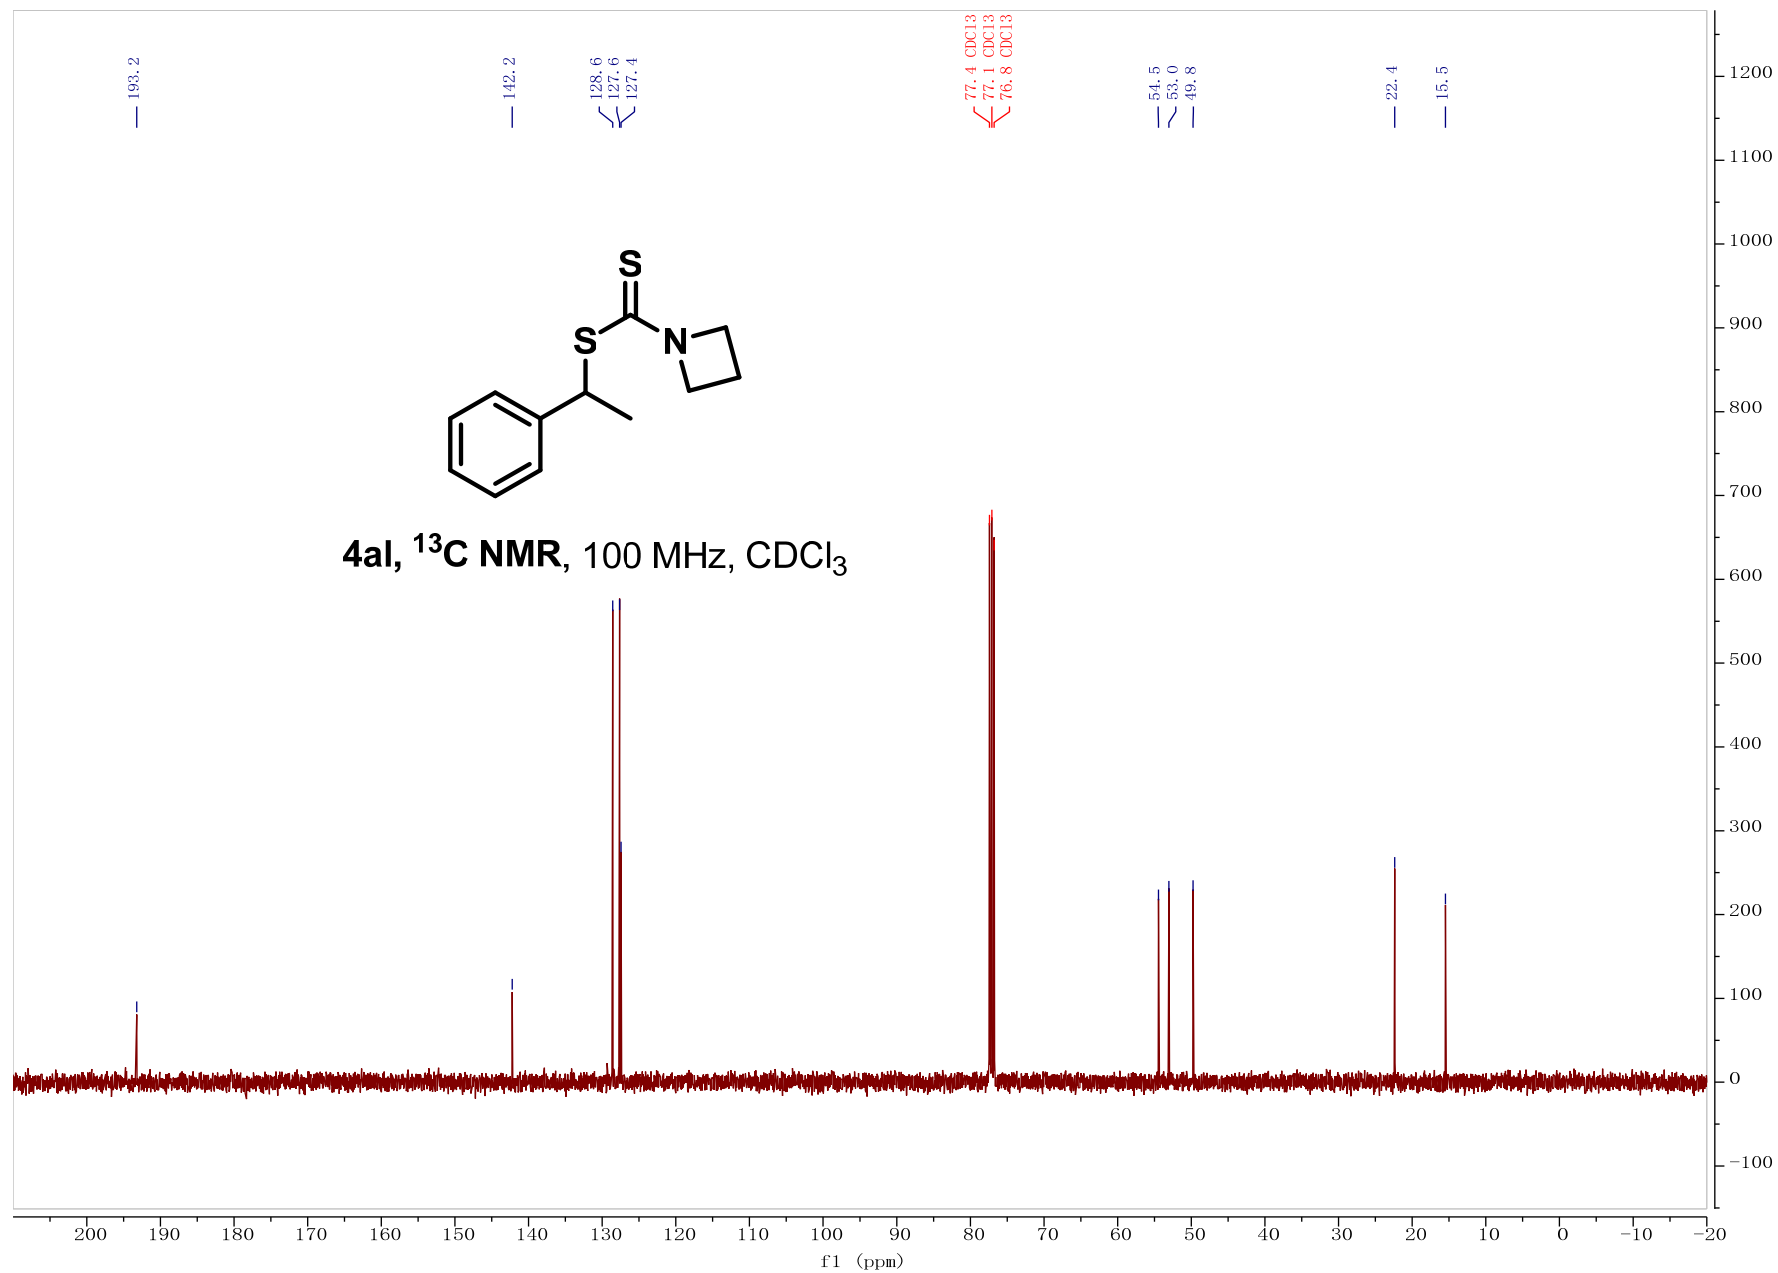

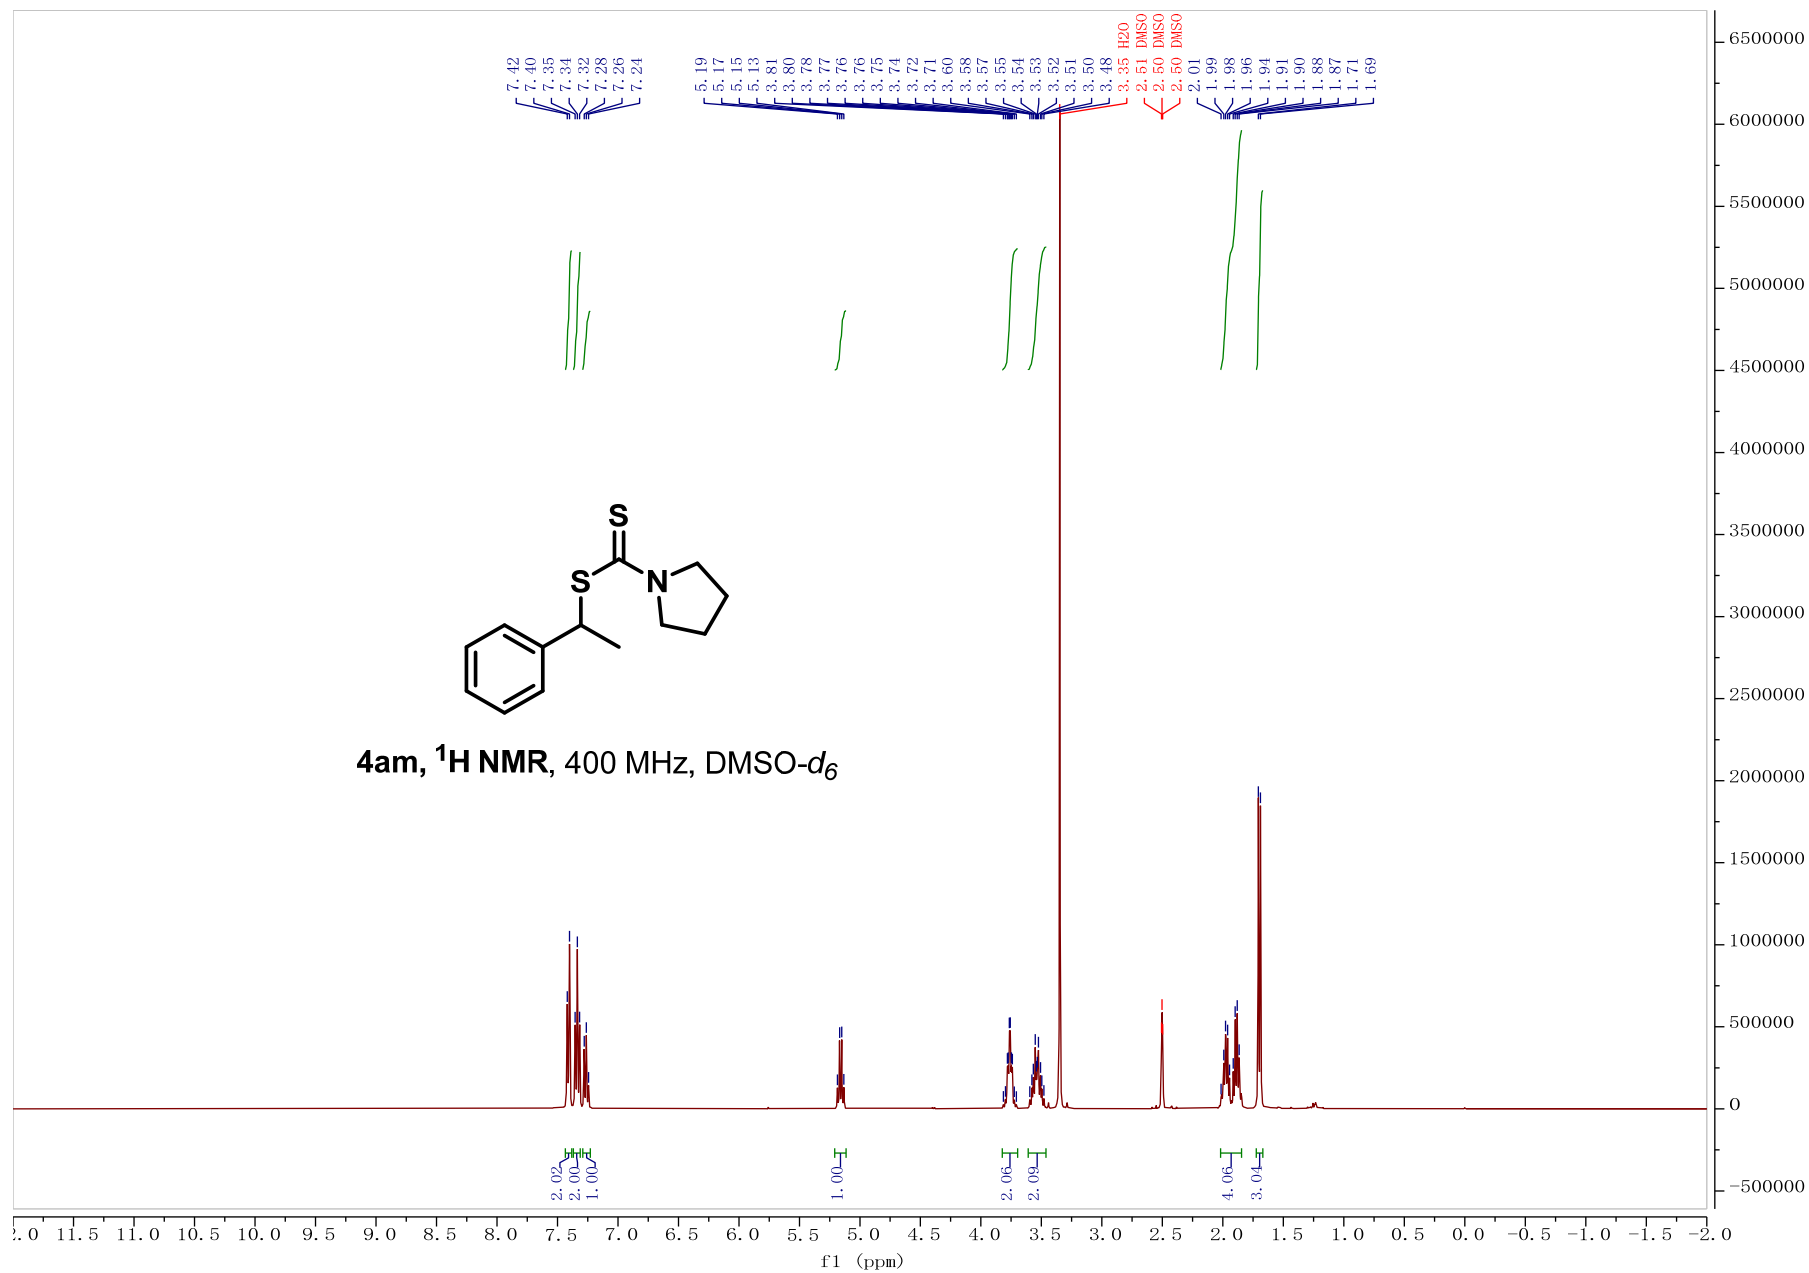

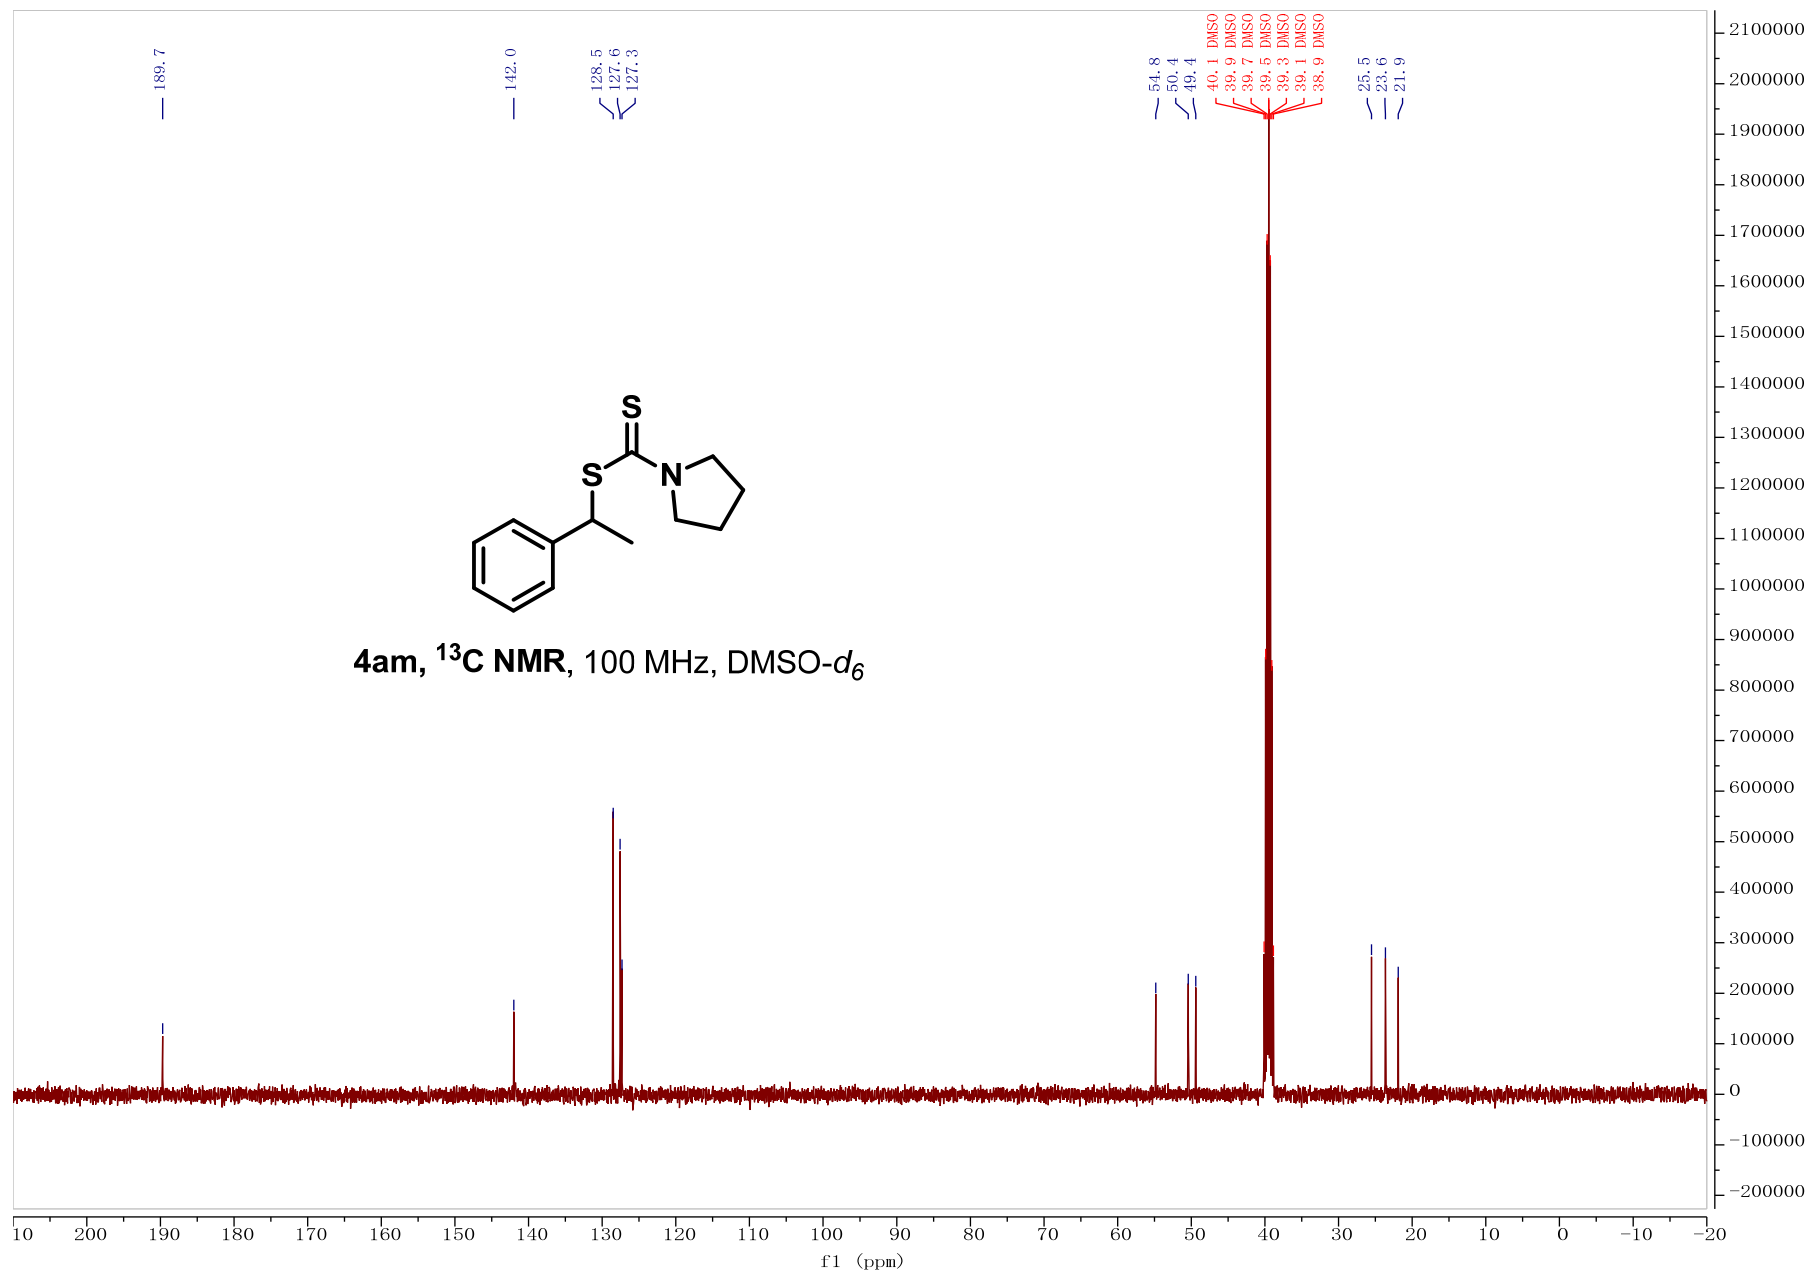

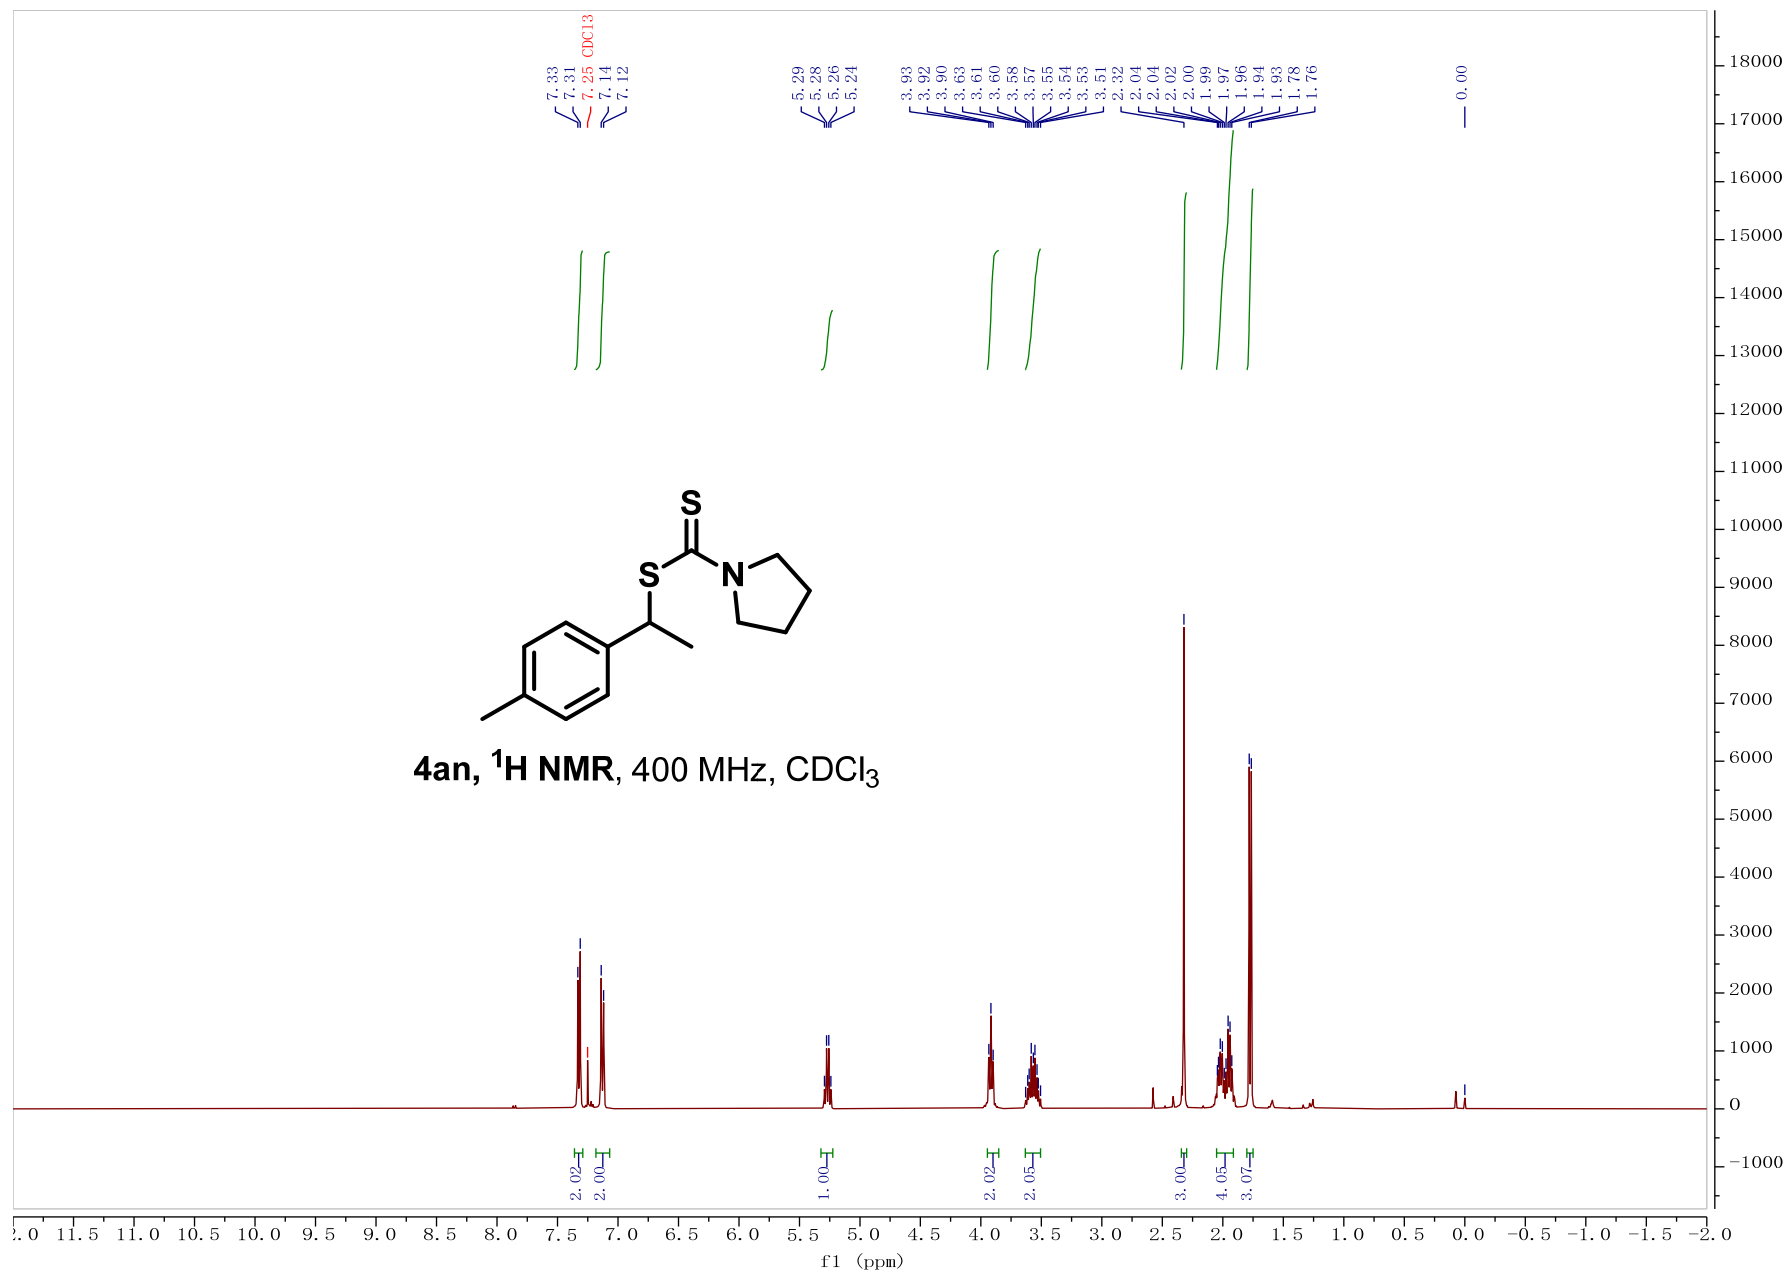

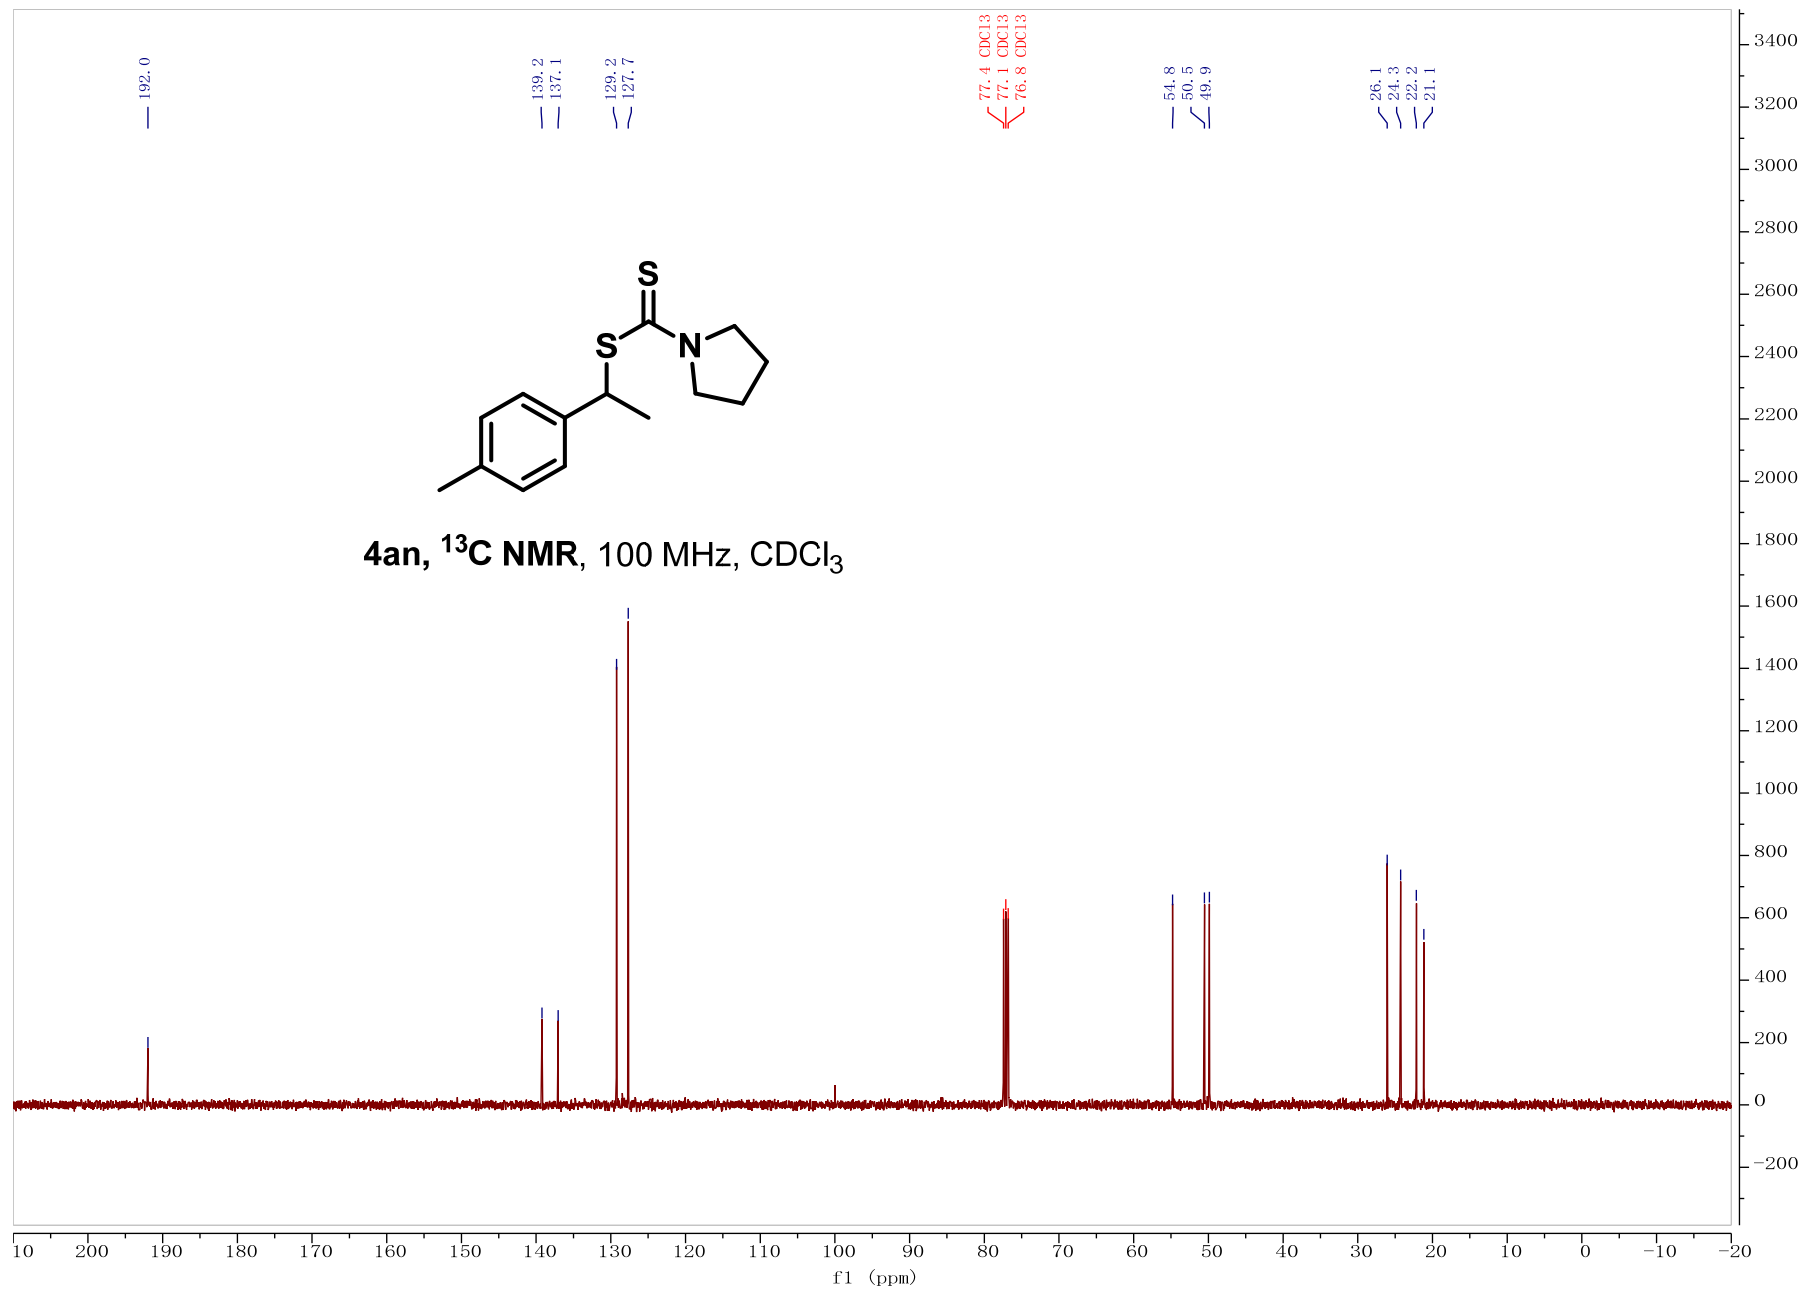

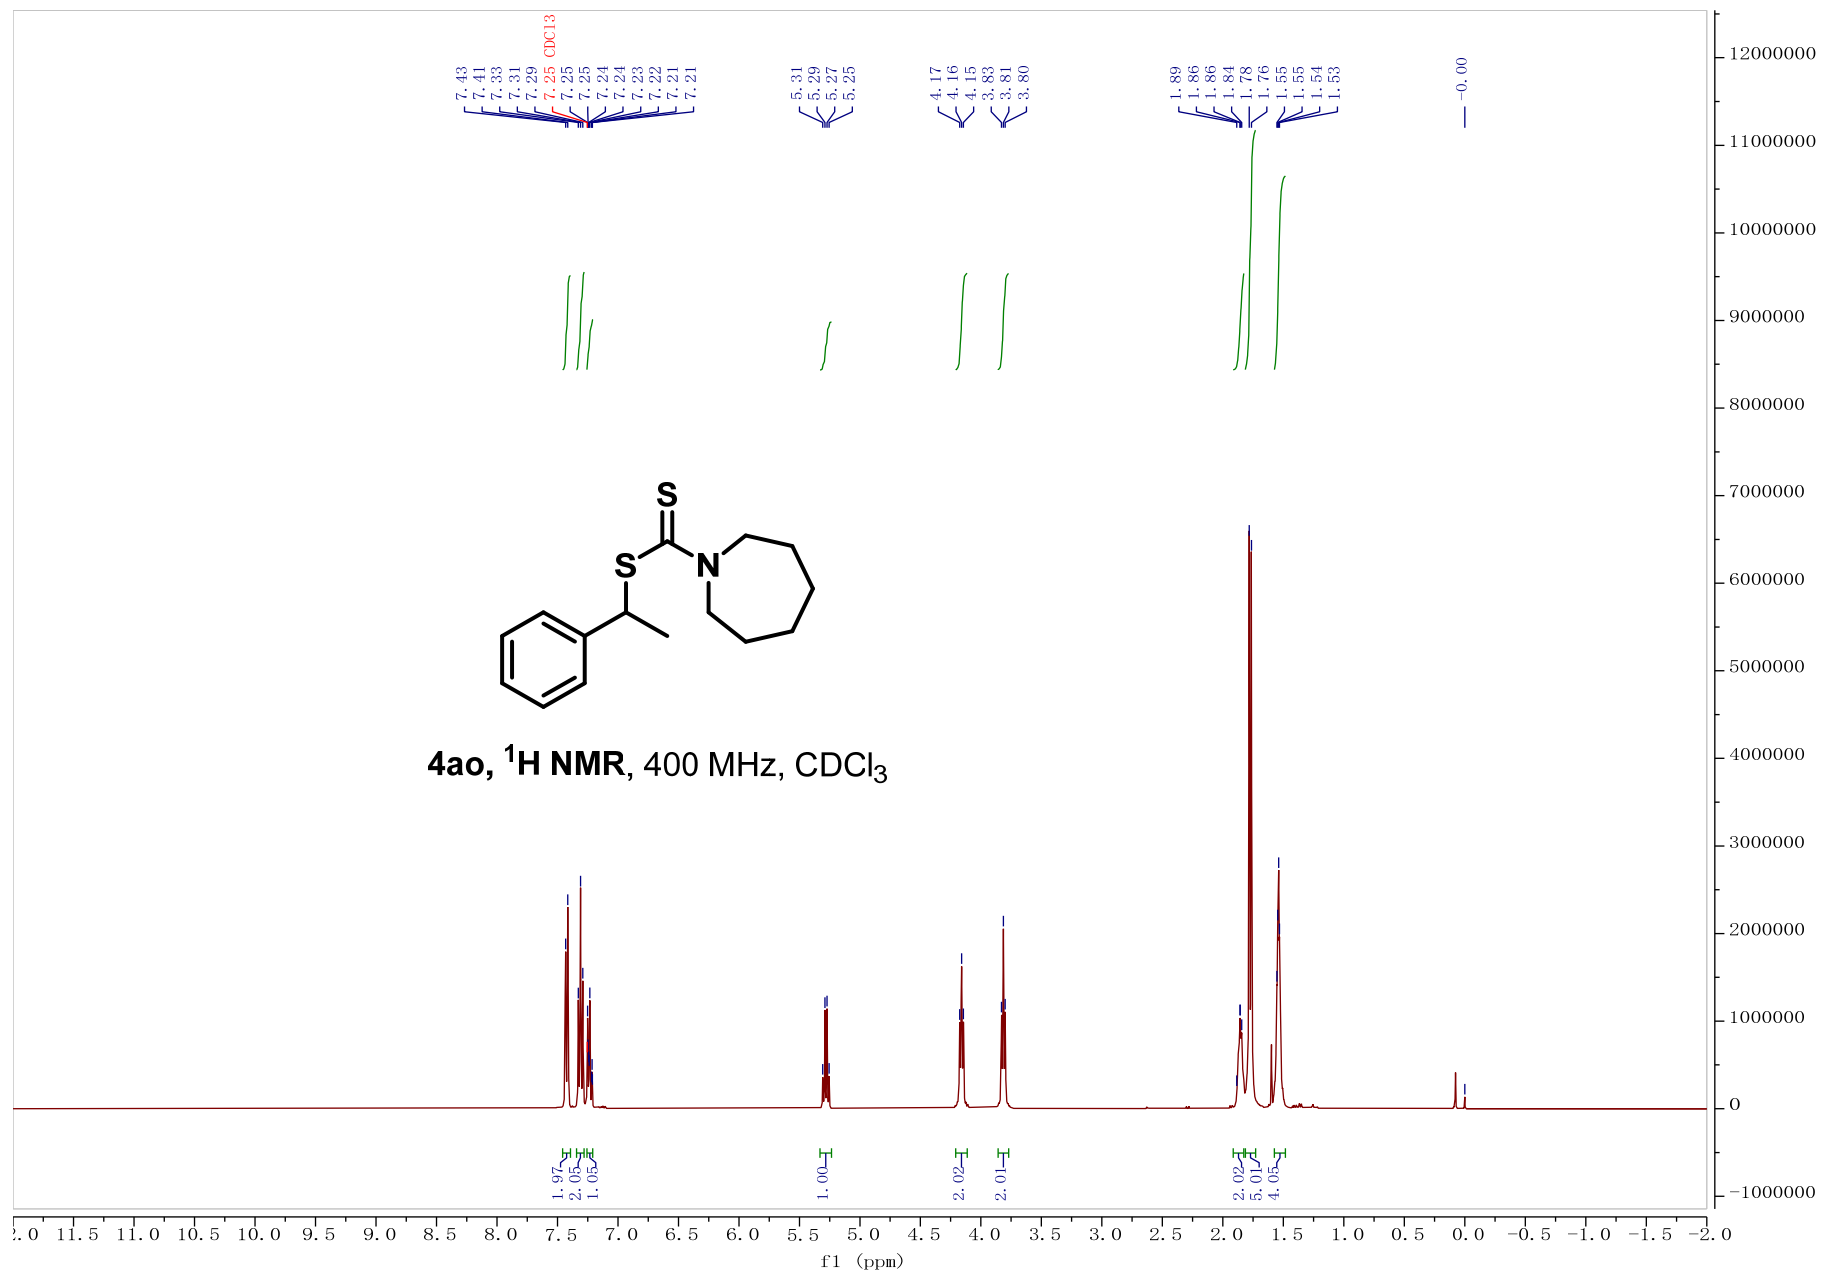

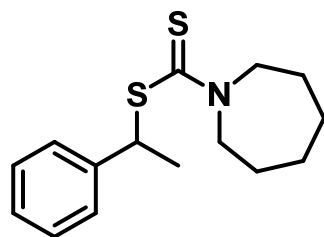

**4ao**,  $^{13}\text{C}$  NMR, 100 MHz,  $\text{CDCl}_3$

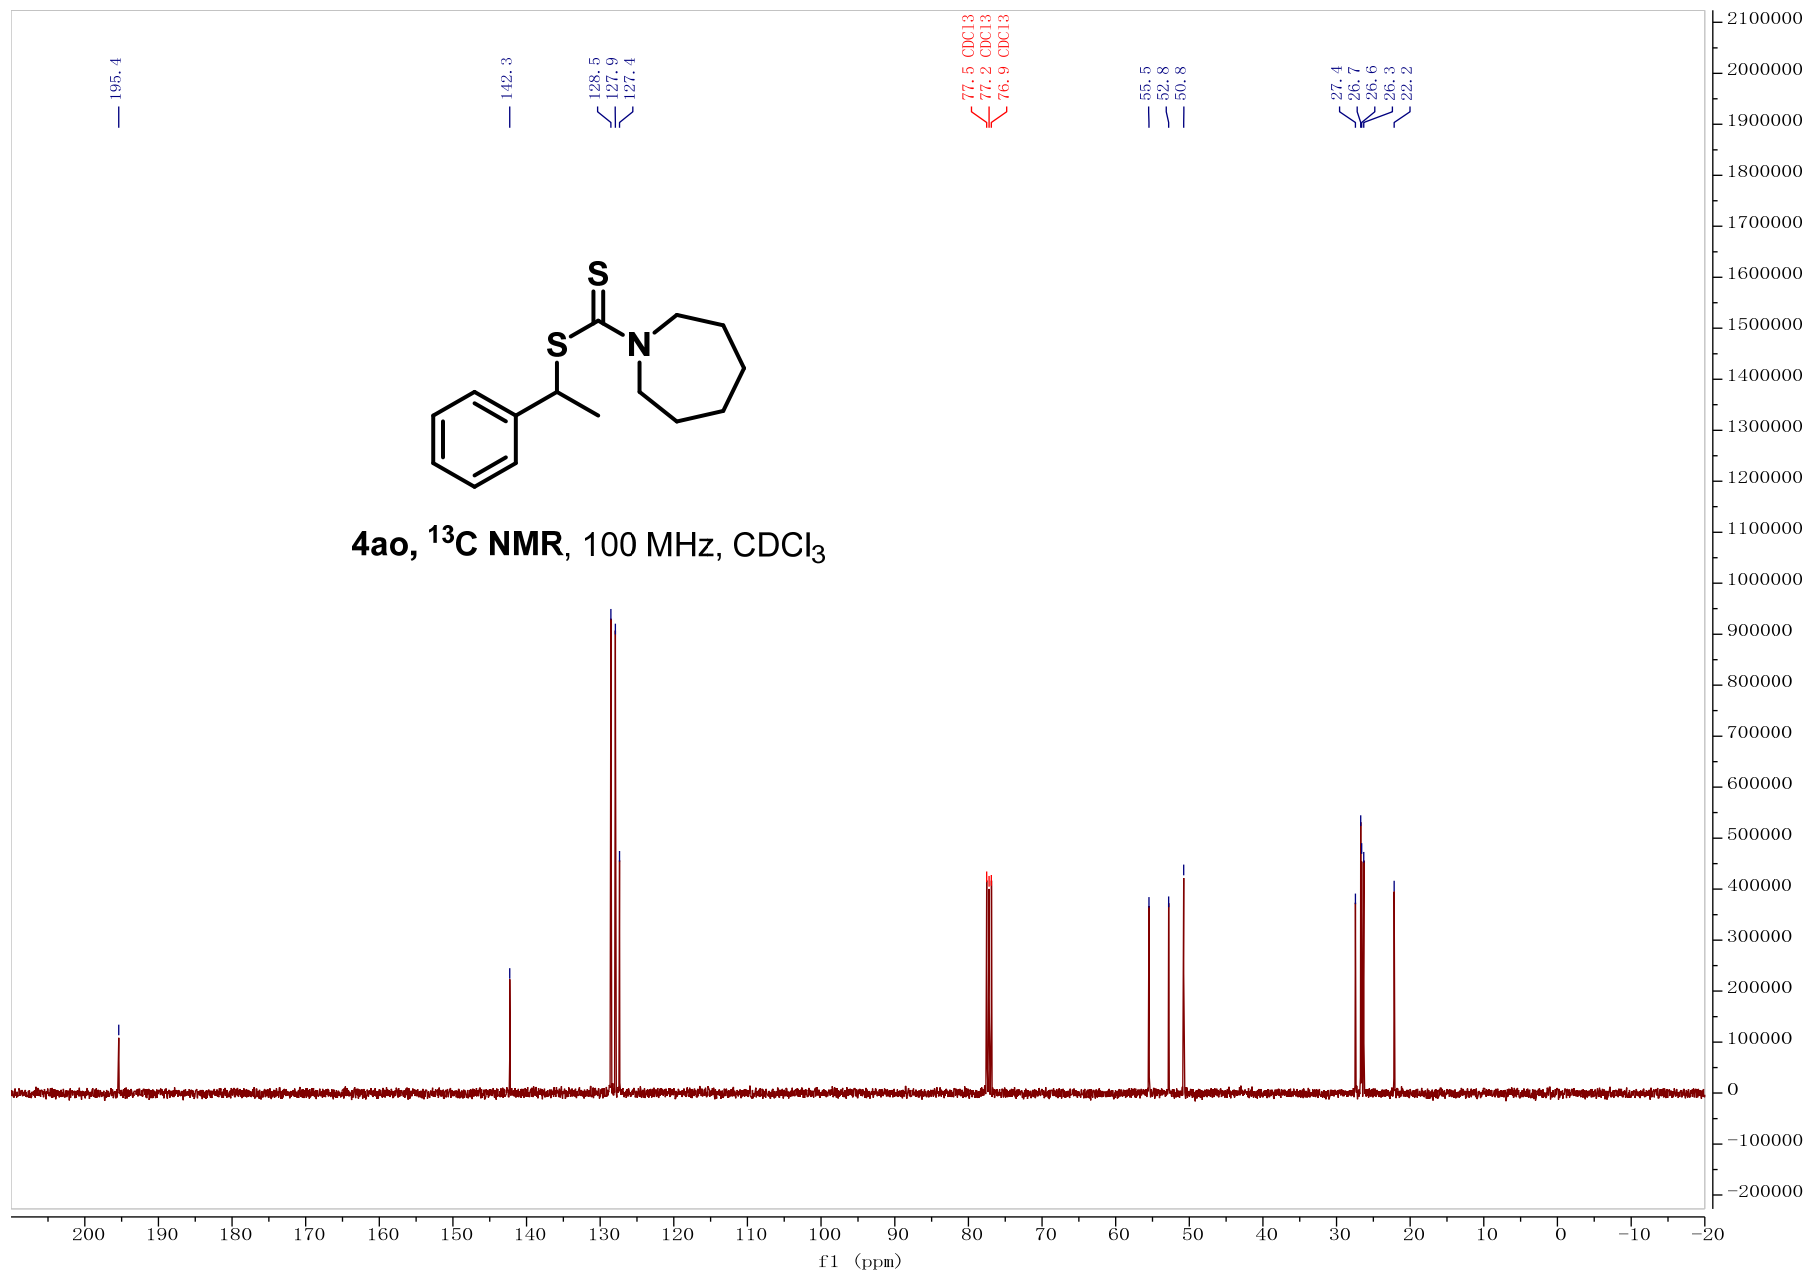

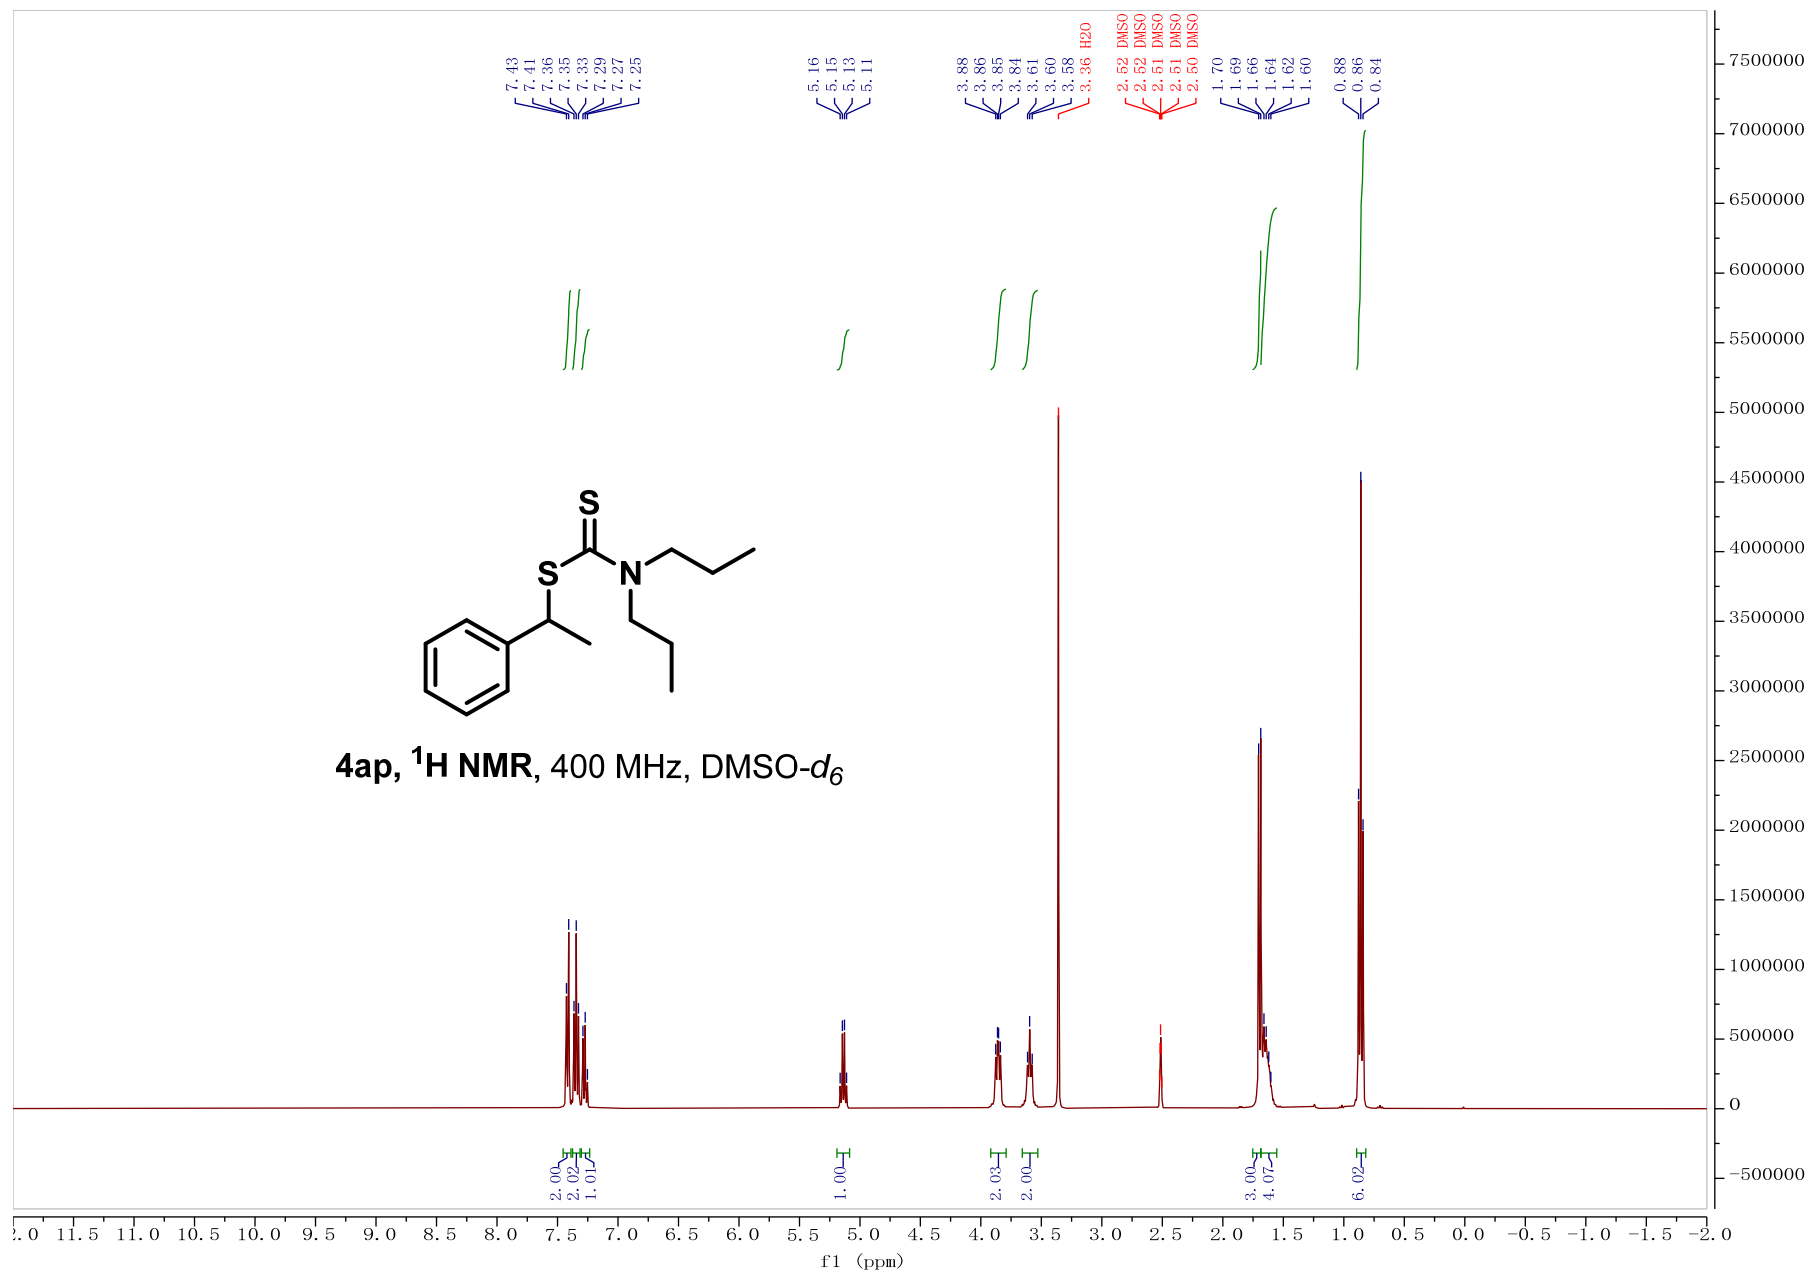

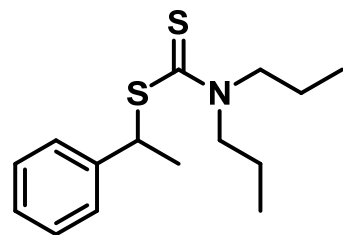

4ap,  $^{13}\text{C}$  NMR, 100 MHz,  $\text{DMSO}-d_6$

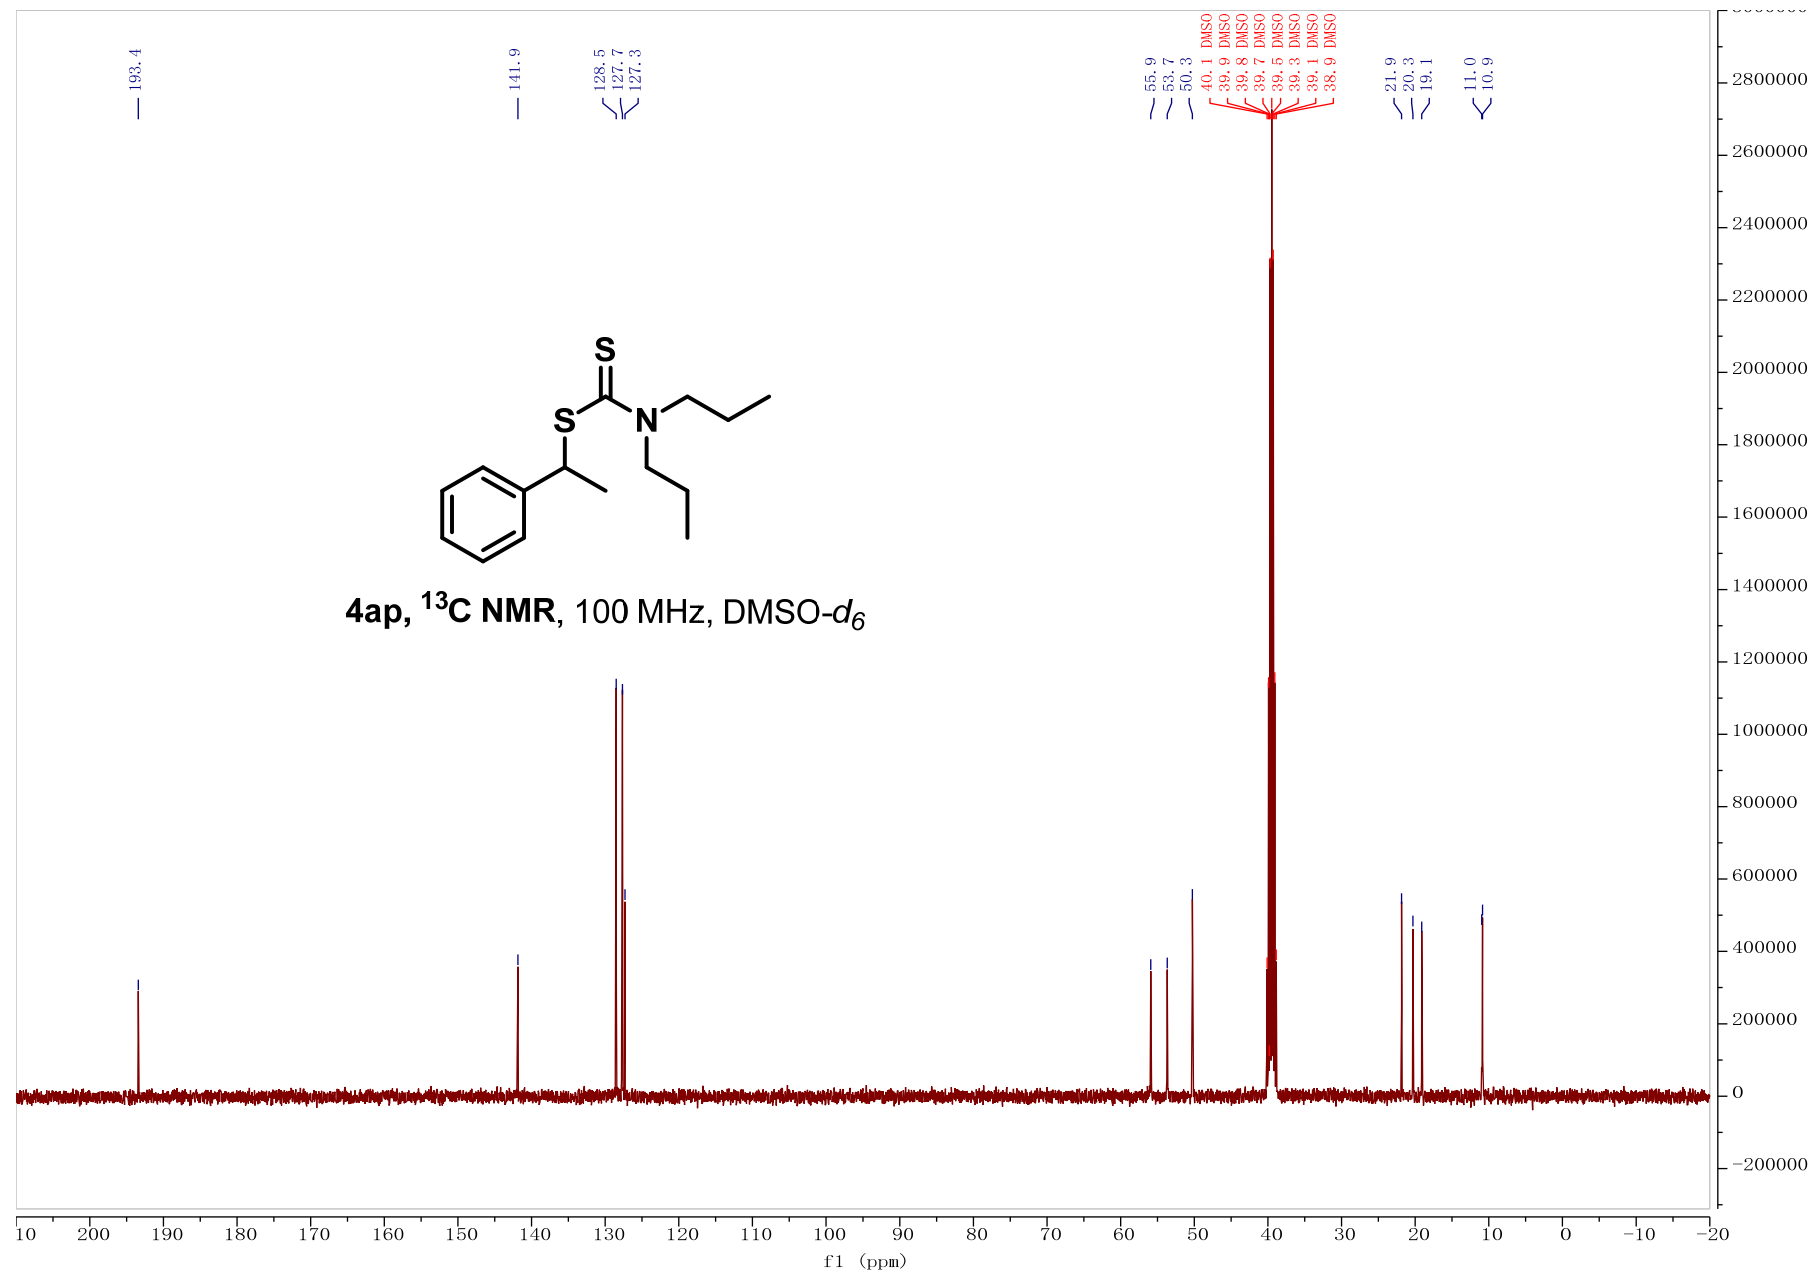

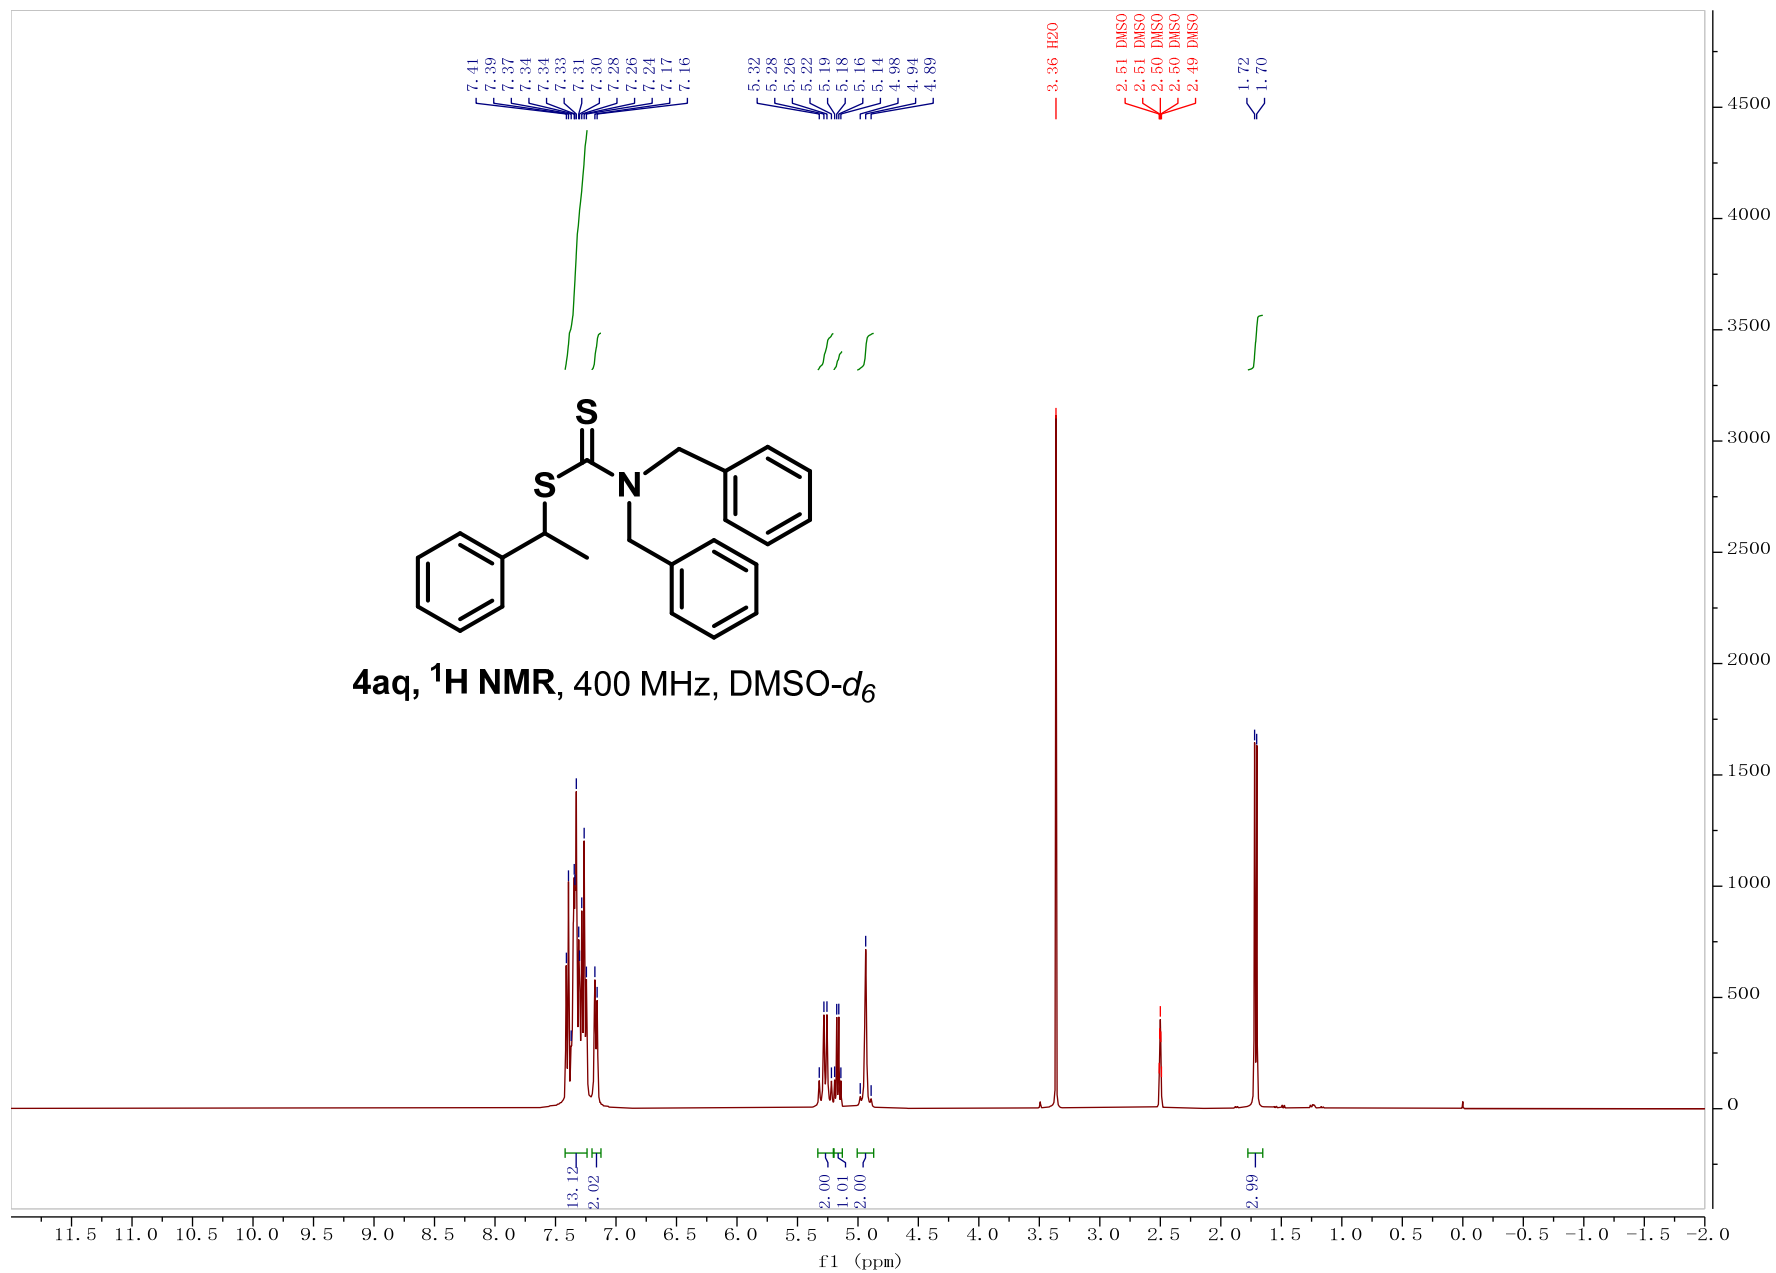

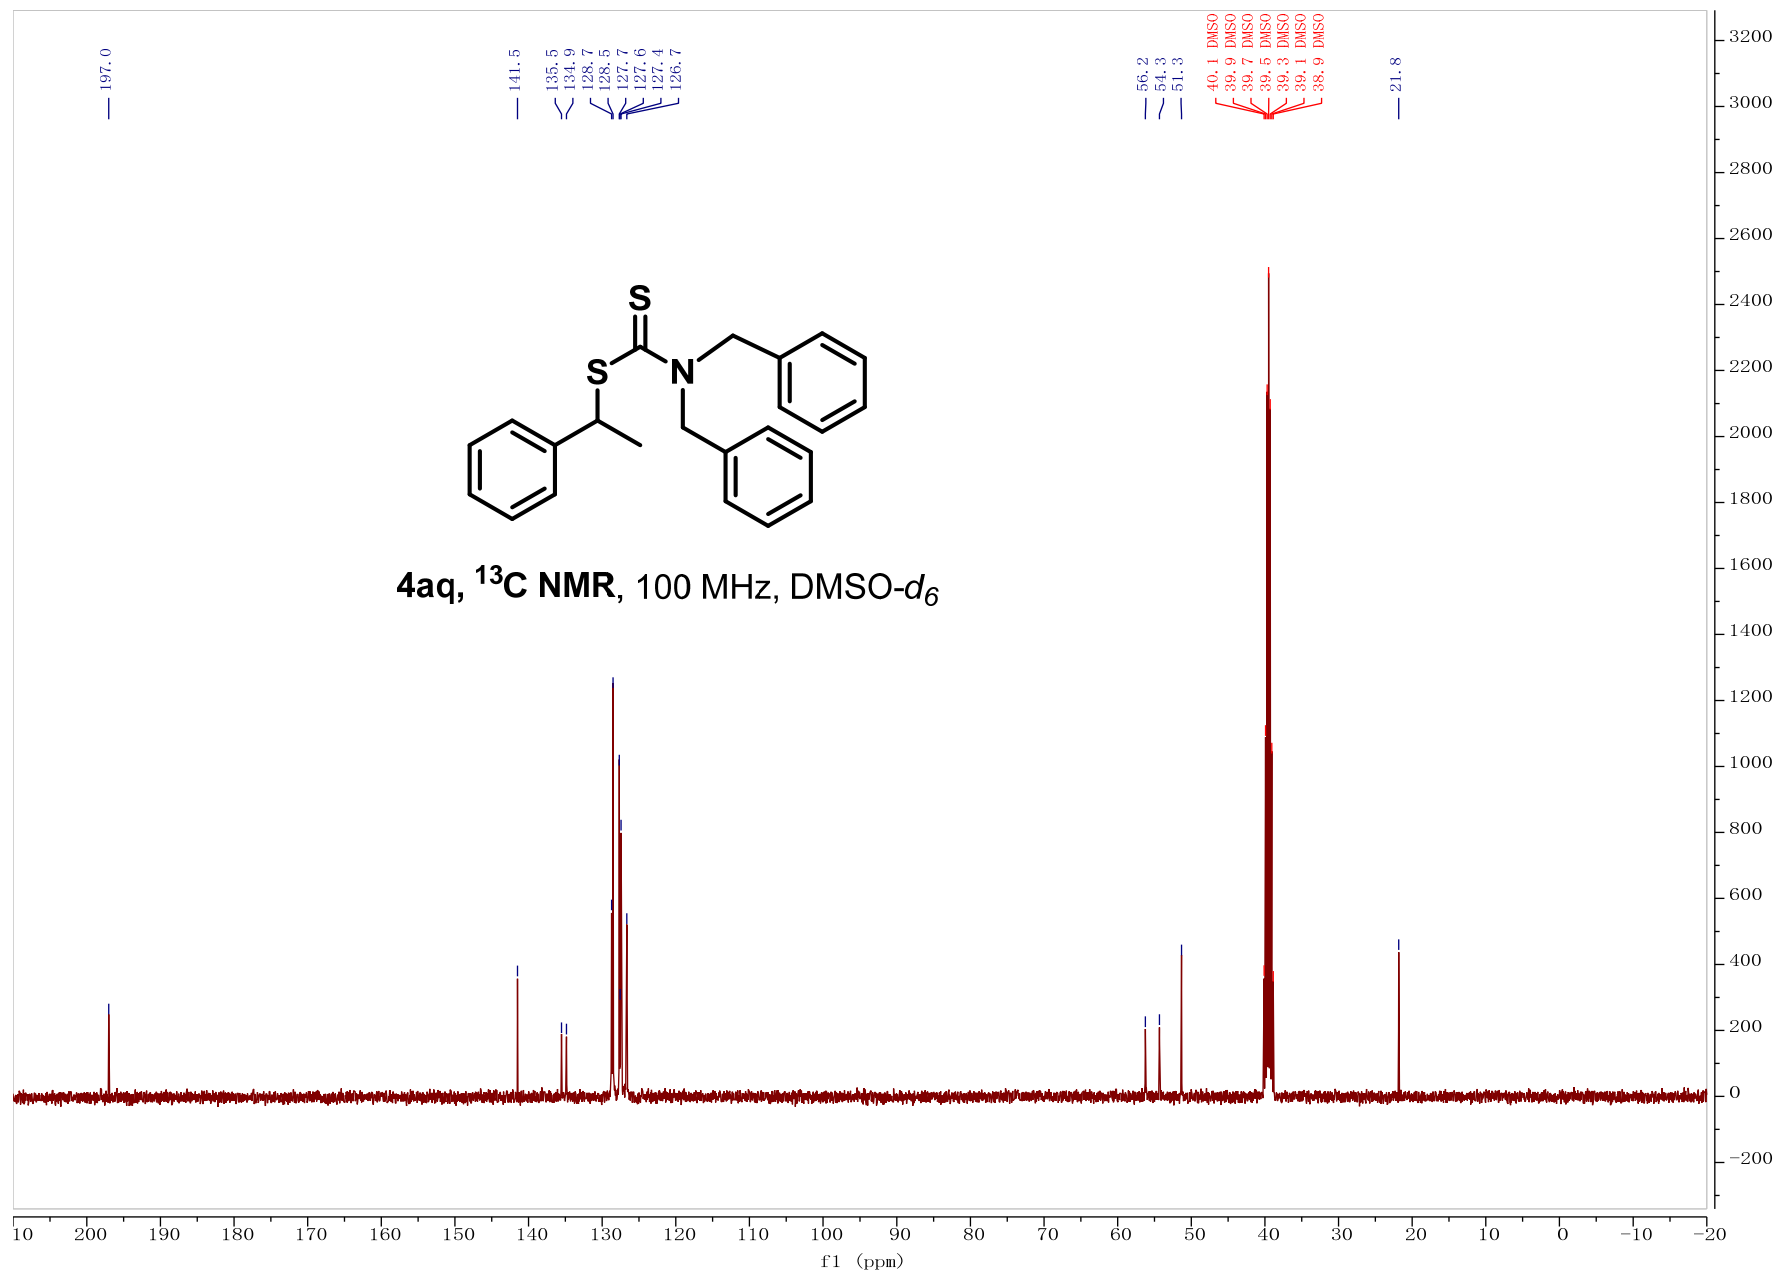

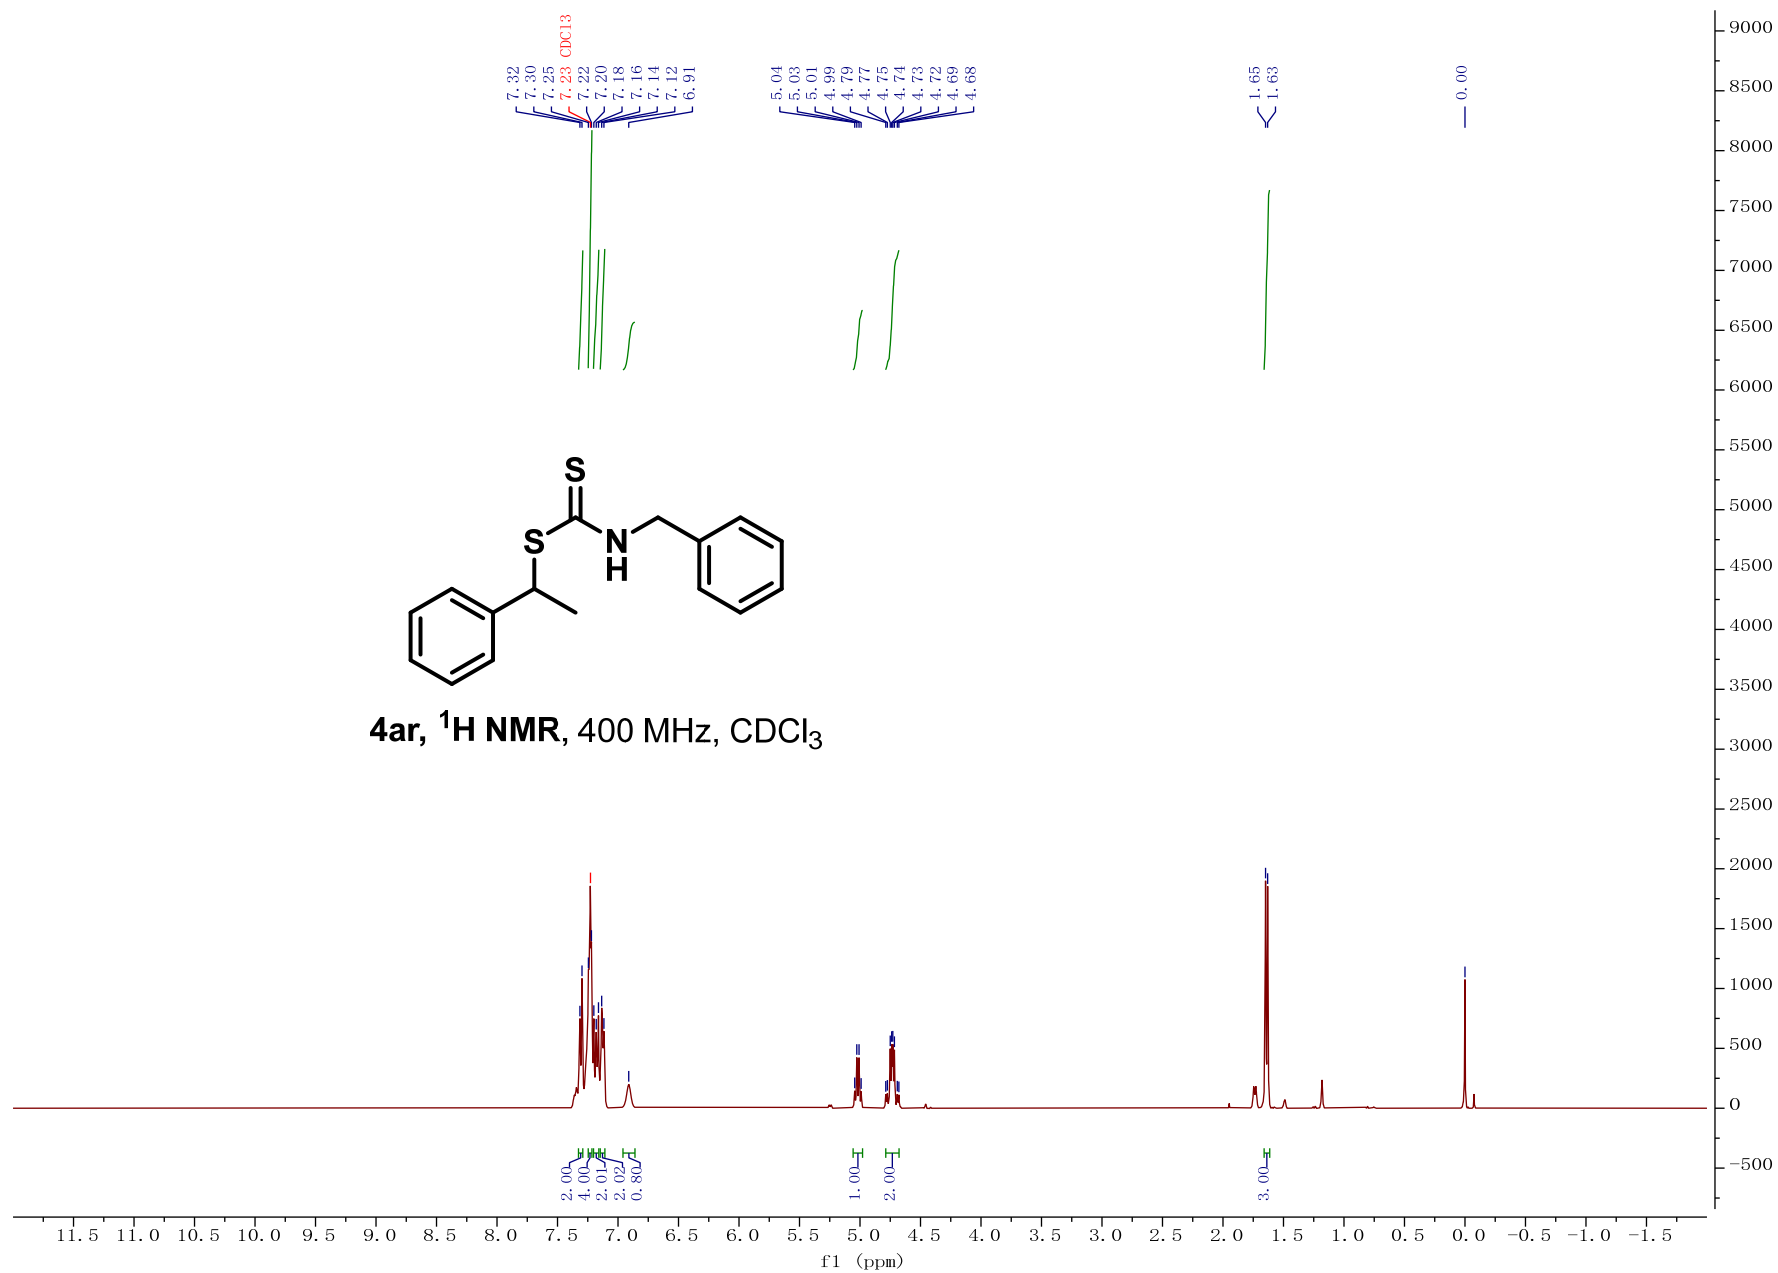

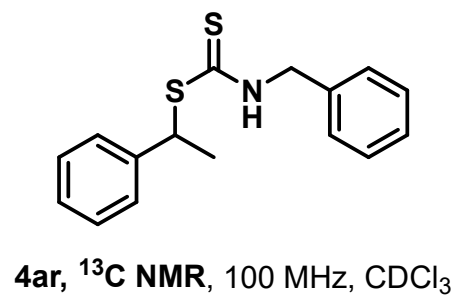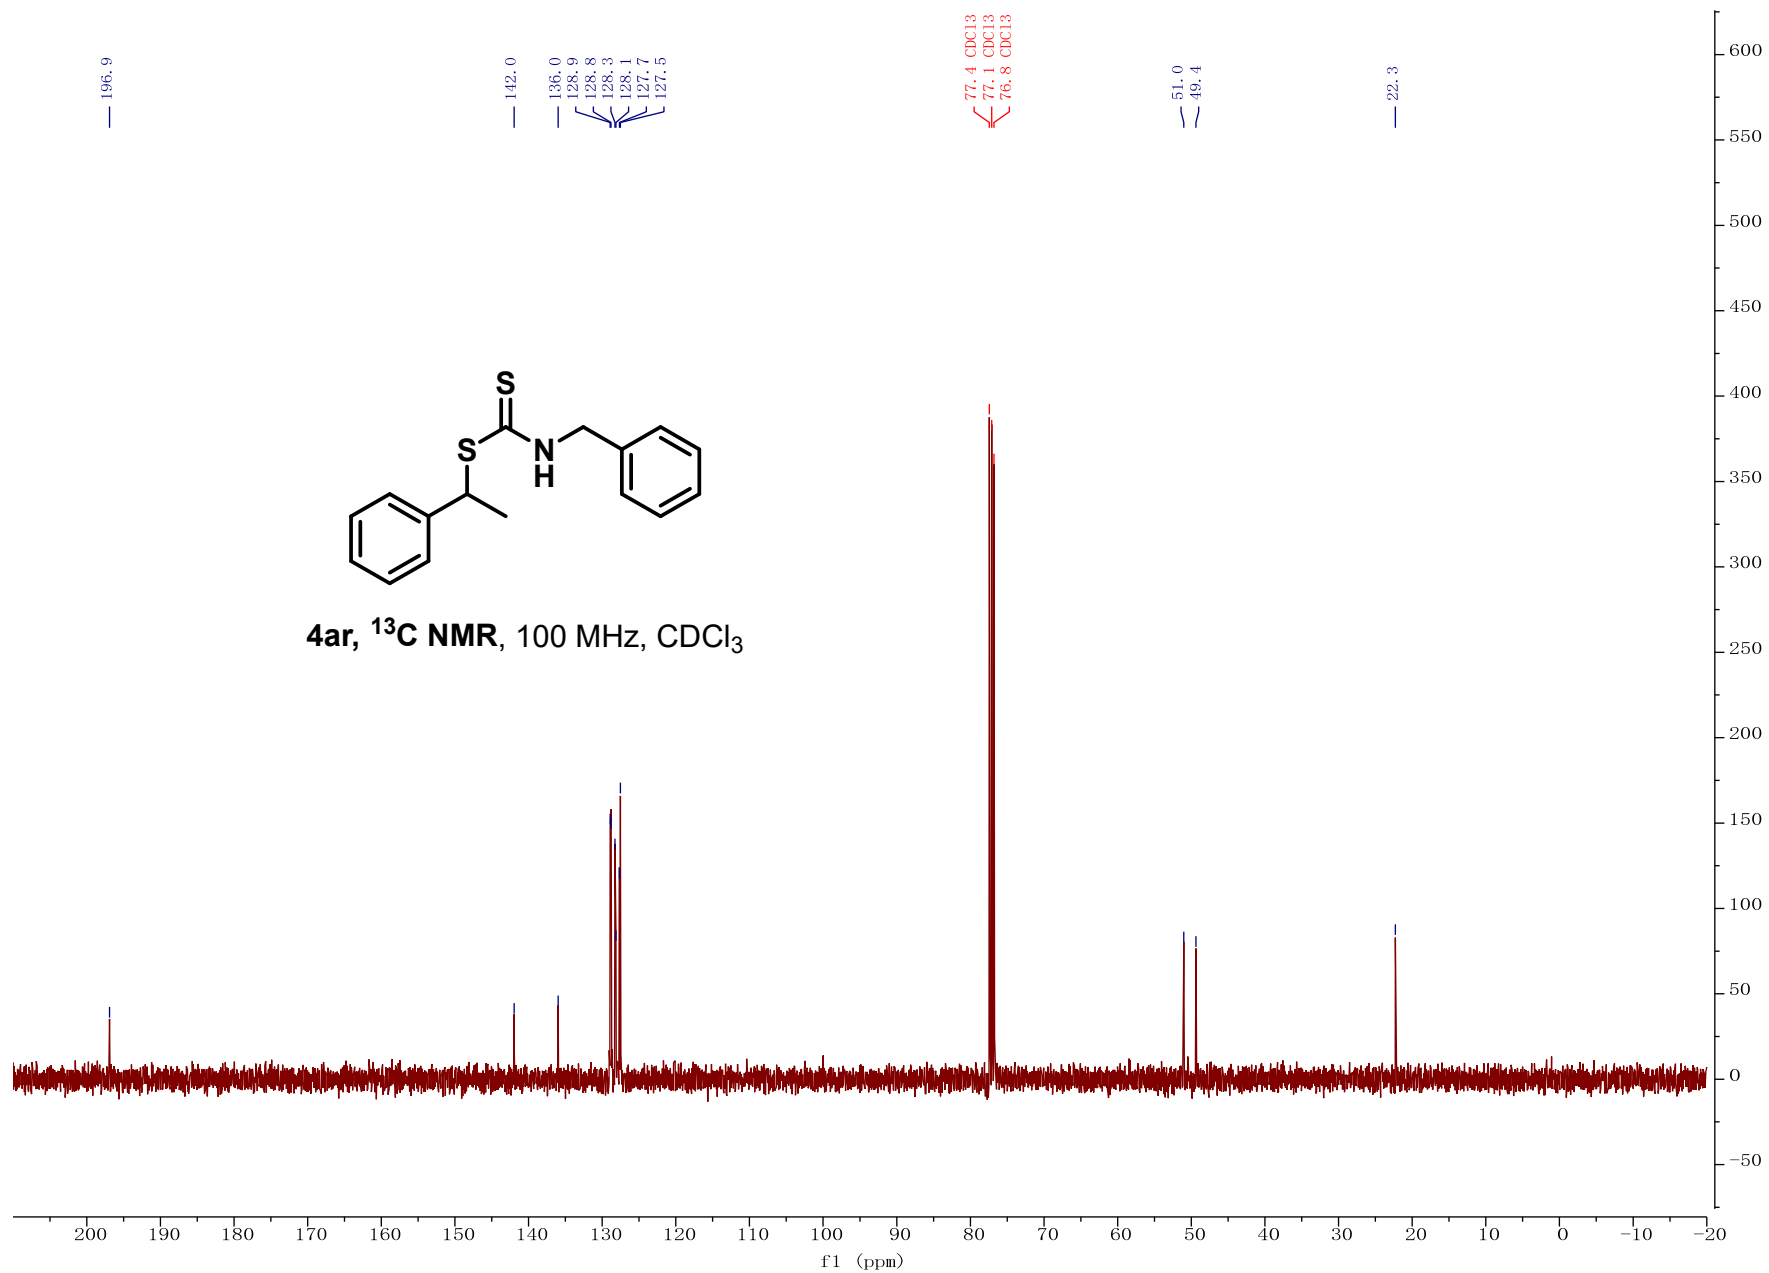

## 12. Spectroscopic data for compounds compound 6

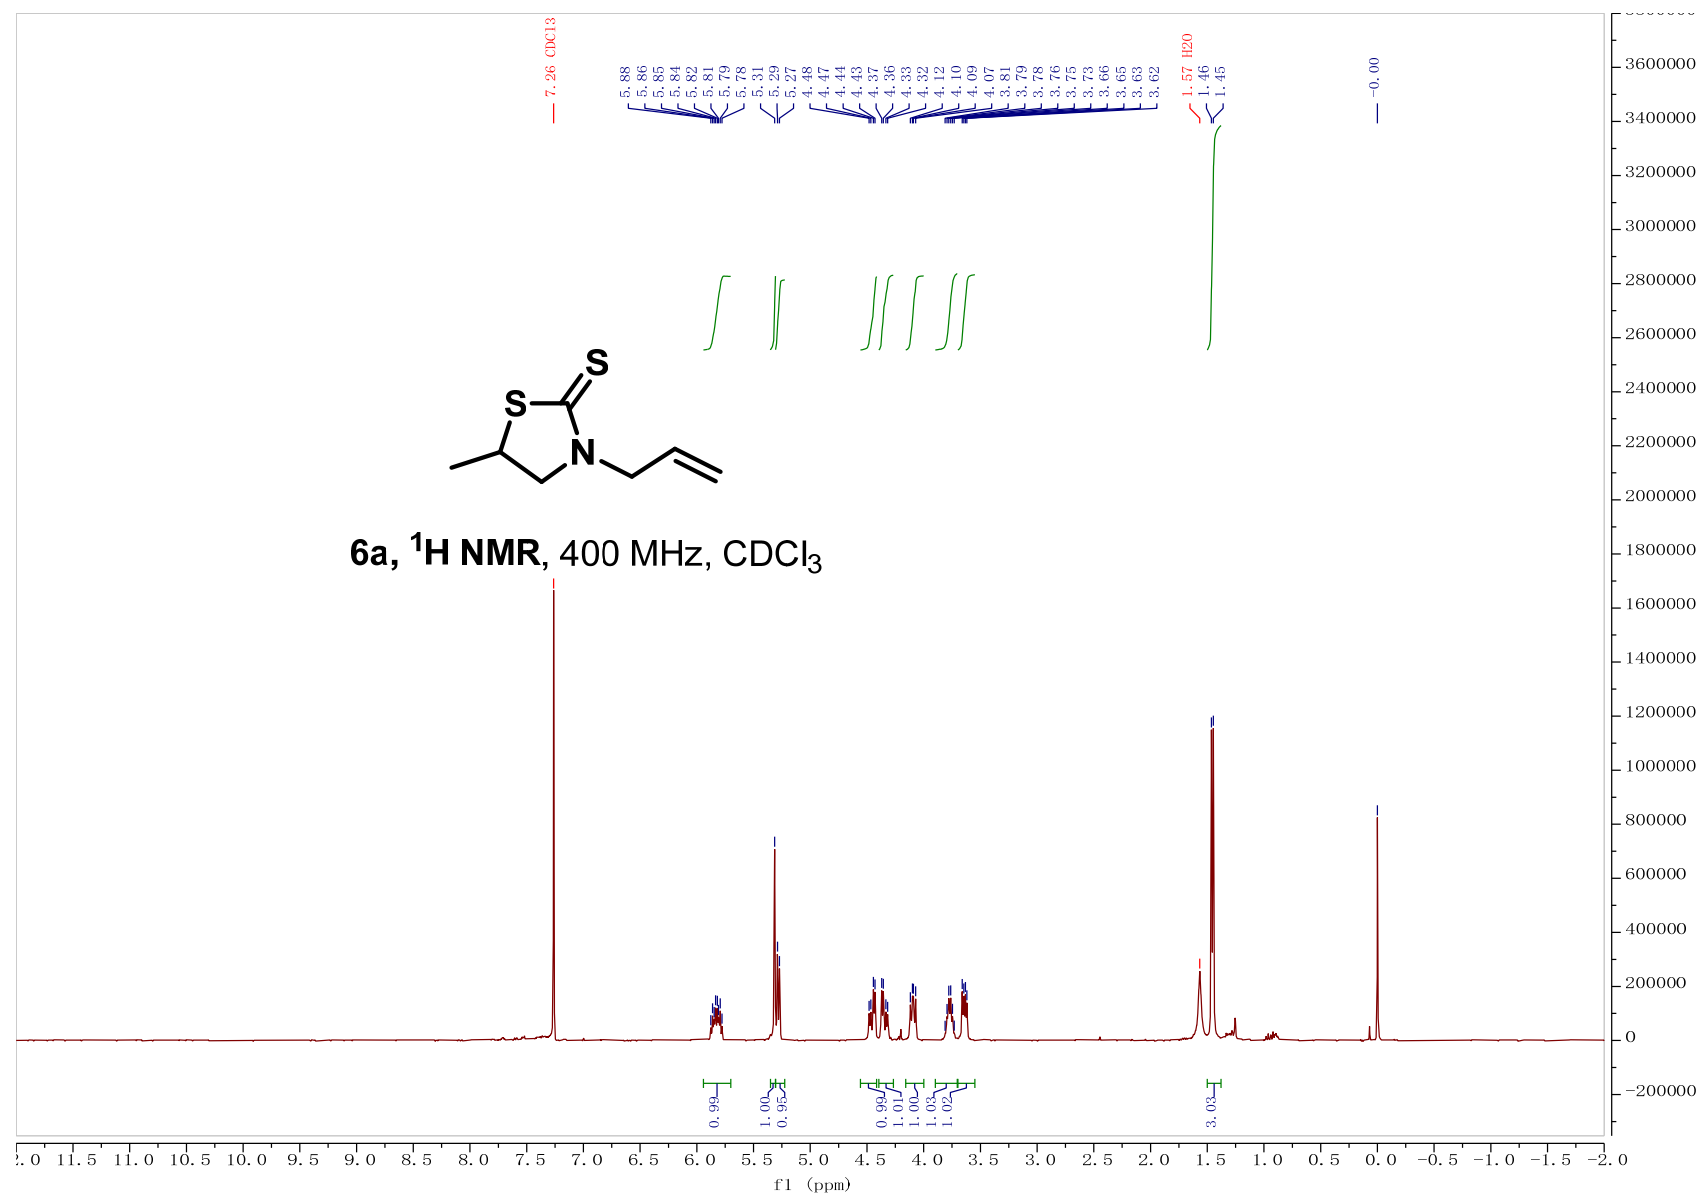

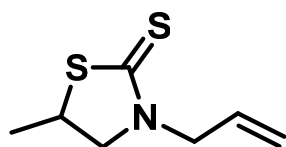

6a,  $^{13}\text{C}$  NMR, 100 MHz,  $\text{CDCl}_3$

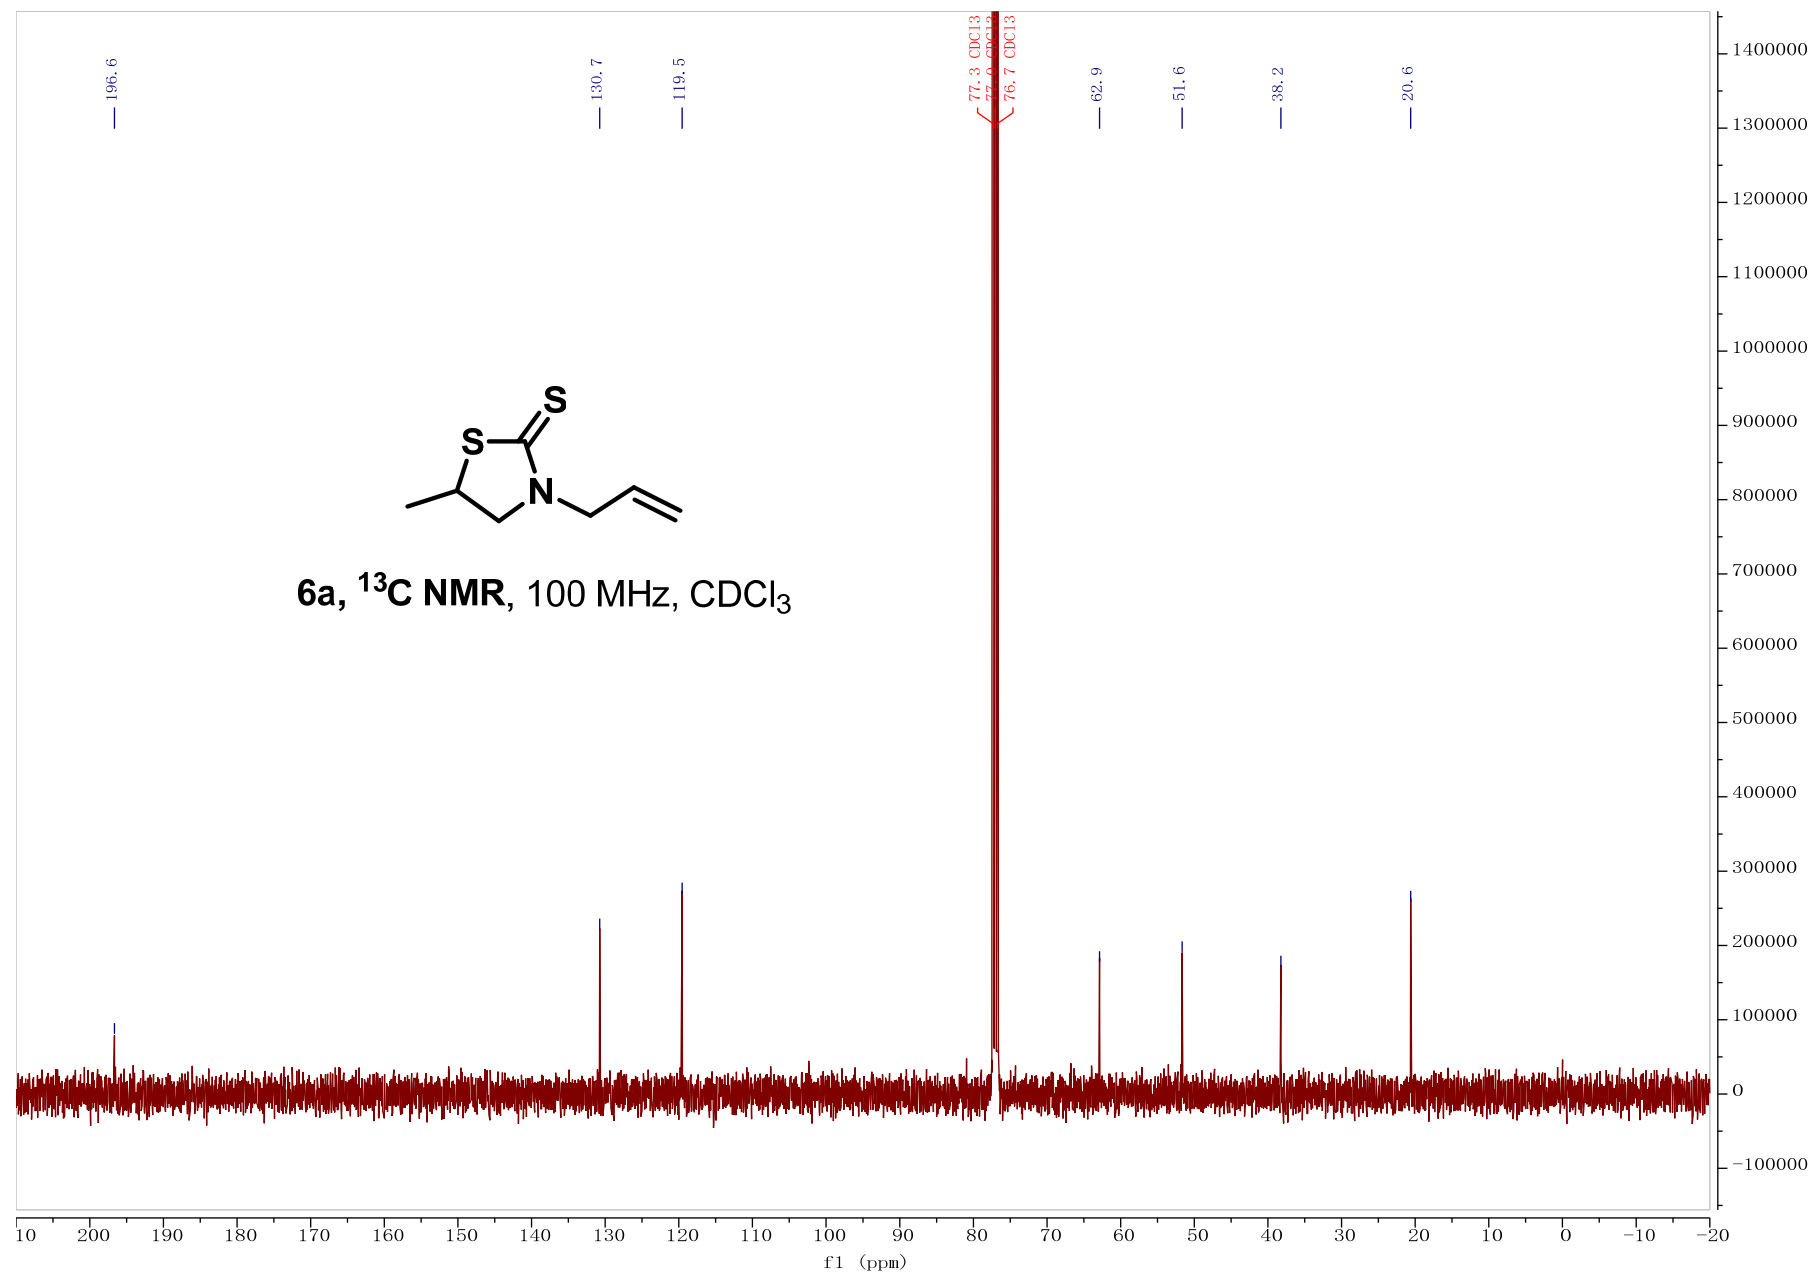

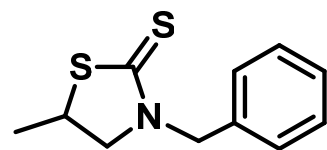

**6b**,  $^1\text{H}$  NMR, 400 MHz,  $\text{CDCl}_3$

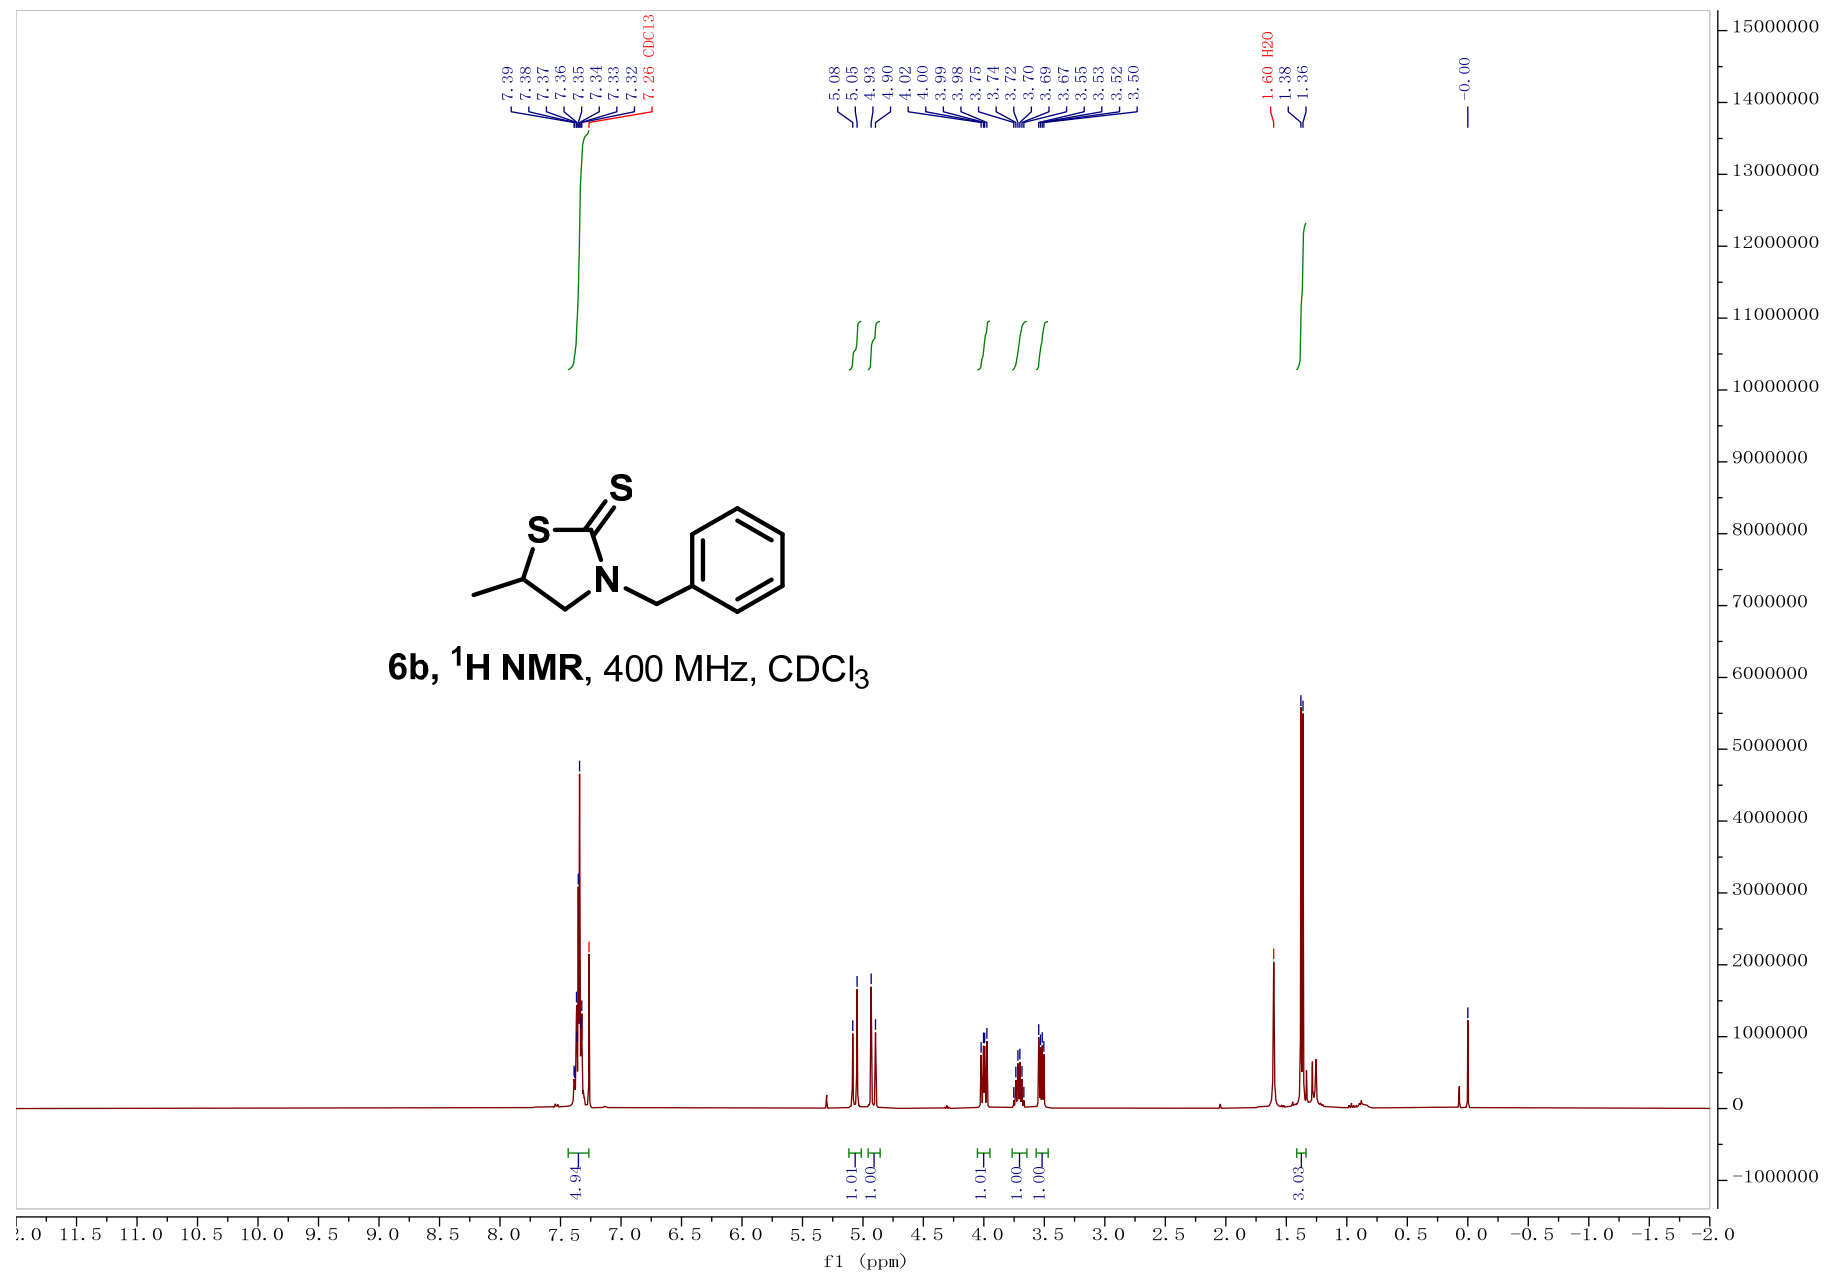

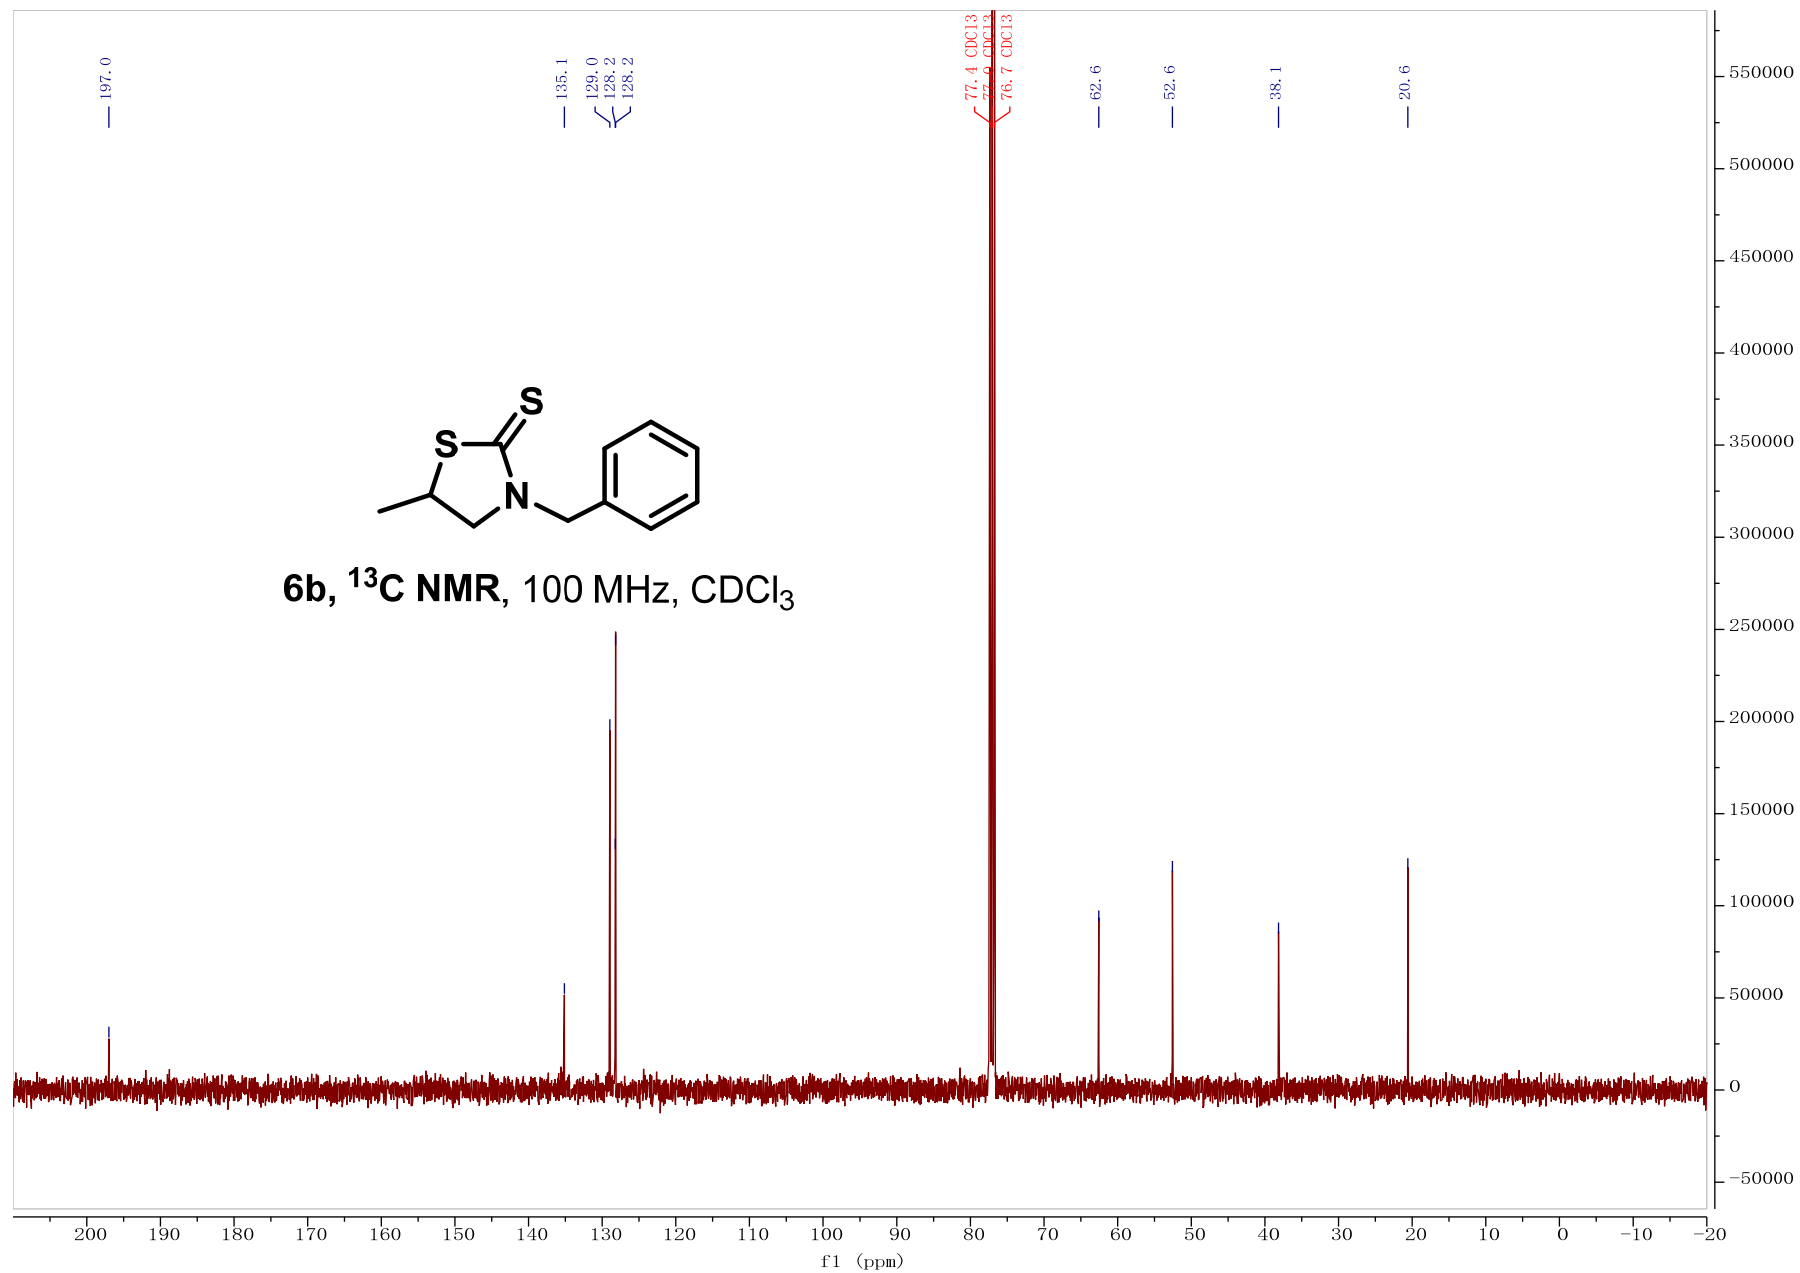

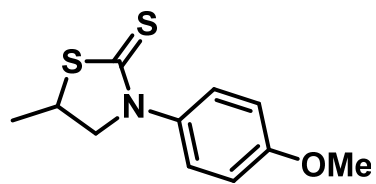

**6c**,  $^1\text{H}$  NMR, 400 MHz,  $\text{CDCl}_3$

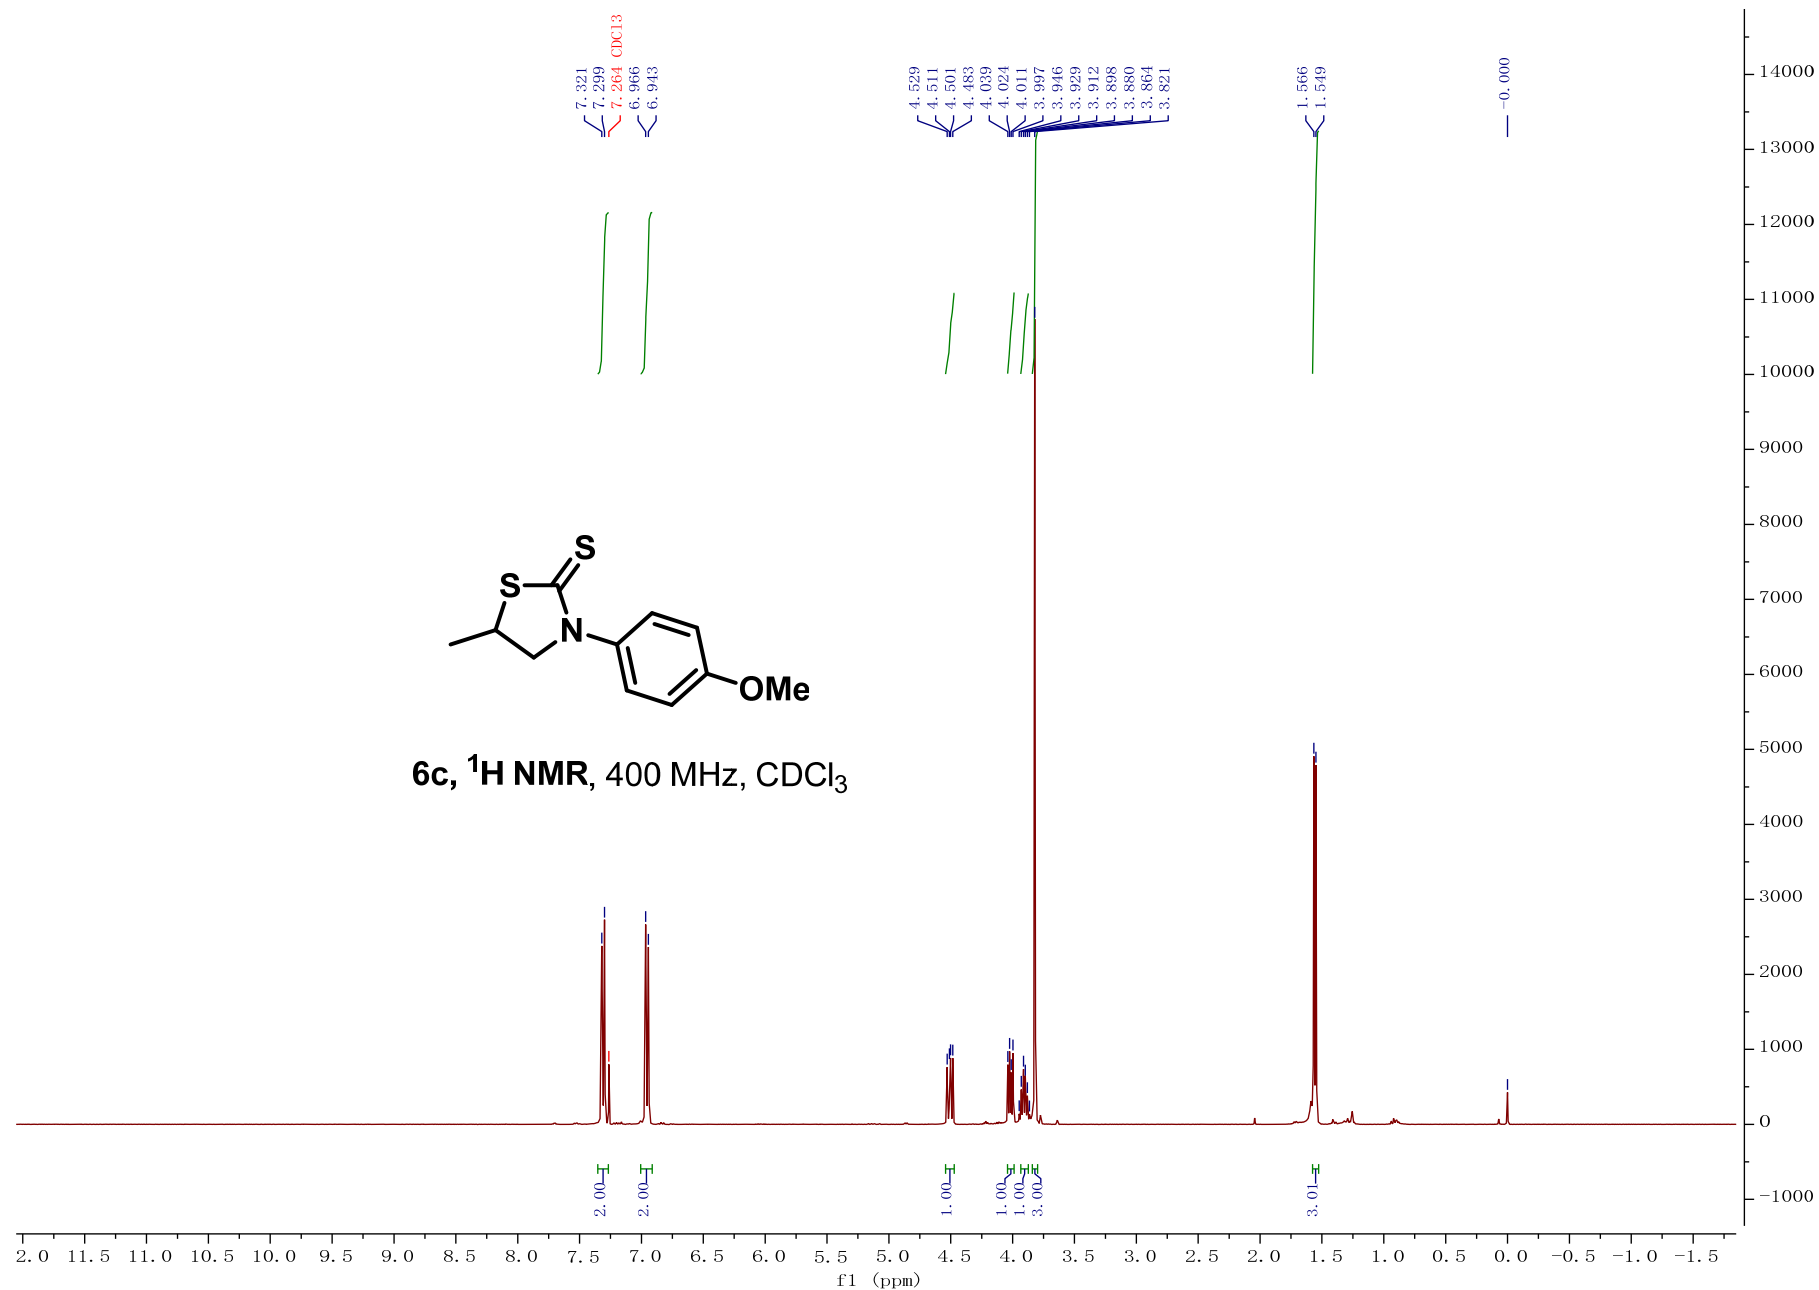

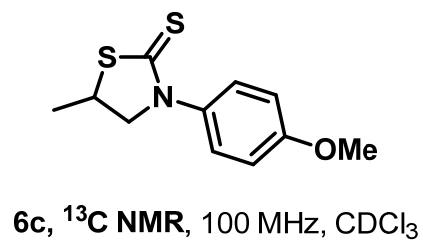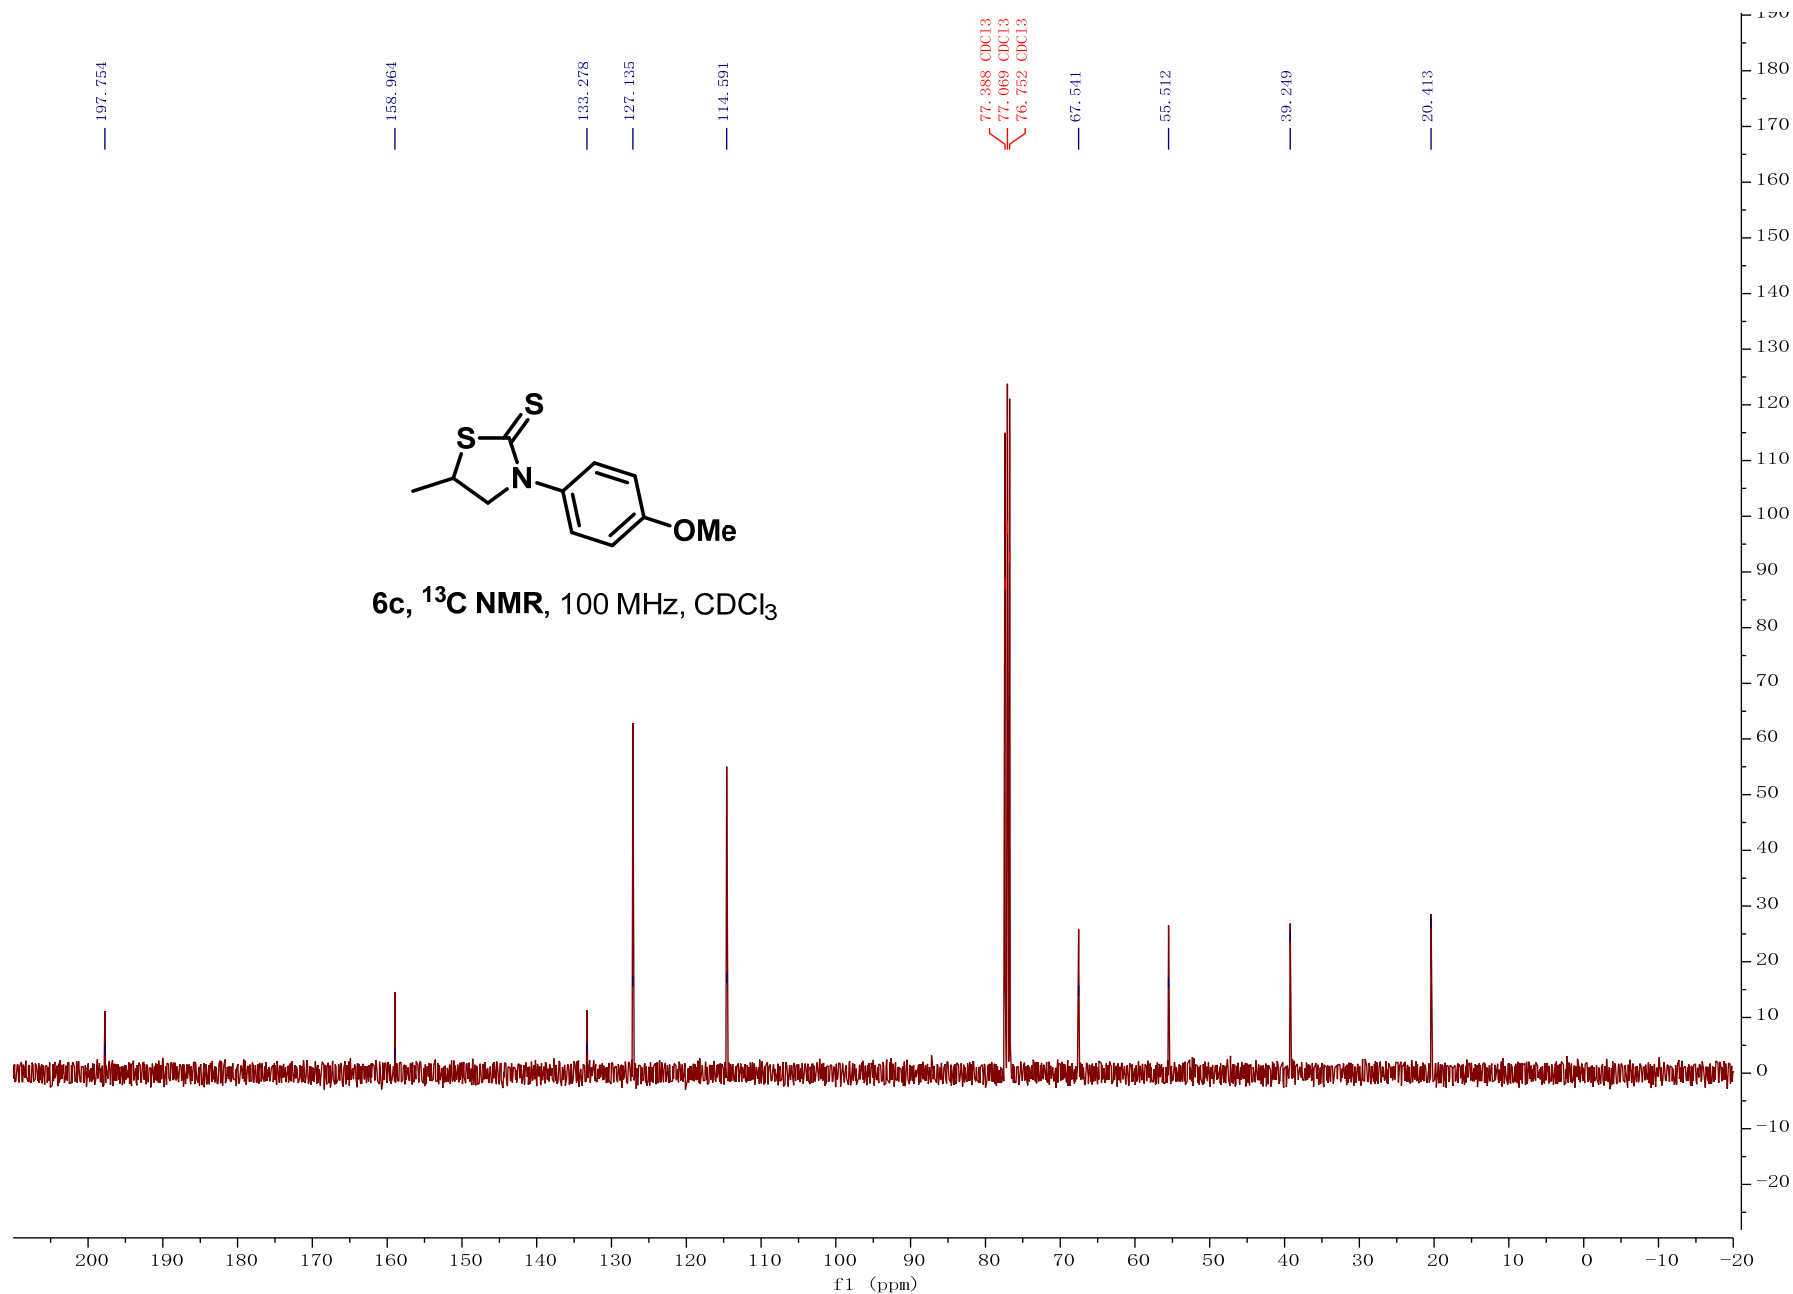

S130

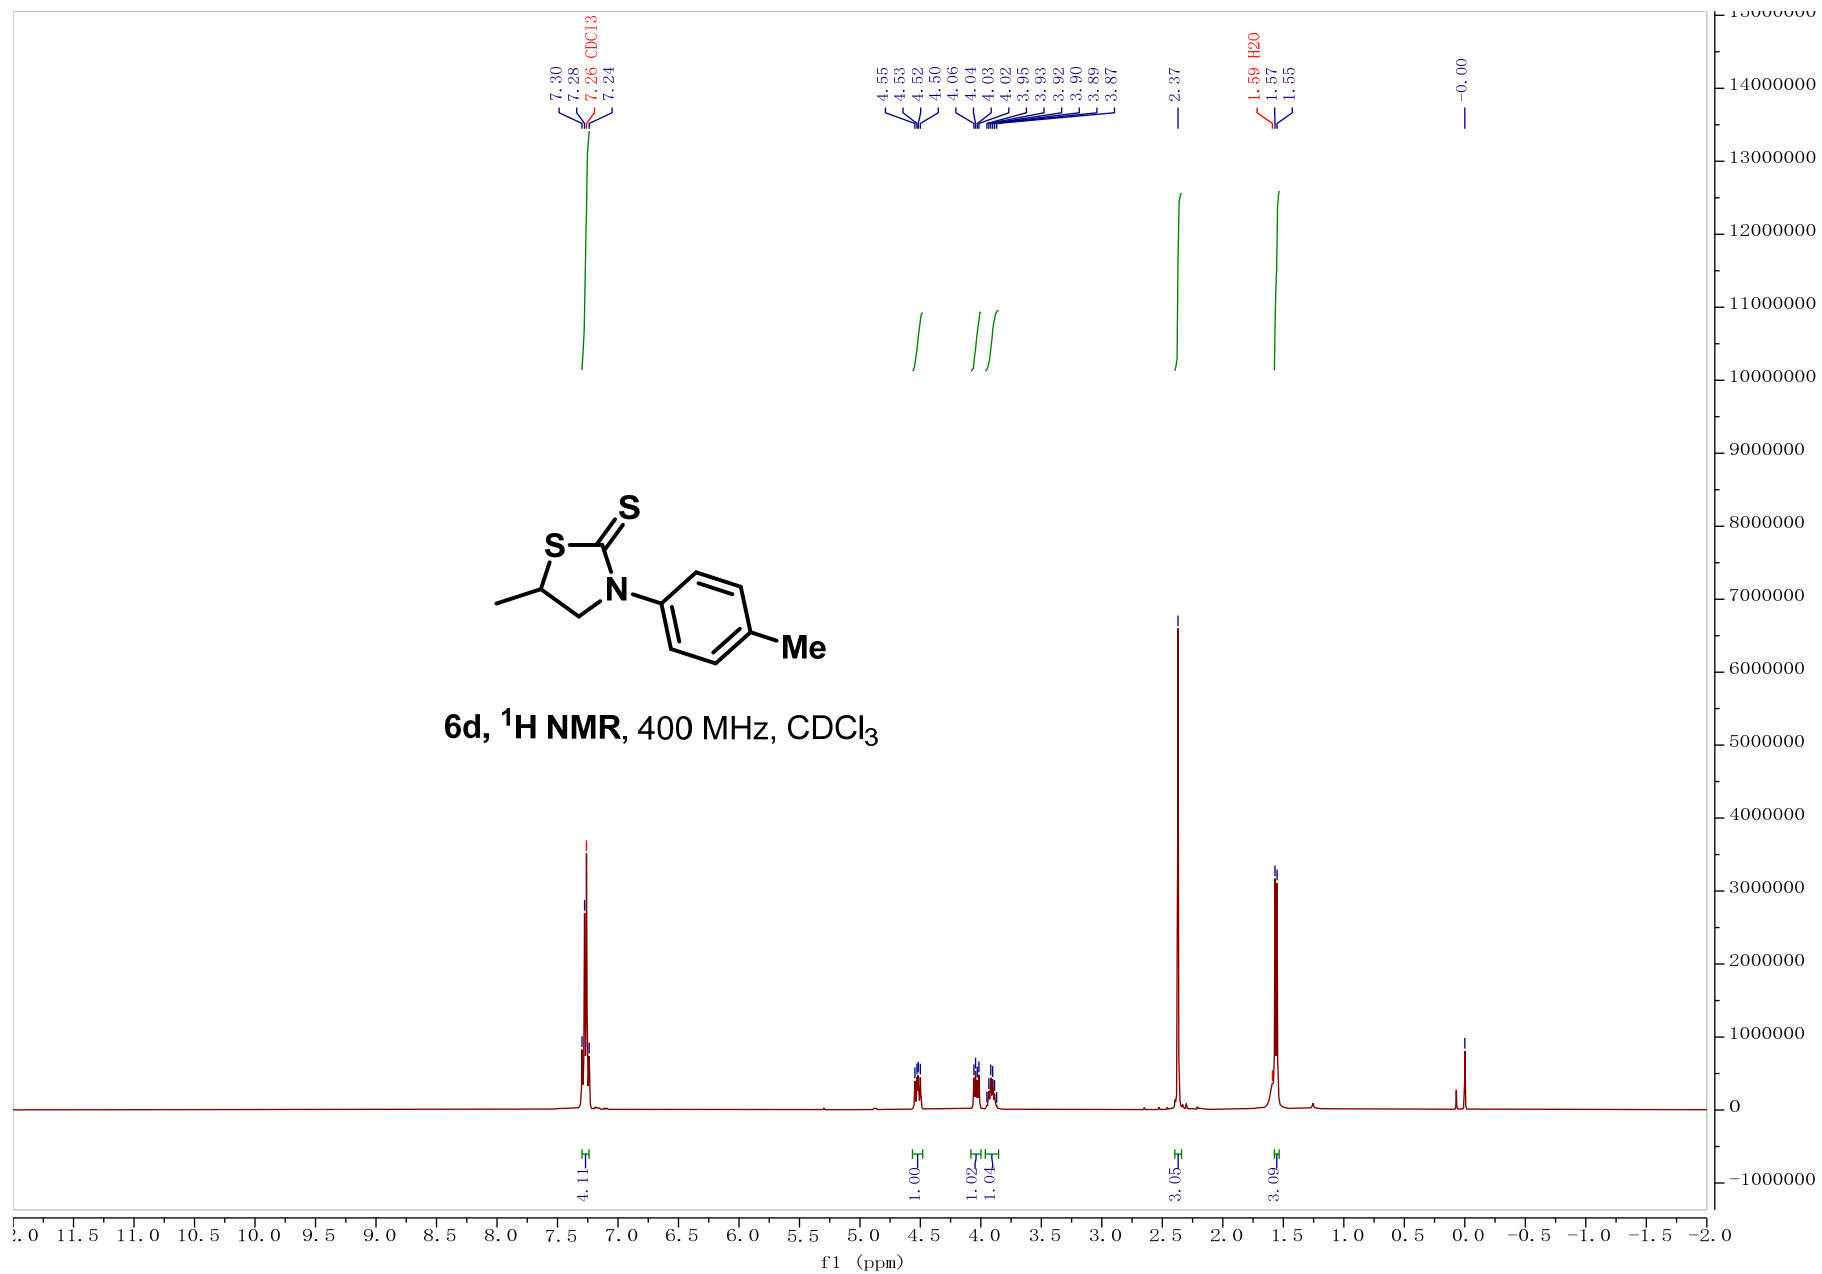

S131

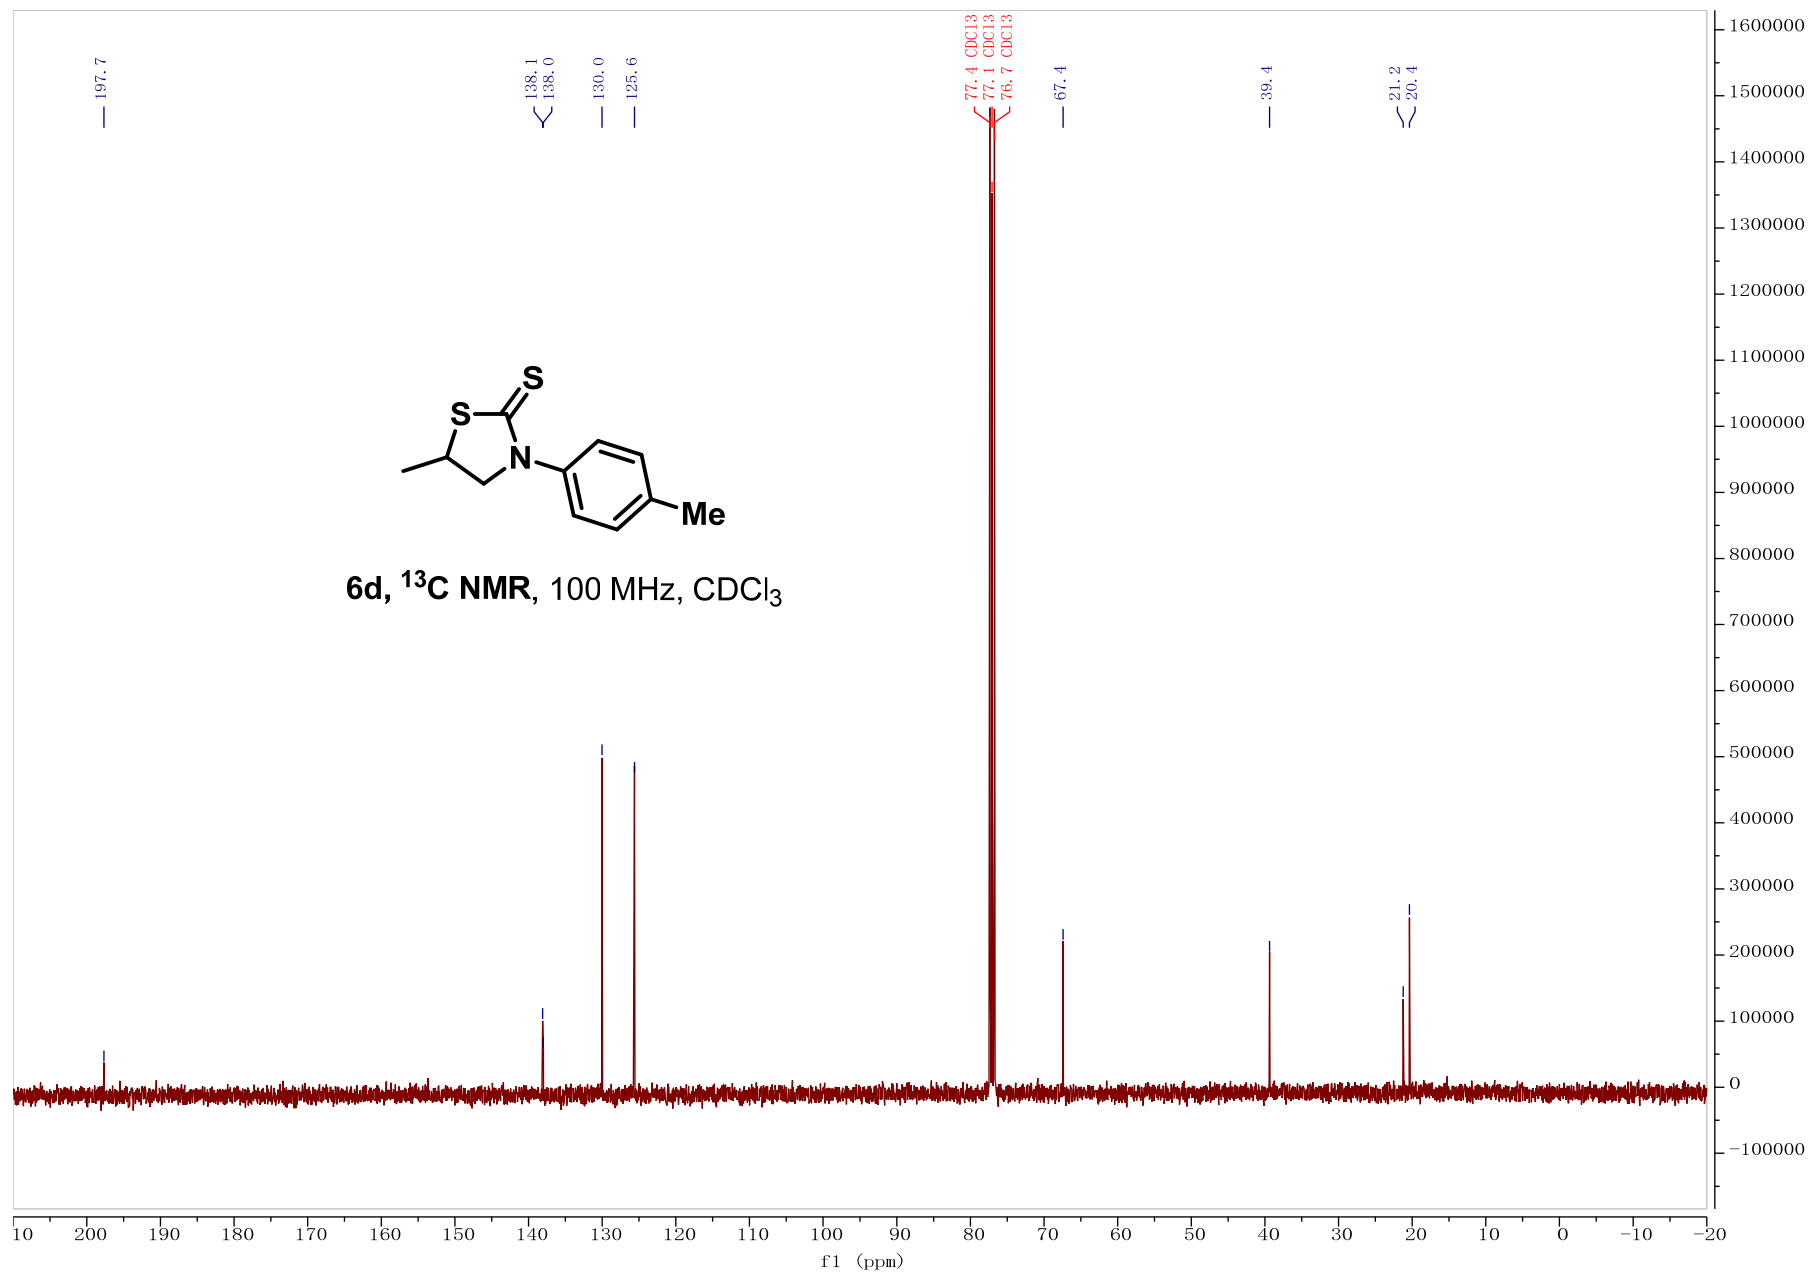

S132

### 13. Spectroscopic data for compounds compound 7-11

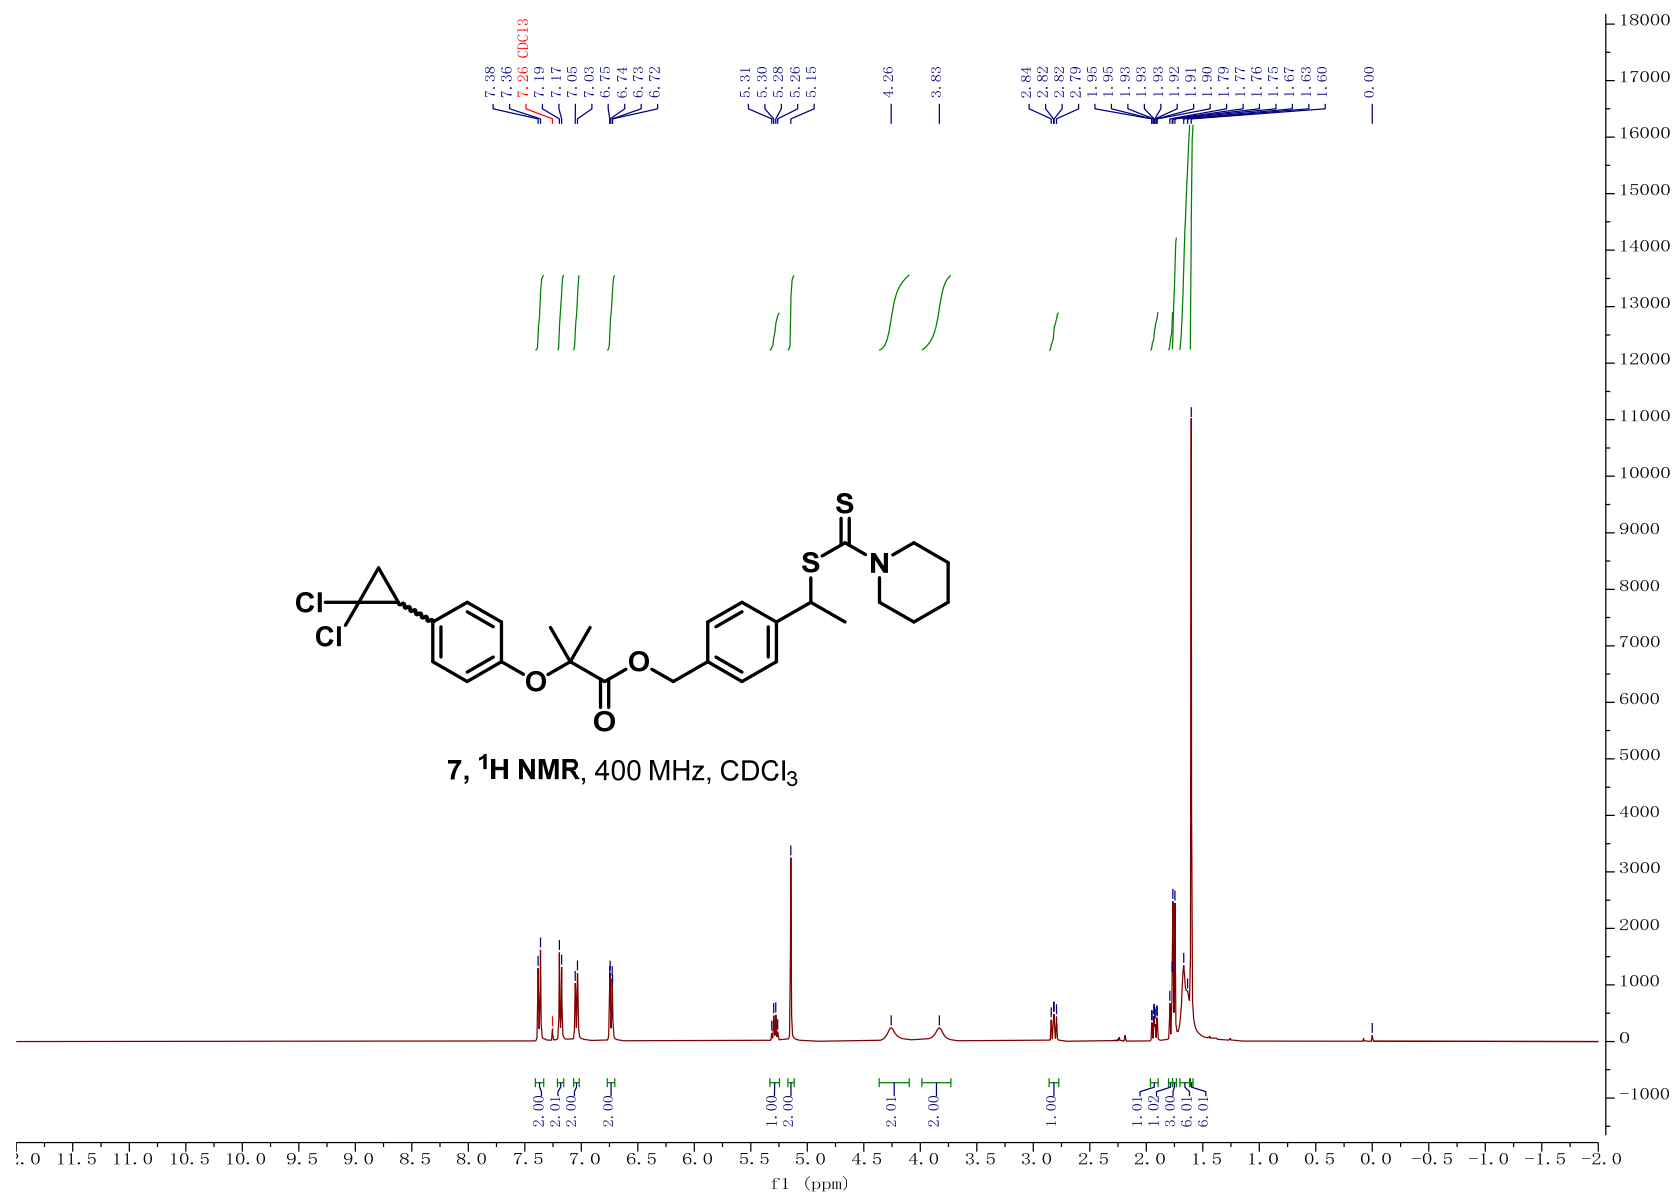

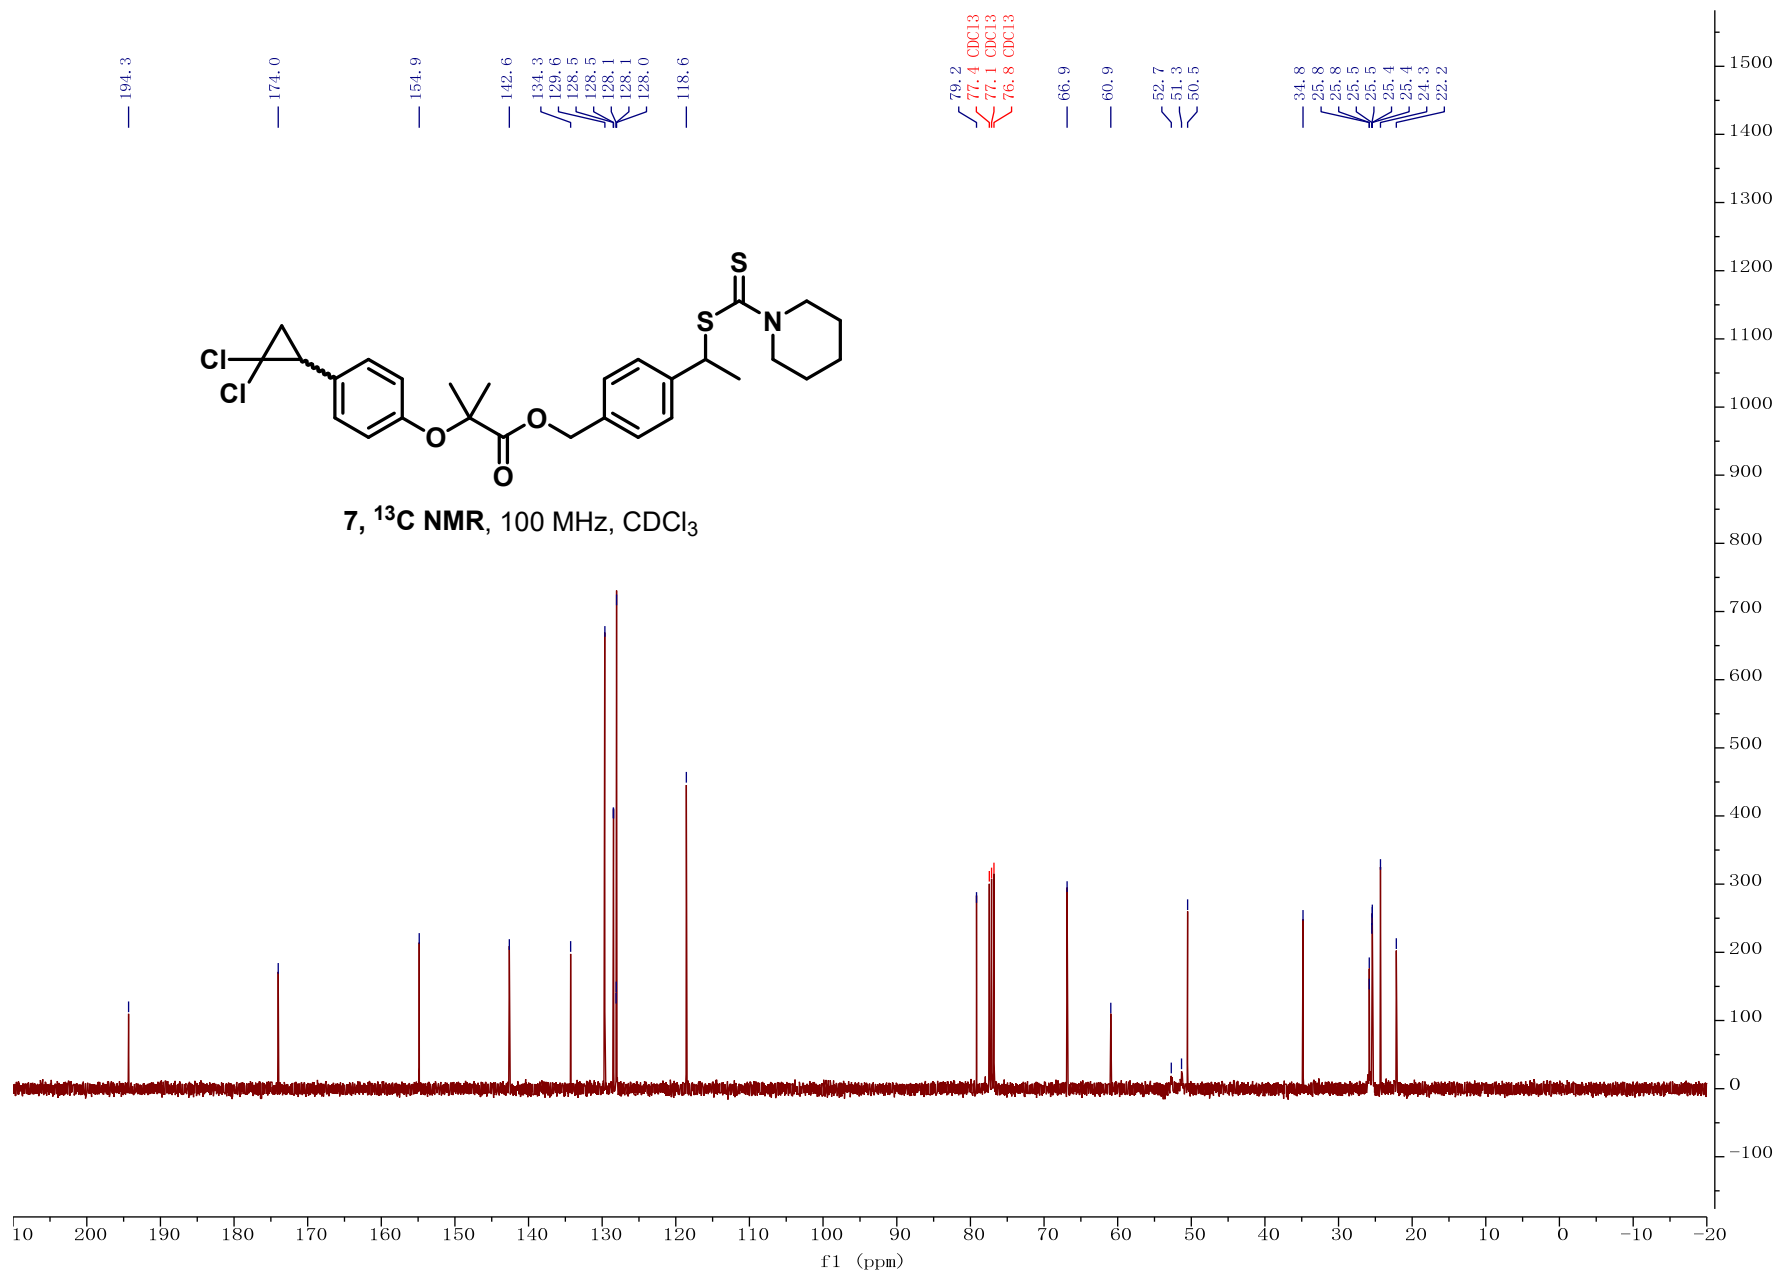

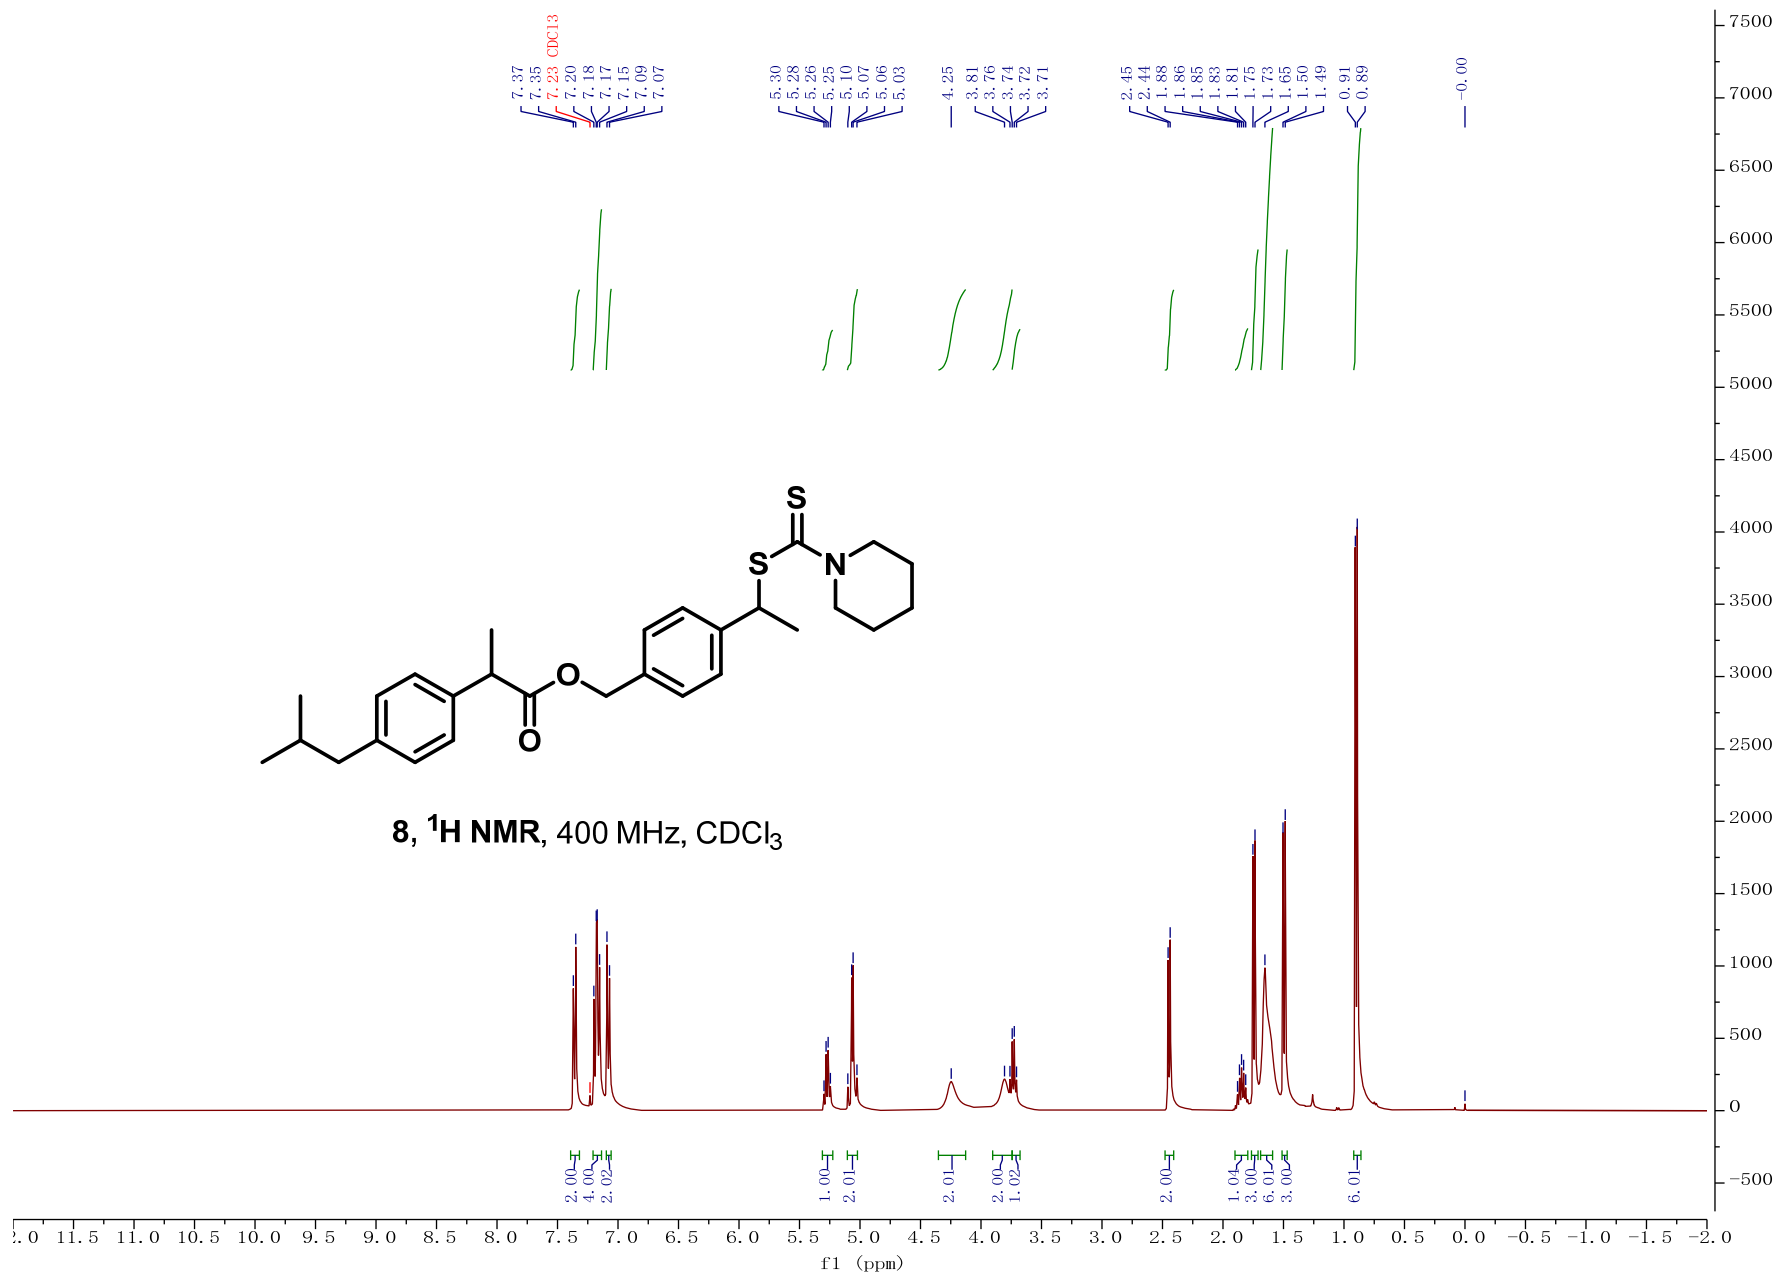

S135

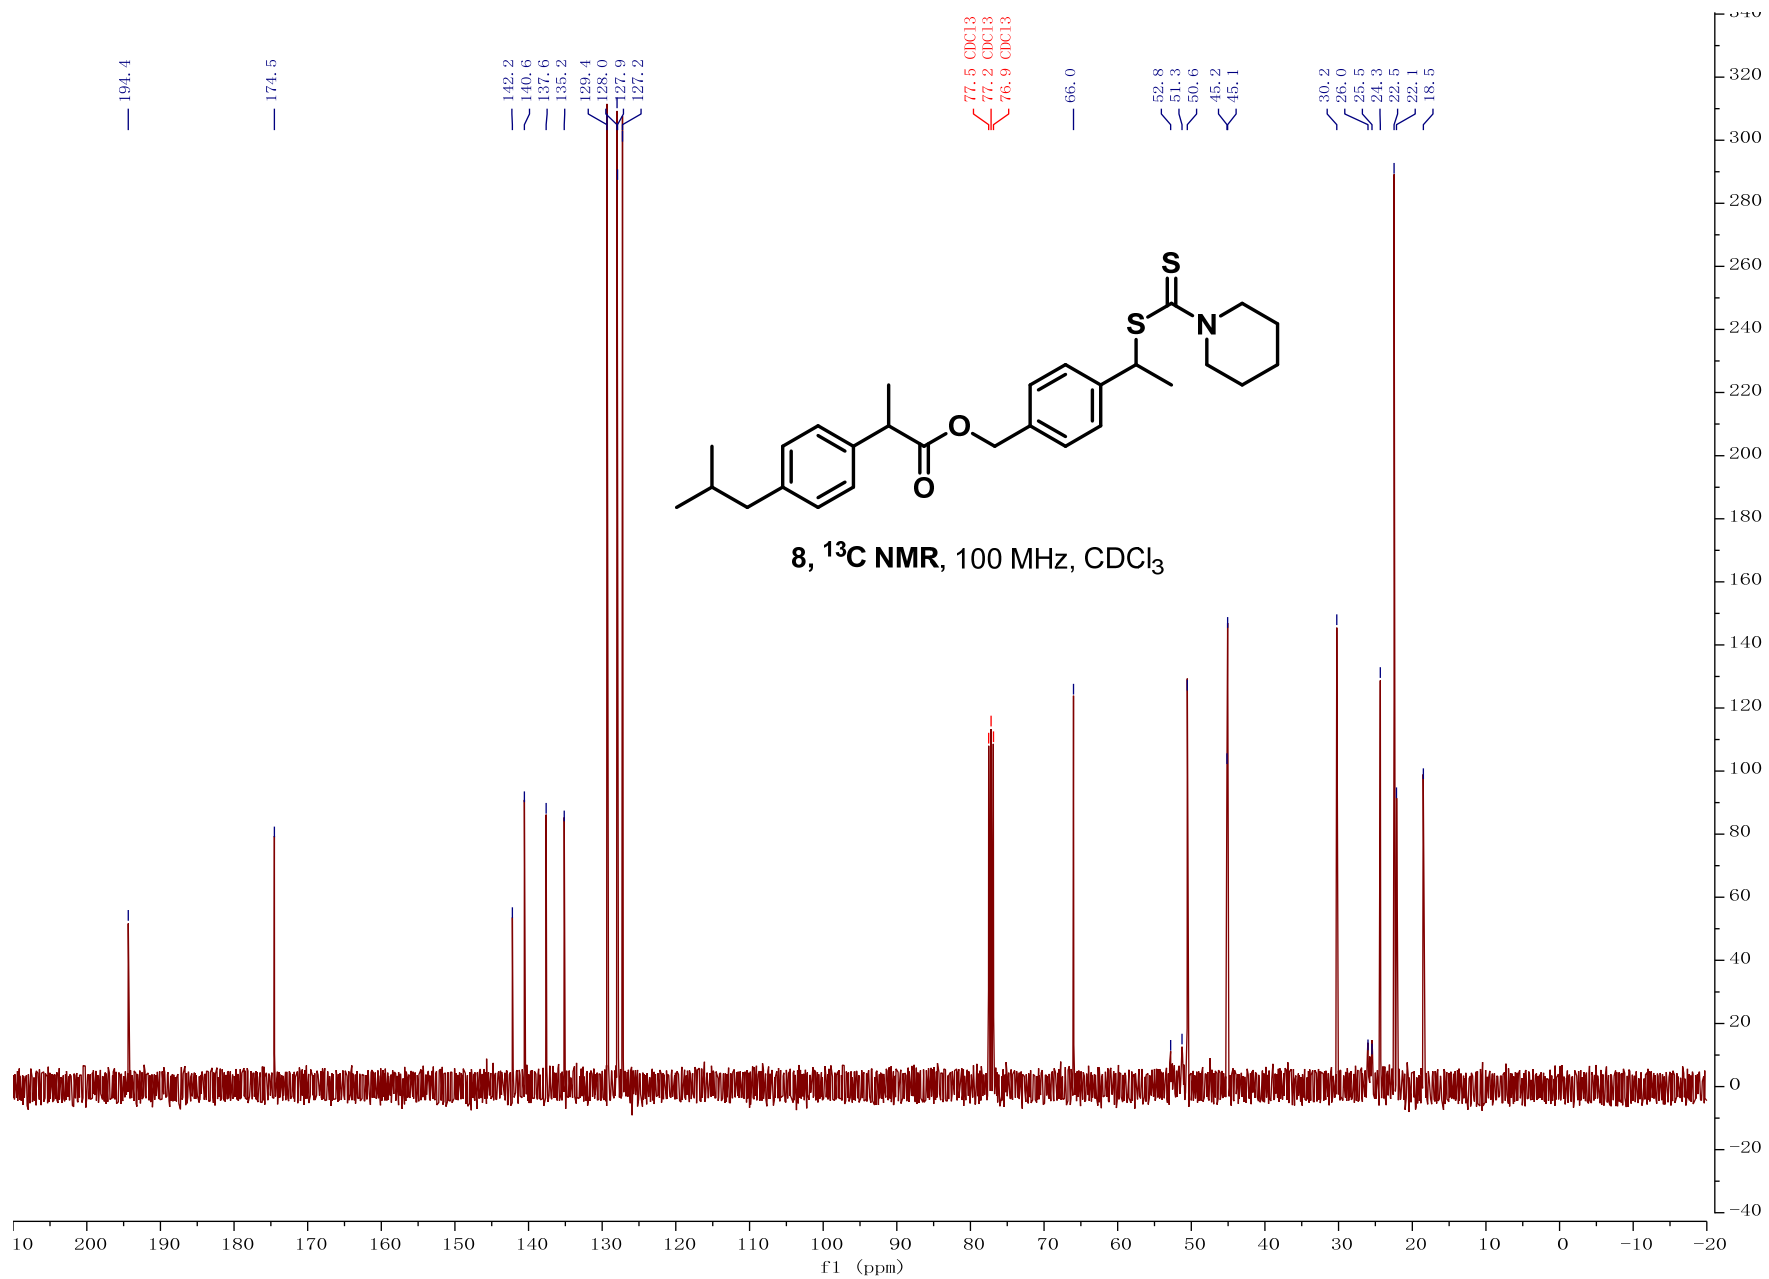

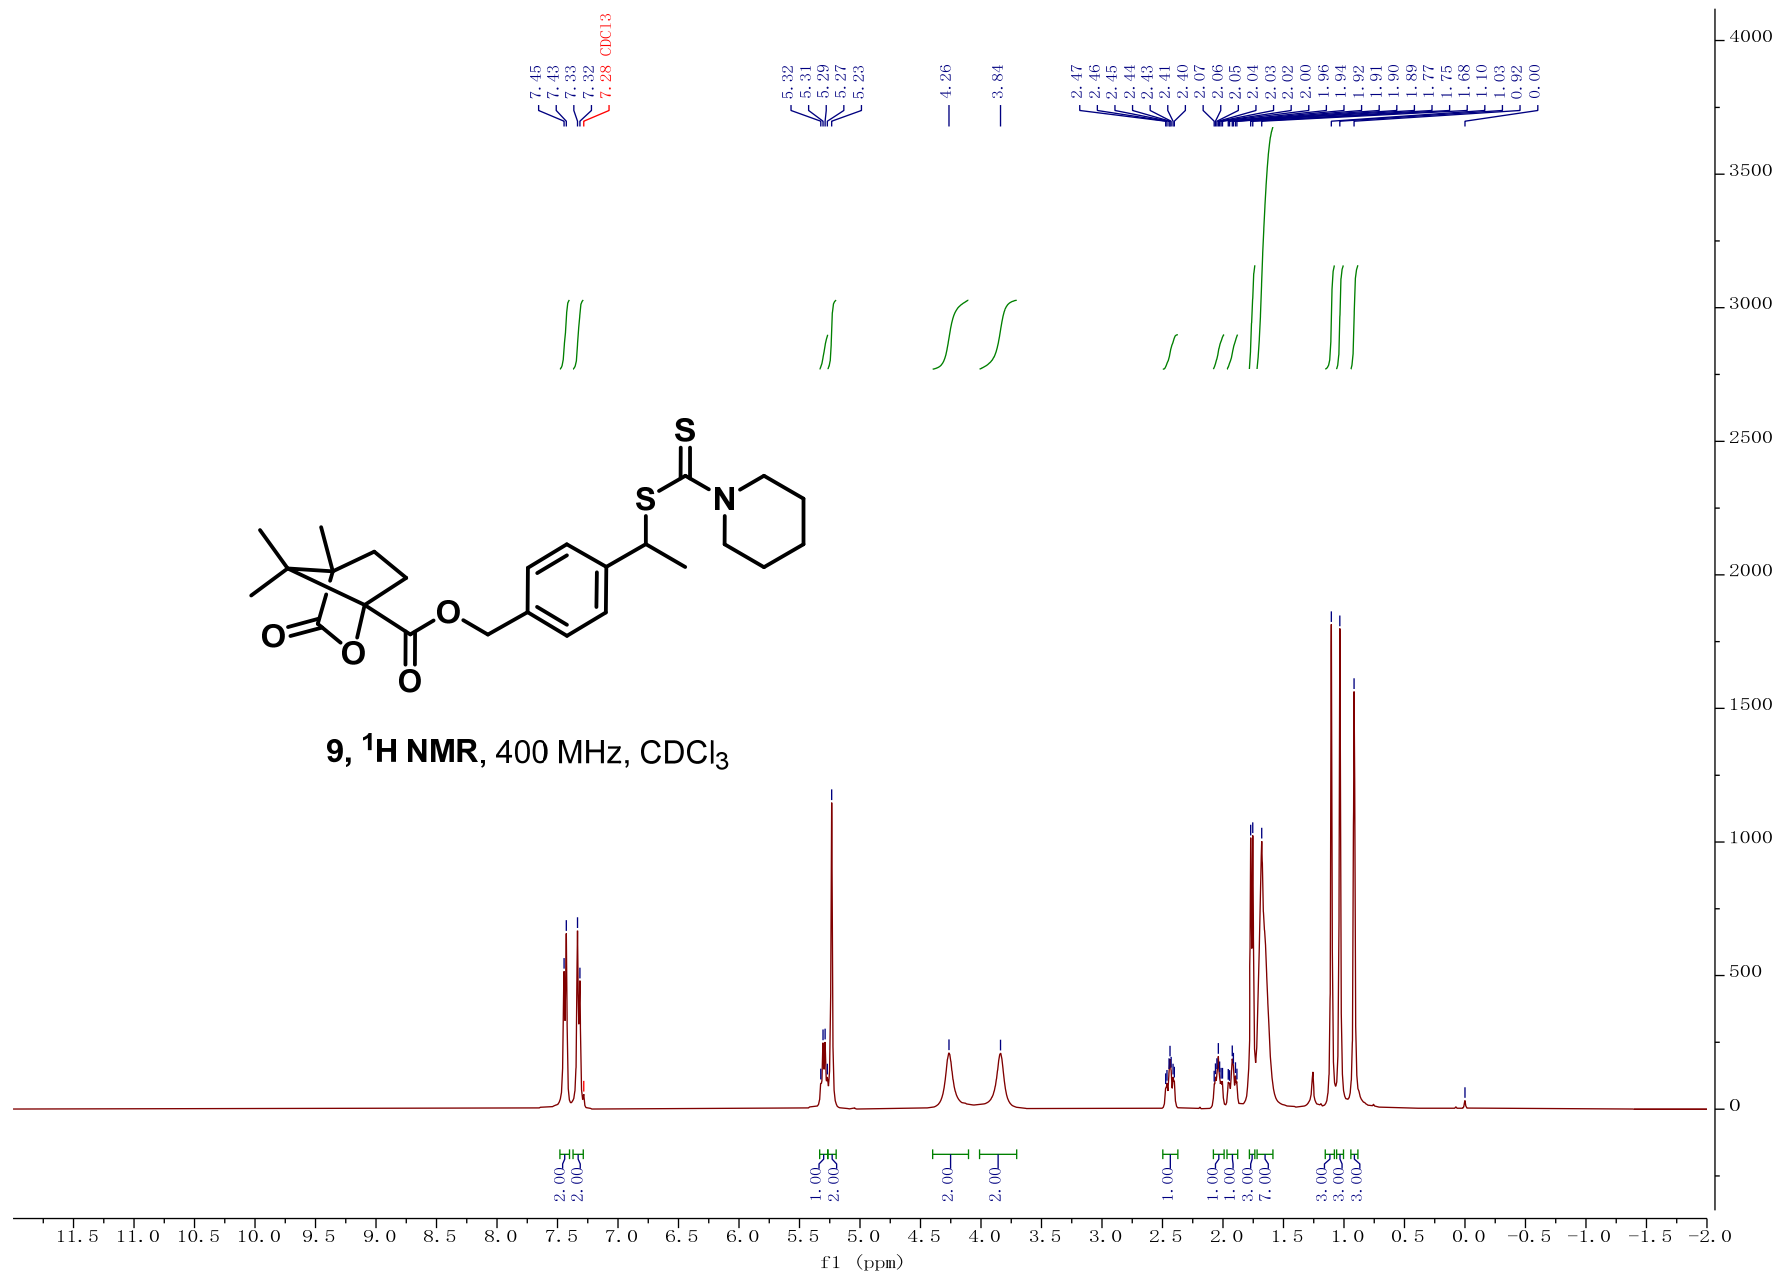

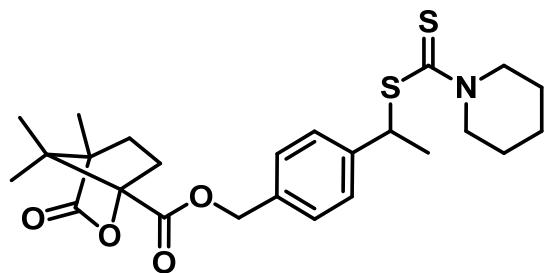

9,  $^{13}\text{C}$  NMR, 100 MHz,  $\text{CDCl}_3$

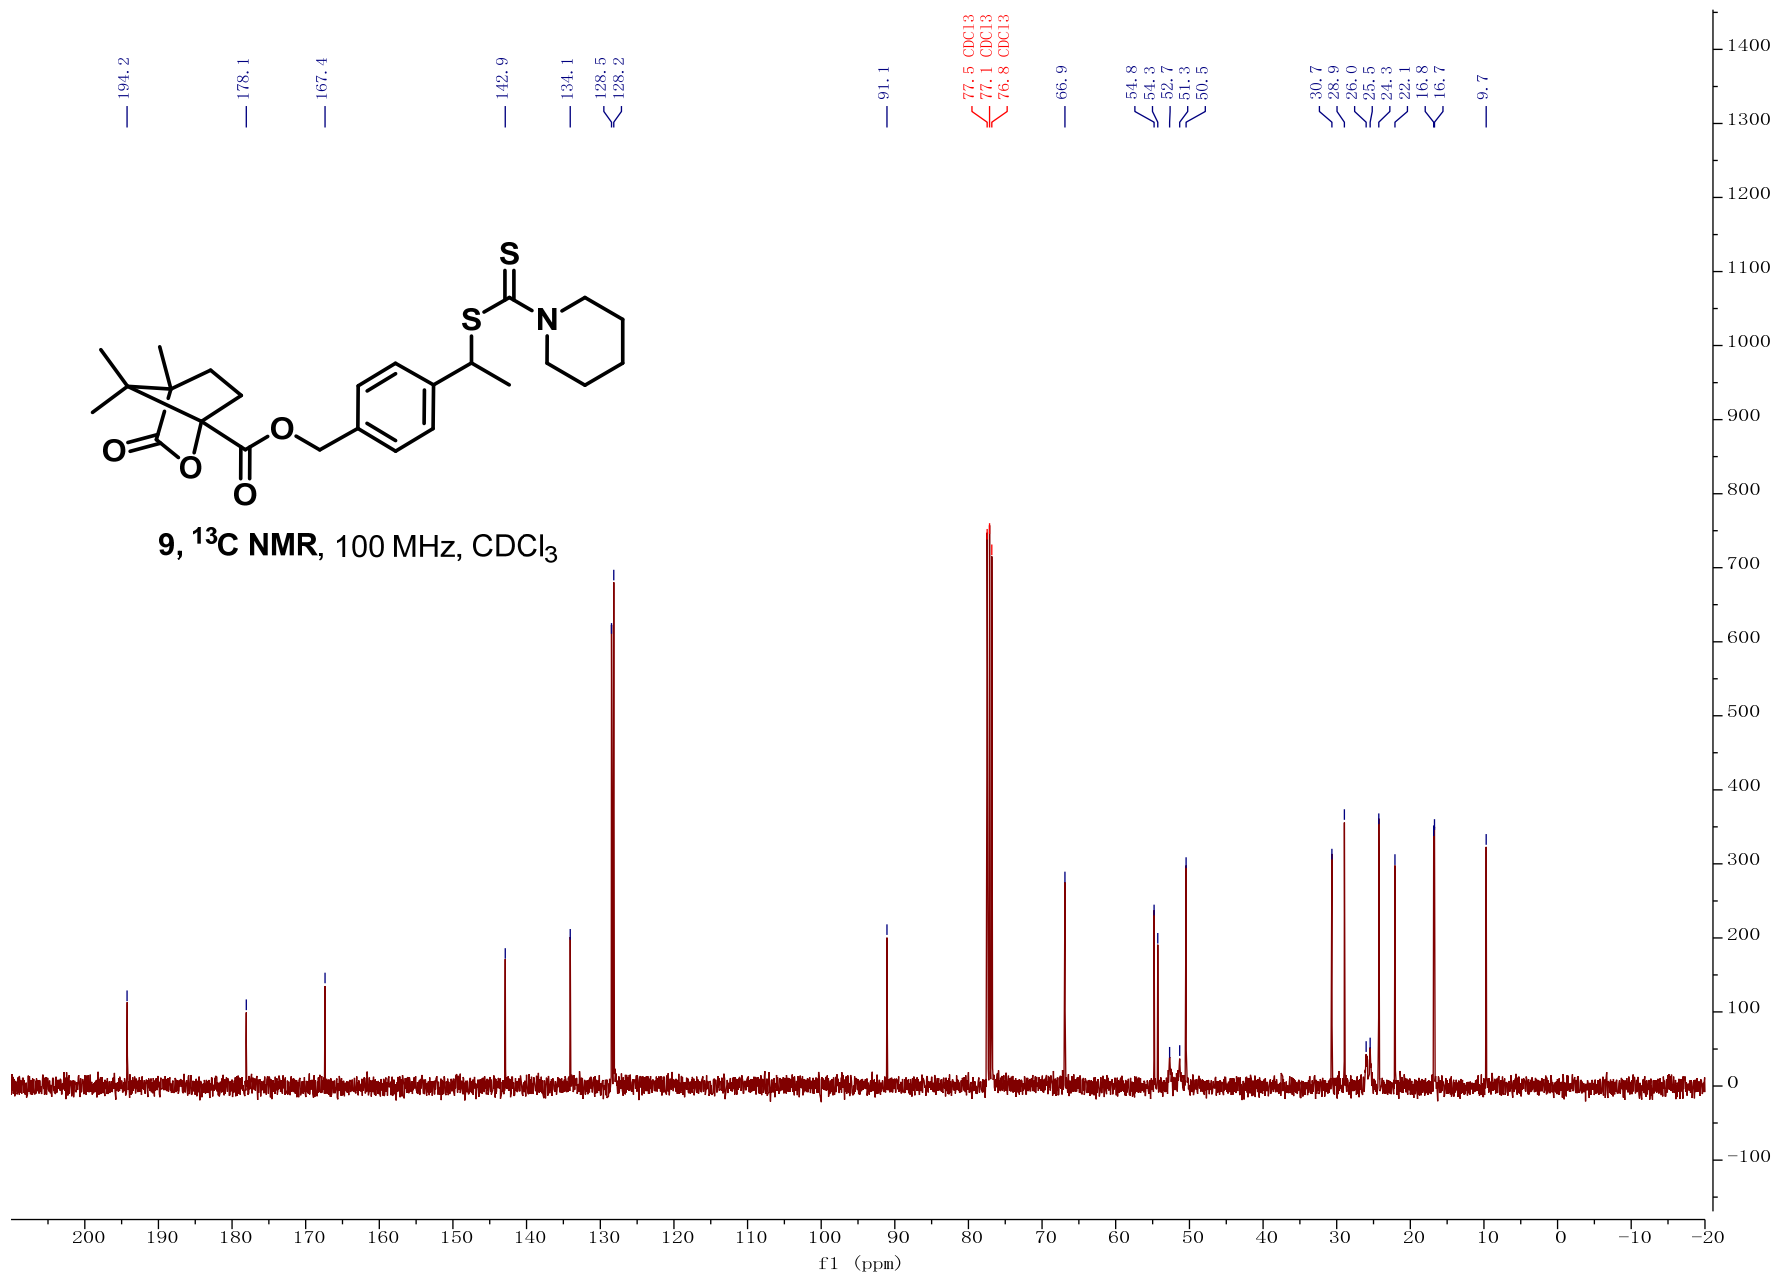

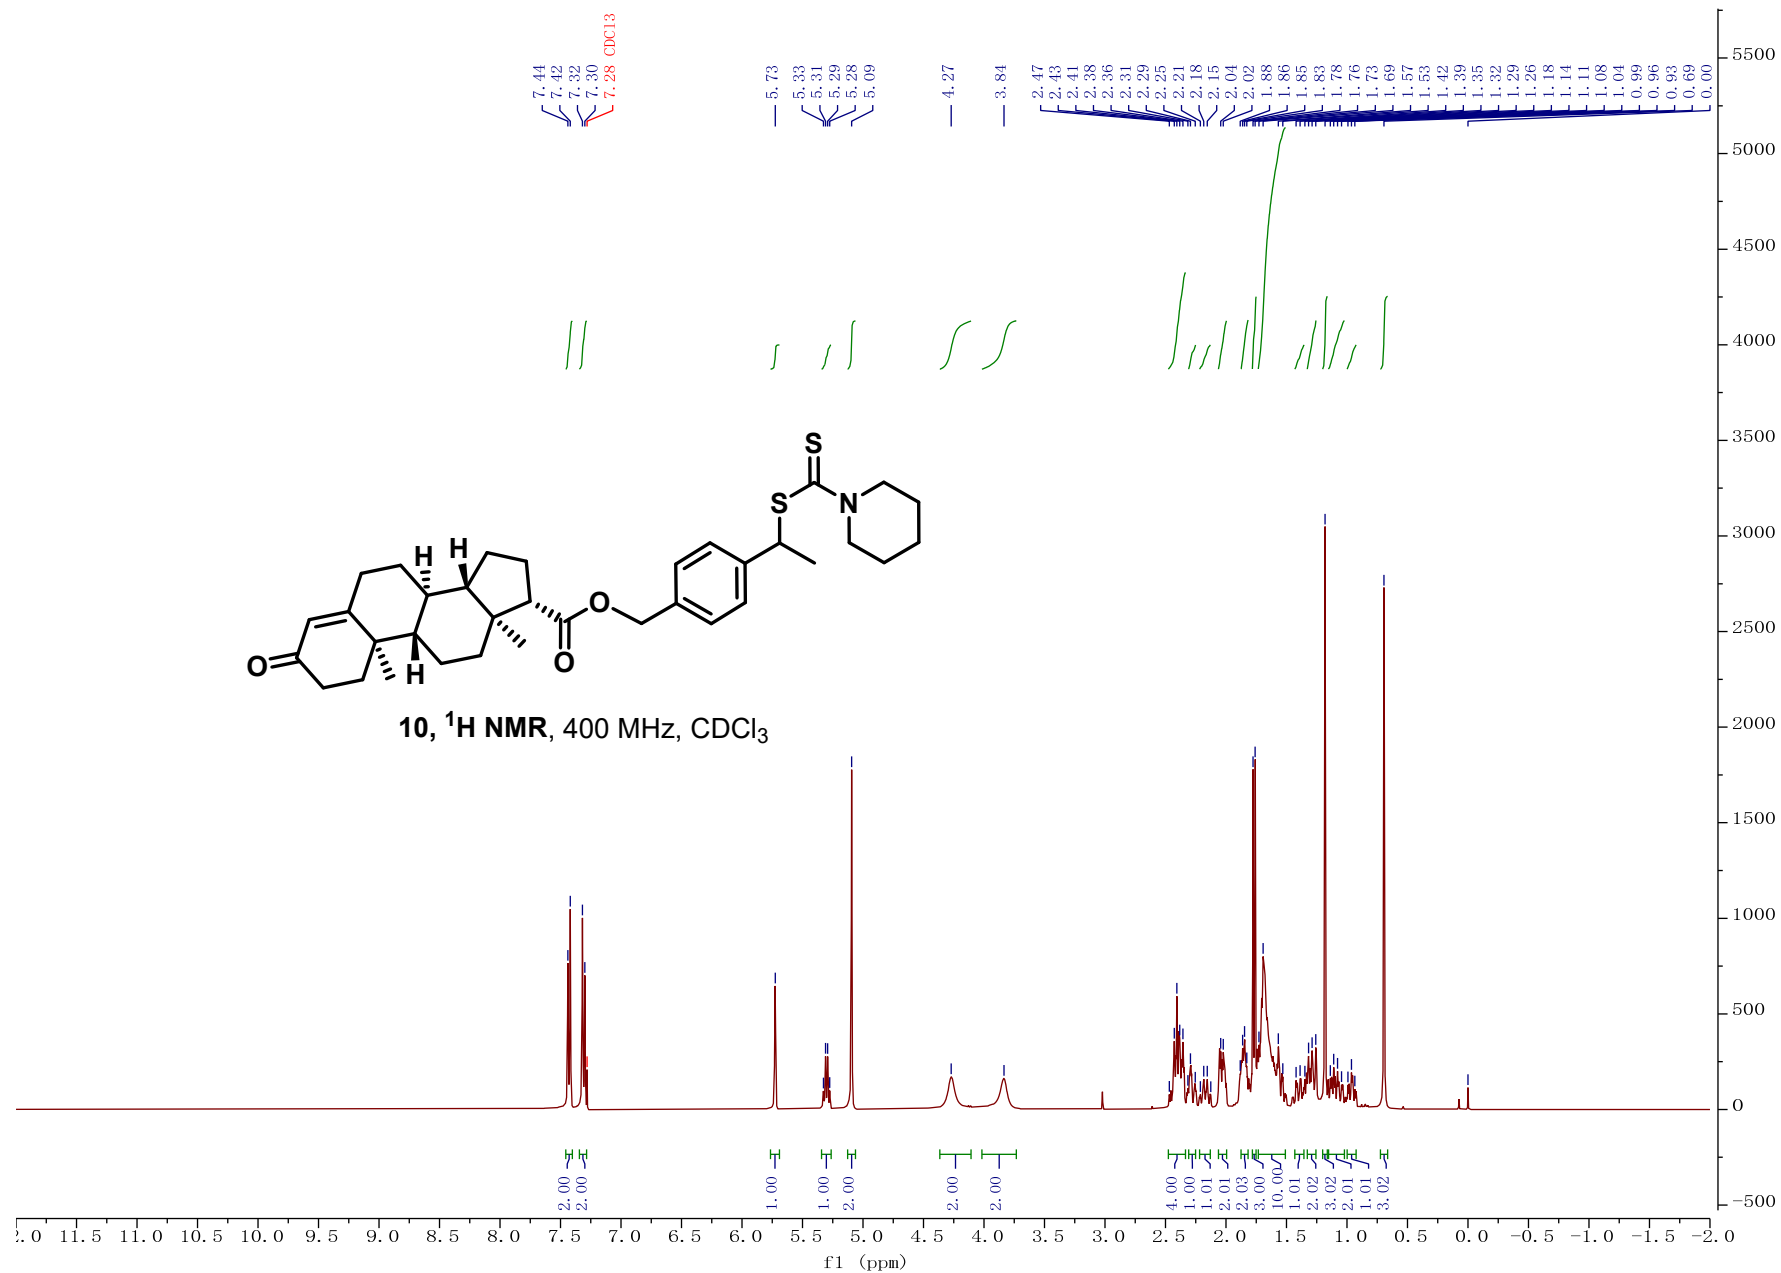

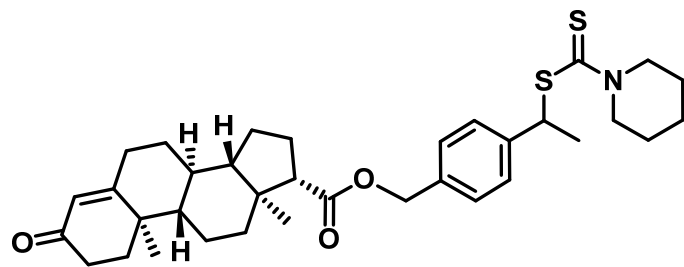

10,  $^{13}\text{C}$  NMR, 100 MHz,  $\text{CDCl}_3$

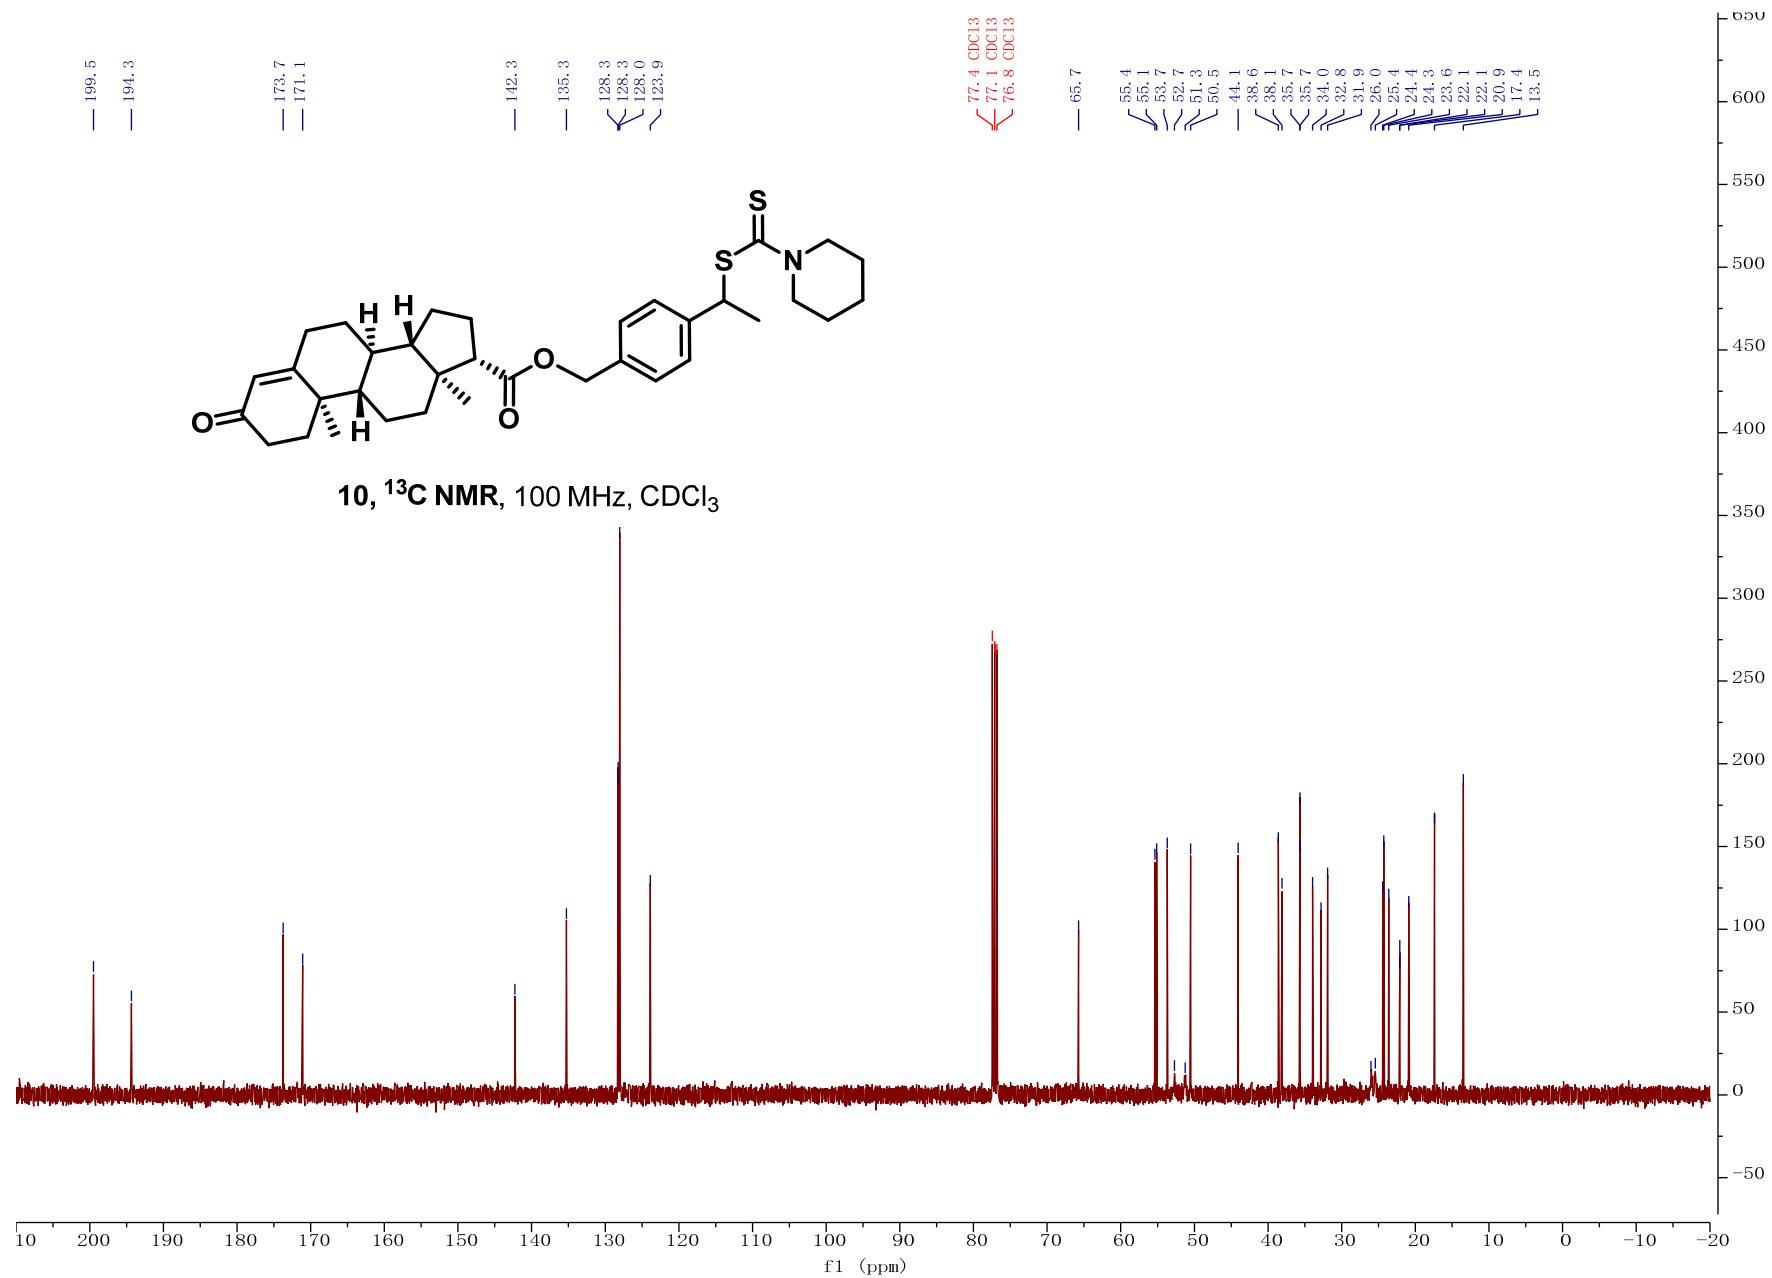

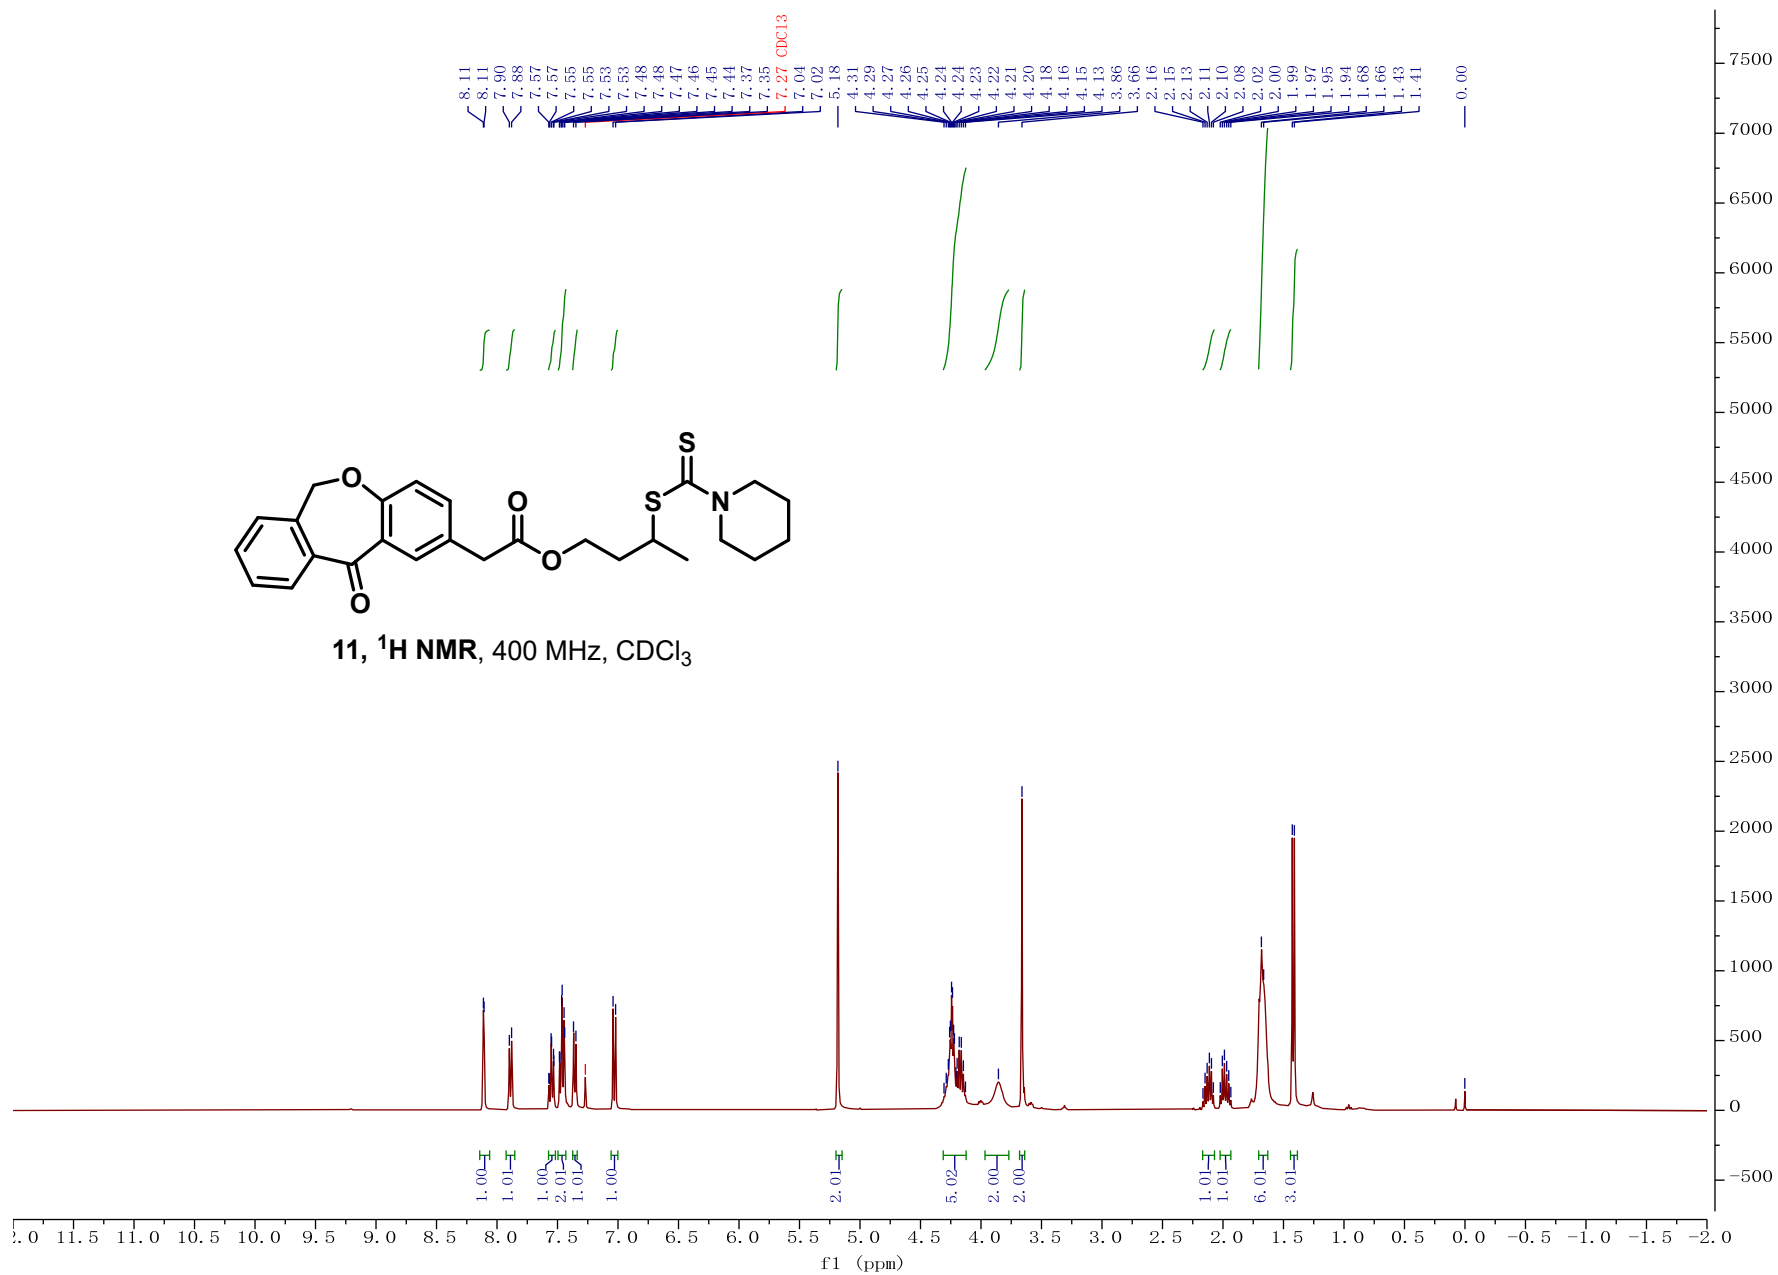

S141

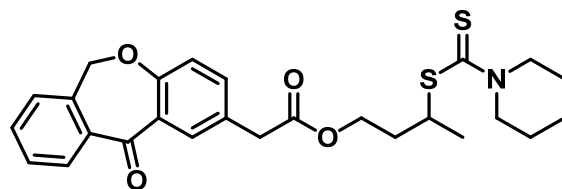

11,  $^{13}\text{C}$  NMR, 100 MHz,  $\text{CDCl}_3$

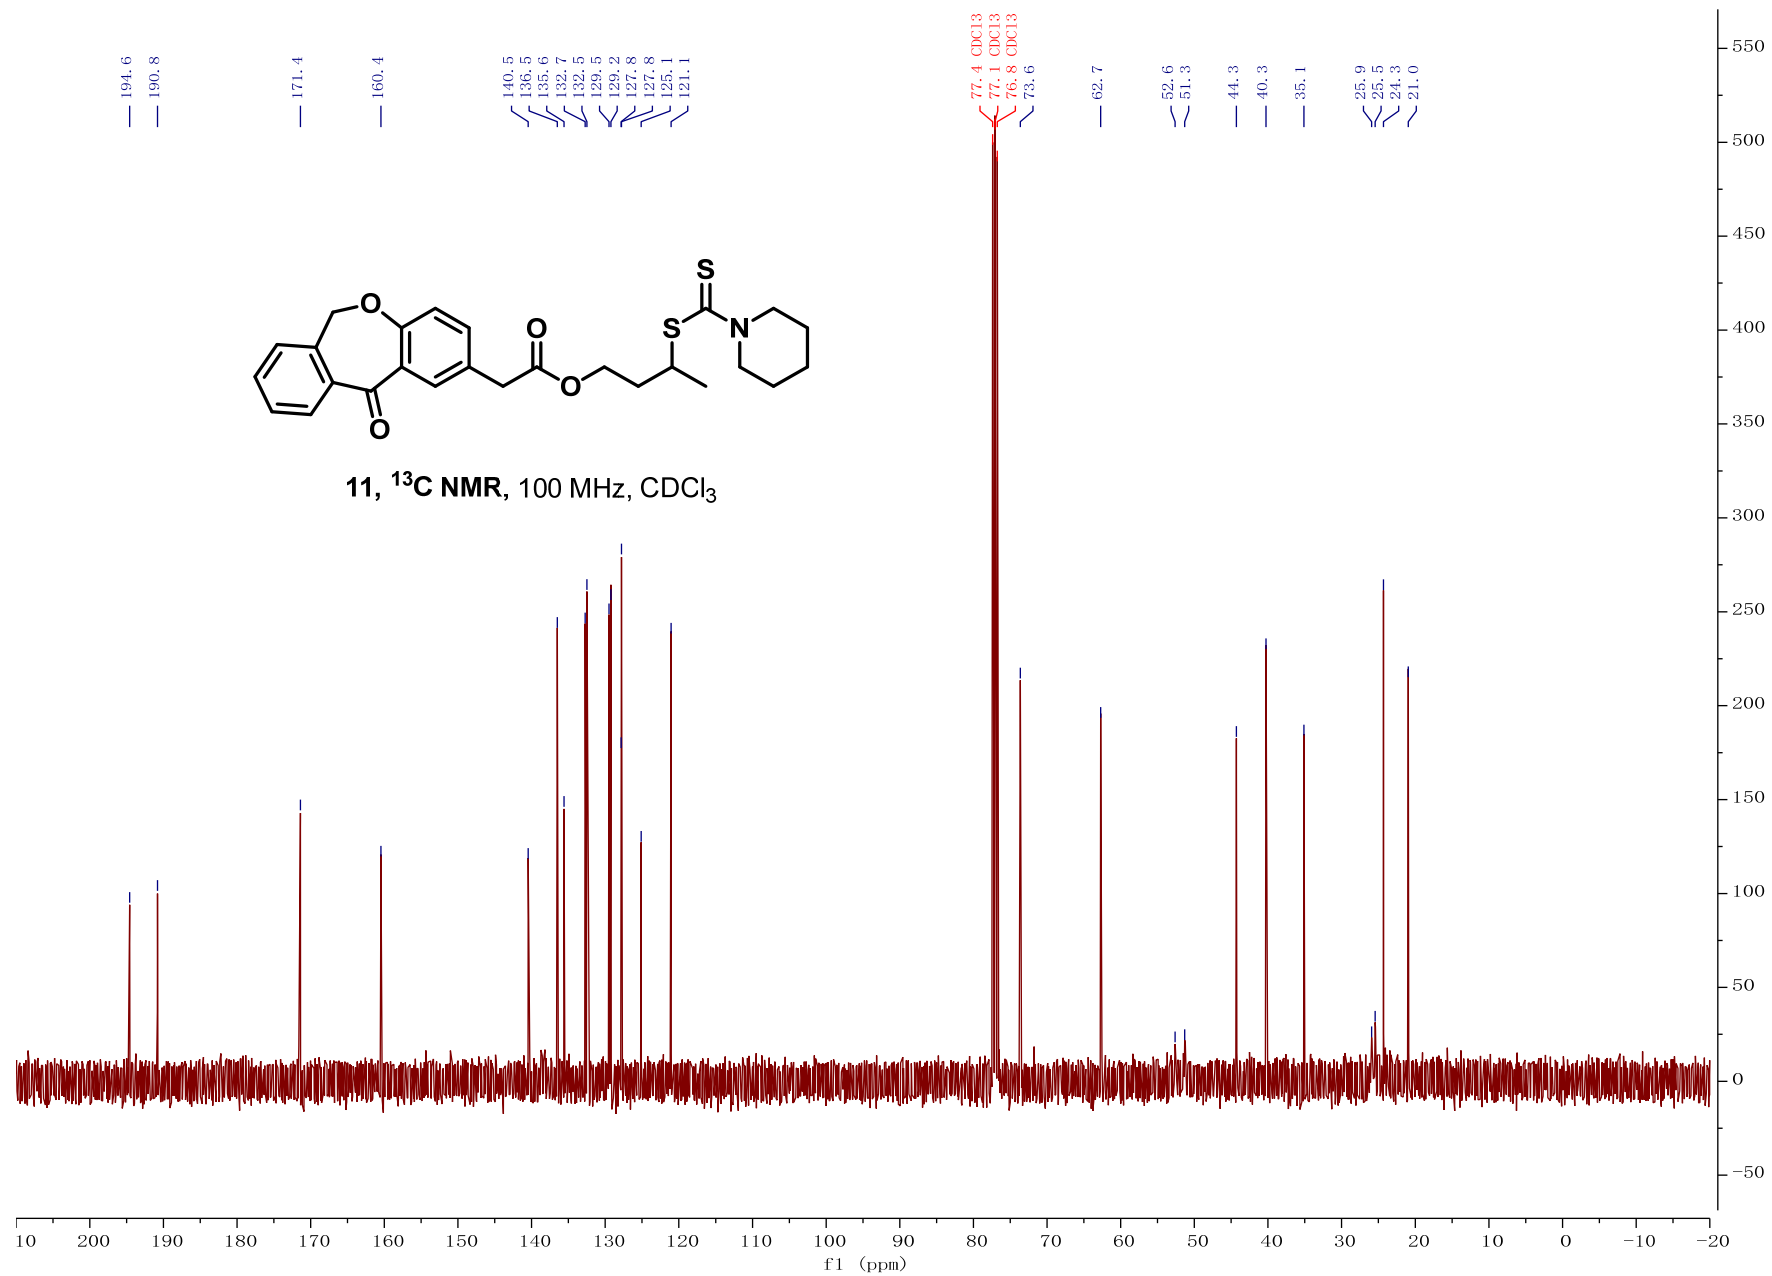

Supplement: d5qo00308c1.pdf [file d5qo00308c1.pdf]
